# Supplementary material for: Next-Generation Camera Trapping: Systematic Review of Historic Trends Suggests Keys to Expanded Research Applications in Ecology and Conservation
Source: Frontiers journal article supplement (doi:10.3389/fevo.2021.617996), 2021-02-26
Supplement: Table_7.xlsx [file Table_7.xlsx]

## Sheet: Ecoregion_final
PaperID	Author	Title	Source	PubYear	Volume	Issue	StartPage	EndPage	Country	Continent	Lat	Long	Ecoregion	Biome	Realm	Anthropogenic
2	Abi-Said, Mounir R.; El Khoury, Jeannette; Makhlouf, Hassane; Amr, Zuhair S.	Ecology of the Persian Squirrel, Sciurus anomalus, in Horsh Ehden Nature Reserve, Lebanon	VERTEBRATE ZOOLOGY	2014	64	1	127	135	Lebanon	Asia	39.3167	36	Eastern Mediterranean conifer-broadleaf forests	Mediterranean Forests, Woodlands, and Scrub	Palearctic	no
3	Abraha, Essayas Tsegai	First camera trap record of leopards in Eritrea.	Cat News	2016	64		17	18	Eritrea	Africa	15.59	38.95	Djibouti xeric shrublands	Deserts and Xeric Shrublands	Afrotropic	no
4	Abrahams, Mark I.; Peres, Carlos A.; Costa, Hugo C. M.	Manioc Losses by Terrestrial Vertebrates in Western Brazilian Amazonia	JOURNAL OF WILDLIFE MANAGEMENT	2018	82	4	734	746	Brazil	SA	-5.21	-67.17	Juruá-Purus moist forests	Tropical & Subtropical Moist Broadleaf Forests	Neotropic	no
5	Abrahams, Mark I.; Peres, Carlos A.; Costa, Hugo C. M.	Measuring local depletion of terrestrial game vertebrates by central-place hunters in rural Amazonia	PLOS ONE	2017	12	10			Brazil	SA	-5.21	-67.17	Juruá-Purus moist forests	Tropical & Subtropical Moist Broadleaf Forests	Neotropic	no
6	Abrams, Jesse F.; Hoerig, Lisa A.; Brozovic, Robert; Axtner, Jan; Crampton-Platt, Alex; Mohamed, Azlan; Wong, Seth T.; Sollmann, Rahel; Yu, Douglas W.; Wilting, Andreas	Shifting up a gear with iDNA: From mammal detection events to standardised surveys	JOURNAL OF APPLIED ECOLOGY	2019	56	7	1637	1648	Borneo	Asia	5.35	117.41	Borneo lowland rain forests	Tropical & Subtropical Moist Broadleaf Forests	Indomalayan	no
7	Abu Baker, Mohammad A.; Emerson, Sara E.; Brown, Joel S.	Foraging and habitat use of eastern cottontails (Sylvilagus floridanus) in an urban landscape	URBAN ECOSYSTEMS	2015	18	3	977	987	USA	NA	41.87	-87.65	Central US forest-grasslands transition	Temperate Grasslands, Savannas, and Shrublands	Nearctic	yes
9	Adila, Nurfatin; Sasidhran, Selvadurai; Kamarudin, Norizah; Puan, Chong Leong; Azhar, Badrul; Lindenmayer, David B.	Effects of peat swamp logging and agricultural expansion on species richness of native mammals in Peninsular Malaysia	BASIC AND APPLIED ECOLOGY	2017	22		1	10	Malaysia	Asia	3.67404	101.075	Peninsular Malaysian rain forests	Tropical & Subtropical Moist Broadleaf Forests	Indomalayan	no
10	Aditya, Vikram; Ganesh, Thyagarajan	Camera trap records of Rusty-spotted Cat Prionailurus rubiginosus and Leopard Cat Prionailurus bengalensis (Mammalia: Carnivora: Felidae) from Papikonda National Park, northern Eastern Ghats, India	Journal of Threatened Taxa	2016	8	5	8818	8819	India	Asia	180 29’31”–190 10’53”N	790 32’28”–830 14’0”E	East Deccan moist deciduous forests	Tropical & Subtropical Moist Broadleaf Forests	Indomalayan	no
11	Aditya, Vikram; Ganesh, T.	First camera trap records of Indian Crested Porcupine, Hystrix indica Kerr, 1792 from Papikonda National Park, Andhra Pradesh.	Small Mammal Mail	2015	7	1	4	5	India	Asia	180 29’31”–190 10’53”N	790 32’28”–830 14’0”E	East Deccan moist deciduous forests	Tropical & Subtropical Moist Broadleaf Forests	Indomalayan	no
14	Agha, Mickey; Smith, Amanda L.; Lovich, Jeffrey E.; Delaney, David; Ennen, Joshua R.; Briggs, Jessica; Fleckenstein, Leo J.; Tennant, Laura A.; Puffer, Shellie R.; Walde, Andrew; Arundel, Terence R.; Price, Steven J.; Todd, Brian D.	Mammalian Mesocarnivore Visitation at Tortoise Burrows in a Wind Farm	JOURNAL OF WILDLIFE MANAGEMENT	2017	81	6	1117	1124	USA	NA	33°57’06” N,	116°40’02” W	California montane chaparral and woodlands	Mediterranean Forests, Woodlands, and Scrub	Nearctic	yes
15	Aguhob, Jeruel Cabadonga; Shah, Junid N.; Elhassan, Esmat Elfaki Mohammed; Al Muhery, Aisha Almurr; Mohamed, Mohamed Mustafa Eltayeb; Al Omairi, Juma Abdulla Saeed Mohammad; Albedwawi, Hamad Hashim Mohammed Khalaf; Al Bedwawi, Obaid Mohammed Salem Mohammed; Alsharif, Hassan Zain; Haij, Afra Mahmood Mohammad Ali	FIRST RECORD OF THE ENDANGERED ARABIAN TAHR ARABITRAGUS JAYAKARI (THOMAS, 1894) IN THE HATTA MOUNTAIN CONSERVATION AREA, DUBAI, UNITED ARAB EMIRATES	Journal of Threatened Taxa	2018	10	11	12561	12565	UAE	Asia	24.7600N	56.1110E	Al-Hajar foothill xeric woodlands and shrublands	Temperate Grasslands, Savannas, and Shrublands	Palearctic	no
16	Ahmed, Ahmed; Yousif, Hayder; Kays, Roland; He, Zhihai	Semantic region of interest and species classification in the deep neural network feature domain	ECOLOGICAL INFORMATICS	2019	52		57	68
17	Ahmed, Shakeel; Al Zaabi, Rashid; Soorae, Pritpal; Shah, Junid N.; Al Hammadi, Eissa; Pusey, Ricardo; Al Dhaheri, Sheikha	Rediscovering the Arabian sand cat (Felis margarita harrisoni) after a gap of 10 years using camera traps in the Western Region of Abu Dhabi, United Arab Emirates	EUROPEAN JOURNAL OF WILDLIFE RESEARCH	2016	62	5	627	631	UAE	Asia	23°58?23 N	53°18?17 E	Arabian-Persian Gulf coastal plane	Deserts and Xeric Shrublands	Palearctic	no
18	Ahumada, Jorge A.; Hurtado, Johanna; Lizcano, Diego	Monitoring the Status and Trends of Tropical Forest Terrestrial Vertebrate Communities from Camera Trap Data: A Tool for Conservation	PLOS ONE	2013	8	9			Costa Rica	NA	10.41	-84.03	Isthmian-Atlantic moist forests	Tropical & Subtropical Moist Broadleaf Forests	Neotropic	no
19	Ahumada, Jorge A.; Silva, Carlos E. F.; Gajapersad, Krisna; Hallam, Chris; Hurtado, Johanna; Martin, Emanuel; McWilliam, Alex; Mugerwa, Badru; O'Brien, Tim; Rovero, Francesco; Sheil, Douglas; Spironello, Wilson R.; Winarni, Nurul; Andelman, Sandy J.	Community structure and diversity of tropical forest mammals: data from a global camera trap network	PHILOSOPHICAL TRANSACTIONS OF THE ROYAL SOCIETY B-BIOLOGICAL SCIENCES	2011	366	###	2703	2711	Uganda	Africa	-1.0805	29.6613	Albertine Rift montane forests	Tropical & Subtropical Moist Broadleaf Forests	Afrotropic	no
20	Ahumada, Jorge A.; Silva, Carlos E. F.; Gajapersad, Krisna; Hallam, Chris; Hurtado, Johanna; Martin, Emanuel; McWilliam, Alex; Mugerwa, Badru; O'Brien, Tim; Rovero, Francesco; Sheil, Douglas; Spironello, Wilson R.; Winarni, Nurul; Andelman, Sandy J.	Community structure and diversity of tropical forest mammals: data from a global camera trap network	PHILOSOPHICAL TRANSACTIONS OF THE ROYAL SOCIETY B-BIOLOGICAL SCIENCES	2011	366	###	2703	2711	Costa Rica	NA	10.3028	-84.0338	Isthmian-Atlantic moist forests	Tropical & Subtropical Moist Broadleaf Forests	Neotropic	no
21	Ahumada, Jorge A.; Silva, Carlos E. F.; Gajapersad, Krisna; Hallam, Chris; Hurtado, Johanna; Martin, Emanuel; McWilliam, Alex; Mugerwa, Badru; O'Brien, Tim; Rovero, Francesco; Sheil, Douglas; Spironello, Wilson R.; Winarni, Nurul; Andelman, Sandy J.	Community structure and diversity of tropical forest mammals: data from a global camera trap network	PHILOSOPHICAL TRANSACTIONS OF THE ROYAL SOCIETY B-BIOLOGICAL SCIENCES	2011	366	###	2703	2711	Indonesia	Asia	-5.25	104.167	Sumatran lowland rain forests	Tropical & Subtropical Moist Broadleaf Forests	Indomalayan	no
22	Ahumada, Jorge A.; Silva, Carlos E. F.; Gajapersad, Krisna; Hallam, Chris; Hurtado, Johanna; Martin, Emanuel; McWilliam, Alex; Mugerwa, Badru; O'Brien, Tim; Rovero, Francesco; Sheil, Douglas; Spironello, Wilson R.; Winarni, Nurul; Andelman, Sandy J.	Community structure and diversity of tropical forest mammals: data from a global camera trap network	PHILOSOPHICAL TRANSACTIONS OF THE ROYAL SOCIETY B-BIOLOGICAL SCIENCES	2011	366	###	2703	2711	Tanzania	Africa	-7.8425	36.8914	Eastern Arc forests	Tropical & Subtropical Moist Broadleaf Forests	Afrotropic	no
23	Ahumada, Jorge A.; Silva, Carlos E. F.; Gajapersad, Krisna; Hallam, Chris; Hurtado, Johanna; Martin, Emanuel; McWilliam, Alex; Mugerwa, Badru; O'Brien, Tim; Rovero, Francesco; Sheil, Douglas; Spironello, Wilson R.; Winarni, Nurul; Andelman, Sandy J.	Community structure and diversity of tropical forest mammals: data from a global camera trap network	PHILOSOPHICAL TRANSACTIONS OF THE ROYAL SOCIETY B-BIOLOGICAL SCIENCES	2011	366	###	2703	2711	Suriname	SA	4.7375	-56.1877	Guianan lowland moist forests	Tropical & Subtropical Moist Broadleaf Forests	Neotropic	no
24	Ahumada, Jorge A.; Silva, Carlos E. F.; Gajapersad, Krisna; Hallam, Chris; Hurtado, Johanna; Martin, Emanuel; McWilliam, Alex; Mugerwa, Badru; O'Brien, Tim; Rovero, Francesco; Sheil, Douglas; Spironello, Wilson R.; Winarni, Nurul; Andelman, Sandy J.	Community structure and diversity of tropical forest mammals: data from a global camera trap network	PHILOSOPHICAL TRANSACTIONS OF THE ROYAL SOCIETY B-BIOLOGICAL SCIENCES	2011	366	###	2703	2711	Lao PDR	Asia	18.3248	104.142	Northern Annamites rain forests	Tropical & Subtropical Moist Broadleaf Forests	Indomalayan	no
25	Ahumada, Jorge A.; Silva, Carlos E. F.; Gajapersad, Krisna; Hallam, Chris; Hurtado, Johanna; Martin, Emanuel; McWilliam, Alex; Mugerwa, Badru; O'Brien, Tim; Rovero, Francesco; Sheil, Douglas; Spironello, Wilson R.; Winarni, Nurul; Andelman, Sandy J.	Community structure and diversity of tropical forest mammals: data from a global camera trap network	PHILOSOPHICAL TRANSACTIONS OF THE ROYAL SOCIETY B-BIOLOGICAL SCIENCES	2011	366	###	2703	2711	Brazil	SA	-2.929	-59.9764	Uatuma-Trombetas moist forests	Tropical & Subtropical Moist Broadleaf Forests	Neotropic	no
20	Ai Lianmin; Li Zengming; Ding Kai; Dahmer, Thomas D.	First photographic record of endemic brown eared-pheasant Crossoptilon mantchuricum by camera-trapping at Jinhuashan-Henglingzi Hemaji Nature Reserve, China.	Asian Journal of Conservation Biology	2017	6	2	81	87	China	Asia	39.74oN	115.28oE	Central China Loess Plateau mixed forests	Temperate Broadleaf & Mixed Forests	Palearctic	no
21	Aihara, Y.; Hosaka, T.; Yasuda, M.; Hashim, M.; Numata, S.	MAMMALIAN WILDLIFE TOURISM IN SOUTH-EAST ASIAN TROPICAL RAINFORESTS: THE CASE OF ENDAU ROMPIN NATIONAL PARK, MALAYSIA	JOURNAL OF TROPICAL FOREST SCIENCE	2016	28	2	167	181	Malaysia	Asia	2.545278 N	103.4 E	Peninsular Malaysian rain forests	Tropical & Subtropical Moist Broadleaf Forests	Indomalayan	no
22	Akbaba, Burak; Ayas, Zafer	Camera trap study on inventory and daily activity patterns of large mammals in a mixed forest in north-western Turkey	MAMMALIA	2012	76	1	43	48	Turkey	Europe	40.5953	32.5	Northern Anatolian conifer and deciduous forests	Temperate Conifer Forests	Palearctic	no
23	Akcali, Christopher K.; Adan Perez-Mendoza, Hibraim; Salazar-Valenzuela, David; Kikuchi, David W.; Guayasamin, Juan M.; Pfennig, David W.	Evaluating the utility of camera traps in field studies of predation	PEERJ	2019	7				USA	NA	34.7786	78.5333	Mid-Atlantic US coastal savannas	Temperate Grasslands, Savannas, and Shrublands	Nearctic	no
24	Al Hikmani, Hadi; Al Hikmani, Khalid M. Ali; Zaabanoot, Said; Al Shahari, Talal	First camera trap record of caracal kittens in Oman.	Cat News	2017	66		18	18	Oman	Asia	17.14	54.79	South Arabian fog woodlands, shrublands, and dune	Tropical & Subtropical Grasslands, Savannas, & Shrublands	Afrotropic	no
25	al Hikmani, Hadi; al Hikmani, Khalid	First photographic record of twin Arabian leopards in the wild.	Cat News	2014	60		15	15	Oman	Asia	17.14	54.79	South Arabian fog woodlands, shrublands, and dune	Tropical & Subtropical Grasslands, Savannas, & Shrublands	Afrotropic	no
26	Al Rashidi, Monif; Shobrak, Mohammed	Using a trail camera to record the breeding behaviour of Saunders's Tern on Farasan Island, Saudi Arabia.	Phoenix	2013	29		20	20	Saudi Arabia	Asia	16.75	42.09	Southwest Arabian coastal xeric shrublands	Deserts and Xeric Shrublands	Afrotropic	no
27	Albayrak, Irfan	ON SUS SCROFA (MAMMALIA: CHIROPTERA) IN TURKEY.	Munis Entomology & Zoology	2019	14	1	170	175	Turkey	Europe	40	33.82	Central Anatolian steppe and woodlands	Temperate Broadleaf & Mixed Forests	Palearctic
28	Albayrak, Irfan; Saricam, Tugba	ESTIMATING POPULATION SIZE OF BROWN HARE (LEPUS EUROPAEUS PALLAS, 1778) IN TURKEY	Munis Entomology & Zoology	2017	12	1	346	350	Turkey	Europe	40	33.82	Central Anatolian steppe and woodlands	Temperate Broadleaf & Mixed Forests	Palearctic	no
29	Alexander, Justine S.; Zhang, Chengcheng; Shi, Kun; Riordan, Philip	A granular view of a snow leopard population using camera traps in Central China	BIOLOGICAL CONSERVATION	2016	197		27	31	China	Asia	39.2619	100.85	Alashan Plateau semi-desert	Deserts and Xeric Shrublands	Palearctic	no
30	Alexander, Justine S.; Shi, Kun; Tallents, Lucy A.; Riordan, Philip	On the high trail: examining determinants of site use by the Endangered snow leopard Panthera uncia in Qilianshan, China	ORYX	2016	50	2	231	238	China	Asia	39	100	Alashan Plateau semi-desert	Deserts and Xeric Shrublands	Palearctic	no
31	Alexander, Justine S.; Cusack, Jeremy J.; Pengju, Chen; Kun, Shi; Riordan, Philip	Conservation of snow leopards: spill-over benefits for other carnivores?	ORYX	2016	50	2	239	243	China	Asia	39	100	Alashan Plateau semi-desert	Deserts and Xeric Shrublands	Palearctic	no
32	Alexander, Justine S.; Gopalaswamy, Arjun M.; Shi, Kun; Riordan, Philip	Face Value: Towards Robust Estimates of Snow Leopard Densities	PLOS ONE	2015	10	8			China	Asia	39	98	Alashan Plateau semi-desert	Deserts and Xeric Shrublands	Palearctic	no
33	Alexander, Peter D.; Gese, Eric M.	Identifying individual cougars (Puma concolor) in remote camera images - implications for population estimates	WILDLIFE RESEARCH	2018	45	3	274	281	USA	NA	43.61	-110.75	South Central Rockies forests	Temperate Conifer Forests	Nearctic	no
34	Allain, Steven J. R.	In the shadow of mammals: the use of camera traps to investigate the basking behaviour of Agama mwanzae in the Serengeti National Park, Tanzania	Herpetological Bulletin	2018		145	19	21	Tanzania	Africa	-2.35	34.82	Southern Acacia-Commiphora bushlands and thickets	Tropical & Subtropical Grasslands, Savannas, & Shrublands	Afrotropic	no
35	Alldredge, Mat W.; Blecha, Tasha; Lewis, Jonathan H.	Less invasive monitoring of cougars in colorado's front range	WILDLIFE SOCIETY BULLETIN	2019	43	2	222	230	USA	NA	39.97	-105.36	Colorado Rockies forests	Temperate Conifer Forests	Nearctic	yes
36	Allen, Benjamin L.; Behrendorff, Linda; Willsher, Lyn; Kaluza, Janina; Oakey, Jane	Recent invasion of European red foxes (Vulpes vulpes) on to Fraser Island (K'gari) and South Stradbroke Island	AUSTRAL ECOLOGY	2017	42	7	752	758	Australia	Australia	-27.8606	153.426	Eastern Australian temperate forest	Temperate Broadleaf & Mixed Forests	Australasia	no
37	Allen, Maximilian L.; Ward, Michael P.; Juznic, Damjan; Krofel, Miha	SCAVENGING BY OWLS: A GLOBAL REVIEW AND NEW OBSERVATIONS FROM EUROPE AND NORTH AMERICA	JOURNAL OF RAPTOR RESEARCH	2019	53	4	410	418	USA	NA	43.08	-89.43	Central US forest-grasslands transition	Temperate Grasslands, Savannas, and Shrublands	Nearctic	no
37	Allen, Maximilian L.; Ward, Michael P.; Juznic, Damjan; Krofel, Miha	SCAVENGING BY OWLS: A GLOBAL REVIEW AND NEW OBSERVATIONS FROM EUROPE AND NORTH AMERICA	JOURNAL OF RAPTOR RESEARCH	2019	53	4	410	418	Slovenia	Europe	45.65	14.81	Pannonian mixed forests	Temperate Broadleaf & Mixed Forests	Palearctic	no
38	Allen, Maximilian L.; Harris, Rachel E.; Olson, Lucas O.; Olson, Erik R.; Van Stappen, Julie; Van Deelen, Timothy R.	Resource limitations and competitive interactions affect carnivore community composition at different ecological scales in a temperate island system	MAMMALIA	2019	83	6	552	561	USA	NA	46.95	-90.85	Western Great Lakes forests	Temperate Broadleaf & Mixed Forests	Nearctic	no
39	Allen, Maximilian L.; Wojcik, Beth; Evans, Bryn E.; Iehl, Emily E.; Barker, Rachel E.; Wheeler, Michael E.; Peterson, Brittany E.; Dohm, Regan I.; Mueller, Marcus A.; Olson, Lucas O.; Ederer, Brittany; Stewart, Margaret; Crimmins, Shawn; Pemble, Ken; Van Stappen, Julie; Olson, Erik; Van Deelen, Timothy R.	Detection of Endangered American Martens (Martes americana) in Apostle Islands National Lakeshore, Wisconsin	AMERICAN MIDLAND NATURALIST	2018	179	2	294	298	USA	NA	46.9653	90.6642	Western Great Lakes forests	Temperate Broadleaf & Mixed Forests	Nearctic	no
40	Allen, Maximilian L.; Peterson, Brittany; Krofel, Miha	No respect for apex carnivores: Distribution and activity patterns of honey badgers in the Serengeti	MAMMALIAN BIOLOGY	2018	89		90	94	Tanzania	Africa	-2.35	34.82	Southern Acacia-Commiphora bushlands and thickets	Tropical & Subtropical Grasslands, Savannas, & Shrublands	Afrotropic	no
41	Allen, Maximilian L.; Elbroch, L. Mark; Wittmer, Heiko U.	Encounter Competition between a Cougar, Puma concolor, and a Western Spotted Skunk, Spilogale gracilis	Canadian Field-Naturalist	2013	127	1	64	66	USA	NA	39.7	122.9	Klamath-Siskiyou forests	Temperate Conifer Forests	Nearctic	no
42	Alonso, Robert S.; McClintock, Brett T.; Lyren, Lisa M.; Boydston, Erin E.; Crooks, Kevin R.	Mark-Recapture and Mark-Resight Methods for Estimating Abundance with Remote Cameras: A Carnivore Case Study	PLOS ONE	2015	10	3			USA	NA	33.6	-117.783	California coastal sage and chaparral	Mediterranean Forests, Woodlands, and Scrub	Nearctic	yes
43	Alonso, Robert S.; Lyren, Lisa M.; Boydston, Erin E.; Haas, Christopher D.; Crooks, Kevin R.	EVALUATION OF ROAD EXPANSION AND CONNECTIVITY MITIGATION FOR WILDLIFE IN SOUTHERN CALIFORNIA	SOUTHWESTERN NATURALIST	2014	59	2	181	187	USA	NA	33.6	-117.78	California coastal sage and chaparral	Mediterranean Forests, Woodlands, and Scrub	Nearctic	yes
44	AlRashidi, Monif; Shobrak, Mohammed	Incubation routine of Saunders's Tern Sternula saundersi in a harsh environment	AVIAN BIOLOGY RESEARCH	2015	8	2	113	116	Saudi Arabia	Asia	16.75	42.09	Southwest Arabian coastal xeric shrublands	Deserts and Xeric Shrublands	Afrotropic	no
45	Altendorf, KB; Laundre, JW; Gonzalez, CAL; Brown, JS	Assessing effects of predation risk on foraging behavior of mule deer	JOURNAL OF MAMMALOGY	2001	82	2	430	439	USA	NA	41.93	-113.03	Snake-Columbia shrub steppe	Deserts and Xeric Shrublands	Nearctic	no
46	Altwegg, Res; Nichols, James D.	Occupancy models for citizen-science data	METHODS IN ECOLOGY AND EVOLUTION	2019	10	1	8	21
47	Alvarenga, Guilherme Costa; Ramalho, Emiliano Esterci; Baccaro, Fabricio Beggiato; da Rocha, Daniel Gomes; Ferreira-Ferreira, Jefferson; Dineli Bobrowiec, Paulo Estefano	Spatial patterns of medium and large size mammal assemblages in varzea and terra firme forests, Central Amazonia, Brazil	PLOS ONE	2018	13	5			Brazil	SA	1.81667	64.75	Purus várzea	Tropical & Subtropical Moist Broadleaf Forests	Neotropic	no
48	Ambarli, Huseyin; Bilgin, C. Can	First record of a melanistic golden jackal (Canis aureus, Canidae) from Turkey	MAMMALIA	2013	77	2	219	222	Turkey	Europe	40.83	41.54	Caucasus mixed forests	Temperate Broadleaf & Mixed Forests	Palearctic	no
49	Ambarli, Huseyin; Mengulluoglu, Deniz; Bilgin, C. Can	First camera trap pictures of Eurasian lynx from Turkey.	Cat News	2010	52		32	32	Turkey	Europe	40.83	41.6	Caucasus mixed forests	Temperate Broadleaf & Mixed Forests	Palearctic	no
51	Amin, Rajan; Wacher, Tim; Clifford, Josef; Ogwoka, Bernard; Agwanda, Bernard Risky	ABUNDANCE, DISTRIBUTION, HABITAT, ACTIVITY AND CONSERVATION OF SOKOKE BUSHY-TAILED MONGOOSE BDEOGALE OMNIVORA IN CENTRAL AND NORTH COAST FORESTS OF KENYA	Journal of East African Natural History	2019	108	1	37	48	Kenya	Africa	1.53694	41.3256	Northern Swahili coastal forests	Tropical & Subtropical Moist Broadleaf Forests	Afrotropic	no
52	Amin, Rajan; Wacher, Tim; Bowkett, Andrew E.; Ogwoka, Bernard; Morris, Mike; Agwanda, Bernard R.	AFRICA'S FORGOTTEN FORESTS: THE CONSERVATION VALUE OF KENYA'S NORTHERN COASTAL FORESTS FOR LARGE MAMMALS	Journal of East African Natural History	2018	107	2	41	61	Kenya	Africa	1.53694	41.3256	Northern Swahili coastal forests	Tropical & Subtropical Moist Broadleaf Forests	Afrotropic	no
53	Amin, Rajan; Wacher, Tim; Butynski, Thomas M.	SYMPATRY AMONG THREE SUID SPECIES (FAMILY SUIDAE) ON THE NORTH COAST OF KENYA	Journal of East African Natural History	2017	106	2	67	78	Kenya	Africa	1.53694	41.3256	Northern Swahili coastal forests	Tropical & Subtropical Moist Broadleaf Forests	Afrotropic	no
54	Amin, Rajan; Agwanda, Bernard Risky; Ogwoka, Bernard; Wacher, Tim	STATUS AND BEHAVIOURAL ECOLOGY OF SENGIS IN THE BONI-DODORI AND ARABUKO-SOKOKE FORESTS, KENYA, DETERMINED BY CAMERA TRAPS	Journal of East African Natural History	2017	105	Part 2	223	235	Kenya	Africa	1.53694	41.3256	Northern Swahili coastal forests	Tropical & Subtropical Moist Broadleaf Forests	Afrotropic	no
55	Amin, Rajan; Andanje, Samuel A.; Ogwonka, Bernard; Ali, Abdullahi H.; Bowkett, Andrew E.; Omar, Mohamed; Wacher, Tim	The northern coastal forests of Kenya are nationally and globally important for the conservation of Aders' duiker Cephalophus adersi and other antelope species	BIODIVERSITY AND CONSERVATION	2015	24	3	641	658	Kenya	Africa	1.53694	41.3256	Northern Swahili coastal forests	Tropical & Subtropical Moist Broadleaf Forests	Afrotropic	no
58	Ampeng, A.; Shukor, M. N.; Sahibin, A. R.; Idris, W. M. R.; Ahmad, S.; Mohammad, H.; Madeline, G. P.; Ali, N.; Bujang, M.; Hashim, I.; Bujang, A.; Md-Zain, B. M.	Patterns of mineral lick use by Northwest Bornean orangutans (Pongo pygmaeus pygmaeus) in the Lanjak Entimau Wildlife Sanctuary, Sarawak, Malaysia	EUROPEAN JOURNAL OF WILDLIFE RESEARCH	2016	62	1	147	150	Borneo	Asia	1.4	112.16	Borneo lowland rain forests	Tropical & Subtropical Moist Broadleaf Forests	Indomalayan	no
59	An Nguyen; Van Bang Tran; Duc Minh Hoang; Thi Anh Minh Nguyen; Dinh Thang Nguyen; Van Tiep Tran; Long, Barney; Meijaard, Erik; Holland, Jeff; Wilting, Andreas; Tilker, Andrew	Camera-trap evidence that the silver-backed chevrotain Tragulus versicolor remains in the wild in Vietnam	NATURE ECOLOGY & EVOLUTION	2019	3	12	1650	1654	Vietnam	Asia	12.28	109.09	Southern Vietnam lowland dry forests	Tropical & Subtropical Dry Broadleaf Forests	Indomalayan	no
60	Andanje, Samuel A.; Bowkett, Andrew E.; Agwanda, Bernard Risky; Ngaruiya, Grace W.; Plowman, Amy B.; Wacher, Tim; Amin, Rajan	A new population of the Critically Endangered Aders' duiker Cephalophus adersi confirmed from northern coastal Kenya	ORYX	2011	45	3	444	447	Kenya	Africa	2.36667	40.5	Northern Swahili coastal forests	Tropical & Subtropical Moist Broadleaf Forests	Afrotropic	no
61	Anderson, T. Michael; White, Staci; Davis, Bryant; Erhardt, Rob; Palmer, Meredith; Swanson, Alexandra; Kosmala, Margaret; Packer, Craig	The spatial distribution of African savannah herbivores: species associations and habitat occupancy in a landscape context	PHILOSOPHICAL TRANSACTIONS OF THE ROYAL SOCIETY B-BIOLOGICAL SCIENCES	2016	371	###			Tanzania	Africa	-2.46	34.81	Southern Acacia-Commiphora bushlands and thickets	Tropical & Subtropical Grasslands, Savannas, & Shrublands	Afrotropic	no
63	Andrea Quiroga, Veronica; Noss, Andrew Jay; Ivan Boaglio, Gabriel; Santiago Di Bitetti, Mario	Local and continental determinants of giant anteater (Myrmecophaga tridactyla) abundance: Biome, human and jaguar roles in population regulation	MAMMALIAN BIOLOGY	2016	81	3	274	280	Argentina	SA	-24.98	-61.93	Dry Chaco	Tropical & Subtropical Grasslands, Savannas, & Shrublands	Neotropic	no
64	Andrea Quiroga, Veronica; Ivan Boaglio, Gabriel; Jay Noss, Andrew; Santiago Di Bitetti, Mario	Critical population status of the jaguar Panthera onca in the Argentine Chaco: camera-trap surveys suggest recent collapse and imminent regional extinction	ORYX	2014	48	1	141	148	Argentina	SA	-24.98	-61.93	Dry Chaco	Tropical & Subtropical Grasslands, Savannas, & Shrublands	Neotropic	no
65	Andresen, L.; Everatt, K. T.; Somers, M. J.	Use of site occupancy models for targeted monitoring of the cheetah	JOURNAL OF ZOOLOGY	2014	292	3	212	220	Mozambique	Africa	23.12	31.9	Zambezian mopane woodlands	Tropical & Subtropical Grasslands, Savannas, & Shrublands	Afrotropic	no
66	Angel Gomez-Ramirez, Miguel; Elizabeth Gutierrez-Gonzalez, Carmina; Alberto Lopez-Gonzalez, Carlos	Ocelots thrive in a non-typical habitat of northwestern Mexico	ENDANGERED SPECIES RESEARCH	2017	32		471	478	Mexico	NA	29.51	-108.78	Sonoran-Sinaloan subtropical dry forest	Tropical & Subtropical Dry Broadleaf Forests	Neartic	no
66	Angel Gomez-Ramirez, Miguel; Elizabeth Gutierrez-Gonzalez, Carmina; Alberto Lopez-Gonzalez, Carlos	Ocelots thrive in a non-typical habitat of northwestern Mexico	ENDANGERED SPECIES RESEARCH	2017	32		471	478	Mexico	NA	29.51	-108.78	Sierra Madre Occidental pine-oak forests	Tropical & Subtropical Coniferous Forests	Neartic
67	Angelici, Francesco M.; Rossi, Lorenzo	Further lion, Panthera leo senegalensis Meyer, 1826, sightings in Mole National Park, Ghana, and possible first serval Leptailurus serval Schreber, 1776 record after 39 years (Mammalia Felidae).	Biodiversity Journal	2017	8	2	749	752	Ghana	Africa	9.38	-1.8	West Sudanian savanna	Tropical & Subtropical Grasslands, Savannas, & Shrublands	Afrotropic	no
68	Angelici, Francesco M.; Di Vittorio, Massimiliano; Petrozzi, Fabio	New records of a threatened lion population (Panthera leo) in a West African national park	AFRICAN ZOOLOGY	2012	47	2	353	357	Ghana	Africa	9.38333	-1.85	West Sudanian savanna	Tropical & Subtropical Grasslands, Savannas, & Shrublands	Afrotropic	no
69	Anile, S.; Devillard, S.	Study design and body mass influence RAIs from camera trap studies: evidence from the Felidae	ANIMAL CONSERVATION	2016	19	1	35	45
70	Anile, S.; Amico, C.; Ragni, B.	POPULATION DENSITY ESTIMATION OF THE EUROPEAN WILDCAT (FELIS SILVESTRIS SILVESTRIS) IN SICILY USING CAMERA TRAPPING.	Wildlife Biology in Practice	2012	8	1	1	12	Italy	Europe	37.74	15	South Apennine mixed montan forests	Mediterranean Forests, Woodlands & Scrub	Palearctic	no
71	Anile, S.; Bizzarri, L.; Ragni, B.	Estimation of European wildcat population size in Sicily (Italy) using camera trapping and capture-recapture analyses	ITALIAN JOURNAL OF ZOOLOGY	2010	77	2	241	246	Italy	Europe	489569	4176316	South Apennine mixed montan forests	Mediterranean Forests, Woodlands & Scrub	Palearctic	no
72	Anile, Stefano; Devillard, Sebastien; Ragni, Bernardino; Rovero, Francesco; Mattucci, Federica; Lo Valvo, Mario	Habitat fragmentation and anthropogenic factors affect wildcat Felis silvestris silvestris occupancy and detectability on Mt Etna	WILDLIFE BIOLOGY	2019					Italy	Europe	37.716667 N	15 E	South Apennine mixed montan forests	Mediterranean Forests, Woodlands & Scrub	Palearctic	no
74	Anile, Stefano; Arrabito, Carmelo; Mazzamuto, Maria Vittoria; Scornavacca, Davide; Ragni, Bernardino	A non-invasive monitoring on European wildcat (Felis silvestris silvestris Schreber, 1777) in Sicily using hair trapping and camera trapping: does scented lure work?	HYSTRIX-ITALIAN JOURNAL OF MAMMALOGY	2012	23	2	44	49	Italy	Europe	493127	4176420	South Apennine mixed montan forests	Mediterranean Forests, Woodlands & Scrub	Palearctic	no
75	Anonymous	Survey Captures First-Ever Photos of Endangered Jentink's Duiker in Sierra Leone's Western Area.	Gnusletter	2012	30	2	9	10	Sierra Leone	Africa	8.31	-13.15	Western Guinean lowland forests	Tropical & Subtropical Moist Broadleaf Forests	Afrotropic	no
76	Anonymous	Record jaguar number counted in rainforest.	Cat News	2011	55	1	46	47	Bolivia	SA	-13.67	-68.74	Bolivian Yungas	Tropical & Subtropical Moist Broadleaf Forests	Neotropic	no
77	Anton, Victor; Hartley, Stephen; Geldenhuis, Andre; Wittmer, Heiko U.	Monitoring the mammalian fauna of urban areas using remote cameras and citizen science	Journal of Urban Ecology	2018	4	1	juy002	Article No.: juy002	New Zealand	Zealandia	-41.25	174.78	New Zealand North Island temperate forests	Temperate Broadleaf & Mixed Forests	Australasia	yes
78	Anton, Victor; Hartley, Stephen; Wittmer, Heiko U.	Evaluation of remote cameras for monitoring multiple invasive mammals in New Zealand	NEW ZEALAND JOURNAL OF ECOLOGY	2018	42	1	74	79	New Zealand	Zealandia	-41.25	174.78	New Zealand North Island temperate forests	Temperate Broadleaf & Mixed Forests	Australasia	yes
79	Antonio De la Torre, J.; Rivero, Marina; Camacho, Gamaliel; Arturo Alvarez-Marquez, Luis; Medellin, Rodrigo A.	First assessment of the conservation status of the jaguar Panthera onca in the Sierra Madre de Chiapas, Mexico	ORYX	2019	53	1	192	195	Mexico	NA	15.55	-92.76	Central American pine-oak forests	Tropical & Subtropical Coniferous Forests	Neotropic	no
80	Antonio de la Torre, J.; Rivero, Marina; Camacho, Gamaliel; Arturo Alvarez-Marquez, Luis	Assessing occupancy and habitat connectivity for Baird's tapir to establish conservation priorities in the Sierra Madre de Chiapas, Mexico	JOURNAL FOR NATURE CONSERVATION	2018	41		16	25	Mexico	NA	15.55	-92.76	Central American pine-oak forests	Tropical & Subtropical Coniferous Forests	Neotropic	no
80	Antonio de la Torre, J.; Rivero, Marina; Camacho, Gamaliel; Arturo Alvarez-Marquez, Luis	Assessing occupancy and habitat connectivity for Baird's tapir to establish conservation priorities in the Sierra Madre de Chiapas, Mexico	JOURNAL FOR NATURE CONSERVATION	2018	41		16	25	Mexico	NA	15.55	-92.76	Sierra Madre Chiapas moist forests	Tropical & Subtropical Moist Broadleaf Forests	Neotropic
81	Anwar, Meraj; Hasan, Dabeer; Vattakavan, Joseph	Rusty-spotted cat in Katerniaghat Wildlife Sanctuary, Uttar Pradesh State, India.	Cat News	2012	56		12	13	India	Asia	28.25	81.23	Terai-Duar savanna and grasslands	Tropical & Subtropical Grasslands, Savannas, & Shrublands	Indomalayan	no
82	Apps, Peter; McNutt, John	How camera traps work and how to work them	AFRICAN JOURNAL OF ECOLOGY	2018	56	4	702	709
83	Apps, Peter; McNutt, John	Are camera traps fit for purpose? A rigorous, reproducible and realistic test of camera trap performance	AFRICAN JOURNAL OF ECOLOGY	2018	56	4	710	720
84	Apps, Peter; Rafiq, Kasim; McNutt, J. Weldon	Camera-trap records of groups of ten and eleven Honey Badgers Mellivora capensis in northern Botswana	Small Carnivore Conservation	2018	56		9	11	Botswana	Africa	19.616667 S	23.6333	Zambezian flooded grasslands	Flooded Grasslands & Savannas	Afrotropic	no
86	Arena, G.; Symes, C. T.; Witkowski, E. T. F.	Neighbourhood effects on reproductive success in the endangered montane Aloe peglerae	SOUTH AFRICAN JOURNAL OF BOTANY	2013	86		144	144	South Africa	Africa
87	Ariefiandy, Achmad; Purwandana, Deni; Seno, Aganto; Ciofi, Claudio; Jessop, Tim S.	Can Camera Traps Monitor Komodo Dragons a Large Ectothermic Predator?	PLOS ONE	2013	8	3			Indonesia	Asia	-8.7	119.44	Lesser Sundas deciduous forests	Tropical & Subtropical Dry Broadleaf Forests	Australasia	no
88	Arispe, Rosario; Rumiz, Damian; Noss, Andrew J.	Six species of cats registered by camera trap surveys of tropical dry forest in Bolivia.	Cat News	2007	46		36	38	Bolivia	SA	17.0833	61.7833	Chiquitano dry forests	Tropical & Subtropical Dry Broadleaf Forests	Neotropic	no
90	Aronsen, Gary P.	New photographic evidence of the African golden cat (Profelis aurata Temminck) at Mainaro, Kibale National Park, Uganda	AFRICAN JOURNAL OF ECOLOGY	2010	48	2	541	545	Uganda	Africa	00°21?35?N	30°23?18?E	Albertine Rift montane forests	Tropical & Subtropical Moist Broadleaf Forests	Afrotropic	no
91	Arroyo-Arce, Stephanny; Thomson, Ian; Guy, Danny; Searcy, Amber	First confirmed record of margay in Tortuguero National Park, Costa Rica.	Cat News	2019	69		6	7	Costa Rica	NA	10.45	-83.51	Isthmian-Atlantic moist forests	Tropical & Subtropical Moist Broadleaf Forests	Neotropic	no
92	Arroyo-Arce, Stephanny; Thomson, Ian; Cutler, Kat; Wilmott, Stephanie	Feeding habits of the jaguar Panthera onca (Carnivora: Felidae) in Tortuguero National Park, Costa Rica	REVISTA DE BIOLOGIA TROPICAL	2018	66	1	70	77	Costa Rica	NA	10.54111 N	-83.5022	Mesoamerican Gulf-Caribbean mangroves	Mangroves	Neotropic	yes
93	Arroyo-Arce, Stephanny; Thomson, Ian; Fernández, Carlos; Salom-Pérez, Roberto	Relative abundance and activity patterns of terrestrial mammals in Pacuare Nature Reserve, Costa Rica	Cuadernos de Investigación UNED	2017	9	1	15	21	Costa Rica	NA	10.45	-83.51	Isthmian-Atlantic moist forests	Tropical & Subtropical Moist Broadleaf Forests	Neotropic	no
94	Arroyo-Arce, Stephanny; Thomson, Ian; Salom-Pérez, Roberto	Relative abundance and activity patterns of terrestrial mammalian species in Barra del Colorado Wildlife Refuge, Costa Rica	Cuadernos de Investigación UNED	2016	8	2	131	137	Costa Rica	NA	10o 46’18’’ N	83o 35’56’’ W	Isthmian-Atlantic moist forests	Tropical & Subtropical Moist Broadleaf Forests	Neotropic	no
95	Arroyo-Arce, Stephanny; Thomson, Ian; Fernandez, Carlos; Salom-Perez, Roberto	First record of a marine turtle predated by a jaguar in Pacuare Nature Reserve, Costa Rica.	Cat News	2016	64		6	7	Costa Rica	NA	10.45	-83.51	Isthmian-Atlantic moist forests	Tropical & Subtropical Moist Broadleaf Forests	Neotropic	no
96	Arroyo-Arce, Stephanny; Guilder, James; Salom-Perez, Roberto	Habitat features influencing jaguar Panthera onca (Carnivora: Felidae) occupancy in Tortuguero National Park, Costa Rica	REVISTA DE BIOLOGIA TROPICAL	2014	62	4	1449	1458	Costa Rica	NA	10°32’28” N	83°30’08’’ W	Isthmian-Atlantic moist forests	Tropical & Subtropical Moist Broadleaf Forests	Neotropic	no
97	Asad, Muhammad; Waseem, Muhammad; Ross, James G.; Paterson, Adrian M.	The Un-Common Leopard: presence, distribution and abundance in Gallies and Murree Forest Division, Northern Pakistan	NATURE CONSERVATION-BULGARIA	2019		37	53	80	Pakistan	Asia	34°04'07"N	73°41'03"E	Himalayan subtropical pine forests	Tropical & Subtropical Coniferous Forests	Indomalayan	no
97	Asad, Muhammad; Waseem, Muhammad; Ross, James G.; Paterson, Adrian M.	The Un-Common Leopard: presence, distribution and abundance in Gallies and Murree Forest Division, Northern Pakistan	NATURE CONSERVATION-BULGARIA	2019		37	53	80	Pakistan	Asia	35°01'10.70"N	72°08'50.93"E	Western Himalayan subalpine conifer forests	Temperate Conifer Forests	Indomalayan
97	Asad, Muhammad; Waseem, Muhammad; Ross, James G.; Paterson, Adrian M.	The Un-Common Leopard: presence, distribution and abundance in Gallies and Murree Forest Division, Northern Pakistan	NATURE CONSERVATION-BULGARIA	2019		37	53	80	Pakistan	Asia	35°51'11.19"N	72°50'30.46"E	Karakoram-West Tibetan Plateau alpine steppe	Montane Grasslands & Shrublands	Palearctic
101	Astete, S.; Marinho-Filho, J.; Kajin, M.; Penido, G.; Zimbres, B.; Sollmann, R.; Jacomo, A. T. A.; Torres, N. M.; Silveira, L.	Forced neighbours: Coexistence between jaguars and pumas in a harsh environment	JOURNAL OF ARID ENVIRONMENTS	2017	146		27	34	Brazil	SA	-8.72	-42.59	Caatinga	Tropical & Subtropical Dry Broadleaf Forests	Neotropic	no
101	Astete, S.; Marinho-Filho, J.; Kajin, M.; Penido, G.; Zimbres, B.; Sollmann, R.; Jacomo, A. T. A.; Torres, N. M.; Silveira, L.	Forced neighbours: Coexistence between jaguars and pumas in a harsh environment	JOURNAL OF ARID ENVIRONMENTS	2017	146		27	34	Brazil	SA	-8.72	-42.59	Brazilian Atlantic dry forests	Tropical & Subtropical Dry Broadleaf Forests	Neotropic
102	Astete, Samuel; Marinho-Filho, Jader; Machado, Ricardo B.; Zimbres, Barbara; Jacomo, Anah T. A.; Sollmann, Rahel; Torres, Natalia M.; Silveira, Leandro	Living in extreme environments: modeling habitat suitability for jaguars, pumas, and their prey in a semiarid habitat	JOURNAL OF MAMMALOGY	2017	98	2	464	474	Brazil	SA	-8.72	-42.59	Caatinga	Tropical & Subtropical Dry Broadleaf Forests	Neotropic	no
102	Astete, Samuel; Marinho-Filho, Jader; Machado, Ricardo B.; Zimbres, Barbara; Jacomo, Anah T. A.; Sollmann, Rahel; Torres, Natalia M.; Silveira, Leandro	Living in extreme environments: modeling habitat suitability for jaguars, pumas, and their prey in a semiarid habitat	JOURNAL OF MAMMALOGY	2017	98	2	464	474	Brazil	SA	-8.72	-42.59	Brazilian Atlantic dry forests	Tropical & Subtropical Dry Broadleaf Forests	Neotropic
103	Attum, Omar; Rosenbarger, Dasynda; Al Awaji, Malik; Kramer, Andrew; Eid, Ehab	Population size and artificial waterhole use by striped hyenas in the Dana Biosphere Reserve, Jordan	MAMMALIA	2017	81	4	415	419	Jordan	Asia	30.6887° N	35.58327° E	Eastern Mediterranean conifer-broadleaf forests	Mediterranean Forests, Woodlands, & Scrub	Paleartic	no
104	Augustine, Ben C.; Royle, J. Andrew; Murphy, Sean M.; Chandler, Richard B.; Cox, John J.; Kelly, Marcella J.	Spatial capture-recapture for categorically marked populations with an application to genetic capture-recapture	ECOSPHERE	2019	10	4
105	Austin, Caitlin; Tuft, Katherine; Ramp, Daniel; Cremona, Teigan; Webb, Jonathan K.	Bait preference for remote camera trap studies of the endangered northern quoll (Dasyurus hallucatus)	AUSTRALIAN MAMMALOGY	2017	39	1	72	77	Australia	Australia	17.5333	126.217	Kimberly tropical savanna	Tropical & Subtropical Grasslands, Savannas, & Shrublands	Australasia	no
106	Avgan, Batur; Zimmermann, Fridolin; Guentert, Marcel; Arikan, Fehmi; Breitenmoser, Urs	The first density estimation of an isolated Eurasian lynx population in southwest Asia	WILDLIFE BIOLOGY	2014	20	4	217	221	Turkey	Europe	36°31?N	29°49?E	Southern Anatolian montane conifer and deciduous forests	Mediterranean Forests, Woodlands, & Scrub	Palearctic	no
107	Awais, Muhammad; Mahmood, Tario.; Iftikhar-Uz-Zamman; Waseem, Muhammad	First camera trap photos of leopard in the Galiat Forests of Abbottabad, Pakistan.	Cat News	2017	65		31	31	Pakistan	Asia	34°5'1.68'' N	73°20'56.4'' E)	Western Himalayan broadleafe forests	Temperate Broadleaf & Mixed Forests	Indomalayan	no
109	Azad, MAJBA	Mammal diversity and conservation in a secondary forest in Peninsular Malaysia	BIODIVERSITY AND CONSERVATION	2006	15	3	1013	1025	Malaysia	Asia	4.93333	103.1	Peninsular Malayasian rain forests	Tropical & Subtropical Moist Broadleaf Forests	Indomalayan	no
110	Azevedo, Fernanda Cavalcanti; Lemos, Frederico Gemesio; Rocha, Daniel Gomes; Costa, Alan Nilo; Freitas-Junior, Mozart Caetano	NEW-RECORD OF THE BUSH DOG Speothos venaticus IN A HUMAN-ALTERED LANDSCAPE IN THE WEST OF MINAS GERAIS, BRAZIL	BIOSCIENCE JOURNAL	2016	32	5	1324	1330	Brazil	SA	18°46'S	48°14'W	Cerrado	Tropical & Subtropical Grasslands, Savannas, & Shrublands	Neotropic	yes
112	Azizah, Hidayati; Hani, Maulita Sari; Mambrasar, Ronal	ID THE MANTA : MANTA SIGHTINGS IN MANTA SANDY - RAJA AMPAT, WEST PAPUA-INDONESIA	JURNAL ILMU DAN TEKNOLOGI KELAUTAN TROPIS	2019	11	1	117	122	Indonesia	Asia	-0.82	130.88	Ocean	Aquatic	Australasia	no
113	Azlan, JM; Sharma, DSK	The diversity and activity patterns of wild felids in a secondary forest in Peninsular Malaysia	ORYX	2006	40	1	36	41	Malaysia	Asia	4°55.5’N	103°5.7’E	Peninsular Malayasian rain forests	Tropical & Subtropical Moist Broadleaf Forests	Indomalayan	yes
114	Bacon, Michelle M.; Boyce, Mark S.	Scavenging of an Elk, Cervus elaphus, Carcass by Multiple Cougars, Puma concolor, in Southeastern Alberta	CANADIAN FIELD-NATURALIST	2010	124	3	242	245	Canada	NA	49°40'N	110°15'W	Canadian Aspen forests and parklans	Temperate Grasslands, Savannas, & Shrublands	Nearctic	no
116	Baha-El-Din, Laila; Henschel, Philipp; Aba'a, Rostand; Abernethy, Kate; Bohm, Torsten; Bout, Nicolas; Coad, Lauren; Head, Josephine; Inoue, Eiji; Lahm, Sally; Lee, Michelle E.; Maisels, Fiona; Rabanal, Luisa; Starkey, Malcolm; Taylor, Gemma; Vanthome, Hadrien; Nakashima, Yoshihiro; Hunter, Luke	Notes on the distribution and status of small carnivores in Gabon	Small Carnivore Conservation	2013	48		19	29	Gabon	Africa	-1.17	10.74	Congolian coastal forests	Tropical & Subtropical Moist Broadleaf Forests	Afrotropic	no
116	Baha-El-Din, Laila; Henschel, Philipp; Aba'a, Rostand; Abernethy, Kate; Bohm, Torsten; Bout, Nicolas; Coad, Lauren; Head, Josephine; Inoue, Eiji; Lahm, Sally; Lee, Michelle E.; Maisels, Fiona; Rabanal, Luisa; Starkey, Malcolm; Taylor, Gemma; Vanthome, Hadrien; Nakashima, Yoshihiro; Hunter, Luke	Notes on the distribution and status of small carnivores in Gabon	Small Carnivore Conservation	2013	48		19	29	Gabon	Africa	-1.17	10.74	Western Congolian forest-savanna	Tropical & Subtropical Grasslands, Savannas, & Shrublands	Afrotropic
116	Baha-El-Din, Laila; Henschel, Philipp; Aba'a, Rostand; Abernethy, Kate; Bohm, Torsten; Bout, Nicolas; Coad, Lauren; Head, Josephine; Inoue, Eiji; Lahm, Sally; Lee, Michelle E.; Maisels, Fiona; Rabanal, Luisa; Starkey, Malcolm; Taylor, Gemma; Vanthome, Hadrien; Nakashima, Yoshihiro; Hunter, Luke	Notes on the distribution and status of small carnivores in Gabon	Small Carnivore Conservation	2013	48		19	29	Gabon	Africa	-1.17	10.74	Northwest Congolian lowland forests	Tropical & Subtropical Moist Broadleaf Forests	Afrotropic
117	Bahaa-el-Din, Laila; Sollmann, Rahel; Hunter, Luke T. B.; Slotow, Rob; Macdonald, David W.; Henschel, Philipp	Effects of human land-use on Africa's only forest-dependent fetid: The African golden cat Caracal aurata	BIOLOGICAL CONSERVATION	2016	199		1	9	Gabon	Africa	-0.49	11.53	Congolian coastal forests	Tropical & Subtropical Moist Broadleaf Forests	Afrotropic	no
117	Bahaa-el-Din, Laila; Sollmann, Rahel; Hunter, Luke T. B.; Slotow, Rob; Macdonald, David W.; Henschel, Philipp	Effects of human land-use on Africa's only forest-dependent fetid: The African golden cat Caracal aurata	BIOLOGICAL CONSERVATION	2016	199		1	9	Gabon	Africa	-0.49	11.53	Western Congolian forest-savanna	Tropical & Subtropical Grasslands, Savannas, & Shrublands	Afrotropic
117	Bahaa-el-Din, Laila; Sollmann, Rahel; Hunter, Luke T. B.; Slotow, Rob; Macdonald, David W.; Henschel, Philipp	Effects of human land-use on Africa's only forest-dependent fetid: The African golden cat Caracal aurata	BIOLOGICAL CONSERVATION	2016	199		1	9	Gabon	Africa	-0.49	11.53	Northwest Congolian lowland forests	Tropical & Subtropical Moist Broadleaf Forests	Afrotropic
118	Bahaa-el-din, Laila; Henschel, Philipp; Butynski, Thomas M.; Macdonald, David W.; Mills, David; Slotow, Rob; Hunter, Luke	The African golden cat Caracal aurata: Africa's least-known felid	MAMMAL REVIEW	2015	45	1	63	77	Gabon	Africa	-0.49	11.53	Congolian coastal forests	Tropical & Subtropical Moist Broadleaf Forests	Afrotropic	no
118	Bahaa-el-din, Laila; Henschel, Philipp; Butynski, Thomas M.; Macdonald, David W.; Mills, David; Slotow, Rob; Hunter, Luke	The African golden cat Caracal aurata: Africa's least-known felid	MAMMAL REVIEW	2015	45	1	63	77	Gabon	Africa	-0.49	11.53	Western Congolian forest-savanna	Tropical & Subtropical Grasslands, Savannas, & Shrublands	Afrotropic
118	Bahaa-el-din, Laila; Henschel, Philipp; Butynski, Thomas M.; Macdonald, David W.; Mills, David; Slotow, Rob; Hunter, Luke	The African golden cat Caracal aurata: Africa's least-known felid	MAMMAL REVIEW	2015	45	1	63	77	Gabon	Africa	-0.49	11.53	Northwest Congolian lowland forests	Tropical & Subtropical Moist Broadleaf Forests	Afrotropic
118	Bahaa-el-din, Laila; Henschel, Philipp; Butynski, Thomas M.; Macdonald, David W.; Mills, David; Slotow, Rob; Hunter, Luke	The African golden cat Caracal aurata: Africa's least-known felid	MAMMAL REVIEW	2015	45	1	63	77	Uganda	Africa	0.48	30.39	Albertine Rift montane forests	Tropical & Subtropical Moist Broadleaf Forests	Afrotropic
119	Bahaa-el-Din, Laila; Henschel, Philipp; Slotow, Rob; MacDonald, David W.; Hunter, Luke	Systematic survey efforts of the African golden cat - Part 1. Results from Gabon.	Cat News	2011	55	1	26	28	Gabon	Africa	-0.49	11.53	Western Congolian forest-savanna	Tropical & Subtropical Grasslands, Savannas, & Shrublands	Afrotropic	no
119	Bahaa-el-Din, Laila; Henschel, Philipp; Slotow, Rob; MacDonald, David W.; Hunter, Luke	Systematic survey efforts of the African golden cat - Part 1. Results from Gabon.	Cat News	2011	55	1	26	28	Uganda	Africa	0.48	30.39	Albertine Rift montane forests	Tropical & Subtropical Moist Broadleaf Forests	Afrotropic	no
120	Baker, Gretchen M.	QUANTIFYING WILDLIFE USE OF CAVE ENTRANCES USING REMOTE CAMERA TRAPS	JOURNAL OF CAVE AND KARST STUDIES	2015	77	3	200	210	USA	NA	39.02	-114.13	Great Basin montane forests	Temperate Conifer Forests	Neartic	no
122	Baker, M. C.; Mcshea, W. J.; Bhumpakpan, N.; Sukmasuang, R.; Sisuruk, N.; Siripattaranukul, K.; Howard, J. G.	A Spotted Linsang Prionodon pardicolor observation from eastern Thailand	Small Carnivore Conservation	2012	47		58	59	Thailand	Asia	14°07'24.24"N	102°30'29.88"E	Southeast Indochina dry evergreen	Tropical & Subtropical Dry Broadleaf Forests	Indomalayan	no
123	Balbuena, Diego; Alonso, Alfonso; Panta, Margot; Garcia, Alan; Gregory, Tremaine	Mitigating Tropical Forest Fragmentation with Natural and Semi-Artificial Canopy Bridges	DIVERSITY-BASEL	2019	11	4			Peru	SA	11?27’ S	73?18’ W	Southwest Amazon moist forests	Tropical & Subtropical Moist Broadleaf Forests	Neotropic	no
124	Balestrieri, Alessandro; Ruiz-Gonzalez, Aritz; Vergara, Maria; Capelli, Enrica; Tirozzi, Pietro; Alfino, Sara; Minuti, Gianmarco; Prigioni, Claudio; Saino, Nicola	Pine marten density in lowland riparian woods: A test of the Random Encounter Model based on genetic data	MAMMALIAN BIOLOGY	2016	81	5	439	446	Italy	Europe	45.27	8.95	Po Basin mixed forest	Temperate Broadleaf & Mixed Forests	Palearctic	yes
125	Balestrieri, Alessandro; Cardarelli, Elisa; Pandini, Michela; Remonti, Luigi; Saino, Nicola; Prigioni, Claudio	Spatial organisation of European badger (Meles meles) in northern Italy as assessed by camera-trapping	EUROPEAN JOURNAL OF WILDLIFE RESEARCH	2016	62	2	219	226	Italy	Europe	45° 11? N	9° 29? E	Po Basin mixed forest	Temperate Broadleaf & Mixed Forests	Palearctic	no
126	Balme, G.	Baited camera-trap surveys - Marginally more precise but at what cost? A response to du Preez et al. (2014)	BIOLOGICAL CONSERVATION	2014	179		144	145
127	Balme, Guy; Rogan, Matt; Thomas, Lisa; Pitman, Ross; Mann, Gareth; Whittington-Jones, Gareth; Midlane, Neil; Broodryk, Mark; Broodryk, Kerryn; Campbell, Michelle; Alkema, Marc; Wright, Dave; Hunter, Luke	Big cats at large: Density, structure, and spatio-temporal patterns of a leopard population free of anthropogenic mortality	POPULATION ECOLOGY	2019	61	3	256	267	South Africa	Africa	-24.93	31.52	Limpopo lowveld	Tropical & Subtropical Grasslands, Savannas, & Shrublands	Afrotropic	no
128	Balme, Guy A.; Slotow, Rob; Hunter, Luke T. B.	Impact of conservation interventions on the dynamics and persistence of a persecuted leopard (Panthera pardus) population	BIOLOGICAL CONSERVATION	2009	142	11	2681	2690	South Africa	Africa	27°44?–27°55?S	31°12?–32°26?E	Maputaland coastal forests and woodlands	Tropical & Subtropical Moist Broadleaf Forests	Afrotropic	no
129	Balme, Guy A.; Hunter, Luke T. B.; Slotow, Rob	Evaluating Methods for Counting Cryptic Carnivores	JOURNAL OF WILDLIFE MANAGEMENT	2009	73	3	433	441	South Africa	Africa	-27.89	32.21	Maputaland coastal forests and woodlands	Tropical & Subtropical Moist Broadleaf Forests	Afrotropic	no
130	Banks, Chris B.; Robertson, Peter; Magrath, Michael J. L.; Harley, Dan	Searching for the Grassland Earless Dragon &ITTympanocryptis pinguicolla&IT in western Victoria	Victorian Naturalist (Blackburn)	2017	134	6	187	198	Australia	Australia
131	Baral, Rishi; Gurung, Raj Bahadur; Gurung, Raj Kumar; Yadav, Shailendra Kumar; Ghimirey, Yadav	A leopard cat with its kittens camera trapped in Annapurna Conservation Area, Nepal.	Cat News	2019	69		32	33	Nepal	Asia	28°25.076' N	83°49.480' E	Eastern Himalayan subalpine conifer forests	Temperate Conifer Forests	Indomalayan	no
132	Barasona, J. A.; Vicente, J.; Diez-Delgado, I.; Aznar, J.; Gortazar, C.; Torres, M. J.	Environmental Presence of Mycobacterium tuberculosis Complex in Aggregation Points at the Wildlife/Livestock Interface	TRANSBOUNDARY AND EMERGING DISEASES	2017	64	4	1148	1158	Spain	Europe	37°13?N	6°40?W	Southwest Iberian Meditteranean sclerophyllus and mixed forests	Mediterranean Forests, Woodlands & Scrub	Palearctic	no
133	Barasona, J. A.; VerCauteren, K. C.; Saklou, N.; Gortazar, C.; Vicente, J.	Effectiveness of cattle operated bump gates and exclusion fences in preventing ungulate multi-host sanitary interaction	PREVENTIVE VETERINARY MEDICINE	2013	111	###	42	50	Spain	Europe	38.99	-3.95	Iberian sclerophyllous and semi-deciduous forests	Mediterranean Forests, Woodlands & Scrub	Palearctic	no
134	Barbosa, Lucineia; Franca, Isadora; Hernandez Ruz, Emil Jose	First records of Theobroma speciosum fruits dispersion.	Revista de la Academia Colombiana de Ciencias Exactas Fisicas y Naturales	2019	43	168	518	520	Brazil	SA	3?24’42.7’ S	51? 51’50.7’ W	Tapajós-Xingu moist forests	Tropical & Subtropical Moist Broadleaf Forests	Neotropic	no
135	Barbry, Thomas; Gallardo, Giovana	First camera trap photos of the Andean cat in the Sajama National Park and Natural Area of Integrated Management, Boliva [Bolivia].	Cat News	2006	44		23	23	Boliva	SA	-18.09	-68.87	Central Andean dry puna	Montane Grasslands & Shrublands	Neotropic	no
136	Barrett, Brendan J.; Monteza-Moreno, Claudio M.; Dogandzic, Tamara; Zwyns, Nicolas; Ibanez, Alicia; Crofoot, Margaret C.	Habitual stone-tool-aided extractive foraging in white-faced capuchins, Cebus capucinus	ROYAL SOCIETY OPEN SCIENCE	2018	5	8			Panama	NA	7.46	-81.77	Isthmian-Pacific moist forests	Tropical & Subtropical Moist Broadleaf Forests	Neotropic	no
136	Barrett, Brendan J.; Monteza-Moreno, Claudio M.; Dogandzic, Tamara; Zwyns, Nicolas; Ibanez, Alicia; Crofoot, Margaret C.	Habitual stone-tool-aided extractive foraging in white-faced capuchins, Cebus capucinus	ROYAL SOCIETY OPEN SCIENCE	2018	5	8			Panama	NA	7.46	-81.77	Southern Mesoamerican Pacific mangroves	Mangroves	Neotropic
137	Barrull, J.; Mate, I.; Ruiz-Olmo, J.; Casanovas, J. G.; Gosalbez, J.; Salicru, M.	Factors and mechanisms that explain coexistence in a Mediterranean carnivore assemblage: An integrated study based on camera trapping and diet	MAMMALIAN BIOLOGY	2014	79	2	123	131	Spain	Europe	41?22' N	0?56'N	Iberian sclerophyllous and semi-deciduous forests	Mediterranean Forests, Woodlands & Scrub	Palearctic	no
138	Bartlow, Andrew W.; Kachmar, Michael; Lichti, Nathanael; Swihart, Robert K.; Stratford, Jeffrey A.; Steele, Michael A.	Does multiple seed loading in Blue Jays result in selective dispersal of smaller acorns?	INTEGRATIVE ZOOLOGY	2011	6	3	235	243	USA	NA	41°08'N	E	Appalachian-Blue Ridge forests	Temperate Broadleaf & Mixed Forests	Nearctic	no
139	Basak, Krishnendu; Ahmed, Moiz; Suraj, M.; Sinha, Chiranjivi; Reddy, B. Vivekananda; Yadav, O.P.; Mondal, Krishnendu	First picture and temporal activity of rusty-spotted cat from Chhattisgarh, Central India.	Cat News	2018	67		27	28	India	Asia	20.4554	81.975	East Deccan moist deciduous forests	Tropical & Subtropical Moist Broadleaf Forests	Indomalayan	no
140	Bashir, Tawqir; Bhattacharya, Tapajit; Poudyal, Kamal; Sathyakumar, Sambandam	FIRST CAMERA TRAP RECORD OF RED PANDA AILURUS FULGENS (CUVIER, 1825) (MAMMALIA: CARNIVORA: AILURIDAE) FROM KHANGCHENDZONGA, SIKKIM, INDIA	Journal of Threatened Taxa	2019	11	8	14056	14061	India	Asia	27.6349	88.3289	Eastern Himalayan subalpine conifer forests	Temperate Conifer Forests	Indomalayan	no
140	Bashir, Tawqir; Bhattacharya, Tapajit; Poudyal, Kamal; Sathyakumar, Sambandam	FIRST CAMERA TRAP RECORD OF RED PANDA AILURUS FULGENS (CUVIER, 1825) (MAMMALIA: CARNIVORA: AILURIDAE) FROM KHANGCHENDZONGA, SIKKIM, INDIA	Journal of Threatened Taxa	2019	11	8	14056	14061	India	Asia	27.6349	88.3289	Rock and Ice			no
141	Bashir, Tawqir; Bhattacharya, Tapajit; Poudyal, Kamal; Roy, Manjari; Sathyakumar, Sambandam	Precarious status of the Endangered dhole Cuon alpinus in the high elevation Eastern Himalayan habitats of Khangchendzonga Biosphere Reserve, Sikkim, India	ORYX	2014	48	1	125	132	India	Asia	27.6349	88.3289	Eastern Himalayan subalpine conifer forests	Temperate Conifer Forests	Indomalayan	no
141	Bashir, Tawqir; Bhattacharya, Tapajit; Poudyal, Kamal; Roy, Manjari; Sathyakumar, Sambandam	Precarious status of the Endangered dhole Cuon alpinus in the high elevation Eastern Himalayan habitats of Khangchendzonga Biosphere Reserve, Sikkim, India	ORYX	2014	48	1	125	132	India	Asia	27.6349	88.3289	Rock and Ice			no
142	Bashir, Tawqir; Bhattacharya, Tapajit; Poudyal, Kamal; Sathyakumar, Sambandam; Qureshi, Qamar	Estimating leopard cat Prionailurus bengalensis densities using photographic captures and recaptures	WILDLIFE BIOLOGY	2013	19	4	462	472	India	Asia	27°30‘-27°55‘N	88°02‘-88°37‘E	Eastern Himalayan subalpine conifer forests	Temperate Conifer Forests	Indomalayan	no
142	Bashir, Tawqir; Bhattacharya, Tapajit; Poudyal, Kamal; Sathyakumar, Sambandam; Qureshi, Qamar	Estimating leopard cat Prionailurus bengalensis densities using photographic captures and recaptures	WILDLIFE BIOLOGY	2013	19	4	462	472	India	Asia	27°30‘-27°55‘N	88°02‘-88°37‘E	Rock and Ice			no
143	Bassi, Elena; Battocchio, Daniele; Marcon, Andrea; Stahlberg, Sophie; Apollonio, Marco	Scavenging on ungulate carcasses in a mountain forest area in Northern Italy	MAMMAL STUDY	2018	43	1	33	43	Italy	Europe	43°48?N	11°49?E	Appenine deciduous montane forests	Temperate Broadleaf & Mixed Forests	Palearctic	no
144	Bastos Neto, Omar Junqueira; Ribeiro de Oliveira, Elisa Girardi; de Souza, Danielle Paiva; Mello, Bruno Felipe; Simoes Amorim, Thiago Orion; Pedretti Gomes, Karla Cristina; Andriolo, Artur	Mammals of particular periurban forest fragment in Juiz de Fora, Minas Gerais, Brazil.	Revista Brasileira de Zoociencias	2009	11	3	269	276	Brazil	SA	-21.85	-43.34	Bahia interior forests	Tropical & Subtropical Moist Broadleaf Forests	Neotropic	no
146	Battocchio, Daniele; Iacolina, Laura; Canu, Antonio; Mori, Emiliano	How much does it cost to look like a pig in a wild boar group?	BEHAVIOURAL PROCESSES	2017	138		123	126	Italy	Europe	43.081°N	10.996°E	Italian sclerophyllous and semi-deciduous forests	Mediterranean Forests, Woodlands & Scrub	Palearctic	no
147	Bauer, JW; Logan, KA; Sweanor, LL; Boyce, WM	Scavenging behavior in puma	SOUTHWESTERN NATURALIST	2005	50	4	466	471	USA	NA	32.93	-116.57	California montane chapparral and woodlands	Mediterranean Forests, Woodlands & Scrub	Nearctic	no
148	Beaudrot, Lydia; Acevedo, Miguel A.; Lessard, Jean-Philippe; Zvoleff, Alex; Jansen, Patrick A.; Sheil, Douglas; Rovero, Francesco; O'Brien, Timothy; Larney, Eileen; Fletcher, Christine; Andelman, Sandy; Ahumada, Jorge	Local temperature and ecological similarity drive distributional dynamics of tropical mammals worldwide	GLOBAL ECOLOGY AND BIOGEOGRAPHY	2019	28	7	976	991	Uganda	Africa	-1.03	29.64	Albertine Rift montane forests	Tropical & Subtropical Moist Broadleaf Forests	Afrotropic	no
148	Beaudrot, Lydia; Acevedo, Miguel A.; Lessard, Jean-Philippe; Zvoleff, Alex; Jansen, Patrick A.; Sheil, Douglas; Rovero, Francesco; O'Brien, Timothy; Larney, Eileen; Fletcher, Christine; Andelman, Sandy; Ahumada, Jorge	Local temperature and ecological similarity drive distributional dynamics of tropical mammals worldwide	GLOBAL ECOLOGY AND BIOGEOGRAPHY	2019	28	7	976	991	Lao People‘s Democratic Republic	Asia	18.39	104.24	Northern Annamites rain forests	Tropical & Subtropical Moist Broadleaf Forests	Indomalayan
148	Beaudrot, Lydia; Acevedo, Miguel A.; Lessard, Jean-Philippe; Zvoleff, Alex; Jansen, Patrick A.; Sheil, Douglas; Rovero, Francesco; O'Brien, Timothy; Larney, Eileen; Fletcher, Christine; Andelman, Sandy; Ahumada, Jorge	Local temperature and ecological similarity drive distributional dynamics of tropical mammals worldwide	GLOBAL ECOLOGY AND BIOGEOGRAPHY	2019	28	7	976	991	Malaysia	Asia	2.97	102.31	Peninsular Malaysian rain forests	Tropical & Subtropical Moist Broadleaf Forests	Indomalayan	no
148	Beaudrot, Lydia; Acevedo, Miguel A.; Lessard, Jean-Philippe; Zvoleff, Alex; Jansen, Patrick A.; Sheil, Douglas; Rovero, Francesco; O'Brien, Timothy; Larney, Eileen; Fletcher, Christine; Andelman, Sandy; Ahumada, Jorge	Local temperature and ecological similarity drive distributional dynamics of tropical mammals worldwide	GLOBAL ECOLOGY AND BIOGEOGRAPHY	2019	28	7	976	991	Madagascar	Africa	-21.26	47.45	Madagascar humid forests	Tropical & Subtropical Moist Broadleaf Forests	Afrotropic	no
148	Beaudrot, Lydia; Acevedo, Miguel A.; Lessard, Jean-Philippe; Zvoleff, Alex; Jansen, Patrick A.; Sheil, Douglas; Rovero, Francesco; O'Brien, Timothy; Larney, Eileen; Fletcher, Christine; Andelman, Sandy; Ahumada, Jorge	Local temperature and ecological similarity drive distributional dynamics of tropical mammals worldwide	GLOBAL ECOLOGY AND BIOGEOGRAPHY	2019	28	7	976	991	Tanzania	Africa	-7.78	36.73	Dry miombo woodlands	Tropical & Subtropical Grasslands, Savannas, & Shrublands	Afrotropic	no
148	Beaudrot, Lydia; Acevedo, Miguel A.; Lessard, Jean-Philippe; Zvoleff, Alex; Jansen, Patrick A.; Sheil, Douglas; Rovero, Francesco; O'Brien, Timothy; Larney, Eileen; Fletcher, Christine; Andelman, Sandy; Ahumada, Jorge	Local temperature and ecological similarity drive distributional dynamics of tropical mammals worldwide	GLOBAL ECOLOGY AND BIOGEOGRAPHY	2019	28	7	976	991	Costa Rica	NA	10.13	-84.1	Talamancan montane forests	Tropical & Subtropical Moist Broadleaf Forests	Neotropic	no
148	Beaudrot, Lydia; Acevedo, Miguel A.; Lessard, Jean-Philippe; Zvoleff, Alex; Jansen, Patrick A.; Sheil, Douglas; Rovero, Francesco; O'Brien, Timothy; Larney, Eileen; Fletcher, Christine; Andelman, Sandy; Ahumada, Jorge	Local temperature and ecological similarity drive distributional dynamics of tropical mammals worldwide	GLOBAL ECOLOGY AND BIOGEOGRAPHY	2019	28	7	976	991	Peru	SA	-10.38	-75.35	Ucayali moist forests	Tropical & Subtropical Moist Broadleaf Forests	Neotropic	no
149	Beaudrot, Lydia; Ahumada, Jorge; O'Brien, Timothy G.; Jansen, Patrick A.	Detecting tropical wildlife declines through camera-trap monitoring: an evaluation of the Tropical Ecology Assessment and Monitoring protocol	ORYX	2019	53	1	126	129	Panama	NA	9.15	-79.84	Isthmian-Atlantic moist forests	Tropical & Subtropical Moist Broadleaf Forests	Neotropic	no
149	Beaudrot, Lydia; Ahumada, Jorge; O'Brien, Timothy G.; Jansen, Patrick A.	Detecting tropical wildlife declines through camera-trap monitoring: an evaluation of the Tropical Ecology Assessment and Monitoring protocol	ORYX	2019	53	1	126	129	Brazil	SA	-1.82	-51.5	Xingu-Tocantins-Araguaia moist forests	Tropical & Subtropical Moist Broadleaf Forests	Neotropic
149	Beaudrot, Lydia; Ahumada, Jorge; O'Brien, Timothy G.; Jansen, Patrick A.	Detecting tropical wildlife declines through camera-trap monitoring: an evaluation of the Tropical Ecology Assessment and Monitoring protocol	ORYX	2019	53	1	126	129	Peru	SA	-11.89	-71.41	Southwest Amazon moist forests	Tropical & Subtropical Moist Broadleaf Forests	Neotropic	no
149	Beaudrot, Lydia; Ahumada, Jorge; O'Brien, Timothy G.; Jansen, Patrick A.	Detecting tropical wildlife declines through camera-trap monitoring: an evaluation of the Tropical Ecology Assessment and Monitoring protocol	ORYX	2019	53	1	126	129	Brazil	SA	-2.97	-59.92	Uatamã-Trombets moist forests	Tropical & Subtropical Moist Broadleaf Forests	Neotropic	no
149	Beaudrot, Lydia; Ahumada, Jorge; O'Brien, Timothy G.; Jansen, Patrick A.	Detecting tropical wildlife declines through camera-trap monitoring: an evaluation of the Tropical Ecology Assessment and Monitoring protocol	ORYX	2019	53	1	126	129	Costa Rica	NA	10.13	-84.1	Talamancan montane forests	Tropical & Subtropical Moist Broadleaf Forests	Neotropic	no
149	Beaudrot, Lydia; Ahumada, Jorge; O'Brien, Timothy G.; Jansen, Patrick A.	Detecting tropical wildlife declines through camera-trap monitoring: an evaluation of the Tropical Ecology Assessment and Monitoring protocol	ORYX	2019	53	1	126	129	Peru	SA	-10.38	-75.35	Ucayali moist forests	Tropical & Subtropical Moist Broadleaf Forests	Neotropic	no
149	Beaudrot, Lydia; Ahumada, Jorge; O'Brien, Timothy G.; Jansen, Patrick A.	Detecting tropical wildlife declines through camera-trap monitoring: an evaluation of the Tropical Ecology Assessment and Monitoring protocol	ORYX	2019	53	1	126	129	Ecuador	SA	-1.1	-75.81	Napo moist forests	Tropical & Subtropical Moist Broadleaf Forests	Neotropic	no
149	Beaudrot, Lydia; Ahumada, Jorge; O'Brien, Timothy G.; Jansen, Patrick A.	Detecting tropical wildlife declines through camera-trap monitoring: an evaluation of the Tropical Ecology Assessment and Monitoring protocol	ORYX	2019	53	1	126	129	Uganda	Africa	-1.03	29.64	Albertine Rift montane forests	Tropical & Subtropical Moist Broadleaf Forests	Afrotropic	no
149	Beaudrot, Lydia; Ahumada, Jorge; O'Brien, Timothy G.; Jansen, Patrick A.	Detecting tropical wildlife declines through camera-trap monitoring: an evaluation of the Tropical Ecology Assessment and Monitoring protocol	ORYX	2019	53	1	126	129	Cameroon	Africa	5.26	9.05	Cross-Sanaga-Bioko coastal forests	Tropical & Subtropical Moist Broadleaf Forests	Afrotropic	no
149	Beaudrot, Lydia; Ahumada, Jorge; O'Brien, Timothy G.; Jansen, Patrick A.	Detecting tropical wildlife declines through camera-trap monitoring: an evaluation of the Tropical Ecology Assessment and Monitoring protocol	ORYX	2019	53	1	126	129	Republic of Congo	Africa	2.57	16.63	Northwest Congolian lowland forests	Tropical & Subtropical Moist Broadleaf Forests	Afrotropic	no
149	Beaudrot, Lydia; Ahumada, Jorge; O'Brien, Timothy G.; Jansen, Patrick A.	Detecting tropical wildlife declines through camera-trap monitoring: an evaluation of the Tropical Ecology Assessment and Monitoring protocol	ORYX	2019	53	1	126	129	Tanzania	Africa	-7.78	36.73	Dry miombo woodlands	Tropical & Subtropical Grasslands, Savannas, & Shrublands	Afrotropic	no
149	Beaudrot, Lydia; Ahumada, Jorge; O'Brien, Timothy G.; Jansen, Patrick A.	Detecting tropical wildlife declines through camera-trap monitoring: an evaluation of the Tropical Ecology Assessment and Monitoring protocol	ORYX	2019	53	1	126	129	Indonesia	Asia	-5.45	104.35	Sumatran lowland rain forests	Tropical & Subtropical Moist Broadleaf Forests	Indomalayan	no
149	Beaudrot, Lydia; Ahumada, Jorge; O'Brien, Timothy G.; Jansen, Patrick A.	Detecting tropical wildlife declines through camera-trap monitoring: an evaluation of the Tropical Ecology Assessment and Monitoring protocol	ORYX	2019	53	1	126	129	Malaysia	Asia	2.97	102.31	Peninsular Malaysian rain forests	Tropical & Subtropical Moist Broadleaf Forests	Indomalayan	no
149	Beaudrot, Lydia; Ahumada, Jorge; O'Brien, Timothy G.; Jansen, Patrick A.	Detecting tropical wildlife declines through camera-trap monitoring: an evaluation of the Tropical Ecology Assessment and Monitoring protocol	ORYX	2019	53	1	126	129	Madagascar	Africa	-21.26	47.45	Madagascar humid forests	Tropical & Subtropical Moist Broadleaf Forests	Afrotropic	no
150	Beaudrot, Lydia; Acevedo, Miguel; Lessard, Jean-Philippe; Sheil, Douglas; Larney, Eileen; Wright, Patricia; Ahumada, Jorge	Distributional shifts in a biodiversity hotspot	BIOLOGICAL CONSERVATION	2018	228		252	258	Madagascar	Africa	47° 18?–47° 37? E	21° 02?–21° 25? S	Madagascar humid forests	Tropical & Subtropical Moist Broadleaf Forests	Afrotropic	no
151	Beaudrot, Lydia; Kroetz, Kailin; Alvarez-Loayza, Patricia; Amaral, Ieda; Breuer, Thomas; Fletcher, Christine; Jansen, Patrick A.; Kenfack, David; Moreira Lima, Marcela Guimaraes; Marshall, Andrew R.; Martin, Emanuel H.; Ndoundou-Hockemba, Mireile; O'Brien, Timothy; Razafimahaimodison, Jean Claude; Romero-Saltos, Hugo; Rovero, Francesco; Roy, Cisquet Hector; Sheil, Douglas; Silva, Carlos E. F.; Sp…	Limited carbon and biodiversity co-benefits for tropical forest mammals and birds	ECOLOGICAL APPLICATIONS	2016	26	4	1098	1111	Panama	NA	9.15	-79.84	Isthmian-Atlantic moist forests	Tropical & Subtropical Moist Broadleaf Forests	Neotropic	no
151	Beaudrot, Lydia; Kroetz, Kailin; Alvarez-Loayza, Patricia; Amaral, Ieda; Breuer, Thomas; Fletcher, Christine; Jansen, Patrick A.; Kenfack, David; Moreira Lima, Marcela Guimaraes; Marshall, Andrew R.; Martin, Emanuel H.; Ndoundou-Hockemba, Mireile; O'Brien, Timothy; Razafimahaimodison, Jean Claude; Romero-Saltos, Hugo; Rovero, Francesco; Roy, Cisquet Hector; Sheil, Douglas; Silva, Carlos E. F.; Sp…	Limited carbon and biodiversity co-benefits for tropical forest mammals and birds	ECOLOGICAL APPLICATIONS	2016	26	4	1098	1111	Brazil	SA	-1.82	-51.5	Xingu-Tocantins-Araguaia moist forests	Tropical & Subtropical Moist Broadleaf Forests	Neotropic	no
151	Beaudrot, Lydia; Kroetz, Kailin; Alvarez-Loayza, Patricia; Amaral, Ieda; Breuer, Thomas; Fletcher, Christine; Jansen, Patrick A.; Kenfack, David; Moreira Lima, Marcela Guimaraes; Marshall, Andrew R.; Martin, Emanuel H.; Ndoundou-Hockemba, Mireile; O'Brien, Timothy; Razafimahaimodison, Jean Claude; Romero-Saltos, Hugo; Rovero, Francesco; Roy, Cisquet Hector; Sheil, Douglas; Silva, Carlos E. F.; Sp…	Limited carbon and biodiversity co-benefits for tropical forest mammals and birds	ECOLOGICAL APPLICATIONS	2016	26	4	1098	1111	Peru	SA	-11.89	-71.41	Southwest Amazon moist forests	Tropical & Subtropical Moist Broadleaf Forests	Neotropic	no
151	Beaudrot, Lydia; Kroetz, Kailin; Alvarez-Loayza, Patricia; Amaral, Ieda; Breuer, Thomas; Fletcher, Christine; Jansen, Patrick A.; Kenfack, David; Moreira Lima, Marcela Guimaraes; Marshall, Andrew R.; Martin, Emanuel H.; Ndoundou-Hockemba, Mireile; O'Brien, Timothy; Razafimahaimodison, Jean Claude; Romero-Saltos, Hugo; Rovero, Francesco; Roy, Cisquet Hector; Sheil, Douglas; Silva, Carlos E. F.; Sp…	Limited carbon and biodiversity co-benefits for tropical forest mammals and birds	ECOLOGICAL APPLICATIONS	2016	26	4	1098	1111	Brazil	SA	-2.97	-59.92	Uatamã-Trombets moist forests	Tropical & Subtropical Moist Broadleaf Forests	Neotropic	no
151	Beaudrot, Lydia; Kroetz, Kailin; Alvarez-Loayza, Patricia; Amaral, Ieda; Breuer, Thomas; Fletcher, Christine; Jansen, Patrick A.; Kenfack, David; Moreira Lima, Marcela Guimaraes; Marshall, Andrew R.; Martin, Emanuel H.; Ndoundou-Hockemba, Mireile; O'Brien, Timothy; Razafimahaimodison, Jean Claude; Romero-Saltos, Hugo; Rovero, Francesco; Roy, Cisquet Hector; Sheil, Douglas; Silva, Carlos E. F.; Sp…	Limited carbon and biodiversity co-benefits for tropical forest mammals and birds	ECOLOGICAL APPLICATIONS	2016	26	4	1098	1111	Costa Rica	NA	10.13	-84.1	Talamancan montane forests	Tropical & Subtropical Moist Broadleaf Forests	Neotropic	no
151	Beaudrot, Lydia; Kroetz, Kailin; Alvarez-Loayza, Patricia; Amaral, Ieda; Breuer, Thomas; Fletcher, Christine; Jansen, Patrick A.; Kenfack, David; Moreira Lima, Marcela Guimaraes; Marshall, Andrew R.; Martin, Emanuel H.; Ndoundou-Hockemba, Mireile; O'Brien, Timothy; Razafimahaimodison, Jean Claude; Romero-Saltos, Hugo; Rovero, Francesco; Roy, Cisquet Hector; Sheil, Douglas; Silva, Carlos E. F.; Sp…	Limited carbon and biodiversity co-benefits for tropical forest mammals and birds	ECOLOGICAL APPLICATIONS	2016	26	4	1098	1111	Peru	SA	-10.38	-75.35	Ucayali moist forests	Tropical & Subtropical Moist Broadleaf Forests	Neotropic	no
151	Beaudrot, Lydia; Kroetz, Kailin; Alvarez-Loayza, Patricia; Amaral, Ieda; Breuer, Thomas; Fletcher, Christine; Jansen, Patrick A.; Kenfack, David; Moreira Lima, Marcela Guimaraes; Marshall, Andrew R.; Martin, Emanuel H.; Ndoundou-Hockemba, Mireile; O'Brien, Timothy; Razafimahaimodison, Jean Claude; Romero-Saltos, Hugo; Rovero, Francesco; Roy, Cisquet Hector; Sheil, Douglas; Silva, Carlos E. F.; Sp…	Limited carbon and biodiversity co-benefits for tropical forest mammals and birds	ECOLOGICAL APPLICATIONS	2016	26	4	1098	1111	Ecuador	SA	-1.1	-75.81	Napo moist forests	Tropical & Subtropical Moist Broadleaf Forests	Neotropic	no
151	Beaudrot, Lydia; Kroetz, Kailin; Alvarez-Loayza, Patricia; Amaral, Ieda; Breuer, Thomas; Fletcher, Christine; Jansen, Patrick A.; Kenfack, David; Moreira Lima, Marcela Guimaraes; Marshall, Andrew R.; Martin, Emanuel H.; Ndoundou-Hockemba, Mireile; O'Brien, Timothy; Razafimahaimodison, Jean Claude; Romero-Saltos, Hugo; Rovero, Francesco; Roy, Cisquet Hector; Sheil, Douglas; Silva, Carlos E. F.; Sp…	Limited carbon and biodiversity co-benefits for tropical forest mammals and birds	ECOLOGICAL APPLICATIONS	2016	26	4	1098	1111	Uganda	Africa	-1.03	29.64	Albertine Rift montane forests	Tropical & Subtropical Moist Broadleaf Forests	Afrotropic	no
151	Beaudrot, Lydia; Kroetz, Kailin; Alvarez-Loayza, Patricia; Amaral, Ieda; Breuer, Thomas; Fletcher, Christine; Jansen, Patrick A.; Kenfack, David; Moreira Lima, Marcela Guimaraes; Marshall, Andrew R.; Martin, Emanuel H.; Ndoundou-Hockemba, Mireile; O'Brien, Timothy; Razafimahaimodison, Jean Claude; Romero-Saltos, Hugo; Rovero, Francesco; Roy, Cisquet Hector; Sheil, Douglas; Silva, Carlos E. F.; Sp…	Limited carbon and biodiversity co-benefits for tropical forest mammals and birds	ECOLOGICAL APPLICATIONS	2016	26	4	1098	1111	Cameroon	Africa	5.26	9.05	Cross-Sanaga-Bioko coastal forests	Tropical & Subtropical Moist Broadleaf Forests	Afrotropic	no
151	Beaudrot, Lydia; Kroetz, Kailin; Alvarez-Loayza, Patricia; Amaral, Ieda; Breuer, Thomas; Fletcher, Christine; Jansen, Patrick A.; Kenfack, David; Moreira Lima, Marcela Guimaraes; Marshall, Andrew R.; Martin, Emanuel H.; Ndoundou-Hockemba, Mireile; O'Brien, Timothy; Razafimahaimodison, Jean Claude; Romero-Saltos, Hugo; Rovero, Francesco; Roy, Cisquet Hector; Sheil, Douglas; Silva, Carlos E. F.; Sp…	Limited carbon and biodiversity co-benefits for tropical forest mammals and birds	ECOLOGICAL APPLICATIONS	2016	26	4	1098	1111	Republic of Congo	Africa	2.57	16.63	Northwest Congolian lowland forests	Tropical & Subtropical Moist Broadleaf Forests	Afrotropic	no
151	Beaudrot, Lydia; Kroetz, Kailin; Alvarez-Loayza, Patricia; Amaral, Ieda; Breuer, Thomas; Fletcher, Christine; Jansen, Patrick A.; Kenfack, David; Moreira Lima, Marcela Guimaraes; Marshall, Andrew R.; Martin, Emanuel H.; Ndoundou-Hockemba, Mireile; O'Brien, Timothy; Razafimahaimodison, Jean Claude; Romero-Saltos, Hugo; Rovero, Francesco; Roy, Cisquet Hector; Sheil, Douglas; Silva, Carlos E. F.; Sp…	Limited carbon and biodiversity co-benefits for tropical forest mammals and birds	ECOLOGICAL APPLICATIONS	2016	26	4	1098	1111	Tanzania	Africa	-7.78	36.73	Dry miombo woodlands	Tropical & Subtropical Grasslands, Savannas, & Shrublands	Afrotropic	no
151	Beaudrot, Lydia; Kroetz, Kailin; Alvarez-Loayza, Patricia; Amaral, Ieda; Breuer, Thomas; Fletcher, Christine; Jansen, Patrick A.; Kenfack, David; Moreira Lima, Marcela Guimaraes; Marshall, Andrew R.; Martin, Emanuel H.; Ndoundou-Hockemba, Mireile; O'Brien, Timothy; Razafimahaimodison, Jean Claude; Romero-Saltos, Hugo; Rovero, Francesco; Roy, Cisquet Hector; Sheil, Douglas; Silva, Carlos E. F.; Sp…	Limited carbon and biodiversity co-benefits for tropical forest mammals and birds	ECOLOGICAL APPLICATIONS	2016	26	4	1098	1111	Indonesia	Asia	-5.45	104.35	Sumatran lowland rain forests	Tropical & Subtropical Moist Broadleaf Forests	Indomalayan	no
151	Beaudrot, Lydia; Kroetz, Kailin; Alvarez-Loayza, Patricia; Amaral, Ieda; Breuer, Thomas; Fletcher, Christine; Jansen, Patrick A.; Kenfack, David; Moreira Lima, Marcela Guimaraes; Marshall, Andrew R.; Martin, Emanuel H.; Ndoundou-Hockemba, Mireile; O'Brien, Timothy; Razafimahaimodison, Jean Claude; Romero-Saltos, Hugo; Rovero, Francesco; Roy, Cisquet Hector; Sheil, Douglas; Silva, Carlos E. F.; Sp…	Limited carbon and biodiversity co-benefits for tropical forest mammals and birds	ECOLOGICAL APPLICATIONS	2016	26	4	1098	1111	Malaysia	Asia	2.97	102.31	Peninsular Malaysian rain forests	Tropical & Subtropical Moist Broadleaf Forests	Indomalayan	no
151	Beaudrot, Lydia; Kroetz, Kailin; Alvarez-Loayza, Patricia; Amaral, Ieda; Breuer, Thomas; Fletcher, Christine; Jansen, Patrick A.; Kenfack, David; Moreira Lima, Marcela Guimaraes; Marshall, Andrew R.; Martin, Emanuel H.; Ndoundou-Hockemba, Mireile; O'Brien, Timothy; Razafimahaimodison, Jean Claude; Romero-Saltos, Hugo; Rovero, Francesco; Roy, Cisquet Hector; Sheil, Douglas; Silva, Carlos E. F.; Sp…	Limited carbon and biodiversity co-benefits for tropical forest mammals and birds	ECOLOGICAL APPLICATIONS	2016	26	4	1098	1111	Madagascar	Africa	-21.26	47.45	Madagascar humid forests	Tropical & Subtropical Moist Broadleaf Forests	Afrotropic	no
154	Behrendorff, Linda; Leung, Luke K. -P.; McKinnon, Allan; Hanger, Jon; Belonje, Grant; Tapply, Jenna; Jones, Darryl; Allen, Benjamin L.	Insects for breakfast and whales for dinner: the diet and body condition of dingoes on Fraser Island (K'gari)	SCIENTIFIC REPORTS	2016	6				Australia	Australia	24°42’ S	153 °15’ E	Eastern Australian temperate forests	Temperate Broadleaf & Mixed Forests	Australasia	no
155	Beirne, Christopher; Pillco-Huarcaya, Ruthmery; Jennifer Serrano-Rojas, Shirley; Whitworth, Andrew	Terrestrial camera traps: essential tool for the detection and future monitoring of the Critically Endangered Sira curassow Pauxi koepckeae	ENDANGERED SPECIES RESEARCH	2017	32		145	152	Peru	SA	09º 03'S	74º 05' W	Southwest Amazon moist forests	Tropical & Subtropical Moist Broadleaf Forests	Neotropics	no
156	Beisiegel, Beatriz M.	First camera trap record of bush dogs in the state of Sao Paulo, Brazil.	Canid News	2009	12	5	1	5	Brazil	SA	-24.17	-48	Alto Paraná Atlantic forests	Tropical & Subtropical Moist Broadleaf Forests	Neotropics	no
156	Beisiegel, Beatriz M.	First camera trap record of bush dogs in the state of Sao Paulo, Brazil.	Canid News	2009	12	5	1	5	Brazil	SA	-24.17	-48	Serra do Mar coastal forests	Tropical & Subtropical Moist Broadleaf Forests	Neotropics
157	Belant, Jerrold L.; Yancho, Stephen E.; Struthers, Kimberly S.	Does the cougar inhabit Sleeping Bear Dunes National Lakeshore?	NATURAL AREAS JOURNAL	2006	26	4	370	375	USA	NA	44o 77’ N	86o 05’ W	Upper Midwest US forest-savanna transiion	Temperate Broadleaf & Mixed Forests	Nearctic	no
158	Belbachir, Farid; Pettorelli, Nathalie; Wacher, Tim; Belbachir-Bazi, Amel; Durant, Sarah M.	Monitoring Rarity: The Critically Endangered Saharan Cheetah as a Flagship Species for a Threatened Ecosystem	PLOS ONE	2015	10	1			Algeria	Africa	23	6.13	West Saharan montane xeric woodlands	Deserts & Xeric Shrublands	Palearctic	no
159	Belcher, CA	Susceptibility of the tiger quoll, Dasyurus maculatus, and the eastern quoll, D-viverrinus, to 1080-poisoned baits in control programmes for vertebrate pests in eastern Australia	WILDLIFE RESEARCH	1998	25	1	33	40	Australia	Australia	-36.92	148.32	Southeast Australia temperate forests	Temperate Broadleaf & Mixed Forests	Australasia	no
160	Bellan, Steve E.; Gimenez, Olivier; Choquet, Remi; Getz, Wayne M.	A hierarchical distance sampling approach to estimating mortality rates from opportunistic carcass surveillance data	METHODS IN ECOLOGY AND EVOLUTION	2013	4	4	361	369	Namibia	Africa	-19.18	15.92	Etosha Pan halophytics	Flooded Grasslands & Savannas	Afrotropic	no
161	Bellis, Mark A.; Griffin, Curtice R.; Warren, Paige; Jackson, Scott D.	UTILIZING A MULTI-TECHNIQUE, MULTI-TAXA APPROACH TO MONITORING WILDLIFE PASSAGEWAYS IN SOUTHERN VERMONT.	Oecologia Australis	2013	17	1	111	128	USA	NA	42.88	-73.29	New England-Acadian forests	Temperate Broadleaf & Mixed Forests	Nearctic	yes
164	Beltrao, Mayara G.; Feijo, Anderson; Albuquerque, Anna Carolina F.; Freitas, Getulio L.; Rocha, Fabiana Lopes	Recording of relict ocelot (Leopardus pardalis) and South American coati (Nasua nasua) populations in the biodiversity hotspot Pernambuco Endemism Center, Northern Atlantic Forest, Brazil	MAMMALIA	2019	83	3	298	306	Brazil	SA	6°43?47.90?S	35°10?57.33?W	Pernambuco interior forests	Tropical & Subtropical Moist Broadleaf Forests	Neotropic	no
165	Bengsen, Andrew; Robinson, Rhett; Chaffey, Cameron; Gavenlock, Jason; Hornsby, Vanessa; Hurst, Rob; Fosdick, Mark	Camera trap surveys to evaluate pest animal control operations	ECOLOGICAL MANAGEMENT & RESTORATION	2014	15	1	97	100	Australia	Australia	32.0°S	148.9°E	Brigalow tropical savanna	Tropical & Subtropical Grasslands, Savannas & Shrublands	Australasia	no
166	Bengsen, Andrew	Effects of coordinated poison-baiting programs on survival and abundance in two red fox populations	WILDLIFE RESEARCH	2014	41	3	194	202	Australia	Australia	32.0°S	148.66	Brigalow tropical savanna	Tropical & Subtropical Grasslands, Savannas & Shrublands	Australasia	yes
167	Bengsen, Andrew; Butler, John; Masters, Pip	Estimating and indexing feral cat population abundances using camera traps	WILDLIFE RESEARCH	2011	38	8	732	739	Australia	Australia	35°48?S	137°58?E	Murray-Darling woodlands and mallee	Mediterranean Forests, Woodlands & Scrub	Australasia	no
168	Bengsen, Andrew J.; Leung, Luke K. -P.; Lapidge, Steven J.; Gordon, Iain J.	Using a General Index Approach to Analyze Camera-Trap Abundance Indices	JOURNAL OF WILDLIFE MANAGEMENT	2011	75	5	1222	1227	Australia	Australia	16° 01'S	145°27'E	Queensland tropical rain forests	Tropical & Subtropical Moist Broadleaf Forests	Australasia	no
169	Bennett, Daniel	The Use of an External Telemetric Device on Varanus olivaceus.	Biawak	2014	8	2	66	71	Philippines	Asia	14.74	121.95	Luzon rain forest	Tropical & Subtropical Moist Broadleaf Forests	Indomalayan	no
170	Berentsen, Are R.; Johnson, Shylo R.; VerCauteren, Kurt C.	Bait matrix flavor preference by mongoose (Herpestes auropunctatus) in Puerto Rico: Implications for Oral Rabies Vaccination	CARIBBEAN JOURNAL OF SCIENCE	2014	48	1	52	58	USA	NA	18.29	-65.79	Puerto Rican moist forests	Tropical & Subtropical Moist Broadleaf Forests	Neotropic	no
170	Berentsen, Are R.; Johnson, Shylo R.; VerCauteren, Kurt C.	Bait matrix flavor preference by mongoose (Herpestes auropunctatus) in Puerto Rico: Implications for Oral Rabies Vaccination	CARIBBEAN JOURNAL OF SCIENCE	2014	48	1	52	58	USA	NA	17.97	-67.17	Puerto Rican dry forests	Tropical & Subtropical Dry Broadleaf Forests	Neotropic	no
171	Bergos, Lucia; Grattarola, Florencia; Barreneche, Juan Manuel; Hernandez, Daniel; Gonzalez, Solana	Fogones de Fauna: An Experience of Participatory Monitoring of Wildlife in Rural Uruguay	SOCIETY & ANIMALS	2018	26	2	171	185	Uruguay	SA	-32.14	-53.73	Uruguayan savanna	Tropical & Subtropical Grasslands, Savannas & Shrublands	Neotropic	no
172	Bernard, Henry; Joseph, Nellcy; Baking, Esther Lonnie; Ean, Tung Siaw; Tachiki, Yasuyuki; Oram, Felicity; Seelan, Jaya Seelan Sathiya; Khan, Faisal Ali Anwarali	Animal use of rehabilitated formerly fire damaged peat-swamp forest in western Sabah, Malaysia	RAFFLES BULLETIN OF ZOOLOGY	2019	67		660	670	Malaysia	Asia	5°9?32?N	115°40?22?E	Borneo lowland rain forests	Tropical & Subtropical Moist Broadleaf Forests	Indomalayan	no
173	Bernard, Henry; Ahmad, Abdul Hamid; Brodie, Jedediah; Giordano, Anthony J.; Lakim, Maklarin; Amat, Rahimatsah; Hue, Sharon Koh Pei; Khee, Lee Shan; Tuuga, Augustine; Malim, Peter Titol; Lim-Hasegawa, Darline; Wai, Yap Sau; Sinun, Waidi	CAMERA-TRAPPING SURVEY OF MAMMALS IN AND AROUND IMBAK CANYON CONSERVATION AREA IN SABAH, MALAYSIAN BORNEO	RAFFLES BULLETIN OF ZOOLOGY	2013	61	2	861	870	Borneo	Asia	5°01'35.9"N	117°02'41.8"E	Borneo lowland rain forests	Tropical & Subtropical Moist Broadleaf Forests	Indomalayan	no
174	Berry, Lainie	Identifying nest-predator species in a southern Victorian woodland using remotely triggered cameras at artificial nests	Corella	2002	26	1	24	26	Australia	Australia	-38.17	145.18	Southeast Australia temperate forests	Temperate Broadleaf & Mixed Forests	Australasia	yes
175	Bersacola, Elena; Sastramidjaja, Wiwit; Rayadin, Yaya; Macdonald, David; Cheyne, Susan M.	Occupancy patterns of ungulates and pig-tailed macaques across regenerating and anthropogenic forests on Borneo	HYSTRIX-ITALIAN JOURNAL OF MAMMALOGY	2019	30	2	126	133	Borneo	Asia	-1.7	111.39	Borneo lowland rain forests	Tropical & Subtropical Moist Broadleaf Forests	Indomalayan	no
175	Bersacola, Elena; Sastramidjaja, Wiwit; Rayadin, Yaya; Macdonald, David; Cheyne, Susan M.	Occupancy patterns of ungulates and pig-tailed macaques across regenerating and anthropogenic forests on Borneo	HYSTRIX-ITALIAN JOURNAL OF MAMMALOGY	2019	30	2	126	133	Borneo	Asia	-1.7	111.39	Sundaland heath forests	Tropical & Subtropical Moist Broadleaf Forests	Indomalayan	no
175	Bersacola, Elena; Sastramidjaja, Wiwit; Rayadin, Yaya; Macdonald, David; Cheyne, Susan M.	Occupancy patterns of ungulates and pig-tailed macaques across regenerating and anthropogenic forests on Borneo	HYSTRIX-ITALIAN JOURNAL OF MAMMALOGY	2019	30	2	126	133	Borneo	Asia	-1.7	111.39	Borneo montane rain forests	Tropical & Subtropical Moist Broadleaf Forests	Indomalayan	no
176	Beutel, Tanja; Reineking, Bjoern; Tiesmeyer, Annika; Nowak, Carsten; Heurich, Marco	Spatial patterns of co-occurrence of the European wildcat Felis silvestris silvestris and domestic cats Felis silvestris catus in the Bavarian Forest National Park	WILDLIFE BIOLOGY	2017					Germany	Europe	48.95	13.39	Western European broadleaf forests	Temperate Broadleaf & Mixed Forests	Palearctic	no
177	Bezerra, B. M.; Bastos, M.; Souto, A.; Keasey, M. P.; Eason, P.; Schiel, N.; Jones, G.	Camera Trap Observations of Nonhabituated Critically Endangered Wild Blonde Capuchins, Sapajus flavius (Formerly Cebus flavius)	INTERNATIONAL JOURNAL OF PRIMATOLOGY	2014	35	5	895	907	Brazil	SA	-7.78	-35.01	Pernambuzo coastal forests	Tropical & Subtropical Moist Broadleaf Forests	Neotropic	no
178	Bhattacharya, Ankita; Chatterjee, Nilanjan; Angrish, Kunal; Shrotriya, Shivam; Sinha, Bitapi C.; Habib, Bilal	First photographic evidence of snow leopard from Lippa Asrang Wildlife Sanctuary, India.	Cat News	2019	69		17	18	India	Asia	31°39’6.48’’ N	78° 21’ 10.98‘’ E	Northwestern Himalayan alpine shrub and meadows	Montane Grasslands & Shrublands	Palearctic	no
179	Bhattacharya, Ankita; Habib, Bilal	Highest elevation record of tiger presence from India.	Cat News	2016	64		24	25	India	Asia	29.94	80.39	Western Himalayan broadleaf forests	Temperate Broadleaf & Mixed Forests	Indomalayan	no
180	Bhattacharya, Tapajit; Bashir, Tawqir; Poudyal, Kamal; Sathyakumar, Sambandam; Saha, Goutam Kumar	Distribution, occupancy and activity patterns of goral (Nemorhaedus goral) and serow (Capricornis thar) in Khangchendzonga Biosphere Reserve, Sikkim, India	MAMMAL STUDY	2012	37	3	173	181	India	Asia	27.51	88.22	Rock and ice			no
180	Bhattacharya, Tapajit; Bashir, Tawqir; Poudyal, Kamal; Sathyakumar, Sambandam; Saha, Goutam Kumar	Distribution, occupancy and activity patterns of goral (Nemorhaedus goral) and serow (Capricornis thar) in Khangchendzonga Biosphere Reserve, Sikkim, India	MAMMAL STUDY	2012	37	3	173	181	India	Asia	27.51	88.22	Eastern Himalayan alpine shrub and meadows	Montane Grasslands & Shrublands	Palearctic
180	Bhattacharya, Tapajit; Bashir, Tawqir; Poudyal, Kamal; Sathyakumar, Sambandam; Saha, Goutam Kumar	Distribution, occupancy and activity patterns of goral (Nemorhaedus goral) and serow (Capricornis thar) in Khangchendzonga Biosphere Reserve, Sikkim, India	MAMMAL STUDY	2012	37	3	173	181	India	Asia	27.51	88.22	Eastern Himalayan broadleaf forests	Temperate Broadleaf & Mixed Forests	Palearctic
182	Bianchi, R. de C.; Olifiers, N.; Gompper, M. E.; Mourao, G.	Niche partitioning among mesocarnivores in a Brazilian wetland.	PLoS ONE	2016	11	9	e0162893	e0162893	Brazil	SA	18° 59'S	56° 39'W	Pantanal	Flood Grasslands & Savannas	Neotropic	no
188	Bischof, R.; Ali, H.; Kabir, M.; Hameed, S.; Nawaz, M. A.	Being the underdog: an elusive small carnivore uses space with prey and time without enemies	JOURNAL OF ZOOLOGY	2014	293	1	40	48	Pakistan	Asia	36.86° N	75.11° E	Karakoram-West Tibetan Plateau alpine steppe	Montane Grasslands & Shrublands	Palearctic	no
189	Bischof, Richard; Hameed, Shoaib; Ali, Hussain; Kabir, Muhammad; Younas, Muhammad; Shah, Kursheed A.; Din, Jaffar U.; Nawaz, Muhammad A.	Using time-to-event analysis to complement hierarchical methods when assessing determinants of photographic detectability during camera trapping	METHODS IN ECOLOGY AND EVOLUTION	2014	5	1	44	53	Pakistan	Asia	36º 42? N	73º 59? E	Karakoram-West Tibetan Plateau alpine steppe	Montane Grasslands & Shrublands	Palearctic
191	Bisi, Francesco; Gagliardi, Alessandra; Cremonesi, Giacomo; Colombo, Roberto; Mazzamuto, Maria Vittoria; Wauters, Lucas Armand; Preatoni, Damiano Giovanni; Martinoli, Adriano	Distribution of Wildlife and Illegal Human Activities in the Lampi Marine National Park (Myanmar)	ENVIRONMENTAL CONSERVATION	2019	46	2	163	170	Myanmar	Asia	10° 50? N	98° 12? E	Tenasserim-South Thailand semi-evergreen rain forests	Tropical & Subtropical Moist Broadleaf Forests	Indomalayan	no
192	Bissessur, Prishnee; Bunsy, Yogishah; Baider, Claudia; Florens, Francois Benjamin Vincent	Non-intrusive systematic study reveals mutualistic interactions between threatened island endemic species and points to more impactful conservation	JOURNAL FOR NATURE CONSERVATION	2019	49		108	117	Mauritius	Africa	20°15' S	57° 35' E	Mascarene forests	Tropical & Subtropical Moist Broadleaf Forests	Afrotropic	no
193	Bista, Ashish; Chanchani, Pranav; Warrier, Rekha; Mann, Rohini; Gupta, Mudit; Vattakavan, Joseph	Detection of Large Indian Civet Viverra zibetha in camera-trap surveys in and around Dudhwa National Park in the Terai Region of North India	Small Carnivore Conservation	2012	47		54	57	India	Asia	28.59	80.41	Upper Gangetic Plains moist deciduous forests	Tropical & Subtropical Moist Broadleaf Forests	Indomalayan	no
193	Bista, Ashish; Chanchani, Pranav; Warrier, Rekha; Mann, Rohini; Gupta, Mudit; Vattakavan, Joseph	Detection of Large Indian Civet Viverra zibetha in camera-trap surveys in and around Dudhwa National Park in the Terai Region of North India	Small Carnivore Conservation	2012	47		54	57	India	Asia	28.59	80.41	Terai-Duar savanna and grasslands	Tropical & Subtropical Grasslands, Savannas & Shrublands	Indomalayan
194	Black, Caitlin E.; Mumby, Hannah S.; Henley, Michelle D.	Mining morphometrics and age from past survey photographs	FRONTIERS IN ZOOLOGY	2019	16				South Africa	Africa	24°15?23? S	31°13?1?	Limpopo lowveld	Tropical & Subtropical Grasslands, Savannas & Shrublands	Afrotropic	no
195	Blake, J. G.; Mosquera, D.; Salvador, J.	Use of mineral licks by mammals and birds in hunted and non-hunted areas of Yasuni National Park, Ecuador	ANIMAL CONSERVATION	2013	16	4	430	437	Ecuador	SA	0°37? S	76°10? W	Napo moist forests	Tropical & Subtropical Moist Broadleaf Forests	Neotropic	no
196	Blake, John G.; Loiselle, Bette A.	Annual and spatial variation in composition and activity of terrestrial mammals on two replicate plots in lowland forest of eastern Ecuador	PEERJ	2018	6				Ecuador	SA	0°37? S	76°10? W	Napo moist forests	Tropical & Subtropical Moist Broadleaf Forests	Neotropic	no
197	Blake, John G.; Mosquera, Diego; Oiselle, Bette A. L.; Wing, Kelly S.; Omo, David R.	Long-term variation in abundance of terrestrial mammals and birds in eastern Ecuador as measured by photographic rates and occupancy estimates	JOURNAL OF MAMMALOGY	2017	98	4	1168	1178	Ecuador	SA	0°37? S	76°10? W	Napo moist forests	Tropical & Subtropical Moist Broadleaf Forests	Neotropic	no
198	Blake, John G.; Mosquera, Diego; Loiselle, Bette A.; Romo, David; Swing, Kelly	Effects of human traffic on use of trails by mammals in lowland forest of eastern Ecuador	Neotropical Biodiversity	2017	3	1	57	64	Ecuador	SA	0°37? S	76°10? W	Napo moist forests	Tropical & Subtropical Moist Broadleaf Forests	Neotropic	no
199	Blake, John G.; Mosquera, Diego; Loiselle, Bette A.; Swing, Kelly; Guerra, Jaime; Romo, David	Spatial and temporal activity patterns of ocelots Leopardus pardalis in lowland forest of eastern Ecuador	JOURNAL OF MAMMALOGY	2016	97	2	455	463	Ecuador	SA	0°37? S	76°10? W	Napo moist forests	Tropical & Subtropical Moist Broadleaf Forests	Neotropic	no
200	Blake, John G.; Mosquera, Diego; Loiselle, Bette A.; Swing, Kelly; Guerra, Jaime; Romo, David	TEMPORAL ACTIVITY PATTERNS OF TERRESTRIAL MAMMALS IN LOWLAND RAINFOREST OF EASTERN ECUADOR	ECOTROPICA	2012	18	2	137	146	Ecuador	SA	0°37? S	76°10? W	Napo moist forests	Tropical & Subtropical Moist Broadleaf Forests	Neotropic	no
201	Blake, John G.; Guerra, Jaime; Mosquera, Diego; Torres, Rene; Loiselle, Bette A.; Romo, David	Use of Mineral Licks by White-Bellied Spider Monkeys (Ateles belzebuth) and Red Howler Monkeys (Alouatta seniculus) in Eastern Ecuador	INTERNATIONAL JOURNAL OF PRIMATOLOGY	2010	31	3	471	483	Ecuador	SA	0°37? S	76°10? W	Napo moist forests	Tropical & Subtropical Moist Broadleaf Forests	Neotropic	no
202	Blake, John G.; Mosquera, Diego; Guerra, Jaime; Romo, David	NEW LOCALITY RECORDS AND THE FIRST PHOTOGRAPHS OF LIVING ECHIMYS SATURNUS (DARK TREE RAT, ECHIMYIDAE) FROM EASTERN ECUADOR	ECOTROPICA	2010	16	2	141	144	Ecuador	SA	0°37? S	76°10? W	Napo moist forests	Tropical & Subtropical Moist Broadleaf Forests	Neotropic	no
203	Blecha, Kevin A.; Boone, Randall B.; Alldredge, Mathew W.	Hunger mediates apex predator's risk avoidance response in wildland-urban interface	JOURNAL OF ANIMAL ECOLOGY	2018	87	3	609	622	USA	NA	39.67	-105.52	Colorado Rockies forests	Temperate Conifer Forests	Nearctic	no
204	Bluff, Lucas A.; Clausen, Lucy; Hill, Amie; Bramwell, Michael D.	A decade of monitoring the remnant Victorian population of the brush-tailed rock-wallaby (Petrogale penicillata)	Australian Mammalogy	2011	33	2	195	201	Australia	Australia	37°50 S	148°190 E	Southeast Australia temperate forests	Temperate Broadleaf & Mixed Forests	Australasia	no
205	Boas Goulart, Fernando Vilas; Caceres, Nilton Carlos; Graipel, Mauricio Eduardo; Tortato, Marcos Adriano; Ghizoni, Ivo Rohling, Jr; Rodrigues Oliveira-Santos, Luiz Gustavo	Habitat selection by large mammals in a southern Brazilian Atlantic Forest.	Mammalian Biology	2009	74	3	184	192	Brazil	SA	-27.4308	-48.8503	Serra do Mar coastal forests	Tropical & Subtropical Moist Broadleaf Forests	Neotropic	no
206	Boast, Lorraine K.; Reeves, Harriet; Klein, Rebecca	Camera-trapping and capture-recapture models for estimating cheetah density.	Cat News	2015	62		34	37	Botsawna	Africa	-21.87	21.95	Kalahari zeric savanna	Deserts & Xeric Shrublands	Afrotropic	yes
207	Boesch, Christophe; Kalan, Ammie K.; Agbor, Anthony; Arandjelovic, Mimi; Dieguez, Paula; Lapeyre, Vincent; Kuehl, Hjalmar S.	Chimpanzees routinely fish for algae with tools during the dry season in Bakoun, Guinea	AMERICAN JOURNAL OF PRIMATOLOGY	2017	79	3			Guinea	Africa	11.9	-12.5	Guinean montane forests	Tropical & Subtropical Moist Broadleaf Forests	Afrotropic
209	Bogdan, Vlastimil; Junek, Tomas; Vymyslicka, Pavla Junkova	Temporal overlaps of feral cats with prey and competitors in primary and human-altered habitats on Bohol Island, Philippines	PEERJ	2016	4				Philippines	Asia	9.71	124.09	Mindanao-Eastern Visayas rain forests	Tropical & Subtropical Moist Broadleaf Forests	Indomalayan	yes
210	Bogoni, Juliano A.; Graipel, Mauricio E.; de Castilho, Pedro V.; Peroni, Nivaldo	Development of predatory behaviours in young southern tigrinas (Leopardus guttulus)	MAMMALIA	2017	81	4	421	424	Brazil	SA	-28.0011	-49.37	Araucaria moist forests	Tropical & Subtropical Moist Broadleaf Forests	Neotropic	no
211	Bogoni, Juliano Andre; Graipel, Mauricio Eduardo; de Castilho, Pedro Volkmer; Fantacini, Felipe Moreli; Kuhnen, Vanessa Villanova; Luiz, Micheli Ribeiro; Maccarini, Thiago Bernardes; Marcon, Cassio Batista; Pimentel Teixeira, Christiane de Souza; Tortato, Marcos Adriano; Vaz-de-Mello, Fernando Z.; Medina Hernandez, Malva Isabel	Contributions of the mammal community, habitat structure, and spatial distance to dung beetle community structure	BIODIVERSITY AND CONSERVATION	2016	25	9	1661	1675	Brazil	SA	27°35?S	48°55?W	Araucaria moist forests	Tropical & Subtropical Moist Broadleaf Forests	Neotropic	no
212	Bohina, O. D.; Boldyrev, V. A.	Influence of the Environment on the Structure of the European Badger (Meles meles) (Mustelidae, Mammalia) Family Groups on the Oka-Don Plain	BIOLOGY BULLETIN	2019	46	10	1364	1367	Russia	Europe	51.53	43.18	East European forest steppe	Temperate Broadleaf & Mixed Forests	Palearctic	no
213	Bohm, Torsten; Hofer, Heribert	Population numbers, density and activity patterns of servals in savannah patches of Odzala-Kokoua National Park, Republic of Congo	AFRICAN JOURNAL OF ECOLOGY	2018	56	4	841	849	Republic of Congo		1.28	14.84	Northwest Congolian lowland forests	Tropical & Subtropical Moist Broadleaf Forests	Afrotropic	no
214	Bohnett, Eve; Riordan, Philip; Kun, Shi	Initial Assessment on Large and Medium Sized Terrestrial Mammal Assemblage Using Camera Trapping in Nangunhe Nature Reserve in Yunnan, China.	Journal of Resources and Ecology	2015	6	5	331	344	China	Asia	99°0.00? E	23°15.00? N	Northern Indochina subtropical forests	Tropical & Subtropical Moist Broadleaf Forests	Indomalayan	no
215	Bolton, N. M.; van Oosterhout, C.; Collar, N. J.; Bell, D. J.	Population constraints on the Grenada Dove Leptotila wellsi: preliminary findings and proposals from south-west Grenada	BIRD CONSERVATION INTERNATIONAL	2016	26	2	205	213	Grenada	NA	12°00?N	61°44?W	Caribbean shrublands	Deserts & Xeric Shrublands	Neotropic	no
216	Borah, Jimmy; Sharma, Tridip; Das, Dhritiman; Rabha, Nilmani; Kakati, Niraj; Basumatary, Ajit; Ahmed, M. Firoz; Vattakaven, Joseph	Abundance and density estimates for common leopard Panthera pardus and clouded leopard Neofelis nebulosa in Manas National Park, Assam, India	ORYX	2014	48	1	149	155	India	Asia	26.65	91	Brahmaputra Valley semi-evergreen forests	Tropical & Subtropical Moist Broadleaf Forests	Indomalayan	no
217	Borchard, P.	USING CAMERA - TRAP DATA TO MODEL HABITAT USE BY WOMBATS AND CATTLE IN AUSTRALIAN RIPARIAN ECOSYSTEMS	APPLIED ECOLOGY AND ENVIRONMENTAL RESEARCH	2013	11	1	21	33	Australia	Australia	34°43’S	150°31’E	Eastern Australian temperate forests	Temperate Broadleaf & Mixed Forests	Australasia	no
218	Borchard, Philip; Wright, Ian A.	Using camera-trap data to model habitat use by bare-nosed wombats (Vombatus ursinus) and cattle (Bos taurus) in a south-eastern Australian agricultural riparian ecosystem	Australian Mammalogy	2010	32	1	16	22	Australia	Australia	34°43’S	150°31’E	Eastern Australian temperate forests	Temperate Broadleaf & Mixed Forests	Australasia	no
219	Borchers, David; Distiller, Greg; Foster, Rebecca; Harmsen, Bart; Milazzo, Lorenzo	Continuous-time spatially explicit capture-recapture models, with an application to a jaguar camera-trap survey	METHODS IN ECOLOGY AND EVOLUTION	2014	5	7	656	665	Belize	SA	16.78	-88.62	Petén-Veracruz moist forests	Tropical & Subtropical Moist Broadleaf Forests	Neotropic	no
220	Borges, Luiz H. M.; Calouro, Armando M.; de Sousa, Jesus R. D.	LARGE AND MEDIUM-SIZED MAMMALS FROM CHANDLESS STATE PARK, ACRE, BRAZIL	Mastozoologia Neotropical	2015	22	2	265	277	Brazil	SA	-9.93	-70.16	Southwest Amazon moist forests	Tropical & Subtropical Moist Broadleaf Forests	Neotropic	no
221	Boron, Valeria; Deere, Nicolas J.; Xofis, Panteleimon; Link, Andres; Quinones-Guerrero, Andres; Payan, Esteban; Tzanopoulos, Joseph	Richness, diversity, and factors influencing occupancy of mammal communities across human-modified landscapes in Colombia	BIOLOGICAL CONSERVATION	2019	232		108	116	Colombia	SA	7.3752	-73.8842	Magdalena-Urabá moist forests	Tropical & Subtropical Moist Broadleaf Forests	Neotropic	no
221	Boron, Valeria; Deere, Nicolas J.; Xofis, Panteleimon; Link, Andres; Quinones-Guerrero, Andres; Payan, Esteban; Tzanopoulos, Joseph	Richness, diversity, and factors influencing occupancy of mammal communities across human-modified landscapes in Colombia	BIOLOGICAL CONSERVATION	2019	232		108	116	Colombia	SA	7.3752	-73.8842	Cordillera Oriental montane forests	Tropical & Subtropical Moist Broadleaf Forests	Neotropic
222	Bosch, Stefan; Spiessl, Matthias; Mueller, Michael; Lurz, Peter W. W.; Haalboom, Thomas	Mechatronics meets biology: experiences and first results with a multipurpose small mammal monitoring unit used in red squirrel habitats	HYSTRIX-ITALIAN JOURNAL OF MAMMALOGY	2015	26	2	169	172	Germany	Europe	49.025	8.858	Western European broadleaf forests	Temperate Broadleaf & Mixed Forests	Palearctic	yes
222	Bosch, Stefan; Spiessl, Matthias; Mueller, Michael; Lurz, Peter W. W.; Haalboom, Thomas	Mechatronics meets biology: experiences and first results with a multipurpose small mammal monitoring unit used in red squirrel habitats	HYSTRIX-ITALIAN JOURNAL OF MAMMALOGY	2015	26	2	169	172	UK	Europe	55.595	-5.153	Celtic broadleaf forests	Temperate Broadleaf & Mixed Forests	Palearctic	no
222	Bosch, Stefan; Spiessl, Matthias; Mueller, Michael; Lurz, Peter W. W.; Haalboom, Thomas	Mechatronics meets biology: experiences and first results with a multipurpose small mammal monitoring unit used in red squirrel habitats	HYSTRIX-ITALIAN JOURNAL OF MAMMALOGY	2015	26	2	169	172	Switzerland	Europe	46.816	9.856	Alps conifer and mixed forests	Temperate Conifer Forests	Palearctic	no
223	Boser, C. L.; Cory, C.; Faulkner, K. R.; Randall, J. M.; Knapp, J. J.; Morrison, S. A.	Strategies for biosecurity on a nearshore island in California.	Monographs of the Western North American Naturalist	2014	7		412	420	USA	NA	34.01	-119.75	California coastal sage and chaparral	Mediterranean Forests, Woodlands & Scrub	Nearctic	no
225	Botelho, Andre Luis Moura; Borges, Luiz Henrique Medeiros; McFarland, Brian	Abundance and composition of the medium to large-sized mammals in a private area of a REDD plus project in Acre, Brazil	BIOTA NEOTROPICA	2018	18	3			Brazil	SA	-9.01	-69.46	Iquitos várzea	Tropical & Subtropical Moist Broadleaf Forests	Neotropic	no
227	Boulanger, Jason R.; Bigler, Laura L.; Curtis, Paul D.; Lein, Donald H.; Lembo, Arthur J., Jr.	A polyvinyl chloride bait station for dispensing rabies vaccine to raccoons in suburban landscapes	WILDLIFE SOCIETY BULLETIN	2006	34	4	1206	1211	USA	NA	42.74	-78.8	Eastern Great Lakes lowland forests	Temperate Broadleaf and Mixed Forests	Nearctic	yes
228	Boulerice, Jesse T.; Van Fleet, Laurie A.	A Novel Technique for Detecting Northern Flying Squirrels	WILDLIFE SOCIETY BULLETIN	2016	40	4	786	791	USA	NA	42°57?37?N	110°45?29?W	South Central Rockies forests	Temperate Conifer Forests	Nearctic	no
229	Bouros, G.; Ionescu, D. T.; Hodor, C.	OBSERVATION OF EURASIAN OTTER'S DIEL ACTIVITY USING CAMERA TRAPPING IN CENTRAL-EASTERN ROMANIA	Vestnik Zoologii	2019	53	1	47	56	Romania	Europe	27.342499 E	45.772777 N	Central European mixed forests	Temperate Broadleaf & Mixed Forests	Palearctic	no
230	Bowkett, Andrew E.; Rovero, Francesco; Marshall, Andrew R.	The use of camera-trap data to model habitat use by antelope species in the Udzungwa Mountain forests, Tanzania	AFRICAN JOURNAL OF ECOLOGY	2008	46	4	479	487	Tanzania	Afric	7°46?S	36°43?E	Dry miombo woodlands	Tropical & Subtropical Grasslands, Savannas, & Shrublands	Afrotropic	no
231	Bowler, Diana E.; Nilsen, Erlend B.; Bischof, Richard; O'Hara, Robert B.; Yu, Thin Thin; Oo, Tun; Aung, Myint; Linnell, John D. C.	Integrating data from different survey types for population monitoring of an endangered species: the case of the Eld's deer	SCIENTIFIC REPORTS	2019	9				Myanmar	Asia	N20°12?	E94°33?	Irrawaddy moist decidous forests	Tropical & Subtropical Moist Broadleaf Forests	Indomalayan	no
232	Boyer-Ontl, Kelly M.; Pruetz, Jill D.	Giving the Forest Eyes: The Benefits of Using Camera Traps to Study Unhabituated Chimpanzees (Pan troglodytes verus) in Southeastern Senegal	INTERNATIONAL JOURNAL OF PRIMATOLOGY	2014	35	5	881	894	Senegal	Africa	12° 54.513? N	11°32.115? W	West Sudanian savanna	Tropical & Subtropical Grasslands, Savannas, & Shrublands	Afrotropic	no
234	Braczkowski, Alexander; Watson, Laurence	Observations of leopard and caracal responses to novel scents in South Africa.	Cat News	2013	58		13	15	South Africa	Africa	-33.93	22.64	Knysna-Amatole montane forests	Tropical & Subtropical Moist Broadleaf Forests	Afrotropic	no
235	Braczkowski, Alexander; Watson, Laurence; Coulson, Damien; Randall, Rod	Diet of leopards in the southern Cape, South Africa	AFRICAN JOURNAL OF ECOLOGY	2012	50	3	377	380	South Africa	Africa	-33.93	22.64	Knysna-Amatole montane forests	Tropical & Subtropical Moist Broadleaf Forests	Afrotropic	no
236	Braczkowski, Alexander Richard; Balme, Guy Andrew; Dickman, Amy; Fattebert, Julien; Johnson, Paul; Dickerson, Tristan; Macdonald, David Whyte; Hunter, Luke	Scent Lure Effect on Camera-Trap Based Leopard Density Estimates	PLOS ONE	2016	11	4			South Africa	Africa	27° 51’ 30” S	32° 19’ 00” E	Maputaland coastal forests and woodlands	Tropical & Subtropical Moist Broadleaf Forests	Afrotropic	no
237	Braden, Anthony W.; Lopez, Roel R.; Roberts, Clay W.; Silvy, Nova J.; Owen, Catherine B.; Frank, Philip A.	Florida Key deer Odocoileus virginianus clavium underpass use and movements along a highway corridor	WILDLIFE BIOLOGY	2008	14	1	155	163	USA	NA	24.66	-81.34	Bahamian Antillean mangroves	Mangroves	Neotropic	yes
238	Branco, Paola S.; Merkle, Jerod A.; Pringle, Robert M.; King, Lucy; Tindall, Tosca; Stalmans, Marc; Long, Ryan A.	An experimental test of community-based strategies for mitigating human-wildlife conflict around protected areas	CONSERVATION LETTERS	2020	13	1			Mozambique	Africa	-18.82	34.5	Zambezian-Limpopo mixed woodlands	Tropical & Subtropical Grasslands, Savannas, & Shrublands	Afrotropic	yes
239	Brautigam, Kathryn J.; Osborne, Douglas C.; White, Don, Jr.	Photographic Evidence and Chronology of Nest Parasitism by a Wild Turkey (Meleagris gallopavo)	WILSON JOURNAL OF ORNITHOLOGY	2016	128	1	204	207	USA	NA	33.93	-91.83	Piney Woods	Temperate Conifer Forests	Nearctic	no
241	Brewster, Kyle; Henke, Scott E.; Hilton, Clay; Ortega-S, Alfonso, Jr.	Use of Remote Cameras to Monitor the Potential Prevalence of Sarcoptic Mange in Southern Texas, USA	JOURNAL OF WILDLIFE DISEASES	2017	53	2	377	381	USA	NA	26° 55'N	97° 42'E	Western Gulf coastal grasslands	Tropical & Subtropical Grasslands, Savannas, & Shrublands	Nearctic	no
242	Briceo-Mendez, Marcos; Naranjo, Eduardo J.; Altrichter, Mariana; Mandujano, Salvador	Availability of two species of fruits and their influence on the social structure of Tayassu pecari and Dicotyles tajacu	Therya	2017	8	3	193	198	Mexico	NA	18.6920°	-89.2511°	Yucatán moist forests	Tropical & Subtropical Moist Broadleaf Forests	Neotropic	no
244	Bridges, AS; Vaughan, MR; Klenzendorf, S	Seasonal variation in American black bear Ursus americanus activity patterns: quantification via remote photography	WILDLIFE BIOLOGY	2004	10	4	277	284	USA	NA	38.49	-79.13	Appalachian-Blue Ridge forests	Temperate Broadleaf & Mixed Forests	Nearctic	no
245	Bridges, AS; Fox, JA; Olfenbuttel, C; Vaughan, MR	American black bear denning behavior: observations and applications using remote photography	WILDLIFE SOCIETY BULLETIN	2004	32	1	188	193	USA	NA	38.49	-79.13	Appalachian-Blue Ridge forests	Temperate Broadleaf & Mixed Forests	Nearctic	no
246	Broadley, Kate; Burton, A. Cole; Avgar, Tal; Boutin, Stan	Density-dependent space use affects interpretation of camera trap detection rates	ECOLOGY AND EVOLUTION	2019	9	24	14031	14041
247	Brodie, Jedediah; Giordano, Anthony J.	Density of the Vulnerable Sunda clouded leopard Neofelis diardi in a protected area in Sabah, Malaysian Borneo	ORYX	2012	46	3	427	430	Borneo	Asia	4.78	116.87	Borneo montane rain forests	Tropical & Subtropical Moist Broadleaf Forests	Indomalayan	no
248	Brodie, Jedediah; Giordano, Anthony	Small carnivores of the Maliau Basin, Sabah, Borneo, including a new locality for Hose's Civet Diplogale hosei	Small Carnivore Conservation	2011	44		1	6	Borneo	Asia	4°49?N	116°54?E	Borneo montane rain forests	Tropical & Subtropical Moist Broadleaf Forests	Indomalayan	no
250	Brodie, Jedediah F.; Giordano, Anthony J.; Dickson, Brett G.; Hebblewhite, Mark; Bernard, Henry; Mohd-Azlan, Jayasilan; Anderson, Jesse; Ambu, Laurentius	Evaluating multispecies landscape connectivity in a threatened tropical mammal community	CONSERVATION BIOLOGY	2015	29	1	122	132	Indonesia	Asia	0.627	111.724	Borneo lowland rain forests	Tropical & Subtropical Moist Broadleaf Forests	Indomalayan	no
250	Brodie, Jedediah F.; Giordano, Anthony J.; Dickson, Brett G.; Hebblewhite, Mark; Bernard, Henry; Mohd-Azlan, Jayasilan; Anderson, Jesse; Ambu, Laurentius	Evaluating multispecies landscape connectivity in a threatened tropical mammal community	CONSERVATION BIOLOGY	2015	29	1	122	132	Brunei	Asia			Borneo montane rain forests	Tropical & Subtropical Moist Broadleaf Forests	Indomalayan
251	Brodie, Jedediah F.; Giordano, Anthony	Lack of trophic release with large mammal predators and prey in Borneo	BIOLOGICAL CONSERVATION	2013	163		58	67	Borneo	Asia	4.9	116.23	Borneo lowland rain forests	Tropical & Subtropical Moist Broadleaf Forests	Indomalayan	no
251	Brodie, Jedediah F.; Giordano, Anthony	Lack of trophic release with large mammal predators and prey in Borneo	BIOLOGICAL CONSERVATION	2013	163		58	67	Borneo	Asia	4.9	116.23	Borneo montane rain forests	Tropical & Subtropical Moist Broadleaf Forests	Indomalayan
252	Broeckhoven, Chris; Mouton, Pieter le Fras Nortier	Some Like It Hot: Camera Traps Unravel the Effects of Weather Conditions and Predator Presence on the Activity Levels of Two Lizards	PLOS ONE	2015	10	9			South Africa	Africa	-31.91	18.3	Fynbos shrubland	Mediterranean Forests, Woodlands & Scrub	Afrotropic	no
253	Broekhuis, Femke; O'Meara, Robert; O'Meara, Sarah; Barton, Michael; Harrell, Christopher; Western, Guy; Elliot, Nicholas	An assessment of mammals in Naimina Enkiyio Forest, Kenya	AFRICAN JOURNAL OF ECOLOGY	2018	56	4	755	758	Kenya	Africa	-1.74	35.92	East African montane forests	Tropical & Subtropical Moist Broadleaf Forests	Afrotropic	no
254	Bromen, Nicholas A.; French, Justin T.; Walker, John W.; Tomecek, John M.	Spatial relationships between livestock guardian dogs and mesocarnivores in central Texas	HUMAN-WILDLIFE INTERACTIONS	2019	13	1	29	41	USA	NA	30.92	-99.84	Edwards Plateau savanna	Temperate Grasslands, Savannas & Shrublands	Nearctic	no
255	Brook, Leila A.; Johnson, Christopher N.; Ritchie, Euan G.	Effects of predator control on behaviour of an apex predator and indirect consequences for mesopredator suppression	JOURNAL OF APPLIED ECOLOGY	2012	49	6	1278	1286	Australia	Australia	-25.999	141.79	Mitchell Grass Downs	Tropical & Subtropical Grasslands, Savannas & Shrublands	Australasia	no
255	Brook, Leila A.; Johnson, Christopher N.; Ritchie, Euan G.	Effects of predator control on behaviour of an apex predator and indirect consequences for mesopredator suppression	JOURNAL OF APPLIED ECOLOGY	2012	49	6	1278	1286	Australia	Australia			Simpson desert	Deserts & Xeric Shrublands	Australasia
255	Brook, Leila A.; Johnson, Christopher N.; Ritchie, Euan G.	Effects of predator control on behaviour of an apex predator and indirect consequences for mesopredator suppression	JOURNAL OF APPLIED ECOLOGY	2012	49	6	1278	1286	Australia	Australia			Einasleigh upland savanna	Tropical & Subtropical Grasslands, Savannas & Shrublands	Australasia
255	Brook, Leila A.; Johnson, Christopher N.; Ritchie, Euan G.	Effects of predator control on behaviour of an apex predator and indirect consequences for mesopredator suppression	JOURNAL OF APPLIED ECOLOGY	2012	49	6	1278	1286	Australia	Australia			Brigalow tropical savanna	Tropical & Subtropical Grasslands, Savannas & Shrublands	Australasia
255	Brook, Leila A.; Johnson, Christopher N.; Ritchie, Euan G.	Effects of predator control on behaviour of an apex predator and indirect consequences for mesopredator suppression	JOURNAL OF APPLIED ECOLOGY	2012	49	6	1278	1286	Australia	Australia			Cape York Peninsula tropical savanna	Tropical & Subtropical Grasslands, Savannas & Shrublands	Australasia
255	Brook, Leila A.; Johnson, Christopher N.; Ritchie, Euan G.	Effects of predator control on behaviour of an apex predator and indirect consequences for mesopredator suppression	JOURNAL OF APPLIED ECOLOGY	2012	49	6	1278	1286	Australia	Australia			Central Ranges xeric shrub	Deserts & Xeric Shrublands	Australasia
255	Brook, Leila A.; Johnson, Christopher N.; Ritchie, Euan G.	Effects of predator control on behaviour of an apex predator and indirect consequences for mesopredator suppression	JOURNAL OF APPLIED ECOLOGY	2012	49	6	1278	1286	Australia	Australia			Western Australi Mulga shrublands	Deserts & Xeric Shrublands	Australasia
256	Brooks, Daniel M.; Adul; Cheyne, Susan M.	A camera-trap survey of avifauna in a Bornean peat-swamp forest	WILSON JOURNAL OF ORNITHOLOGY	2018	130	4	969	980	Borneo	Asia	2°19?S	113°54?E	Borneo peat swamp forests	Tropical & Subtropical Moist Broadleaf Forests	Indomalayan	no
257	BROWDER, RG; BROWDER, RC; GARMAN, GC	AN INEXPENSIVE AND AUTOMATIC MULTIPLE-EXPOSURE PHOTOGRAPHIC SYSTEM	JOURNAL OF FIELD ORNITHOLOGY	1995	66	1	37	43
258	Brown, Alissa J.; Deutschman, Douglas H.; Braswell, Jessica; McLaughlin, Dana	Remote Cameras Reveal Experimental Artifact in a Study of Seed Predation in a Semi-Arid Shrubland	PLOS ONE	2016	11	10			USA	NA	32° 41 ‘N	116°52’ W	California coastal sage and chaparral	Mediterranean Forests, Woodlands & Scrub	Nearctic	no
259	Brozovic, Robert; Abrams, Jesse F.; Mohamed, Azlan; Wong, Seth T.; Niedballa, Juergen; Bhagwat, Tejas; Sollmann, Rahel; Mannan, Sam; Kissing, Johnny; Wilting, Andreas	Effects of forest degradation on the moonrat Echinosorex gymnura in Sabah, Malaysian Borneo	MAMMALIAN BIOLOGY	2018	93		135	143	Borneo	Asia	5°14'-28'N	117°19'-36'E	Borneo lowland rain forests	Tropical & Subtropical Moist Broadleaf Forests	Indomalayan	no
260	Bruce, Tom; Amin, Rajan; Wacher, Tim; Fankem, Oliver; Ndjassi, Constant; Bata, Madeleine; Fowler, Andrew; Ndinga, Hilaire; Olson, David	Using camera trap data to characterise terrestrial larger-bodied mammal communities in different management sectors of the Dja Faunal Reserve, Cameroon	AFRICAN JOURNAL OF ECOLOGY	2018	56	4	759	776	Cameroon	Africa	3°08?58.9?N	13°00?00.1?E	Northwest Congolian lowland forests	Tropical & Subtropical Moist Broadleaf Forests	Afrotropic	no
261	Bruce, Tom; Ndjassi, Constant; Lebreton, Matthew; Wacher, Tim; Fowler, Andrew; Mbobda, Roger Bruno Tabue; Olson, David	African golden cat and leopard persist in the Dja Faunal Reserve, Cameroon.	Cat News	2018	68		24	25	Cameroon	Africa	5°20' N	12° E	Northern Congolian Forest-Savanna	Tropical & Subtropical Grasslands, Savannas & Shrublands	Afrotropic	no
262	Bruce, Tom; Kamta, Romeo; Mbobda, Roger Bruno Tabue; Kanto, Stephane Talla; Djibrilla, Djibrilla; Moses, Ituka; Deblauwe, Vincent; Njabo, Kevin; LeBreton, Matthew; Ndjassi, Constant; Barichievy, Chris; Olson, David	Locating Giant Ground Pangolins (Smutsia gigantea) Using Camera Traps on Burrows in the Dja Biosphere Reserve, Cameroon	TROPICAL CONSERVATION SCIENCE	2018	11		1	5	Cameroon	Africa	3°11'27"N	12°48'41" E	Northwest Congolian lowland forests	Tropical & Subtropical Moist Broadleaf Forests	Afrotropic	no
264	Brzezinski, Marcin; Rodak, Lukasz; Zalewski, Andrzej	Reversed intraguild predation: red fox cubs killed by pine marten	ACTA THERIOLOGICA	2014	59	3	473	477	Poland	Europe	53° 49? N	21° 38? E	Central European mixed forests	Temperate Broadleaf & Mixed Forests	Palearctic	no
265	Bu, Hongliang; Wang, Fang; McShea, William J.; Lu, Zhi; Wang, Dajun; Li, Sheng	Spatial Co-Occurrence and Activity Patterns of Mesocarnivores in the Temperate Forests of Southwest China	PLOS ONE	2016	11	10			China	Asia	32.91	104.16	Southeast Tibet shrublands and meadows	Montane Grasslands & Shrublands	Palearctic	no
265	Bu, Hongliang; Wang, Fang; McShea, William J.; Lu, Zhi; Wang, Dajun; Li, Sheng	Spatial Co-Occurrence and Activity Patterns of Mesocarnivores in the Temperate Forests of Southwest China	PLOS ONE	2016	11	10			China	Asia	32.91	104.16	Qin Ling Mounains deciduous forests	Temperate Broadleaf & Mixed Forests	Palearctic
265	Bu, Hongliang; Wang, Fang; McShea, William J.; Lu, Zhi; Wang, Dajun; Li, Sheng	Spatial Co-Occurrence and Activity Patterns of Mesocarnivores in the Temperate Forests of Southwest China	PLOS ONE	2016	11	10			China	Asia	32.91	104.16	Daba Moutnains evergreen forests	Temperate Broadleaf & Mixed Forests	Palearctic
266	Bubnicki, Jakub W.; Churski, Marcin; Kuijper, Dries P. J.	TRAPPER: an open source web-based application to manage camera trapping projects	METHODS IN ECOLOGY AND EVOLUTION	2016	7	10	1209	1216
267	Bucci, Melanie E.; Krausman, Paul R.	A fortuitous mitigation for desert mule deer along the All-American Canal	CALIFORNIA FISH AND GAME	2015	101	3	165	177	USA	NA	32.7	-115.16	Sonoran desert	Deserts & Xeric Shrublands	Nearctic	yes
268	Burgar, Joanna M.; Burton, A. Cole; Fisher, Jason T.	The importance of considering multiple interacting species for conservation of species at risk	CONSERVATION BIOLOGY	2019	33	3	709	715	Canada	NA	55.71	-110.78	Mid-Canada Boreal Plains forests	Boreal Forests/Taiga	Nearctic	yes
269	Burgar, Joanna M.; Stewart, Frances E. C.; Volpe, John P.; Fisher, Jason T.; Burton, A. Cole	Estimating density for species conservation: Comparing camera trap spatial count models to genetic spatial capture-recapture models	GLOBAL ECOLOGY AND CONSERVATION	2018	15				Canada	NA	53.381 °N	113.063 °W	Canadian Aspen forests and parklands	Temperate Grasslands, Savannas & Shrublands	Nearctic	yes
270	Burkholder, Emily N.; Jakes, Andrew F.; Jones, Paul F.; Hebblewhite, Mark; Bishop, Chad J.	To Jump or Not to Jump: Mule Deer and White-Tailed Deer Fence Crossing Decisions	WILDLIFE SOCIETY BULLETIN	2018	42	3	420	429	Canada	NA	50°15?N	?111°10?W	Northern Shortgrass Prairie	Temperate Grasslands, Savannas & Shrublands	Nearctic	no
271	Burki, Simone; Roth, Tobias; Robin, Klaus; Weber, Darius	Lure sticks as a method to detect pine martens Martes martes	ACTA THERIOLOGICA	2010	55	3	223	230	Germany	Europe	47°44’N	7°49’E	Western European broadleaf forests	Temperate Broadleaf & Mixed Forests	Palearctic	no
272	Burton, A. Cole; Fisher, Jason T.; Adriaens, Peter; Treweek, Jo; Paetkau, David; Wikstrom, Marten; Callender, Andrew; Vardanyan, Ruben; Stepanyan, Armen	Density and distribution of a brown bear (Ursus arctos) population within the Caucasus biodiversity hotspot	JOURNAL OF MAMMALOGY	2018	99	5	1249	1260	Armenia	Asia	39.79	45.68	Caucus mixed forests	Temperate Broadleaf & Mixed Forests	Palearctic	no
274	Burton, A. Cole	Critical evaluation of a long-term, locally-based wildlife monitoring program in West Africa	BIODIVERSITY AND CONSERVATION	2012	21	12	3079	3094	Ghana	Africa	9.55	-1.82	West Sudanian savanna	Tropical & Subtropical Grasslands, Savannas, & Shrublands	Afrotropic	no
275	Burton, A. Cole; Sam, Moses K.; Balangtaa, Cletus; Brashares, Justin S.	Hierarchical Multi-Species Modeling of Carnivore Responses to Hunting, Habitat and Prey in a West African Protected Area	PLOS ONE	2012	7	5			Ghana	Africa	9°11'-10°06' N	01°22'-02°16' W	West Sudanian savanna	Tropical & Subtropical Grasslands, Savannas, & Shrublands	Afrotropic	no
276	Burton, A. Cole; Sam, Moses K.; Kpelle, David G.; Balangtaa, Cletus; Buedi, Eric B.; Brashares, Justin S.	Evaluating persistence and its predictors in a West African carnivore community	BIOLOGICAL CONSERVATION	2011	144	9	2344	2353	Ghana	Africa	9°11'-10°06' N	01°22'-02°16' W	West Sudanian savanna	Tropical & Subtropical Grasslands, Savannas, & Shrublands	Afrotropic	no
277	Burton, A. Cole; Buedi, Eric B.; Balangtaa, Cletus; Kpelle, David G.; Sam, Moses K.; Brashares, Justin S.	The decline of lions in Ghana's Mole National Park	AFRICAN JOURNAL OF ECOLOGY	2011	49	1	122	126	Ghana	Africa	9°11'-10°06' N	01°22'-02°16' W	West Sudanian savanna	Tropoical & Subtropical Grasslands, Savannas, & Shrublands	Afrotropic	no
278	Buschke, Falko T.	A camera trap survey of nocturnal mammals on former farmland in the eastern Free State Province, South Africa, 10 years after removing livestock	AFRICAN JOURNAL OF ECOLOGY	2016	54	4	514	518	South Africa	Africa	28.253°S	28.303°E	Highveld grasslands	Montane Grasslands & Shrublands	Afrotropic	no
279	Buzuleciu, Samuel A.; Crane, Derek P.; Parker, Scott L.	SCENT OF DISINTERRED SOIL AS AN OLFACTORY CUE USED BY RACCOONS TO LOCATE NESTS OF DIAMOND-BACKED TERRAPINS (MALACLEMYS TERRAPIN)	HERPETOLOGICAL CONSERVATION AND BIOLOGY	2016	11	3	539	551	USA	NA	33.35°N	79.20°W	Southeast US conifer savanna	Temperate Grasslands, Savannas & Shrublands	Neartic	no
280	Buzzard, Paul J.; Li, Xueyou; Bleisch, William V.	The status of snow leopards Panthera uncia, and high altitude use by common leopards P. pardus, in north-west Yunnan, China	ORYX	2017	51	4	587	589	China	Asia	26.76	100.23	Nujiang Langcang Gorge alpine conifer and mixed forests	Temperate Conifer Forests	Palearctic	no
280	Buzzard, Paul J.; Li, Xueyou; Bleisch, William V.	The status of snow leopards Panthera uncia, and high altitude use by common leopards P. pardus, in north-west Yunnan, China	ORYX	2017	51	4	587	589	China	Asia	26.76	100.23	Hengduan Mountains subalpine	Temperate Conifer Forests	Palearctic
280	Buzzard, Paul J.; Li, Xueyou; Bleisch, William V.	The status of snow leopards Panthera uncia, and high altitude use by common leopards P. pardus, in north-west Yunnan, China	ORYX	2017	51	4	587	589	China	Asia	26.76	100.23	Yunnan Plateau subtropical evergreen forests	Tropical & Subtropical Moist Broadleaf Forests	Palearctic
281	Buzzard, Paul J.; MaMing, Roller; Turghan, Mardan; Xiong, Jiawu; Zhang, Tong	Presence of the snow leopard Panthera uncia confirmed at four sites in the Chinese Tianshan Mountains	ORYX	2017	51	4	594	596	China	Asia	44.63	82.67	Junggar Basin semi-desert	Deserts & Xeric Shrublands	Palearctic	no
281	Buzzard, Paul J.; MaMing, Roller; Turghan, Mardan; Xiong, Jiawu; Zhang, Tong	Presence of the snow leopard Panthera uncia confirmed at four sites in the Chinese Tianshan Mountains	ORYX	2017	51	4	594	596	China	Asia	44.63	82.67	Tian Shan footbill arid steppe	Temperate Grasslands, Savannas & Shrublands	Palearctic
281	Buzzard, Paul J.; MaMing, Roller; Turghan, Mardan; Xiong, Jiawu; Zhang, Tong	Presence of the snow leopard Panthera uncia confirmed at four sites in the Chinese Tianshan Mountains	ORYX	2017	51	4	594	596	China	Asia	44.63	82.67	Tian Shan montaine steppe and meadows	Montane Grasslands & Shrublands	Palearctic
282	Caceres-Martinez, Carlos H.; Acevedo Rincon, Aldemar A.; Gonzalez-Maya, Jose F.	Terrestrial medium and large-sized mammal's diversity and activity patterns from Tama National Natural Park and buffer zone, Colombia	Therya	2016	7	2	285	298	Colombia	SA	7° 14’ 36” N	-72° 13’ 19” W	Cordillera Oriental montane forests	Tropical & Subtropical Moist Broadleaf Forests	Neotropic	no
283	Camacho, Luis; Baquerizo, Reynaldo; Palomino, Joel; Zarzosa, Michel	Deployment of a Set of Camera Trap Networks for Wildlife Inventory in Western Amazon Rainforest	IEEE SENSORS JOURNAL	2017	17	23	8000	8007
284	Campbell, Ruairidh D.; Griffith, Monica	The use of remote cameras for monitoring cage traps during animal trapping	ECOLOGICAL RESEARCH	2015	30	5	963	967
285	Campbell, TA; Langdon, CA; Laseter, BR; Ford, WM; Edwards, JW; Miller, KV	Movements of female white-tailed deer to bait sites in West Virginia, USA	WILDLIFE RESEARCH	2006	33	1	1	4	USA	NA	38°42'N	80°3'W	Appalachian mixed mesophytic forests	Temperate Broadleaf & Mixed Forests	Nearctic	no
287	Campos, Claudia M.; Velez, Silvina; Florencia Miguel, Maria; Papu, Sofia; Cona, Monica I.	Studying the quantity component of seed dispersal effectiveness from exclosure treatments and camera trapping	ECOLOGY AND EVOLUTION	2018	8	11	5470	5479	Argentina	SA	34°02?S	67°58?W	Low Monte	Temperate Grasslands, Savannas & Shrublands	Neotropic	no
288	Campos, Felipe Siqueira; Bastos Lage, Alexandre Ramos; Pinheiro Ribeiro, Paulo Henrique	DIVERSITY OF MEDIUM AND LARGE SIZED MAMMALS IN A CERRADO FRAGMENT OF CENTRAL BRAZIL	Journal of Threatened Taxa	2013	5	15	4994	5001	Brazil	SA	-16.64	-48.66	Cerrado	Tropical & Subtropical Grasslands, Savannas & Shrublands	Neotropic	no
289	Campos, Renata Calixto; Steiner, Josefina; Zillikens, Anne	Bird and mammal frugivores of Euterpe edulis at Santa Catarina island monitored by camera traps	STUDIES ON NEOTROPICAL FAUNA AND ENVIRONMENT	2012	47	2	105	110	Brazil	SA	27°31? S	48°30? W	Serra do Mar coastal forests	Tropical & Subtropical Moist Broadleaf Forests	Nearctic	yes
290	Campos, Z.; Muniz, F.; Desbiez, A. L. J.; Magnusson, W. E.	Predation on eggs of Schneider's dwarf caiman, Paleosuchus trigonatus (Schneider, 1807), by armadillos and other predators	JOURNAL OF NATURAL HISTORY	2016	50	25-26	1543	1548	Brazil	SA	-3.4	-51.98	Tapajós-Xingu moist forests	Tropical & Subtropical Moist Broadleaf Forests	Neotropic	no
291	Campos, Z.; Mourao, G.	Camera traps capture images of predators of Caiman crocodilus yacare eggs (Reptilia: Crocodylia) in Brazil's Pantanal wetlands	JOURNAL OF NATURAL HISTORY	2015	49	15-16	977	982	Brazil	SA	18°59? S	56°39? W	Pantanal	Flooded Grasslands & Savannas	Neotropic
293	Can, Oezguen Emre; Togan, Inci	Camera trapping of large mammals in Yenice Forest, Turkey: local information versus camera traps	ORYX	2009	43	3	427	430	Turkey	Europe	41°12'00.0"N	32°19'45.0"E	Euxine-Colchic broadleaf forests	Tempearate Broadleaf & Mixed Forests	Palearctic	no
294	Can, Ozgun Emre; Kandemir, Irfan; Togan, Inci	The wildcat Felis silvestris in northern Turkey: assessment of status using camera trapping	ORYX	2011	45	1	112	118	Turkey	Europe	41°12'00.0"N	32°19'45.0"E	Euxine-Colchic broadleaf forests	Tempearate Broadleaf & Mixed Forests	Palearctic	no
295	Candler, Ellen M.; Severud, William J.; Bump, Joseph K.	Who takes the bait? Nontarget species use of bear hunter bait sites	HUMAN-WILDLIFE INTERACTIONS	2019	13	1	98	110	USA	NA	46.17	-87.24	Western Great Lakes forests	Tempearate Broadleaf & Mixed Forests	Nearctic	no
297	Cappa, Flavio M.; Borghi, Carlos E.; Giannoni, Stella M.	How Roads Affect the Spatial Use of the Guanaco in a South American Protected Area: Human Connectivity vs Animal Welfare	DIVERSITY-BASEL	2019	11	7			Argentina	SA	29°55´ S	68°05´ W	High Monte	Montane Grasslands & Shrublands	Neotropic	no
298	Cappelle, Noemie; Despres-Einspenner, Marie-Lyne; Howe, Eric J.; Boesch, Christophe; Kuehl, Hjalmar S.	Validating camera trap distance sampling for chimpanzees	AMERICAN JOURNAL OF PRIMATOLOGY	2019	81	3			Côte d'Ivoire	Africa	5°08?N	6°47?W	Western Guinean lowland forests	Tropical & Subtropical Moist Broadleaf Forests	Afrotropic	no
300	Caravaggi, Anthony; Gatta, Maria; Vallely, Marie-Claire; Hogg, Kayleigh; Freeman, Marianne; Fadaei, Erfan; Dick, Jaimie T. A.; Montgomery, W. Ian; Reid, Neil; Tosh, David G.	Seasonal and predator-prey effects on circadian activity of free-ranging mammals revealed by camera traps	PEERJ	2018	6				UK	Europe	54.64	-6.66	Celtic broadleaf forests	Temperate Broadleaf & Mixed Forests	Palearctic	no
300	Caravaggi, Anthony; Gatta, Maria; Vallely, Marie-Claire; Hogg, Kayleigh; Freeman, Marianne; Fadaei, Erfan; Dick, Jaimie T. A.; Montgomery, W. Ian; Reid, Neil; Tosh, David G.	Seasonal and predator-prey effects on circadian activity of free-ranging mammals revealed by camera traps	PEERJ	2018	6				UK	Europe	54.64	-6.66	North Atlantic moist mixed forests	Temperate Broadleaf & Mixed Forests	Palearctic
302	Caravaggi, Anthony; Zaccaroni, Marco; Riga, Francesco; Schai-Braun, Stephanie C.; Dick, Jaimie T. A.; Montgomery, W. Ian; Reid, Neil	An invasive-native mammalian species replacement process captured by camera trap survey random encounter models	REMOTE SENSING IN ECOLOGY AND CONSERVATION	2016	2	1	45	58	UK	Europe	54°45?21.1?N	6°39?29.6?W	Celtic broadleaf forests	Temperate Broadleaf & Mixed Forests	Palearctic	no
303	Carbone, C; Christie, S; Conforti, K; Coulson, T; Franklin, N; Ginsberg, JR; Griffiths, M; Holden, J; Kawanishi, K; Kinnaird, M; Laidlaw, R; Lynam, A; Macdonald, DW; Martyr, D; McDougal, C; Nath, L; O'Brien, T; Seidensticker, J; Smith, DJL; Sunquist, M; Tilson, R; Shahruddin, WNW	The use of photographic rates to estimate densities of tigers and other cryptic mammals	ANIMAL CONSERVATION	2001	4		75	79
304	Carricondo-Sanchez, David; Odden, Morten; Kulkarni, Abhijeet; Vanak, Abi Tamim	Scale-dependent strategies for coexistence of mesocarnivores in human-dominated landscapes	BIOTROPICA	2019	51	5	781	791	India	Asia	17.56	74.84	Deccan thorn scrub forests	Deserts & Xeric Shrublands	Indomalayan	no
305	Carter, Andrew; Potts, Joanne M.; Roshier, David A.	Toward reliable population density estimates of partially marked populations using spatially explicit mark-resight methods	ECOLOGY AND EVOLUTION	2019	9	4	2131	2141	Australia	Australia	?33.15°S	141.06°E	Murray-Darling woodlands and mallee	Mediterranean Forests, Woodlands & Scrub	Australasia	no
306	Carter, Neil H.; Gurung, Bhim; Vina, Andres; Campa, Henry, III; Karki, Jhamak B.; Liu, Jianguo	Assessing spatiotemporal changes in tiger habitat across different land management regimes	ECOSPHERE	2013	4	10			Nepal	Asia	27.53	84.45	Himalayan subtropical broadleaf forests	Tropical & Subtropical Moist Broadleaf Forests	Indomalayan	no
307	Carthey, Alexandra J. R.; Banks, Peter B.	Naive, bold, or just hungry? An invasive exotic prey species recognises but does not respond to its predators	BIOLOGICAL INVASIONS	2018	20	12	3417	3429	Australia	Australia	-33.85	151.89	Eastern Australian temperate forests	Temperate Broadleaf & Mixed Forests	Australasia	no
308	Carthey, Alexandra J. R.; Banks, Peter B.	Naivete is not forever: responses of a vulnerable native rodent to its long term alien predators	OIKOS	2016	125	7	918	926	Australia	Australia	-33.62	151.25	Eastern Australian temperate forests	Temperate Broadleaf & Mixed Forests	Australasia	no
310	Caruso, N.; Luengos Vidal, E.; Guerisoli, M.; Lucherini, M.	Carnivore occurrence: do interview-based surveys produce unreliable results ?	ORYX	2017	51	2	240	245	Argentina	SA	-39.79	-62.66	Espinal	Temperate Grasslands, Savannas & Shrublands	Neotropic	no
311	Caruso, Nicolas; Valenzuela, Alejandro E. J.; Burdett, Christopher L.; Luengos Vidal, Estela M.; Birochio, Diego; Casanave, Emma B.	Summer habitat use and activity patterns of wild boar Sus scrofa in rangelands of central Argentina	PLOS ONE	2018	13	10			Argentina	SA	-39.79	-62.66	Espinal	Temperate Grasslands, Savannas & Shrublands	Neotropic	no
312	Caruso, Nicolas; Manfredi, Claudia; Luengos Vidal, Estela M.; Casanaveo, Emma B.; Lucherinio, Mauro	First density estimation of two sympatric small cats, Leopardus colocolo and Leopardus geoffroyi, in a shrubland area of central Argentina	ANNALES ZOOLOGICI FENNICI	2012	49	3	181	191	Argentina	SA	38°42´S	62°56´W	Espinal	Temperate Grasslands, Savannas & Shrublands	Neotropic	no
313	Carvalho, W. D.; Adania, C. H.; Esberard, C. E. L.	Comparison of two mammalian surveys made with camera traps in southeastern Brazil, focusing the abundance of wild mammals and domestic dogs	BRAZILIAN JOURNAL OF BIOLOGY	2013	73	1	29	36	Brazil	SA	23° 21’S	47° 05’ W	Serro do mar coastal forests	Tropical & Subtropical Moist Broadleaf Forests	Neotropic	no
314	Carvalho, William D.; Rosalino, Luis M.; Adania, Cristina H.; Esberard, Carlos E. L.	Mammal inventories in Seasonal Neotropical Forests: traditional approaches still compensate drawbacks of modern technologies	IHERINGIA SERIE ZOOLOGIA	2016	106				Brazil	SA	23°21’S	47°05’W	Serro do mar coastal forests	Tropical & Subtropical Moist Broadleaf Forests	Neotropic	no
315	Carvalho, William Douglas; Rosalino, Luis Miguel; Godoy, Maira Sant'Ana M.; Giorgete, Marilia F.; Adania, Cristina Harumi; Esberard, Carlos E. Lustosa	Temporal activity of rural free-ranging dogs: implications for the predator and prey species in the Brazilian Atlantic Forest	NEOBIOTA	2019		45	55	74	Brazil	SA	23°21’S	47°05’W	Serro do mar coastal forests	Tropical & Subtropical Moist Broadleaf Forests	Neotropic	no
316	Casanova, Diogo C.; Morato, Ronaldo G.; Goncalves, Henrique; Endo, Whaldener; de Paula Rodarte, Raisa Reis; de Camargos, Virginia Londe	Rediscovery of jaguar in an Atlantic Rainforest area, south-east of Bahia State, Brazil.	Cat News	2018	68		32	35	Brazil	SA	27°02’3.16”S	50°08’21.36”W	Serra do Mar coastal forests	Tropical & Subtropical Moist Broadleaf Forests	Neotropic	no
317	Cassaigne, Ivonne; Medellin, Rodrigo A.; Thompson, Ron W.; Culver, Melanie; Ochoa, Alexander; Vargas, Karla; Childs, Jack L.; Sanderson, Jim; List, Rurik; Torres-Gomez, Armando	DIET OF PUMAS (PUMA CONCOLOR) IN SONORA, MEXICO, AS DETERMINED BY GPS KILL SITES AND MOLECULAR IDENTIFIED SCAT, WITH COMMENTS ON JAGUAR (PANTHERA ONCA) DIET	SOUTHWESTERN NATURALIST	2016	61	2	125	132	Mexico	NA	29.61	-109.49	Chihuahuan desert	Deserts & Xeric Shrublands	Nearctic	no
317	Cassaigne, Ivonne; Medellin, Rodrigo A.; Thompson, Ron W.; Culver, Melanie; Ochoa, Alexander; Vargas, Karla; Childs, Jack L.; Sanderson, Jim; List, Rurik; Torres-Gomez, Armando	DIET OF PUMAS (PUMA CONCOLOR) IN SONORA, MEXICO, AS DETERMINED BY GPS KILL SITES AND MOLECULAR IDENTIFIED SCAT, WITH COMMENTS ON JAGUAR (PANTHERA ONCA) DIET	SOUTHWESTERN NATURALIST	2016	61	2	125	132	Mexico	NA	29.61	-109.49	Sonoran-Sinaloan subtropical dry forest	Tropical & Subtropical Dry Broadleaf Forests	Nearctic
317	Cassaigne, Ivonne; Medellin, Rodrigo A.; Thompson, Ron W.; Culver, Melanie; Ochoa, Alexander; Vargas, Karla; Childs, Jack L.; Sanderson, Jim; List, Rurik; Torres-Gomez, Armando	DIET OF PUMAS (PUMA CONCOLOR) IN SONORA, MEXICO, AS DETERMINED BY GPS KILL SITES AND MOLECULAR IDENTIFIED SCAT, WITH COMMENTS ON JAGUAR (PANTHERA ONCA) DIET	SOUTHWESTERN NATURALIST	2016	61	2	125	132	Mexico	NA	29.61	-109.49	Sierra Madre Occidental pine-oak forests	Tropical & Subtropical Dry Broadleaf Forests	Nearctic
318	Cassano, Camila R.; Barlow, Jos; Pardini, Renata	Large Mammals in an Agroforestry Mosaic in the Brazilian Atlantic Forest	BIOTROPICA	2012	44	6	818	825	Brazil	SA	39°5'W	15°14'S	Bahia coastal forests	Tropical & Subtropical Moist Broadleaf Forests	Neotropic	no
319	Castaneda, Franklin E.; Mccranie, James R.; Herrera, Luis A.	STAUROTYPUS TRIPORCATUS (Giant Musk Turtle; Guao de Tres Filas). PREDATION	Herpetological Review	2013	44	2	309	309	Honduras	NA	15.8622	87.6838	Central American Atlantic moist forests	Tropical & Subtropical Moist Broadleaf Forests	Neotropic	no
320	Castillo-Figueroa, Dennis; Martinez-Medina, Daniela; Rodriguez-Posada, Miguel E.; Bernal-Vergara, Sandra	Structural differences in mammal assemblages between savanna ecosystems of the Colombian Llanos	Papeis Avulsos de Zoologia (Sao Paulo)	2019	59		e20195914	Article No.: e20195914	Colombia	SA	5.83	-69.61	Llanos	Tropical & Subtropical Grasslands, Savannas & Shrublands	Neotropic	no
322	Castleberry, Steven B.; Mengak, Michael T.; Menken, Theron E.	Comparison of Trapping and Camera Survey Methods for Determining Presence of Allegheny Woodrats	WILDLIFE SOCIETY BULLETIN	2014	38	2	414	418	USA	NA	37.62	-79.48	Appalachian-Blue Ridge forests	Temperate Broadleaf & Mixed Forests	Nearctic
323	Caudill, S. Amanda; Rice, Robert A.	Do Bird Friendly (R) Coffee Criteria Benefit Mammals? Assessment of Mammal Diversity in Chiapas, Mexico	PLOS ONE	2016	11	11			Mexico	NA	15°7.90 N	92°16.46 W	Sierra Madre Chiapas moist forests	Tropical & Subtropical Moist Broadleaf Forests	Neotropic	yes
324	Cavada, Nathalie; Havmoller, Rasmus Worsoe; Scharff, Nikolaj; Rovero, Francesco	A landscape-scale assessment of tropical mammals reveals the effects of habitat and anthropogenic disturbance on community occupancy	PLOS ONE	2019	14	4			Tanzania	Africa	-7.93	36.6	Dry miombo woodlands	Tropical & Subtropical Grasslands, Savannas & Shrublands	Afrotropic	no
324	Cavada, Nathalie; Havmoller, Rasmus Worsoe; Scharff, Nikolaj; Rovero, Francesco	A landscape-scale assessment of tropical mammals reveals the effects of habitat and anthropogenic disturbance on community occupancy	PLOS ONE	2019	14	4			Tanzania	Africa	-7.93	36.6	Eastern Arc forests	Tropical & Subtropical Moist Broadleaf Forests	Afrotropic
325	Centore, Laura; Ugarkovic, Damir; Scaravelli, Dino; Safner, Toni; Panduric, Karlo; Sprem, Nikica	Locomotor activity pattern of two recently introduced non-native ungulate species in a Mediterranean habitat	FOLIA ZOOLOGICA	2018	67	1	17	24	Ecuador	SA	01°32? S	080°40? W	Ecuadorian dry forests	Tropical & Subtropical Dry Broadleaf Forests	Neotropic	no
326	Cervera, Laura; Lizcano, Diego J.; Pares-Jimenez, Violeta; Espinoza, Sueanny; Poaquiza, Diana; de la Montana, Enrique; Griffith, Daniel M.	A camera trap assessment of terrestrial mammals in Machalilla National Park, western Ecuador.	Check List	2016	12	2	1868	1868	Ecuador	SA	01°32? S	080°40? W	Ecuadorian dry forests	Tropical & Subtropical Dry Broadleaf Forests	Neotropic	no
327	Chaiyarat, Rattanawat; Youngpoy, Namphung; Kongsurakan, Praeploy; Nakbun, Seree	Habitat preferences of reintroduced banteng (Bos javanicus) into the Salakphra Wildlife Sanctuary, Thailand	WILDLIFE RESEARCH	2019	46	7	573	586	Croatia	Europe	44.79	14.6694	Tyrrhenian-Adriatic sclerophyllous and mixed forests	Mediterranean Forests, Woodlands & Scrub	Palearctic	no
328	Chaiyarat, Rattanawat; Youngpoy, Namphung; Prempree, Prawut	Wild Asian elephant Elephas maximus population in Salakpra Wildlife Sanctuary, Thailand	ENDANGERED SPECIES RESEARCH	2015	29	2	95	102	Thailand	Asia	14.1358	99.3426	Chao Phraya lowland moist deciduous forests	Tropical & Subtropical Moist Broadleaf Forests	Indomalayan	no
329	Chambers, David L.; Vance, James A.	Camera Trap Success Among Carnivores and Prey Animals in Tazewell County, Virginia	Virginia Journal of Science	2012	63	###	129	135	USA	NA	37.1	-81.56	Appalachian-Blue Ridge forests	Temperate Broadleaf & Mixed Forests	Nearctic	no
330	Chanchani, Pranav; Gerber, Brian D.; Noon, Barry R.	Elevated potential for intraspecific competition in territorial carnivores occupying fragmented landscapes	BIOLOGICAL CONSERVATION	2018	227		275	283	India	Asia	28.54	80.61	Terai-Duar savanna and grasslands	Tropical & Subtropical Grasslands, Savannas & Shrublands	Indomalayan	no
330	Chanchani, Pranav; Gerber, Brian D.; Noon, Barry R.	Elevated potential for intraspecific competition in territorial carnivores occupying fragmented landscapes	BIOLOGICAL CONSERVATION	2018	227		275	283	India	Asia	28.54	80.61	Upper Gangetic Plains moist deciduous forests	Tropical & Subtropical Moist Broadleaf Forests	Indomalayan
331	Chandler, Richard B.; Engebretsen, Kristin; Cherry, Michael J.; Garrison, Elina P.; Miller, Karl V.	Estimating recruitment from capture-recapture data by modelling spatio-temporal variation in birth and age-specific survival rates	METHODS IN ECOLOGY AND EVOLUTION	2018	9	10	2115	2130	USA	NA	26.07	-81.04	Everglades flooded grasslands	Flooded Grasslands & Savannas	Neotropic	no
332	Channa, Phan; Kamler, Jan F.; Macdonald, David W.	The first records of Yellow-bellied Weasel Mustela kathiah from Cambodia	Small Carnivore Conservation	2014	50		39	41	Cambodia	Asia	11.85	103.49	Cardamom Mountains rain forests	Tropical & Subtropical Moist Broadleaf Forests	Indomalayan	no
333	Channa, Phan; Sovanna, Prum; Gray, Thomas N.E.	Recent camera trap records of globally threatened species from the Eastern Plains Landscape, Mondulkiri.	Cambodian Journal of Natural History	2010	2010	2	89	93	Cambodia	Asia	12.93	107.13	Central Indochina dry forests	Tropical & Subtropical Dry Broadleaf Forests	Indomalayan	no
334	Channa, Phan; Gray, Thomas N.E.	Ecology and natural history of banteng in eastern Cambodia: evidence from camera trapping in Mondulkiri Protected Forest and Phnom Prich Wildlife Sanctuary.	Cambodian Journal of Natural History	2010	2010	2	118	125	Cambodia	Asia	12.93	107.13	Central Indochina dry forests	Tropical & Subtropical Dry Broadleaf Forests	Indomalayan	no
335	Chapman, Shannon; Balme, Guy	An estimate of leopard population density in a private reserve in KwaZulu-Natal, South Africa, using camera-traps and capture-recapture models	SOUTH AFRICAN JOURNAL OF WILDLIFE RESEARCH	2010	40	2	114	120	South Africa	Africa	-27.73	32.06	Limpopo lowveld	Tropical & Subtropical Grasslands, Savannas & Shrublands	Afrotropic	no
336	Charaspet, Khwanrutai; Sukmasuang, Ronglarp; Khoewsree, Noraset; Pla-Ard, Mananya; Songsasen, Nucharin; Simchareon, Saksit	Movement, home range size and activity pattern of the golden jackal (Canis aureus, Linneaus, 1758) in Huai Kha Khaeng Wildlife Sanctuary, Thailand.	Biodiversitas	2019	20	11	3430	3438	Thailand	Asia	15.6	99.32	Kayah-Karen montane rain forests	Tropical & Subtropical Moist Broadleaf Forests	Indomalayan	no
337	Charaspet, Khwanrutai; Sukmasuang, Ronglarp; Duengkae, Prateep	PREY SPECIES AND HABITAT USE OF DHOLE (Cuon alpinus) IN SALAKPRA WILDLIFE SANCTUARY.	Journal of Wildlife in Thailand	2015	22	1	101	109	Thailand	Asia	14.1358	99.3426	Chao Phraya lowland moist deciduous forests	Tropical & Subtropical Moist Broadleaf Forests	Indomalayan	no
338	Charoo, Samina Amin; Sharma, Lalit Kumar; Sathyakumar, Sambandam	Distribution and relative abundance of Kashmir red deer of hangul (Cervus elaphus hanglu) at Dachigam National Park, Kashmir, India.	Galemys	2010	22		171	184	India	Asia	34.13	75.04	Western Himalayan broadleaf forests	Temperate Broadleaf & Mixed Forests	Indomalayan	no
339	Charre-Medellin, Juan F.; Barragan-Lopez, Esteban; Torres-Villa, Rogelia; del Socorro Alvarado, Maria; Monterrubio-Rico, Tiberio C.; Gutierrez-Barragan, Alexsandre	Jaguar in the Tepalcatepec basin in central-western Michoacan, Mexico	Therya	2018	9	2	191	194	Mexico	NA	19.52	-102.66	Trans-Mexican Volcanic Belt pine-oak forests	Tropical & Subtropical Coniferous Forests	Neotropic	no
340	Charruau, Pierre; Henaut, Yann	Nest attendance and hatchling care in wild American crocodiles (Crocodylus acutus) in Quintana Roo, Mexico	ANIMAL BIOLOGY	2012	62	1	29	51	Mexico	NA	18.59	-87.32	Mesoamerican Gulf-Caribbean mangroves	Mangroves	Neotropic	no
341	CHELAZZI, G; SANTINI, G; PARPAGNOLI, D; DELLASANTINA, P	COUPLING MOTOGRAPHIC AND SONOGRAPHIC RECORDING TO ASSESS FORAGING BEHAVIOR OF PATELLA-VULGATA	JOURNAL OF MOLLUSCAN STUDIES	1994	60		123	128	UK	Europe	53.22	-4.17	Celtic broadleaf forests	Temperate Broadleaf & Mixed Forests	Palearctic	yes
342	Chen, Cheng; Quan, Rui-Chang; Cao, Guanghong; Yang, Hongpei; Burton, A. Cole; Meitner, Michael; Brodie, Jedediah F.	Effects of law enforcement and community outreach on mammal diversity in a biodiversity hotspot	CONSERVATION BIOLOGY	2019	33	3	612	622	China	Asia	21.97	100.94	Northern Indochina subtropical forests	Tropical & Subtropical Moist Broadleaf Forests	Indomalayan	no
345	Chen, Mei-Ting; Tewes, Michael E.; Pei, Kurtis J.; Grassman, Lon I., Jr.	Activity patterns and habitat use of sympatric small carnivores in southern Taiwan	MAMMALIA	2009	73	1	20	26	Taiwan	Asia	23.11	120.81	South Taiwan monsoon rain forests	Tropical & Subtropical Moist Broadleaf Forests	Indomalayan	no
345	Chen, Mei-Ting; Tewes, Michael E.; Pei, Kurtis J.; Grassman, Lon I., Jr.	Activity patterns and habitat use of sympatric small carnivores in southern Taiwan	MAMMALIA	2009	73	1	20	26	Taiwan	Asia	23.11	120.81	Taiwan subtropical evergreen forests	Tropical & Subtropical Moist Broadleaf Forests	Indomalayan	no
346	Chen, Tian-Bo; Sung, Yik-Hei; Chan, Pui-Lok Bosco; Meng, Yuan-Jun; Wan, Pak-Ho	Influence of surface water availability on mammal distributions in Nonggang National Nature Reserve, Guangxi, China	Zoological Research	2013	34	3	145	151
349	Chen, Yixin; Xiang, Zuofu; Wang, Xinwen; Xiao, Wen; Xiao, Zhishu; Ren, Baoping; He, Chengxiang; Sang, Caihe; Li, Haishu; Li, Ming	Preliminary Study of the Newly Discovered Primate Species Rhinopithecus strykeri at Pianma, Yunnan, China Using Infrared Camera Traps	INTERNATIONAL JOURNAL OF PRIMATOLOGY	2015	36	4	679	690	China	Asia	26°2.337?N,	98°39.127?E	Nujiang Langcang Gorge alpine conifer and mixed forests	Temperate Conifer Forests	Palearctic
351	Cheng Songlin; Mao Yixian; Hu Eryi; Lei Ping; Yuan Rongbin; Zou Sicheng	Population Biology and Altitudinal Distribution of Caboti Tragopans in Jiangxi Wuyishan Nature Reserve.	Scientia Silvae Sinicae	2017	53	10	160	167	China	Asia	27.81	117.84	Jian Nan subtropical evergreen forests	Tropical & Subtropical Moist Broadleaf Forests	Indomalayan	no
353	Chetana, H. C.; Ganesh, T.	Survey and activity patterns of nocturnal mammals in a fragmented dry deciduous forest of Karnataka	Zoos Print Journal	2007	22	4	2644	2647	India	Asia	12.9189	77.3031	South Deccan Plateau dry deciduous forests	Tropical & Subtropical Dry Broadleaf Forests	Indomalayan	no
354	Chevallier, Clement; Lai, Sandra; Berteaux, Dominique	Predation of arctic fox (Vulpes lagopus) pups by common ravens (Corvus corax)	POLAR BIOLOGY	2016	39	7	1335	1341	Canada	NA	73N	80W	Canadian High Arctic tundra	Tundra	Nearctic	no
355	Cheyne, Susan M.; Supiansyah; Adul; Wilcox, Cara H.; Cahyaningrum, Eka; Smith, Yvette C. Ehlers; Smith, David A. Ehlers; Kulu, Ici P.	A Short Cut to Mushrooms - Red Langur (Presbytis rubicunda) Consumption of Terrestrial Fungus	FOLIA PRIMATOLOGICA	2019	90	3	190	198	Indonesia	Asia	-2.6	113.67	Sundaland heath forests	Tropical & Subtropical Moist Broadleaf Forests	Indomalayan	no
355	Cheyne, Susan M.; Supiansyah; Adul; Wilcox, Cara H.; Cahyaningrum, Eka; Smith, Yvette C. Ehlers; Smith, David A. Ehlers; Kulu, Ici P.	A Short Cut to Mushrooms - Red Langur (Presbytis rubicunda) Consumption of Terrestrial Fungus	FOLIA PRIMATOLOGICA	2019	90	3	190	198	Indonesia	Asia	-2.6	113.67	Southwest Borneo freshwater swamp forests	Tropical & Subtropical Moist Broadleaf Forests	Indomalayan
356	Cheyne, Susan M.; Stark, Danica J.; Limin, Suwido H.; Macdonald, David W.	First estimates of population ecology and threats to Sunda clouded leopards Neofelis diardi in a peat-swamp forest, Indonesia	ENDANGERED SPECIES RESEARCH	2013	22	1	1	9	Indonesia	Asia	2° 19’ S	113° 54’ E	Southwest Borneo freshwater swamp forests	Tropical & Subtropical Moist Broadleaf Forests	Indomalayan	no
357	Cheyne, Susan M.; Macdonald, David W.	Wild felid diversity and activity patterns in Sabangau peat-swamp forest, Indonesian Borneo	ORYX	2011	45	1	119	124	Indonesia	Asia	2° 19’ S	113° 54’ E	Southwest Borneo freshwater swamp forests	Tropical & Subtropical Moist Broadleaf Forests	Indomalayan	no
358	Cheyne, Susan M.; Husson, Simon J.; Macdonald, David W.	First Otter Civet Cynogale bennettii photographed in Sabangau Peat-swamp Forest, Indonesian Borneo	Small Carnivore Conservation	2010	42		25	26	Indonesia	Asia	2° 19’ S	113° 54’ E	Southwest Borneo freshwater swamp forests	Tropical & Subtropical Moist Broadleaf Forests	Indomalayan	no
359	Cheyne, Susan M.; Morrogh-Bernard, Helen; MacDonald, David W.	First flat-headed cat photo from Sabangau peat-swamp forest, Indonesian Borneo.	Cat News	2009	51		18	18	Indonesia	Asia	2° 19’ S	113° 54’ E	Southwest Borneo freshwater swamp forests	Tropical & Subtropical Moist Broadleaf Forests	Indomalayan	no
360	Chiang, Po-Jen; Pei, Kurtis Jai-Chyi; Vaughan, Michael R.; Li, Ching-Feng; Chen, Mei-Ting; Liu, Jian-Nan; Lin, Chung-Yi; Lin, Liang-Kong; Lai, Yu-Ching	Is the clouded leopard Neofelis nebulosa extinct in Taiwan, and could it be reintroduced? An assessment of prey and habitat	ORYX	2015	49	2	261	269	Taiwan	Asia	23.77	121.06	Tawian subtropical evergreen forests	Tropical & Subtropical Moist Broadleaf Forests	Indomalayan	no
360	Chiang, Po-Jen; Pei, Kurtis Jai-Chyi; Vaughan, Michael R.; Li, Ching-Feng; Chen, Mei-Ting; Liu, Jian-Nan; Lin, Chung-Yi; Lin, Liang-Kong; Lai, Yu-Ching	Is the clouded leopard Neofelis nebulosa extinct in Taiwan, and could it be reintroduced? An assessment of prey and habitat	ORYX	2015	49	2	261	269	Taiwan	Asia	23.77	121.06	South Taiwan monsoon rain forests	Tropical & Subtropical Moist Broadleaf Forests	Indomalayan
361	Chistopolova, M. D.; Rozhnov, V. V.; Hernandez-Blanco, J. A.; Naidenko, S. V.; Sorokin, P. A.	A New Analytical Approach to the Study of the Spatial Structure of the Amur Leopard (Panthera pardus orientalis) Population	RUSSIAN JOURNAL OF ECOLOGY	2018	49	6	534	542	Russia	Asia	43.27	131.46	Manchurian mixed forest	Temperate Broadleaf & Mixed Forests	Palearctic	no
362	Chitchamnong, Watchara; Bhumpakphan, Naris; Sukmasuang, Ronglarp	SOME ECOLOGICAL ASPECTS OF SIAMESE CROCODILE (Crocodylus sismensis) IN KHAO ANG RUE NAI WILDLIFE SANCTUARY.	Journal of Wildlife in Thailand	2016	23	1	77	89	Thailand	Asia	13.01	101.92	Cardamom Mountains rain forests	Tropical & Subtropical Moist Broadleaf Forests	Indomalayan	no
364	Chowdhury, Sayam U.; Moniruzzaman, Md; Neumann-Denzau, Gertrud; Kabir, Jahidul	Observations of the breeding of the Endangered Masked Finfoot Heliopais personatus in the Bangladesh Sundarbans	FORKTAIL	2018		34	65	67	Bangladesh	Asia	21.95	89.74	Sundarbans mangroves	Mangroves	Indomalayan	no
366	Chtuipong, W.; Tantipisanuh, N.; Ngoprasert, D.; Lynam, A. J.; Steinmetz, R.; Jenks, K. E.; Grassman, L. I., Jr.; Tewes, M.; Kitamura, S.; Baker, M. C.; Mcshea, W.; Bhumpakphan, N.; Sukmasuang, R.; Gale, G. A.; Harich, F. K.; Treydte, A. C.; Cutter, P.; Cutter, P. B.; Suwanrat, S.; Siripattaranukul, K.; Duckworth, J. W.	Current distribution and conservation status of small carnivores in Thailand: a baseline review	Small Carnivore Conservation	2014	51		96	136	Thailand	Asia
367	Chupil, Henrique; Monteiro-Filho, Emygdio L.A.	Could a bird carcass be part of the feeding habits of a Boat-billed Heron Cochlearius cochlearius (Pelecaniformes: Ardeidae)?	Atualidades Ornitologicas	2019	207		4	5	Brazil	SA	-25.2992	-48.0914	Serra do mar coastal forests	Tropical & Subtropical Moist Broadleaf Forests	Neotropic	no
368	Chutipong, Wanlop; Kamjing, Anucha; Klinsawat, Worata; Ngoprasert, Dusit; Phosri, Kitipat; Sukumal, Niti; Wongtung, Pongnapa; Tantipisanuh, Naruemon	AN UPDATE ON THE STATUS OF FISHING CAT PRIONAILURUS VIVERRINUS BENNETT, 1833 (CARNIVORA: FELIDAE) IN THAILAND	Journal of Threatened Taxa	2019	11	4	13459	13469	Thailand	Asia	16.883	100.283	Chao Phraya freshwater swamp	Tropical & Subtropical Moist Broadleaf Forests	Indomalayan	no
369	Chutipong, Wanlop; Lynam, Antony J.; Steinmetz, Robert; Savini, Tommaso; Gale, George A.	Sampling mammalian carnivores in western Thailand: Issues of rarity and detectability	RAFFLES BULLETIN OF ZOOLOGY	2014	62		521	535	Thailand	Asia	15°23'N	99°05'E	Kayah-Karen montane rain forests	Tropical & Subtropical Moist Broadleaf Forests	Indomalayan	no
371	Cid, Bruno; Oliveira-Santos, Luiz Gustavo R.; Mourao, Guilherme	The relationship between external temperature and daily activity in a large rodent (Dasyprocta azarae) in the Brazilian Pantanal	JOURNAL OF TROPICAL ECOLOGY	2015	31		469	472	Brazil	SA	18º59 S	56º39 W	Pantanal	Flooded Grasslands & Savannas	Neotropic	no
372	Cid, Bruno; Oliveira-Santos, Luiz Gustavo R.; Mourao, Guilherme	Seasonal Habitat Use of Agoutis (Dasyprocta azarae) is Driven by the Palm Attalea phalerata in Brazilian Pantanal	BIOTROPICA	2013	45	3	380	385	Brazil	SA	18º59 S	56º39 W	Pantanal	Flooded Grasslands & Savannas	Neotropic	no
373	Clare, John; McKinney, Shawn T.; DePue, John E.; Loftin, Cynthia S.	Pairing field methods to improve inference in wildlife surveys while accommodating detection covariance	ECOLOGICAL APPLICATIONS	2017	27	7	2031	2047	USA	NA	46.149° N	69.124° W	New England-Acadian forests	Temperate Broadleaf & Mixed Forests	Nearctic	no
374	Clare, John D. J.; Townsend, Philip A.; Anhalt-Depies, Christine; Locke, Christina; Stenglein, Jennifer L.; Frett, Susan; Martin, Karl J.; Singh, Aditya; Van Deelen, Timothy R.; Zuckerberg, Benjamin	Making inference with messy (citizen science) data: when are data accurate enough and how can they be improved?	ECOLOGICAL APPLICATIONS	2019	29	2
375	Clare, John D. J.; Linden, Daniel W.; Anderson, Eric M.; MacFarland, David M.	Do the antipredator strategies of shared prey mediate intraguild predation and mesopredator suppression?	ECOLOGY AND EVOLUTION	2016	6	12	3884	3897	USA	NA	44.8	-90.52	Upper Midwest US forest-savanna transiion	Temperate Broadleaf & Mixed Forests	Nearctic	no
376	Clare, John D. J.; Anderson, Eric M.; MacFarland, David M.; Sloss, Brian L.	Comparing the Costs and Detectability of Bobcat Using Scat-Detecting Dog and Remote Camera Surveys in Central Wisconsin	WILDLIFE SOCIETY BULLETIN	2015	39	1	210	217	USA	NA	44.43	-90.19	Upper Midwest US forest-savanna transiion	Temperate Broadleaf & Mixed Forests	Nearctic	no
377	Claridge, A. W.; Paull, D. J.; Welbourne, D. J.	Elucidating patterns in the occurrence of threatened ground-dwelling marsupials using camera-traps.	Animals	2019	9	11	913	913	Australia	Australia	-37.14	149.97	Southeast Australia temperate forests	Temperate Broadleaf & Mixed Forests	Australasia	no
379	Claridge, Andrew W.; Paull, David J.; Cunningham, Ross B.	Oils ain't oils: can truffle-infused food additives improve detection of rare and cryptic mycophagous mammals?	AUSTRALIAN MAMMALOGY	2016	38	1	12	20	Australia	Australia	-37.14	149.97	Southeast Australia temperate forests	Temperate Broadleaf & Mixed Forests	Australasia	no
380	Clark, Howard O., Jr.; Orland, Mary C.	Comparison of two camera trap systems for detection of American marten on a winter landscape	CALIFORNIA FISH AND GAME	2008	94	1	53	59	USA	NA	38° 53.49’N	119° 59.77’W	Sierra Nevada forests	Temperate Conifer Forests	Nearctic	no
381	Cloyed, Carl S.; Cappelli, Laura R.; Tilson, David A.; Crawford, John A.; Dell, Anthony, I	Using Camera Traps to Assess Mammal and Bird Assemblages in a Midwestern Forest	JOURNAL OF FISH AND WILDLIFE MANAGEMENT	2018	9	2	485	495	USA	NA	38.6528	-90.8544	Central US forest-grasslands transition	Temperate Grasslands, Savannas & Shrublands	Nearctic	yes
382	Coggins, Lewis G., Jr.; Bacheler, Nathan M.; Gwinn, Daniel C.	Occupancy Models for Monitoring Marine Fish: A Bayesian Hierarchical Approach to Model Imperfect Detection with a Novel Gear Combination	PLOS ONE	2014	9	9			USA	NA	30.93	-80.93		coastal ocean		no
383	Collen, Ben; Howard, Robert; Konie, John; Daniel, Olivia; Rist, Janna	Field surveys for the Endangered pygmy hippopotamus Choeropsis liberiensis in Sapo National Park, Liberia	ORYX	2011	45	1	35	37	Liberia	Africa	5.42	-8.44	Western Guinean lowland forests	Tropical & Subtropical Moist Broadleaf Forests	Afrotropic	no
384	Colyn, R. B.; Radloff, F. G. T.; O'Riain, M. J.	Camera trapping mammals in the scrubland's of the Cape Floristic Kingdom-the importance of effort, spacing and trap placement	BIODIVERSITY AND CONSERVATION	2018	27	2	503	520	South Africa	Africa	-33.96	18.42	Fynbos shrubland	Mediterranean Forests, Woodlands & Scrub	Afrotropic	no
385	Colyn, Robin B.; Campbell, Alastair M.; Smit-Robinson, Hanneline A.	The application of camera trapping to assess Rallidae species richness within palustrine wetland habitat in South Africa	OSTRICH	2017	88	3	235	245	South Africa	Africa	-28.22	29.57	Highveld grasslands	Montane Grasslands & Shrublands	Afrotropic	no
386	Comer, Sarah; Speldewinde, Peter; Tiller, Cameron; Clausen, Lucy; Pinder, Jeff; Cowen, Saul; Algar, Dave	Evaluating the efficacy of a landscape scale feral cat control program using camera traps and occupancy models	SCIENTIFIC REPORTS	2018	8				Australia	Australia	-22.8	119.68	Pilbara shrublands	Deserts & Xeric Shrublands	Australasia	no
387	Conti, L.; Bartolozzi, S.; Iacobelli, S.; Racanelli, V; Guerri, F. Sorbetti	Alarm guard systems for the prevention of damage produced by ungulates in a chestnut grove of Middle Italy	Agronomy Research	2018	16	3	679	687	Italy	Europe	44	11.66	Appenine deciduous montane forests	Temperate Broadleaf & Mixed Forests	Palearctic	yes
388	Contreras-Moreno, Fernando M.; Hidalgo-Mihart, Mircea G.; Jesus-de la Cruz, Alejandro; Juarez-Lopez, Rugieri; Bravata-de la Cruz, Yaribeth; Chahin-Perdomo, Adrian	Seasonal antler cycle in white-tailed deer in Campeche wetlands in Southeastern Mexico	EUROPEAN JOURNAL OF WILDLIFE RESEARCH	2019	65	4			Mexico	NA	18.14	-91.72	Pantanos de Centla	Tropical & Subtropical Moist Broadleaf Forests	Neotropic	no
389	Conway, April; Hernandez, Sonia; Carroll, John P.	Rufous fishing owl Scotopelia ussheri camera-trapped at midday near Tiwai Island, Sierra Leone.	Bulletin of the African Bird Club	2010	17	1	90	91	Sierra Leone	Africa	7.55	11.3167	Western Guinean lowland forests	Tropical & Subtropical Moist Broadleaf Forests	Afrotropic	no
390	Coon, Courtney A. C.; Nichols, Bradley C.; McDonald, Zara; Stoner, David C.	Effects of land-use change and prey abundance on the body condition of an obligate carnivore at the wildland-urban interface	LANDSCAPE AND URBAN PLANNING	2019	192				USA	NA	37.39	-122.36	California interior chaparral and woodlands	Mediterranean Forests, Woodlands & Scrub	Nearctic	no
390	Coon, Courtney A. C.; Nichols, Bradley C.; McDonald, Zara; Stoner, David C.	Effects of land-use change and prey abundance on the body condition of an obligate carnivore at the wildland-urban interface	LANDSCAPE AND URBAN PLANNING	2019	192				USA	NA	37.39	-122.36	Northern California coastal forests	Temperate Conifer Forests	Nearctic
391	Cotsell, Nigel; Vernes, Karl	Camera traps in the canopy: surveying wildlife at tree hollow entrances	Pacific Conservation Biology	2016	22	1	48	60	Australia	Australia	30.318 S	153.128 E	Eastern Australian temperate forests	Temperate Broadleaf & Mixed Forests	Australasia	no
392	Coudrat, C. N. Z.; Nanthavong, C.; Sayavong, S.; Johnson, A.; Johnston, J. B.; Robichaud, W. G.	Conservation importance of Nakai-Nam Theun National Protected Area, Laos, for small carnivores based on camera trap data	RAFFLES BULLETIN OF ZOOLOGY	2014	62		31	49	Laos	Asia	17.97	105.37	Northern Annamites rain forests	Tropical & Subtropical Moist Broadleaf Forests	Indomalayan	no
393	Coudrat, Camille N.Z.; Nanthavong, Chanthalaphone; Sayavong, Sengphachanh; Johnson, Arlyne; Johnston, Jim B.; Robichaud, William G.	Non-Panthera cats in Nakai-Nam Theun National Protected Area, Lao PDR.	Cat News	2014			45	52	Laos	Asia	17.97	105.37	Northern Annamites rain forests	Tropical & Subtropical Moist Broadleaf Forests	Indomalayan	no
394	Coudrat, Camille N.Z.; Nekaris, K. Anne-Isola	Modelling Niche Differentiation of Co-Existing, Elusive and Morphologically Similar Species: A Case Study of Four Macaque Species in Nakai-Nam Theun National Protected Area, Laos.	Animals	2013	3	1	45	62	Laos	Asia	17.97	105.37	Northern Annamites rain forests	Tropical & Subtropical Moist Broadleaf Forests	Indomalayan	no
395	Cove, Michael; Manuel Spinola, R.; Jackson, Victoria L.; Saenz, Joel	Camera trapping ocelots: an evaluation of felid attractants	HYSTRIX-ITALIAN JOURNAL OF MAMMALOGY	2014	25	2	113	116	Costa Rica	NA	10.41	-84.18	Isthmian-Atlantic moist forests	Tropical & Subtropical Moist Broadleaf Forests	Neotropic	no
396	Cove, Michael V.; Fergus, Craig; Lacher, Iara; Akre, Thomas; McShea, William J.	Projecting Mammal Distributions in Response to Future Alternative Landscapes in a Rapidly Transitioning Region	REMOTE SENSING	2019	11	21			USA	NA	38.22	-78.74	Appalachian-Blue Ridge forests	Temperate Broadleaf & Mixed Forests	Nearctic	yes
397	Cove, Michael, V; Simons, Theodore R.; Gardner, Beth; O'Connell, Allan F.	Towards recovery of an endangered island endemic: Distributional and behavioral responses of Key Largo woodrats associated with exotic predator removal	BIOLOGICAL CONSERVATION	2019	237		423	429	USA	NA	25.25	-80.33	Bahamian-Antillean mangroves	Mangroves	Neotropic	no
398	Cove, Michael V.; Maurer, Andrew S.; O'Connell, Allan F.	Camera traps reveal an apparent mutualism between a common mesocarnivore and an endangered ungulate	MAMMALIAN BIOLOGY	2017	87		143	145	USA	NA	24.67	-81.36	Bahamian-Antillean mangroves	Mangroves	Neotropic	no
399	Cove, Michael V.; Simons, Theodore R.; Gardner, Beth; Maurer, Andrew S.; O'Connell, Allan F.	Evaluating nest supplementation as a recovery strategy for the endangered rodents of the Florida Keys	RESTORATION ECOLOGY	2017	25	2	253	260	USA	NA	25.25	-80.33	Bahamian-Antillean mangroves	Mangroves	Neotropic	no
400	Cove, Michael V.; Pardo Vargas, Lain E.; Camilo de la Cruz, Juan; Manuel Spinola, R.; Jackson, Victoria L.; Saenz, Joel C.; Chassot, Olivier	Factors influencing the occurrence of the Endangered Baird's tapir Tapirus bairdii: potential flagship species for a Costa Rican biological corridor	ORYX	2014	48	3	402	409	Costa Rica	NA	10.41	-84.18	Isthmian-Atlantic moist forests	Tropical & Subtropical Moist Broadleaf Forests	Neotropic	no
401	Cove, Michael V.; Spinola, R. Manuel; Jackson, Victoria L.; Saenz, Joel C.; Chassot, Olivier	Integrating occupancy modeling and camera-trap data to estimate medium and large mammal detection and richness in a Central American biological corridor	TROPICAL CONSERVATION SCIENCE	2013	6	6	781	795	Costa Rica	NA	10.41	-84.18	Isthmian-Atlantic moist forests	Tropical & Subtropical Moist Broadleaf Forests	Neotropic	no
402	Cove, Michael V.; Jones, Brandon M.; Bossert, Aaron; Clever, Donald R., Jr.; Dunwoody, Ryan K.; White, Bryan C.; Jackson, Victoria L.	Use of Camera Traps to Examine the Mesopredator Release Hypothesis in a Fragmented Midwestern Landscape	AMERICAN MIDLAND NATURALIST	2012	168	2	456	465	USA	NA	38.9097	-94.4697	Central Tallgrass prairie	Temperate Grasslands, Savannas & Shrublands	Nearctic	yes
403	Coverdale, Tyler C.; Kartzinel, Tyler R.; Grabowski, Kathryn L.; Shriver, Robert K.; Hassan, Abdikadir A.; Goheen, Jacob R.; Palmer, Todd M.; Pringle, Robert M.	Elephants in the understory: opposing direct and indirect effects of consumption and ecosystem engineering by megaherbivores	ECOLOGY	2016	97	11	3219	3230	Kenya	Africa	0.29	36.9	Northern Acacia-Commiphora bushlands and thickets	Tropical & Subtropical Grasslands, Savannas & Shrublands	Afrotropic	no
404	Crego, Ramiro D.; Jimenez, Jaime E.; Rozzi, Ricardo	Potential niche expansion of the American mink invading a remote island free of native-predatory mammals	PLOS ONE	2018	13	4			Chile	SA	55°S	68°W	Magellanic subpolar forests	Temperate Broadleaf & Mixed Forests	Neotropic	no
405	Croes, Barbara; Rasmussen, Gregory; Buij, Ralph; de Iongh, Hans	Status of the African wild dog in the Benoue Complex, North Cameroon.	Canid News	2012	15	1	1	3	Cameroon	Africa	8.31	13.88	Northern Congolian Forest-Savanna	Tropical & Subtropical Grasslands, Savannas & Shrublands	Afrotropic	no
406	Cronk, Nadine Elizabeth; Pillay, Neville	Flexible Use of Urban Resources by the Yellow Mongoose Cynictis penicillata	ANIMALS	2019	9	7			Democratic Republic of Congo		6°17?10.4?S	28°05?14.7?E	Central Zambezian wet miombo woodlands	Tropical & Subtropical Grasslands, Savannas & Shrublands	Afrotropic	no
408	Crook, Natasha; Cairns, Stuart C.; Vernes, Karl	Bare-nosed wombats (Vombatus ursinus) use drainage culverts to cross roads	AUSTRALIAN MAMMALOGY	2013	35	1	23	29	Australia	Australia	-31.6333	151.967	Eastern Australian temperate forests	Temperate Broadleaf & Mixed Forests	Australasia	yes
409	Croose, Elizabeth; Bled, Florent; Fowler, Nicholas L.; Beyer, Dean E., Jr.; Belant, Jerrold L.	American marten and fisher do not segregate in space and time during winter in a mixed-forest system	ECOLOGY AND EVOLUTION	2019	9	8	4906	4916	USA	NA	46°15?N	88°14?W	Western Great Lakes forests	Temperate Broadleaf & Mixed Forests	Nearctic	no
410	Crowley, Shannon M.; Hodder, Dexter P.	An assessment of the efficacy of rub stations for detection and abundance surveys of Canada lynx (Lynx canadensis)	CANADIAN JOURNAL OF ZOOLOGY	2017	95	11	885	890	Canada	NA	54.64	-124.4	Central British Columbia Mountain forests	Temperate Conifer Forests	Nearctic	no
411	Crowley, Shannon M.; Hodder, Dexter P.; Larsen, Karl W.	Canada Lynx (Lynx canadensis) Detection and Behaviour Using Remote Cameras during the Breeding Season	Canadian Field-Naturalist	2013	127	4	310	318	Canada	NA	54.64	-124.4	Central British Columbia Mountain forests	Temperate Conifer Forests	Nearctic	no
412	Crunchant, Anne-Sophie; Egerer, Monika; Loos, Alexander; Burghardt, Tilo; Zuberbuhler, Klaus; Corogenes, Katherine; Leinert, Vera; Kulik, Lars; Kuehl, Hjalmar S.	Automated face detection for occurrence and occupancy estimation in chimpanzees	AMERICAN JOURNAL OF PRIMATOLOGY	2017	79	3			Uganda	Africa	2°03?N	31°46?E	Albertine Rift montane forests	Tropical & Subtropical Moist Broadleaf Forests	Afrotropic	no
412	Crunchant, Anne-Sophie; Egerer, Monika; Loos, Alexander; Burghardt, Tilo; Zuberbuhler, Klaus; Corogenes, Katherine; Leinert, Vera; Kulik, Lars; Kuehl, Hjalmar S.	Automated face detection for occurrence and occupancy estimation in chimpanzees	AMERICAN JOURNAL OF PRIMATOLOGY	2017	79	3			Liberia	Africa	5°50?N	8°24?W	Western Guinean lowland forests	Tropical & Subtropical Moist Broadleaf Forests	Afrotropic	no
413	Cruz, Paula; Eugenia Iezzi, Maria; De Angelo, Carlos; Varela, Diego; Di Bitetti, Mario S.; Pavioio, Agustin	Effects of human impacts on habitat use, activity patterns and ecological relationships among medium and small felids of the Atlantic Forest	PLOS ONE	2018	13	8			Argentina	SA	54°15'30.60"W	25°55'52.32"S	Alto Paraná Atlantic forests	Tropical & Subtropical Moist Broadleaf Forests	Neotropic	no
414	Cruz, Paula; Paviolo, Agustin; Bo, Roberto F.; Thompson, Jeffrey J.; Di Bitetti, Mario S.	Daily activity patterns and habitat use of the lowland tapir (Tapirus terrestris) in the Atlantic Forest	MAMMALIAN BIOLOGY	2014	79	6	376	383	Argentina	SA	25?58 S	54?06 W	Alto Paraná Atlantic forests	Tropical & Subtropical Moist Broadleaf Forests	Neotropic	no
415	Cuellar, Rosa L.; Alarcon, Daniel; Pena, Froilan; Romero-Munoz, Alfredo; Maffei, Leonardo; Rumiz, Damian; Noss, Andrew	Kaaiyana, a jaguar with cubs in the Kaa-Iya del Gran Chaco National Park, Bolivia.	Cat News	2012	57		4	6	Bolivia	SA	-18.5	-61.93	Dry Chaco	Tropical & Subtropical Grasslands, Savannas & Shrublands	Neotropic	no
416	Cunningham, Calum X.; Johnson, Christopher N.; Barmuta, Leon A.; Hollings, Tracey; Woehler, Eric J.; Jones, Menna E.	Top carnivore decline has cascading effects on scavengers and carrion persistence	PROCEEDINGS OF THE ROYAL SOCIETY B-BIOLOGICAL SCIENCES	2018	285	###			Australia	Australia	-41.23	146.28	Tasmanian temperate rain forests	Temperate Broadleaf & Mixed Forests	Australasia	no
416	Cunningham, Calum X.; Johnson, Christopher N.; Barmuta, Leon A.; Hollings, Tracey; Woehler, Eric J.; Jones, Menna E.	Top carnivore decline has cascading effects on scavengers and carrion persistence	PROCEEDINGS OF THE ROYAL SOCIETY B-BIOLOGICAL SCIENCES	2018	285	###			Australia	Australia	-41.23	146.28	Tasmanian temperate forests	Temperate Broadleaf & Mixed Forests	Australasia	no
417	Curtis, Paul D.; Boldgiv, Bazartseren; Mattison, Peter M.; Boulanger, Jason R.	Estimating deer abundance in suburban areas with infrared-triggered cameras	Human-Wildlife Conflicts	2009	3	1	116	128	USA	NA	42.47	-76.48	Allegheny Highlands forests	Temperate Broadleaf & Mixed Forests	Nearctic	yes
418	Cusack, Jeremy J.; Dickman, Amy J.; Kalyahe, Monty; Rowcliffe, J. Marcus; Carbone, Chris; MacDonald, David W.; Coulson, Tim	Revealing kleptoparasitic and predatory tendencies in an African mammal community using camera traps: a comparison of spatiotemporal approaches	OIKOS	2017	126	6	812	822	Tanzania	Africa	-7.6	34.82	Southern Acacia-Commiphora bushlands and thickets	Tropical & Subtropical Grasslands, Savannas & Shrublands	Afrotropic	no
418	Cusack, Jeremy J.; Dickman, Amy J.; Kalyahe, Monty; Rowcliffe, J. Marcus; Carbone, Chris; MacDonald, David W.; Coulson, Tim	Revealing kleptoparasitic and predatory tendencies in an African mammal community using camera traps: a comparison of spatiotemporal approaches	OIKOS	2017	126	6	812	822	Tanzania	Africa	-7.6	34.82	Dry miombo woodlands	Tropical & Subtropical Grasslands, Savannas & Shrublands	Afrotropic
419	Cusack, Jeremy J.; Swanson, Alexandra; Coulson, Tim; Packer, Craig; Carbone, Chris; Dickman, Amy J.; Kosmala, Margaret; Lintott, Chris; Rowcliffe, J. Marcus	Applying a random encounter model to estimate lion density from camera traps in Serengeti National Park, Tanzania	JOURNAL OF WILDLIFE MANAGEMENT	2015	79	6	1014	1021	Tanzania	Africa	-2.59	35.02	Southern Acacia-Commiphora bushlands and thickets	Tropical & Subtropical Grasslands, Savannas & Shrublands	Afrotropic	no
420	Cusack, Jeremy J.; Dickman, Amy J.; Rowcliffe, J. Marcus; Carbone, Chris; Macdonald, David W.; Coulson, Tim	Random versus Game Trail-Based Camera Trap Placement Strategy for Monitoring Terrestrial Mammal Communities	PLOS ONE	2015	10	5			Tanzania	Africa	7°42’ S	34°59’ E	Southern Acacia-Commiphora bushlands and thickets	Tropical & Subtropical Grasslands, Savannas & Shrublands	Afrotropic	no
420	Cusack, Jeremy J.; Dickman, Amy J.; Rowcliffe, J. Marcus; Carbone, Chris; Macdonald, David W.; Coulson, Tim	Random versus Game Trail-Based Camera Trap Placement Strategy for Monitoring Terrestrial Mammal Communities	PLOS ONE	2015	10	5			Tanzania	Africa	7°42’ S	34°59’ E	Dry miombo woodlands	Tropical & Subtropical Grasslands, Savannas & Shrublands	Afrotropic
422	Cuyckens, Griet A.E.; Perovic, Pablo G.; Rojo, Julio	Geoffroy's cat in Salta Province, a potentially interesting area for subspecies.	Cat News	2012	57		12	13	Argentina	SA	64.79435°W	24.99198°S	Southern Andean Yungas	Tropical & Subtropical Moist Broadleaf Forests	Neotropic	no
423	da Rocha, Daniel Gomes; Sollmann, Rahel; Ramalho, Emiliano Esterci; Ilha, Renata; Tan, Cedric K. W.	Ocelot (Leopardus pardalis) Density in Central Amazonia	PLOS ONE	2016	11	5			Brazil	SA	2° 21’S	64°16’W	Japurá-Solimões-Negro moist forests	Tropical & Subtropical Moist Broadleaf Forests	Neotropic	no
424	da Rocha, Daniel Gomes; Ramalho, Emiliano Esterci; Alvarenga, Guilherme Costa; Grabin, Diogo Maia; Magnusson, William Ernest	Records of the bush dog (Speothos venaticus) in Central Amazonia, Brazil	JOURNAL OF MAMMALOGY	2015	96	6	1361	1364	Brazil	SA	2°21?S	64°16?W	Japurá-Solimões-Negro moist forests	Tropical & Subtropical Moist Broadleaf Forests	Neotropic	no
425	da Rosa, Clarissa Alves; Hobus, Quelen; Bager, Alex	Mammalia, Pilosa, Myrmecophagidae, Tamandua tetradactyla (Linnaeus, 1758): distribution extension.	Check List	2010	6	1	52	53	Brazil	SA	31°58’19” S	52°17’58” W	Uruguayan Savanna	Tropical & Subtropical Grasslands, Savannas & Shrublands	Neotropic	no
426	Da Silva, Juliano Z.; Dos Reis, Mauricio S.	Consumption of Euterpe edulis fruit by wildlife: implications for conservation and management of the Southern Brazilian Atlantic Forest	ANAIS DA ACADEMIA BRASILEIRA DE CIENCIAS	2019	91	1			Brazil	SA	-27.04	-49.47	Serra do Mar coastal forests	Tropical & Subtropical Moist Broadleaf Forests	Neotropic	no
428	Dahl, Fredrik; Ahlen, Per-Arne	Nest predation by raccoon dog Nyctereutes procyonoides in the archipelago of northern Sweden	BIOLOGICAL INVASIONS	2019	21	3	743	755	Sweden	Europe	65.74	23.73	Scandinavian and Russian taiga	Boreal Forests/Taiga	Palearctic	no
429	Dalloz, Matheus Fernandes; Loretto, Diogo; Papi, Bernardo; Cobra, Priscilla; Vieira, Marcus Vinicius	Positional behaviour and tail use by the bare-tailed woolly opossum Caluromys philander (Didelphimorphia, Didelphidae)	MAMMALIAN BIOLOGY	2012	77	5	307	313	Brazil	SA	22°28'28"S	43°00'26"W	Serra do Mar coastal forests	Tropical & Subtropical Moist Broadleaf Forests	Neotropic	no
430	Damm, Philip E.; Grand, James B.; Barnett, Steven W.	Variation in Detection Among Passive Infrared Triggered-cameras Used in Wildlife Research.	Proceedings of the Annual Conference Southeastern Association of Fish and Wildlife Agencies	2010	64		125	130	USA	NA	31.12	-86.76	Southeast US conifer savannas	Temperate Grasslands, Savannas & Shrublands	Nearctic	no
431	Daniel Hernandez-Flores, Sergio; Vargas-Licona, Guadalupe; Sanchez-Rojas, Gerardo	First records of the Ocelot (Leopardus pardalis) in the state of Hidalgo, Mexico	Therya	2013	4	1	99	102	Mexico	NA	20.6906	-98.6403	Veracruz montane forests	Tropical & Subtropical Moist Broadleaf forests	Neotropic	no
431	Daniel Hernandez-Flores, Sergio; Vargas-Licona, Guadalupe; Sanchez-Rojas, Gerardo	First records of the Ocelot (Leopardus pardalis) in the state of Hidalgo, Mexico	Therya	2013	4	1	99	102	Mexico	NA	20.6403	-98.6914	Sierra Madre Oriental pine-oak forests	Tropical & Subtropical Coniferous Forests	Nearctic	no
432	Daniels, Kelly; Hagan, Donald; Jachowski, David	Habitat fragmentation, low seed germination rates, and herbivory impede conservation efforts for a prairie relict wildflower	JOURNAL OF THE TORREY BOTANICAL SOCIETY	2018	145	2	121	125	USA	NA	34.73	-82.85	Appalachian Piedmont forests	Temperate Broadleaf & Mixed Forests	Nearctic	no
433	Danielson, WR; Degraaf, RM; Fuller, TK	An inexpensive compact automatic camera system for wildlife research	JOURNAL OF FIELD ORNITHOLOGY	1996	67	3	414	421
434	Datta, Aparjita; Naniwadekar, Rohit; Anand, M.O.	Occurrence and conservation status of small carnivores in two protected areas in Arunachal Pradesh, north-east India.	Small Carnivore Conservation	2008	39		1	10	India	Asia	27.55	96.42	Eastern Himalayan broadleaf forests	Temperate Broadleaf & Mixed Forests	Indomalayan	no
435	Davies, Andrew B.; Tambling, Craig J.; Kerley, Graham I. H.; Asner, Gregory P.	Limited spatial response to direct predation risk by African herbivores following predator reintroduction	ECOLOGY AND EVOLUTION	2016	6	16	5728	5748	South Africa	Africa	33°20'S	25°50'E	Fynbos shrubland	Mediterranean Forests, Woodlands & Scrub	Afrotropic	no
436	Davis, Amy J.; McCreary, Ryan; Psiropoulos, Jeremiah; Brennan, Gary; Cox, Terry; Partin, Andrew; Pepin, Kim M.	Quantifying site-level usage and certainty of absence for an invasive species through occupancy analysis of camera-trap data	BIOLOGICAL INVASIONS	2018	20	4	877	890	USA	NA	32.77	-116.67	California coastal sage and chaparral	Mediterranean Forests, Woodlands & Scrub	Nearctic	yes
437	Davis, Courtney L.; Rich, Lindsey N.; Farris, Zach J.; Kelly, Marcella J.; Di Bitetti, Mario S.; Di Blanco, Yamil; Albanesi, Sebastian; Farhadinia, Mohammad S.; Gholikhani, Navid; Hamel, Sandra; Harmsen, Bart J.; Wultsch, Claudia; Kane, Mamadou D.; Martins, Quinton; Murphy, Asia J.; Steenweg, Robin; Sunarto, Sunarto; Taktehrani, Atieh; Thapa, Kanchan; Tucker, Jody M.; Whittington, Jesse; Widodo, …	Ecological correlates of the spatial co-occurrence of sympatric mammalian carnivores worldwide	ECOLOGY LETTERS	2018	21	9	1401	1412	Canada	NA	51.4	-116.26	Northern Rockies conifer forests	Temperate Conifer Forests	Nearctic	no
437	Davis, Courtney L.; Rich, Lindsey N.; Farris, Zach J.; Kelly, Marcella J.; Di Bitetti, Mario S.; Di Blanco, Yamil; Albanesi, Sebastian; Farhadinia, Mohammad S.; Gholikhani, Navid; Hamel, Sandra; Harmsen, Bart J.; Wultsch, Claudia; Kane, Mamadou D.; Martins, Quinton; Murphy, Asia J.; Steenweg, Robin; Sunarto, Sunarto; Taktehrani, Atieh; Thapa, Kanchan; Tucker, Jody M.; Whittington, Jesse; Widodo, …	Ecological correlates of the spatial co-occurrence of sympatric mammalian carnivores worldwide	ECOLOGY LETTERS	2018	21	9	1401	1412	USA	NA	38.06	-119.53	Sierra Nevada forests	Temperate Conifer Forests	Nearctic
437	Davis, Courtney L.; Rich, Lindsey N.; Farris, Zach J.; Kelly, Marcella J.; Di Bitetti, Mario S.; Di Blanco, Yamil; Albanesi, Sebastian; Farhadinia, Mohammad S.; Gholikhani, Navid; Hamel, Sandra; Harmsen, Bart J.; Wultsch, Claudia; Kane, Mamadou D.; Martins, Quinton; Murphy, Asia J.; Steenweg, Robin; Sunarto, Sunarto; Taktehrani, Atieh; Thapa, Kanchan; Tucker, Jody M.; Whittington, Jesse; Widodo, …	Ecological correlates of the spatial co-occurrence of sympatric mammalian carnivores worldwide	ECOLOGY LETTERS	2018	21	9	1401	1412	Belize	SA	17.39	-88.96	Petén-Veracruz moist forests	Tropical & Subtropical Moist Broadleaf Forests	Neotropic
437	Davis, Courtney L.; Rich, Lindsey N.; Farris, Zach J.; Kelly, Marcella J.; Di Bitetti, Mario S.; Di Blanco, Yamil; Albanesi, Sebastian; Farhadinia, Mohammad S.; Gholikhani, Navid; Hamel, Sandra; Harmsen, Bart J.; Wultsch, Claudia; Kane, Mamadou D.; Martins, Quinton; Murphy, Asia J.; Steenweg, Robin; Sunarto, Sunarto; Taktehrani, Atieh; Thapa, Kanchan; Tucker, Jody M.; Whittington, Jesse; Widodo, …	Ecological correlates of the spatial co-occurrence of sympatric mammalian carnivores worldwide	ECOLOGY LETTERS	2018	21	9	1401	1412	Argentina	SA	-26.89	102.33+L2050:M2067	Alto Paraná Atlantic forests	Tropical & Subtropical Moist Broadleaf Forests	Neotropic
437	Davis, Courtney L.; Rich, Lindsey N.; Farris, Zach J.; Kelly, Marcella J.; Di Bitetti, Mario S.; Di Blanco, Yamil; Albanesi, Sebastian; Farhadinia, Mohammad S.; Gholikhani, Navid; Hamel, Sandra; Harmsen, Bart J.; Wultsch, Claudia; Kane, Mamadou D.; Martins, Quinton; Murphy, Asia J.; Steenweg, Robin; Sunarto, Sunarto; Taktehrani, Atieh; Thapa, Kanchan; Tucker, Jody M.; Whittington, Jesse; Widodo, …	Ecological correlates of the spatial co-occurrence of sympatric mammalian carnivores worldwide	ECOLOGY LETTERS	2018	21	9	1401	1412	Argentina	SA	-23.19	-64.57	Southern Andean Yungas	Tropical & Subtropical Moist Broadleaf Forests	Neotropic
437	Davis, Courtney L.; Rich, Lindsey N.; Farris, Zach J.; Kelly, Marcella J.; Di Bitetti, Mario S.; Di Blanco, Yamil; Albanesi, Sebastian; Farhadinia, Mohammad S.; Gholikhani, Navid; Hamel, Sandra; Harmsen, Bart J.; Wultsch, Claudia; Kane, Mamadou D.; Martins, Quinton; Murphy, Asia J.; Steenweg, Robin; Sunarto, Sunarto; Taktehrani, Atieh; Thapa, Kanchan; Tucker, Jody M.; Whittington, Jesse; Widodo, …	Ecological correlates of the spatial co-occurrence of sympatric mammalian carnivores worldwide	ECOLOGY LETTERS	2018	21	9	1401	1412	Senegal	Africa	13.02	-13.19	West Sudanian savanna	Tropical & Subtropical Grasslands, Savannas & Shrublands	Afrotropic
437	Davis, Courtney L.; Rich, Lindsey N.; Farris, Zach J.; Kelly, Marcella J.; Di Bitetti, Mario S.; Di Blanco, Yamil; Albanesi, Sebastian; Farhadinia, Mohammad S.; Gholikhani, Navid; Hamel, Sandra; Harmsen, Bart J.; Wultsch, Claudia; Kane, Mamadou D.; Martins, Quinton; Murphy, Asia J.; Steenweg, Robin; Sunarto, Sunarto; Taktehrani, Atieh; Thapa, Kanchan; Tucker, Jody M.; Whittington, Jesse; Widodo, …	Ecological correlates of the spatial co-occurrence of sympatric mammalian carnivores worldwide	ECOLOGY LETTERS	2018	21	9	1401	1412	Senegal	Africa	13.02	-13.19	Guinean forest-savanna	Tropical & Subtropical Grasslands, Savannas & Shrublands	Afrotropic
437	Davis, Courtney L.; Rich, Lindsey N.; Farris, Zach J.; Kelly, Marcella J.; Di Bitetti, Mario S.; Di Blanco, Yamil; Albanesi, Sebastian; Farhadinia, Mohammad S.; Gholikhani, Navid; Hamel, Sandra; Harmsen, Bart J.; Wultsch, Claudia; Kane, Mamadou D.; Martins, Quinton; Murphy, Asia J.; Steenweg, Robin; Sunarto, Sunarto; Taktehrani, Atieh; Thapa, Kanchan; Tucker, Jody M.; Whittington, Jesse; Widodo, …	Ecological correlates of the spatial co-occurrence of sympatric mammalian carnivores worldwide	ECOLOGY LETTERS	2018	21	9	1401	1412	Botswana	Africa	-19.51	23.61	Zambezian flooded grasslands	Flooded Grasslands & Savannas	Afrotropic
437	Davis, Courtney L.; Rich, Lindsey N.; Farris, Zach J.; Kelly, Marcella J.; Di Bitetti, Mario S.; Di Blanco, Yamil; Albanesi, Sebastian; Farhadinia, Mohammad S.; Gholikhani, Navid; Hamel, Sandra; Harmsen, Bart J.; Wultsch, Claudia; Kane, Mamadou D.; Martins, Quinton; Murphy, Asia J.; Steenweg, Robin; Sunarto, Sunarto; Taktehrani, Atieh; Thapa, Kanchan; Tucker, Jody M.; Whittington, Jesse; Widodo, …	Ecological correlates of the spatial co-occurrence of sympatric mammalian carnivores worldwide	ECOLOGY LETTERS	2018	21	9	1401	1412	Botswana	Africa	-19.51	23.61	Zambezian mopane woodlands	Tropical & Subtropical Grasslands, Savannas & Shrublands	Afrotropic
437	Davis, Courtney L.; Rich, Lindsey N.; Farris, Zach J.; Kelly, Marcella J.; Di Bitetti, Mario S.; Di Blanco, Yamil; Albanesi, Sebastian; Farhadinia, Mohammad S.; Gholikhani, Navid; Hamel, Sandra; Harmsen, Bart J.; Wultsch, Claudia; Kane, Mamadou D.; Martins, Quinton; Murphy, Asia J.; Steenweg, Robin; Sunarto, Sunarto; Taktehrani, Atieh; Thapa, Kanchan; Tucker, Jody M.; Whittington, Jesse; Widodo, …	Ecological correlates of the spatial co-occurrence of sympatric mammalian carnivores worldwide	ECOLOGY LETTERS	2018	21	9	1401	1412	South Africa	Africa	-32.3	19.1	Fynbos shrubland	Mediterranean Forests, Woodlands & Scrub	Afrotropic
437	Davis, Courtney L.; Rich, Lindsey N.; Farris, Zach J.; Kelly, Marcella J.; Di Bitetti, Mario S.; Di Blanco, Yamil; Albanesi, Sebastian; Farhadinia, Mohammad S.; Gholikhani, Navid; Hamel, Sandra; Harmsen, Bart J.; Wultsch, Claudia; Kane, Mamadou D.; Martins, Quinton; Murphy, Asia J.; Steenweg, Robin; Sunarto, Sunarto; Taktehrani, Atieh; Thapa, Kanchan; Tucker, Jody M.; Whittington, Jesse; Widodo, …	Ecological correlates of the spatial co-occurrence of sympatric mammalian carnivores worldwide	ECOLOGY LETTERS	2018	21	9	1401	1412	Madagascar	Africa	-15.37	49.83	Madagascar humid forests	Tropical & Subtropical Moist Broadleaf Forests	Afrotropic
437	Davis, Courtney L.; Rich, Lindsey N.; Farris, Zach J.; Kelly, Marcella J.; Di Bitetti, Mario S.; Di Blanco, Yamil; Albanesi, Sebastian; Farhadinia, Mohammad S.; Gholikhani, Navid; Hamel, Sandra; Harmsen, Bart J.; Wultsch, Claudia; Kane, Mamadou D.; Martins, Quinton; Murphy, Asia J.; Steenweg, Robin; Sunarto, Sunarto; Taktehrani, Atieh; Thapa, Kanchan; Tucker, Jody M.; Whittington, Jesse; Widodo, …	Ecological correlates of the spatial co-occurrence of sympatric mammalian carnivores worldwide	ECOLOGY LETTERS	2018	21	9	1401	1412	Norway	Europe	70.08	24.64	Scandinavian Montane Birch forest and grasslands	Tundra	Palearctic
437	Davis, Courtney L.; Rich, Lindsey N.; Farris, Zach J.; Kelly, Marcella J.; Di Bitetti, Mario S.; Di Blanco, Yamil; Albanesi, Sebastian; Farhadinia, Mohammad S.; Gholikhani, Navid; Hamel, Sandra; Harmsen, Bart J.; Wultsch, Claudia; Kane, Mamadou D.; Martins, Quinton; Murphy, Asia J.; Steenweg, Robin; Sunarto, Sunarto; Taktehrani, Atieh; Thapa, Kanchan; Tucker, Jody M.; Whittington, Jesse; Widodo, …	Ecological correlates of the spatial co-occurrence of sympatric mammalian carnivores worldwide	ECOLOGY LETTERS	2018	21	9	1401	1412	Iran	Asia	32.7	53.96	Central Persian desert basins	Deserts & Xeric Shrublands	Palearctic
437	Davis, Courtney L.; Rich, Lindsey N.; Farris, Zach J.; Kelly, Marcella J.; Di Bitetti, Mario S.; Di Blanco, Yamil; Albanesi, Sebastian; Farhadinia, Mohammad S.; Gholikhani, Navid; Hamel, Sandra; Harmsen, Bart J.; Wultsch, Claudia; Kane, Mamadou D.; Martins, Quinton; Murphy, Asia J.; Steenweg, Robin; Sunarto, Sunarto; Taktehrani, Atieh; Thapa, Kanchan; Tucker, Jody M.; Whittington, Jesse; Widodo, …	Ecological correlates of the spatial co-occurrence of sympatric mammalian carnivores worldwide	ECOLOGY LETTERS	2018	21	9	1401	1412	Iran	Asia	32.7	53.96	Kuh Rud and Eastern Iran montane woodlands	Montane Grasslands & Shrublands	Palearctic
437	Davis, Courtney L.; Rich, Lindsey N.; Farris, Zach J.; Kelly, Marcella J.; Di Bitetti, Mario S.; Di Blanco, Yamil; Albanesi, Sebastian; Farhadinia, Mohammad S.; Gholikhani, Navid; Hamel, Sandra; Harmsen, Bart J.; Wultsch, Claudia; Kane, Mamadou D.; Martins, Quinton; Murphy, Asia J.; Steenweg, Robin; Sunarto, Sunarto; Taktehrani, Atieh; Thapa, Kanchan; Tucker, Jody M.; Whittington, Jesse; Widodo, …	Ecological correlates of the spatial co-occurrence of sympatric mammalian carnivores worldwide	ECOLOGY LETTERS	2018	21	9	1401	1412	Iran	Asia	32.7	53.96	Elburz Range forest steppe	Temperate Conifer Forests	Palearctic
437	Davis, Courtney L.; Rich, Lindsey N.; Farris, Zach J.; Kelly, Marcella J.; Di Bitetti, Mario S.; Di Blanco, Yamil; Albanesi, Sebastian; Farhadinia, Mohammad S.; Gholikhani, Navid; Hamel, Sandra; Harmsen, Bart J.; Wultsch, Claudia; Kane, Mamadou D.; Martins, Quinton; Murphy, Asia J.; Steenweg, Robin; Sunarto, Sunarto; Taktehrani, Atieh; Thapa, Kanchan; Tucker, Jody M.; Whittington, Jesse; Widodo, …	Ecological correlates of the spatial co-occurrence of sympatric mammalian carnivores worldwide	ECOLOGY LETTERS	2018	21	9	1401	1412	Nepal	Asia	27.53	84.49	Terai-Duar savanna and grasslands	Tropical & Subtropical Grasslands, Savannas & Shrublands	Indomalayan
437	Davis, Courtney L.; Rich, Lindsey N.; Farris, Zach J.; Kelly, Marcella J.; Di Bitetti, Mario S.; Di Blanco, Yamil; Albanesi, Sebastian; Farhadinia, Mohammad S.; Gholikhani, Navid; Hamel, Sandra; Harmsen, Bart J.; Wultsch, Claudia; Kane, Mamadou D.; Martins, Quinton; Murphy, Asia J.; Steenweg, Robin; Sunarto, Sunarto; Taktehrani, Atieh; Thapa, Kanchan; Tucker, Jody M.; Whittington, Jesse; Widodo, …	Ecological correlates of the spatial co-occurrence of sympatric mammalian carnivores worldwide	ECOLOGY LETTERS	2018	21	9	1401	1412	Nepal	Asia	27.53	84.49	Himalayan subtropical broadleaf forests	Tropical & Subtropical Moist Broadleaf Forests	Indomalayan
437	Davis, Courtney L.; Rich, Lindsey N.; Farris, Zach J.; Kelly, Marcella J.; Di Bitetti, Mario S.; Di Blanco, Yamil; Albanesi, Sebastian; Farhadinia, Mohammad S.; Gholikhani, Navid; Hamel, Sandra; Harmsen, Bart J.; Wultsch, Claudia; Kane, Mamadou D.; Martins, Quinton; Murphy, Asia J.; Steenweg, Robin; Sunarto, Sunarto; Taktehrani, Atieh; Thapa, Kanchan; Tucker, Jody M.; Whittington, Jesse; Widodo, …	Ecological correlates of the spatial co-occurrence of sympatric mammalian carnivores worldwide	ECOLOGY LETTERS	2018	21	9	1401	1412	Indonesia	Asia	-0.31	102.33	Sumatran lowland rain forests	Tropical & Subtropical Moist Broadleaf Forests	Indomalayan
437	Davis, Courtney L.; Rich, Lindsey N.; Farris, Zach J.; Kelly, Marcella J.; Di Bitetti, Mario S.; Di Blanco, Yamil; Albanesi, Sebastian; Farhadinia, Mohammad S.; Gholikhani, Navid; Hamel, Sandra; Harmsen, Bart J.; Wultsch, Claudia; Kane, Mamadou D.; Martins, Quinton; Murphy, Asia J.; Steenweg, Robin; Sunarto, Sunarto; Taktehrani, Atieh; Thapa, Kanchan; Tucker, Jody M.; Whittington, Jesse; Widodo, …	Ecological correlates of the spatial co-occurrence of sympatric mammalian carnivores worldwide	ECOLOGY LETTERS	2018	21	9	1401	1412	Indonesia	Asia	-0.31	102.33	Sumatran peat swamp forests	Tropical & Subtropical Moist Broadleaf Forests	Indomalayan
438	Davis, M. L.; Kelly, M. J.; Stauffer, D. F.	Carnivore co-existence and habitat use in the Mountain Pine Ridge Forest Reserve, Belize	ANIMAL CONSERVATION	2011	14	1	56	65	Belize	SA	16.94	-88.95	Belizian pine savannas	Tropical & Subtropical Grasslands, Savannas & Shrublands	Neotropic	no
439	Dawson, Stuart J.; Adams, Peter J.; Moseby, Katherine E.; Waddington, Kris I.; Kobryn, Halina T.; Bateman, Philip W.; Fleming, Patricia A.	Peak hour in the bush: linear anthropogenic clearings funnel predator and prey species	AUSTRAL ECOLOGY	2018	43	2	159	171	Australia	Australia	-17.6	124.17	Kimberly tropical savanna	Tropical & Subtropical Grasslands, Savannas & Shrublands	Australasia	yes
439	Dawson, Stuart J.; Adams, Peter J.; Moseby, Katherine E.; Waddington, Kris I.; Kobryn, Halina T.; Bateman, Philip W.; Fleming, Patricia A.	Peak hour in the bush: linear anthropogenic clearings funnel predator and prey species	AUSTRAL ECOLOGY	2018	43	2	159	171	Australia	Australia	-17.6	124.17	Great Sandy-Tanami desert	Deserts & Xeric Shrublands	Australasia
439	Dawson, Stuart J.; Adams, Peter J.; Moseby, Katherine E.; Waddington, Kris I.; Kobryn, Halina T.; Bateman, Philip W.; Fleming, Patricia A.	Peak hour in the bush: linear anthropogenic clearings funnel predator and prey species	AUSTRAL ECOLOGY	2018	43	2	159	171	Australia	Australia	-17.6	124.17	Victoria Plains tropical savanna	Tropical & Subtropical Grasslands, Savannas & Shrublands	Australasia
440	Day, Casey C.; Westover, Matthew D.; Hall, Lucas K.; Larsen, Randy T.; McMillan, Brock R.	Comparing direct and indirect methods to estimate detection rates and site use of a cryptic semi-aquatic carnivore	ECOLOGICAL INDICATORS	2016	66		230	234	USA	NA	40?30?26??N	111?26?59??W	Wasatch and Uinta montane forests	Temperate Conifer Forests	Nearctic	no
441	de Almeida Jacomo, Anah Tereza; Silveira, Leandro; Diniz-Filho, Jose Alexandre Felizola	Niche separation between the maned wolf (Chrysocyon brachyurus), the crab-eating fox (Dusicyon thous) and the hoary fox (Dusicyon vetulus) in central Brazil.	Journal of Zoology (London)	2004	262	1	99	106	Brazil	SA	18°19' S	52°45' W	Cerrado	Tropical & Subtropical Grasslands, Savannas & Shrublands	Neotropic	no
442	de Andrade Silva, Katyucha Von Kossel; Kenup, Caio Fittipaldi; Kreischer, Catharina; Fernandez, Fernando A. S.; Pires, Alexandra S.	Who let the dogs out? Occurrence, population size and daily activity of domestic dogs in an urban Atlantic Forest reserve	PERSPECTIVES IN ECOLOGY AND CONSERVATION	2018	16	4	228	233	Brazil	SA	-22.96	-43.25	Serra do Mar coastal forests	Tropical & Subtropical Moist Broadleaf Forests	Neotropic	no
443	De Beenhouwer, Matthias; Mertens, Jan; Habtamu, Tadese	Camera trap observation of crested rat (Lophiomys imhausi, Muroidea: Rodentia) in Belete-Gera montane rainforest, south-western Ethiopia	AFRICAN JOURNAL OF ECOLOGY	2016	54	1	111	113	Ethiopia	Africa	7°47'29?N	36°19'30"E	Ethiopian montane forests	Tropical & Subtropical Moist Broadleaf Forests	Afrotropic	no
444	De Bondi, Natasha; White, John G.; Stevens, Mike; Cooke, Raylene	A comparison of the effectiveness of camera trapping and live trapping for sampling terrestrial small-mammal communities	WILDLIFE RESEARCH	2010	37	6	456	465	Australia	Australia	37° S	142° 4' E	Southeast Australia temperate forests	Temperate Broadleaf & Mixed Forests	Australasia	no
445	de Campos, Claudia Bueno; Esteves, Carolina Franco; Dias, Douglas de Matos; Guimaraes Rodrigues, Flavio Henrique	Medium and large sized mammals of the Boqueirao da Onca, North of Bahia State, Brazil	Papeis Avulsos de Zoologia (Sao Paulo)	2019	59		e20195912	Article No.: e20195912	Brazil	SA	-10.31	-41.35	Caatinga	Tropical & Subtropical Dry Broadleaf Forests	Neotropic	no
446	de Iongh, Hans H.; Bauer, Hans; Tumenta, Pricelia; Schoe, Marjolein; Sogbosossou, Etotepe; Gueye, Malle; Kirsten, Iris; Sillero-Zubiri, Claudio	National lion action plans and strategies in Benin, Cameroon and Senegal.	Cat News	2014	60		8	11	Senegal	Africa	13	-12.95	West Sudanian savanna	Tropical & Subtropical Grasslands, Savannas & Shrublands	Afrotropic	no
447	de Iongh, Hans H.; Croes, Barbara; Rasmussen, Greg; Buij, Ralph; Funston, Paul	The status of cheetah and African wild dog in the Benoue Ecosystem, North Cameroon.	Cat News	2011	55	1	29	31	Cameroon	Africa	8.22	13.88	Northern Congolian Forest-Savanna	Tropical & Subtropical Grasslands, Savannas & Shrublands	Afrotropic	no
447	de Iongh, Hans H.; Croes, Barbara; Rasmussen, Greg; Buij, Ralph; Funston, Paul	The status of cheetah and African wild dog in the Benoue Ecosystem, North Cameroon.	Cat News	2011	55	1	29	31	Cameroon	Africa	8.22	13.88	East Sudanian savanna	Tropical & Subtropical Grasslands, Savannas & Shrublands	Afrotropic
447	de Iongh, Hans H.; Croes, Barbara; Rasmussen, Greg; Buij, Ralph; Funston, Paul	The status of cheetah and African wild dog in the Benoue Ecosystem, North Cameroon.	Cat News	2011	55	1	29	31	Cameroon	Africa	8.22	13.88	Cameroon Highlands forests	Tropical & Subtropical Moist Broadleaf Forests	Afrotropic
448	de Kort, Dante; Altrichter, Mariana; Cortez, Sara; Camino, Micaela	Collared peccary (Pecari tajacu) behavioral reactions toward a dead member of the herd	ETHOLOGY	2018	124	2	131	134	USA	NA	34.57	-112.47	Arizona Mountains forests	Temperate Conifer Forests	Nearctic	no
449	de la Torre, J. Antonio; Medellin, Rodrigo A.	Jaguars Panthera onca in the Greater Lacandona Ecosystem, Chiapas, Mexico: population estimates and future prospects	ORYX	2011	45	4	546	553	Mexico	NA	16.17	-91	Petén-Veracruz moist forests	Tropical & Subtropical Moist Broadleaf Forests	Neotropic	no
450	De Lazari, Patrick Ricardo; dos Santos-Filho, Manoel; Canale, Gustavo Rodrigues; Graipel, Mauricio Eduardo	Flood-mediated use of habitat by large and midsized mammals in the Brazilian Pantanal	BIOTA NEOTROPICA	2013	13	2	70	75	Brazil	SA	16° 43’S	57° 44’W	Pantanal	Flooded Grasslands & Savannas	Neotropic	no
450	De Lazari, Patrick Ricardo; dos Santos-Filho, Manoel; Canale, Gustavo Rodrigues; Graipel, Mauricio Eduardo	Flood-mediated use of habitat by large and midsized mammals in the Brazilian Pantanal	BIOTA NEOTROPICA	2013	13	2	70	75	Brazil	SA	16° 50’S	57° 35’ W	Pantanal	Flooded Grasslands & Savannas	Neotropic	no
451	De Luca, Daniela W.; Rovero, Francesco	First records in Tanzania of the vulnerable Jackson's mongoose Bdeogale jacksoni (Herpestidae)	ORYX	2006	40	4	468	471	Tanzania	Africa	-7.77	36.62	Dry miombo woodlands	Tropical & Subtropical Grasslands, Savannas & Shrublands	Afrotropic	no
451	De Luca, Daniela W.; Rovero, Francesco	First records in Tanzania of the vulnerable Jackson's mongoose Bdeogale jacksoni (Herpestidae)	ORYX	2006	40	4	468	471	Tanzania	Africa	-7.77	36.62	Eastern Arc forests	Tropical & Subtropical Moist Broadleaf Forests	Afrotropic
452	De Luca, Daniela W.; Mpunga, Noah E.	Small carnivores of the Udzungwa Mountains: presence, distributions and threats.	Small Carnivore Conservation	2005	32		1	7	Tanzania	Africa	-7.77	36.62	Dry miombo woodlands	Tropical & Subtropical Grasslands, Savannas & Shrublands	Afrotropic	no
452	De Luca, Daniela W.; Mpunga, Noah E.	Small carnivores of the Udzungwa Mountains: presence, distributions and threats.	Small Carnivore Conservation	2005	32		1	7	Tanzania	Africa	-7.77	36.62	Eastern Arc forests	Tropical & Subtropical Moist Broadleaf Forests	Afrotropic
452	De Luca, Daniela W.; Mpunga, Noah E.	Small carnivores of the Udzungwa Mountains: presence, distributions and threats.	Small Carnivore Conservation	2005	32		1	7	Tanzania	Africa	-7.77	36.62	Southern Acacia-Commiphora bushlands and thickets	Tropical & Subtropical Grasslands, Savannas & Shrublands	Afrotropic
453	de Luca, Juliana Ranzani; Pardini, Renata	Use of early and late successional forest patches by the endangered Lowland tapir Tapirus terrestris (Perissodactyla: Tapiridae)	MAMMALIAN BIOLOGY	2017	86		107	114	Brazil	SA	-23.59	-45.87	Serra do Mar coastal forests	Tropical & Subtropical Moist Broadleaf Forests	Neotropic	no
454	de Oliveira, Marcio Leite; de Faria Peres, Pedro Henrique; Vogliotti, Alexandre; Grotta-Neto, Francisco; Koester de Azevedo, Allyson Diaz; Cerveira, Josi Fernanda; do Nascimento, Guilherme Batista; Peruzzi, Nelson Jose; Carranza, Juan; Barbanti Duarte, Jose Mauricio	Phylogenetic signal in the circadian rhythm of morphologically convergent species of Neotropical deer	MAMMALIAN BIOLOGY	2016	81	3	281	289	Brazil	SA	-25.48	-53.87	Alto Paraná Atlantic forests	Tropical & Subtropical Moist Broadleaf Forests	Neotropic	no
454	de Oliveira, Marcio Leite; de Faria Peres, Pedro Henrique; Vogliotti, Alexandre; Grotta-Neto, Francisco; Koester de Azevedo, Allyson Diaz; Cerveira, Josi Fernanda; do Nascimento, Guilherme Batista; Peruzzi, Nelson Jose; Carranza, Juan; Barbanti Duarte, Jose Mauricio	Phylogenetic signal in the circadian rhythm of morphologically convergent species of Neotropical deer	MAMMALIAN BIOLOGY	2016	81	3	281	289	Brazil	SA	-24.41	-48.31	Serra do Mar coastal forests	Tropical & Subtropical Moist Broadleaf Forests	Neotropic	no
454	de Oliveira, Marcio Leite; de Faria Peres, Pedro Henrique; Vogliotti, Alexandre; Grotta-Neto, Francisco; Koester de Azevedo, Allyson Diaz; Cerveira, Josi Fernanda; do Nascimento, Guilherme Batista; Peruzzi, Nelson Jose; Carranza, Juan; Barbanti Duarte, Jose Mauricio	Phylogenetic signal in the circadian rhythm of morphologically convergent species of Neotropical deer	MAMMALIAN BIOLOGY	2016	81	3	281	289	Brazil	SA	-9.36	-62.95	Madeira-Tapajós moist forests	Tropical & Subtropical Moist Broadleaf Forests	Neotropic	no
454	de Oliveira, Marcio Leite; de Faria Peres, Pedro Henrique; Vogliotti, Alexandre; Grotta-Neto, Francisco; Koester de Azevedo, Allyson Diaz; Cerveira, Josi Fernanda; do Nascimento, Guilherme Batista; Peruzzi, Nelson Jose; Carranza, Juan; Barbanti Duarte, Jose Mauricio	Phylogenetic signal in the circadian rhythm of morphologically convergent species of Neotropical deer	MAMMALIAN BIOLOGY	2016	81	3	281	289	Brazil	SA	-18.91	-56.8	Pantanal	Flooded Grasslands & Savannas	Neotropic	no
455	de Oliveira, Tadeu G.; Michalski, Fernanda; Botelho, Andre L. M.; Michalski, Lincoln J.; Calouro, Armando M.; Desbiez, Arnaud L. J.	How rare is rare? Quantifying and assessing the rarity of the bush dog Speothos venaticus across the Amazon and other biomes	ORYX	2018	52	1	98	107	Brazil	SA	-5.49	-57.71	Madeira-Tapajós moist forests	Tropical & Subtropical Moist Broadleaf Forests	Neotropic	no
455	de Oliveira, Tadeu G.; Michalski, Fernanda; Botelho, Andre L. M.; Michalski, Lincoln J.; Calouro, Armando M.; Desbiez, Arnaud L. J.	How rare is rare? Quantifying and assessing the rarity of the bush dog Speothos venaticus across the Amazon and other biomes	ORYX	2018	52	1	98	107	Brazil	SA	1.39	-51.82	Uatumã-Trombetas moist forests	Tropical & Subtropical Moist Broadleaf Forests	Neotropic	no
455	de Oliveira, Tadeu G.; Michalski, Fernanda; Botelho, Andre L. M.; Michalski, Lincoln J.; Calouro, Armando M.; Desbiez, Arnaud L. J.	How rare is rare? Quantifying and assessing the rarity of the bush dog Speothos venaticus across the Amazon and other biomes	ORYX	2018	52	1	98	107	Brazil	SA	-9.46	-56.06	Mato Grosso tropical dry forests	Tropical & Subtropical Moist Broadleaf Forests	Neotropic	no
455	de Oliveira, Tadeu G.; Michalski, Fernanda; Botelho, Andre L. M.; Michalski, Lincoln J.; Calouro, Armando M.; Desbiez, Arnaud L. J.	How rare is rare? Quantifying and assessing the rarity of the bush dog Speothos venaticus across the Amazon and other biomes	ORYX	2018	52	1	98	107	Brazil	SA	-8.26	-71.86	Southwest Amazon moist forests	Tropical & Subtropical Moist Broadleaf Forests	Neotropic	no
456	de Oliveira, Tadeu G.; Mazim, Fabio D.; Vieira, Odgley Q.; Barnett, Adrian P.A.; Silva, Gilberto do N.; Soares, Jose B.G.; Santos, Jean P.; da Silva, Victor F.; Araujo, Pedro A.; Tchaika, Ligia; Miranda, Cleuton L.	Nonvolant Mammal Megadiversity and Conservation Issues in a Threatened Central Amazonian Hotspot in Brazil.	Tropical Conservation Science	2016	9	4	16pp.	16pp.	Brazil	SA	4°20'80" S	51°12'00" W	Madeira-Tapajós moist forests	Tropical & Subtropical Moist Broadleaf Forests	Neotropic	no
459	de Pinho, Fernando Ferreira; Ferreira, Guilherme Braga; Paglia, Adriano Pereira	Influence of vegetation physiognomy, elevation and fire frequency on medium and large mammals in two protected areas of the Espinhaco Range	ZOOLOGIA	2017	34				Brazil	SA	-72.92	-43.75	Campos Rupestres montane savanna	Tropical & Subtropical Grasslands, Savannas & Shrublands	Neotropic	no
459	de Pinho, Fernando Ferreira; Ferreira, Guilherme Braga; Paglia, Adriano Pereira	Influence of vegetation physiognomy, elevation and fire frequency on medium and large mammals in two protected areas of the Espinhaco Range	ZOOLOGIA	2017	34				Brazil	SA	-72.92	-43.75	Bahia interior forests	Tropical & Subtropical Moist Broadleaf Forests	Neotropic
459	de Pinho, Fernando Ferreira; Ferreira, Guilherme Braga; Paglia, Adriano Pereira	Influence of vegetation physiognomy, elevation and fire frequency on medium and large mammals in two protected areas of the Espinhaco Range	ZOOLOGIA	2017	34				Brazil	SA	-18.17	-43.34	Cerrado	Tropical & Subtropical Grasslands, Savannas & Shrublands	Neotropic	no
460	de Satge, Jacques; Teichman, Kristine; Cristescu, Bogdan	Competition and coexistence in a small carnivore guild	OECOLOGIA	2017	184	4	873	884	South Africa	Africa	-30.11	17.75	Namaqualand-Richtersveld steppe	Deserts & Xeric Shrublands	Afrotropic	yes
460	de Satge, Jacques; Teichman, Kristine; Cristescu, Bogdan	Competition and coexistence in a small carnivore guild	OECOLOGIA	2017	184	4	873	884	South Africa	Africa	-30.11	17.75	Succulent Karoo xeric shrublands	Deserts & Xeric Shrublands	Afrotropic
461	de Souza, Julio Cesar; da Silva, Rosana Moreira; Rezende Goncalves, Marcos Paulo; Delgado Jardim, Rodrigo Jose; Markwith, Scott H.	Habitat use, ranching, and human-wildlife conflict within a fragmented landscape in the Pantanal, Brazil	BIOLOGICAL CONSERVATION	2018	217		349	357	Brazil	SA	-20.04	-56.79	Cerrado	Tropical & Subtropical Grasslands, Savannas & Shrublands	Neotropic	yes
462	Debata, Subrat; Swain, Kedar Kumar	Estimating mammalian diversity and relative abundance using camera traps in a tropical deciduous forest of kuldiha Wildlife Sanctuary, eastern India	MAMMAL STUDY	2018	43	1	45	53	India	Asia	21.63	86.63	East Deccan moist deciduous forests	Tropical & Subtropical Moist Broadleaf Forests	Indomalayan	no
463	Deere, Nicolas J.; Guillera-Arroita, Gurutzeta; Baking, Esther L.; Bernard, Henry; Pfeifer, Marion; Reynolds, Glen; Wearn, Oliver R.; Davies, Zoe G.; Struebig, Matthew J.	High Carbon Stock forests provide co-benefits for tropical biodiversity	JOURNAL OF APPLIED ECOLOGY	2018	55	2	997	1008	Borneo	Asia	4°46?N	116°57? E	Borneo montane rain forests	Tropical & Subtropical Moist Broadleaf Forests	Indomalayan	yes
463	Deere, Nicolas J.; Guillera-Arroita, Gurutzeta; Baking, Esther L.; Bernard, Henry; Pfeifer, Marion; Reynolds, Glen; Wearn, Oliver R.; Davies, Zoe G.; Struebig, Matthew J.	High Carbon Stock forests provide co-benefits for tropical biodiversity	JOURNAL OF APPLIED ECOLOGY	2018	55	2	997	1008	Borneo	Asia	4°46?N	116°57? E	Borneo lowland rain forests	Tropical & Subtropical Moist Broadleaf Forests	Indomalayan
464	DeGregorio, Brett A.; Sperry, Jinelle H.; Kovar, Daniel G.; Steen, David A.	Southern Flying Squirrels (Glaucomys volans) as Major Predators of Avian Nest Boxes in Conecuh National Forest, Alabama	SOUTHEASTERN NATURALIST	2019	18	3	476	488	USA	NA	31.12	-86.76	Southeast US conifer savannas	Temperate Grasslands, Savannas & Shrublands	Nearctic	no
465	Deka, Parag J.; Narayan, Goutam; Oliver, William L.R.; Fa, John E.	Reintroduced pygmy hogs (Porcula salvania) thrive a year after release - more hogs released in Sonai Rupai Wildlife Sanctuary, Assam, India.	Suiform Soundings	2009	9	1	23	28	India	Asia	26.87	92.41	Brahmaputra Valley semi-evergreen forests	Tropical & Subtropical Moist Broadleaf Forests	Indomalayan	no
466	Delgado-Martinez, Carlos M.; Alvarado, Fredy; Mendoza, Eduardo; Flores-Hernandez, Sandra; Navarrete, Audomaro; Navarrete, Eutimio; Botello, Francisco	An ignored role of sartenejas to mitigate water shortage hazards for tropical forest vertebrates	ECOLOGY	2018	99	3	758	760	Mexica	NA	18.44	-89.6	Yucatán moist forests	Tropical & Subtropical Moist Broadleaf Forests	Neotropic	no
466	Delgado-Martinez, Carlos M.; Alvarado, Fredy; Mendoza, Eduardo; Flores-Hernandez, Sandra; Navarrete, Audomaro; Navarrete, Eutimio; Botello, Francisco	An ignored role of sartenejas to mitigate water shortage hazards for tropical forest vertebrates	ECOLOGY	2018	99	3	758	760	Mexica	NA	18.44	-89.6	Petén-Veracruz moist forests	Tropical & Subtropical Moist Broadleaf Forests	Neotropic
467	Delgado-V, Carlos A.; Arias-Alzate, Andres; Botero, Sebastian; Sanchez-Londono, Juan D.	Behaviour of the Tayra Eira barbara near Medellin, Colombia: preliminary data from a video-capturing survey	Small Carnivore Conservation	2011	44		19	21	Colombia	SA	6°06?N	75°33?W	Magdalena Valley montane forests	Magdalena Valley montane forests	Neotropic	no
467	Delgado-V, Carlos A.; Arias-Alzate, Andres; Botero, Sebastian; Sanchez-Londono, Juan D.	Behaviour of the Tayra Eira barbara near Medellin, Colombia: preliminary data from a video-capturing survey	Small Carnivore Conservation	2011	44		19	21	Colombia	SA	6°06?N	75°33?W	Northern Andean páramo	Montane Grasslands & Shrublands	Neotropic
468	Delibes-Mateos, M.; Diaz-Ruiz, F.; Caro, J.; Ferreras, P.	Activity patterns of the vulnerable guina (Leopardus guigna) and its main prey in the Valdivian rainforest of southern Chile	MAMMALIAN BIOLOGY	2014	79	6	393	397	Chile	SA	42°22'S	72°24'W	Valdivian temperate forests	Temperate Broadleaf & Mixed Forests	Neotropic	no
470	Dennison, Catherine C.; Harveson, Patricia Moody; Harveson, Louis A.	ASSESSING HABITAT RELATIONSHIPS OF MOUNTAIN LIONS AND THEIR PREY IN THE DAVIS MOUNTAINS, TEXAS	SOUTHWESTERN NATURALIST	2016	61	1	18	27	USA	NA	30.65	-104.13	Sierra Madre Oriental pine-oak forests	Tropical & Subtropical Coniferous Forests	Nearctic	no
470	Dennison, Catherine C.; Harveson, Patricia Moody; Harveson, Louis A.	ASSESSING HABITAT RELATIONSHIPS OF MOUNTAIN LIONS AND THEIR PREY IN THE DAVIS MOUNTAINS, TEXAS	SOUTHWESTERN NATURALIST	2016	61	1	18	27	USA	NA	30.65	-104.13	Chihuahuan desert	Deserts & Xeric Shrublands	Nearctic
471	Dertien, Jeremy S.; Doherty, Paul F., Jr.; Bagley, Calvin F.; Haddix, John A.; Brinkman, Aleya R.; Neipert, Elizabeth S.	Evaluating Dall's Sheep Habitat Use via Camera Traps	JOURNAL OF WILDLIFE MANAGEMENT	2017	81	8	1457	1467	USA	NA	63.64	-146.28	Alaska-St. Elias Range tundra	Tundra	Nearctic	no
472	Despres-Einspenner, Marie-Lyne; Howe, Eric J.; Drapeau, Pierre; Kuehl, Hjalmar S.	An empirical evaluation of camera trapping and spatially explicit capture-recapture models for estimating chimpanzee density	AMERICAN JOURNAL OF PRIMATOLOGY	2017	79	7			Ivory Coast	Africa	5.67	-7.16	Western Guinean lowland forests	Tropical & Subtropical Moist Broadleaf Forests	Afrotropic	no
474	DeVault, TL; Douglas, MB; Castrale, JS; Mills, CE; Hayes, T; Rhodes, OE	Identification of nest predators at a Least Tern colony in southwestern Indiana	WATERBIRDS	2005	28	4	445	449	USA	NA	38.35	-87.76	Central US forest-grasslands transition	Temperate Grasslands, Savannas & Shrublands	Nearctic	no
475	Devens, Carolyn; Tshabalala, Thulani; McManus, Jeannine; Smuts, Bool	Counting the spots: The use of a spatially explicit capture-recapture technique and GPS data to estimate leopard (Panthera pardus) density in the Eastern and Western Cape, South Africa	AFRICAN JOURNAL OF ECOLOGY	2018	56	4	850	859	South Africa	Africa	-34.16	21.88	Knysna-Amatole montane forests	Tropical & Subtropical Moist Broadleaf Forests	Afrotropic	yes
475	Devens, Carolyn; Tshabalala, Thulani; McManus, Jeannine; Smuts, Bool	Counting the spots: The use of a spatially explicit capture-recapture technique and GPS data to estimate leopard (Panthera pardus) density in the Eastern and Western Cape, South Africa	AFRICAN JOURNAL OF ECOLOGY	2018	56	4	850	859	South Africa	Africa	-34.16	21.88	Fynbos shrubland	Mediterranean Forests, Woodlands & Scrub	Afrotropic
475	Devens, Carolyn; Tshabalala, Thulani; McManus, Jeannine; Smuts, Bool	Counting the spots: The use of a spatially explicit capture-recapture technique and GPS data to estimate leopard (Panthera pardus) density in the Eastern and Western Cape, South Africa	AFRICAN JOURNAL OF ECOLOGY	2018	56	4	850	859	South Africa	Africa	-34.16	21.88	Nama Karoo shrublands	Deserts & Xeric Shrublands	Afrotropic
475	Devens, Carolyn; Tshabalala, Thulani; McManus, Jeannine; Smuts, Bool	Counting the spots: The use of a spatially explicit capture-recapture technique and GPS data to estimate leopard (Panthera pardus) density in the Eastern and Western Cape, South Africa	AFRICAN JOURNAL OF ECOLOGY	2018	56	4	850	859	South Africa	Africa	-34.16	21.88	Renosterveld shrubland	Mediterranean Forests, Woodlands & Scrub	Afrotropic
475	Devens, Carolyn; Tshabalala, Thulani; McManus, Jeannine; Smuts, Bool	Counting the spots: The use of a spatially explicit capture-recapture technique and GPS data to estimate leopard (Panthera pardus) density in the Eastern and Western Cape, South Africa	AFRICAN JOURNAL OF ECOLOGY	2018	56	4	850	859	South Africa	Africa	-34.16	21.88	Succulent Karoo xeric shrublands	Deserts & Xeric Shrublands	Afrotropic
476	Dexter, C. E.; Appleby, R. G.; Edgar, J. P.; Scott, J.; Jones, D. N.	Using complementary remote detection methods for retrofitted eco-passages: a case study for monitoring individual koalas in south-east Queensland	WILDLIFE RESEARCH	2016	43	5	369	379	Australia	Australia	-27.53	152.97	Eastern Australian temperate forests	Temperate Broadleaf & Mixed Forests	Australasia	yes
477	Dhendup, Tashi; Shrestha, Bikram; Mahar, Neeraj; Kolipaka, Shekhar; Regmi, Ganga Ram; Jackson, Rodney	Distribution and status of the manul in the Himalayas and China.	Cat News	2019			31	36	China	Asia	35.65	95.34	Mongolian-Manchurian grassland	Temperate Grasslands, Savannas & Shrublands	Palearctic	no
	Dhendup, Tashi; Shrestha, Bikram; Mahar, Neeraj; Kolipaka, Shekhar; Regmi, Ganga Ram; Jackson, Rodney	Distribution and status of the manul in the Himalayas and China.	Cat News	2019			31	36	Nepal	Asia			Eastern Gobi desert steppe	Deserts & Xeric Shrublands	Palearctic
	Dhendup, Tashi; Shrestha, Bikram; Mahar, Neeraj; Kolipaka, Shekhar; Regmi, Ganga Ram; Jackson, Rodney	Distribution and status of the manul in the Himalayas and China.	Cat News	2019			31	36	Bhutan	Asia			Central China Loess Plateau mixed forests	Temperate Broadleaf & Mixed Forests	Palearctic
	Dhendup, Tashi; Shrestha, Bikram; Mahar, Neeraj; Kolipaka, Shekhar; Regmi, Ganga Ram; Jackson, Rodney	Distribution and status of the manul in the Himalayas and China.	Cat News	2019			31	36	India	Asia			Huang He Plain mixed forests	Temperate Broadleaf & Mixed Forests	Palearctic
	Dhendup, Tashi; Shrestha, Bikram; Mahar, Neeraj; Kolipaka, Shekhar; Regmi, Ganga Ram; Jackson, Rodney	Distribution and status of the manul in the Himalayas and China.	Cat News	2019			31	36	India	Asia			Ordos Plateau steppe	Montane Grasslands & Shrublands	Palearctic
	Dhendup, Tashi; Shrestha, Bikram; Mahar, Neeraj; Kolipaka, Shekhar; Regmi, Ganga Ram; Jackson, Rodney	Distribution and status of the manul in the Himalayas and China.	Cat News	2019			31	36	India	Asia			Helanshan montane conifer forests	Temperate Conifer Forests	Palearctic
	Dhendup, Tashi; Shrestha, Bikram; Mahar, Neeraj; Kolipaka, Shekhar; Regmi, Ganga Ram; Jackson, Rodney	Distribution and status of the manul in the Himalayas and China.	Cat News	2019			31	36	India	Asia			Southeast Tibet shrublands and meadows	Montane Grasslands & Shrublands	Palearctic
	Dhendup, Tashi; Shrestha, Bikram; Mahar, Neeraj; Kolipaka, Shekhar; Regmi, Ganga Ram; Jackson, Rodney	Distribution and status of the manul in the Himalayas and China.	Cat News	2019			31	36	India	Asia			Qionglai-Minshan conifer forests	Temperate Conifer Forests	Palearctic
	Dhendup, Tashi; Shrestha, Bikram; Mahar, Neeraj; Kolipaka, Shekhar; Regmi, Ganga Ram; Jackson, Rodney	Distribution and status of the manul in the Himalayas and China.	Cat News	2019			31	36	India	Asia			Tibetan Plateau alpine shrublands and meadows	Montane Grasslands & Shrublands	Palearctic
	Dhendup, Tashi; Shrestha, Bikram; Mahar, Neeraj; Kolipaka, Shekhar; Regmi, Ganga Ram; Jackson, Rodney	Distribution and status of the manul in the Himalayas and China.	Cat News	2019			31	36	India	Asia			Qilian Mountains conifer forests	Temperate Conifer Forests	Palearctic
	Dhendup, Tashi; Shrestha, Bikram; Mahar, Neeraj; Kolipaka, Shekhar; Regmi, Ganga Ram; Jackson, Rodney	Distribution and status of the manul in the Himalayas and China.	Cat News	2019			31	36	India	Asia			Central Tibetan Plateau alpine steppe	Montane Grasslands & Shrublands	Palearctic
	Dhendup, Tashi; Shrestha, Bikram; Mahar, Neeraj; Kolipaka, Shekhar; Regmi, Ganga Ram; Jackson, Rodney	Distribution and status of the manul in the Himalayas and China.	Cat News	2019			31	36	India	Asia			Alashan Plateau semi-desert	Deserts & Xeric Shrublands	Palearctic
	Dhendup, Tashi; Shrestha, Bikram; Mahar, Neeraj; Kolipaka, Shekhar; Regmi, Ganga Ram; Jackson, Rodney	Distribution and status of the manul in the Himalayas and China.	Cat News	2019			31	36	India	Asia			Qaidam Basin semi-desert	Deserts & Xeric Shrublands	Palearctic
	Dhendup, Tashi; Shrestha, Bikram; Mahar, Neeraj; Kolipaka, Shekhar; Regmi, Ganga Ram; Jackson, Rodney	Distribution and status of the manul in the Himalayas and China.	Cat News	2019			31	36	India	Asia			Taklimakan desert	Deserts & Xeric Shrublands	Palearctic
	Dhendup, Tashi; Shrestha, Bikram; Mahar, Neeraj; Kolipaka, Shekhar; Regmi, Ganga Ram; Jackson, Rodney	Distribution and status of the manul in the Himalayas and China.	Cat News	2019			31	36	India	Asia			North Tibetan Plateau-Kunlun Mountains alpine desert	Montane Grasslands & Shrublands	Palearctic
	Dhendup, Tashi; Shrestha, Bikram; Mahar, Neeraj; Kolipaka, Shekhar; Regmi, Ganga Ram; Jackson, Rodney	Distribution and status of the manul in the Himalayas and China.	Cat News	2019			31	36	India	Asia			Tarim Basin deciduous forests and steppe	Temperate Broadleaf & Mixed Forests	Palearctic
	Dhendup, Tashi; Shrestha, Bikram; Mahar, Neeraj; Kolipaka, Shekhar; Regmi, Ganga Ram; Jackson, Rodney	Distribution and status of the manul in the Himalayas and China.	Cat News	2019			31	36	India	Asia			Eastern Himalayan alpine shrub and meadows	Montane Grasslands & Shrublands	Palearctic
	Dhendup, Tashi; Shrestha, Bikram; Mahar, Neeraj; Kolipaka, Shekhar; Regmi, Ganga Ram; Jackson, Rodney	Distribution and status of the manul in the Himalayas and China.	Cat News	2019			31	36	India	Asia			Yarlung Zanbo arid steppe	Montane Grasslands & Shrublands	Palearctic
	Dhendup, Tashi; Shrestha, Bikram; Mahar, Neeraj; Kolipaka, Shekhar; Regmi, Ganga Ram; Jackson, Rodney	Distribution and status of the manul in the Himalayas and China.	Cat News	2019			31	36	India	Asia			Tian Shan montane steppe and meadows	Montane Grasslands & Shrublands	Palearctic
	Dhendup, Tashi; Shrestha, Bikram; Mahar, Neeraj; Kolipaka, Shekhar; Regmi, Ganga Ram; Jackson, Rodney	Distribution and status of the manul in the Himalayas and China.	Cat News	2019			31	36	India	Asia			Junggar Basin semi-desert	Deserts & Xeric Shrublands	Palearctic
	Dhendup, Tashi; Shrestha, Bikram; Mahar, Neeraj; Kolipaka, Shekhar; Regmi, Ganga Ram; Jackson, Rodney	Distribution and status of the manul in the Himalayas and China.	Cat News	2019			31	36	India	Asia			Altai montane forest and forest steppe	Temperate Conifer Forests	Palearctic
	Dhendup, Tashi; Shrestha, Bikram; Mahar, Neeraj; Kolipaka, Shekhar; Regmi, Ganga Ram; Jackson, Rodney	Distribution and status of the manul in the Himalayas and China.	Cat News	2019			31	36	India	Asia			Emin Valley steppe	Temperate Grasslands, Savannas & Shrublands	Palearctic
	Dhendup, Tashi; Shrestha, Bikram; Mahar, Neeraj; Kolipaka, Shekhar; Regmi, Ganga Ram; Jackson, Rodney	Distribution and status of the manul in the Himalayas and China.	Cat News	2019			31	36	India	Asia			Tian Shan montane conifer forests	Temperate Conifer Forests	Palearctic
	Dhendup, Tashi; Shrestha, Bikram; Mahar, Neeraj; Kolipaka, Shekhar; Regmi, Ganga Ram; Jackson, Rodney	Distribution and status of the manul in the Himalayas and China.	Cat News	2019			31	36	India	Asia			Tian Shan foothill arid steppe	Temperate Grasslands, Savannas & Shrublands	Palearctic
	Dhendup, Tashi; Shrestha, Bikram; Mahar, Neeraj; Kolipaka, Shekhar; Regmi, Ganga Ram; Jackson, Rodney	Distribution and status of the manul in the Himalayas and China.	Cat News	2019			31	36	India	Asia			Karakoram-West Tibetan Plateau alpine steppe	Montane Grasslands & Shrublands	Palearctic
	Dhendup, Tashi; Shrestha, Bikram; Mahar, Neeraj; Kolipaka, Shekhar; Regmi, Ganga Ram; Jackson, Rodney	Distribution and status of the manul in the Himalayas and China.	Cat News	2019			31	36	India	Asia			Pamir alpine desert and tundra	Montane Grasslands & Shrublands	Palearctic
	Dhendup, Tashi; Shrestha, Bikram; Mahar, Neeraj; Kolipaka, Shekhar; Regmi, Ganga Ram; Jackson, Rodney	Distribution and status of the manul in the Himalayas and China.	Cat News	2019			31	36	India	Asia			Western Himalayan alpine shrub and meadows	Montane Grasslands & Shrublands	Palearctic
	Dhendup, Tashi; Shrestha, Bikram; Mahar, Neeraj; Kolipaka, Shekhar; Regmi, Ganga Ram; Jackson, Rodney	Distribution and status of the manul in the Himalayas and China.	Cat News	2019			31	36	India	Asia			Rock Ice
	Dhendup, Tashi; Shrestha, Bikram; Mahar, Neeraj; Kolipaka, Shekhar; Regmi, Ganga Ram; Jackson, Rodney	Distribution and status of the manul in the Himalayas and China.	Cat News	2019			31	36	India	Asia			Eastern Himalayan broadleaf forests	Temperate Broadleaf & Mixed Forests	Indomalayan
	Dhendup, Tashi; Shrestha, Bikram; Mahar, Neeraj; Kolipaka, Shekhar; Regmi, Ganga Ram; Jackson, Rodney	Distribution and status of the manul in the Himalayas and China.	Cat News	2019			31	36	India	Asia			Western Himalayan broadleaf forests	Temperate Broadleaf & Mixed Forests	Indomalayan
478	Dhendup, Tashi; Thinley, Kinga; Tenzin, Ugyen	MAMMAL DIVERSITY IN A MONTANE FOREST IN CENTRAL BHUTAN	Journal of Threatened Taxa	2019	11	13	14757	14763	Bhutan	Asia	27.58	90.69	Eastern Himalayan subalpine conifer forests	Temperate Conifer Forests	Indomalayan	no
479	Dhendup, Tashi; Dorji, Rinzin	Camera-trap records of small carnivores from Gedu Territorial Forest Division, Bhutan	Small Carnivore Conservation	2018	56		36	41	Bhutan	Asia	27.04	89.5	Eastern Himalayan broadleaf forests	Temperate Broadleaf & Mixed Forests	Indomalayan	no
479	Dhendup, Tashi; Dorji, Rinzin	Camera-trap records of small carnivores from Gedu Territorial Forest Division, Bhutan	Small Carnivore Conservation	2018	56		36	41	Bhutan	Asia	27.04	89.5	Himalayan subtropical broadleaf forests	Tropical & Subtropical Moist Broadleaf Forests	Indomalayan
479	Dhendup, Tashi; Dorji, Rinzin	Camera-trap records of small carnivores from Gedu Territorial Forest Division, Bhutan	Small Carnivore Conservation	2018	56		36	41	Bhutan	Asia	27.04	89.5	Eastern Himalayan subalpine conifer forests	Temperate Conifer Forests	Indomalayan
480	Dhendup, Tashi	DISTRIBUTION AND CONSERVATION STATUS OF NEOFELIS NEBULOSA (FELIDAE) IN ROYAL MANAS NATIONAL PARK, BHUTAN	NATURE CONSERVATION RESEARCH	2018	3		97	102	Bhutan	Asia	26.97	90.78	Himalayan subtropical broadleaf forests	Tropical & Subtropical Moist Broadleaf Forests	Indomalayan	no
480	Dhendup, Tashi	DISTRIBUTION AND CONSERVATION STATUS OF NEOFELIS NEBULOSA (FELIDAE) IN ROYAL MANAS NATIONAL PARK, BHUTAN	NATURE CONSERVATION RESEARCH	2018	3		97	102	Bhutan	Asia	26.97	90.78	Brahmaputra Valley semi-evergreen forests	Tropical & Subtropical Moist Broadleaf Forests	Indomalayan
480	Dhendup, Tashi	DISTRIBUTION AND CONSERVATION STATUS OF NEOFELIS NEBULOSA (FELIDAE) IN ROYAL MANAS NATIONAL PARK, BHUTAN	NATURE CONSERVATION RESEARCH	2018	3		97	102	Bhutan	Asia	26.97	90.78	Himalayan subtropical pine forests	Tropical & Subtropical Coniferous Forests	Indomalayan
480	Dhendup, Tashi	DISTRIBUTION AND CONSERVATION STATUS OF NEOFELIS NEBULOSA (FELIDAE) IN ROYAL MANAS NATIONAL PARK, BHUTAN	NATURE CONSERVATION RESEARCH	2018	3		97	102	Bhutan	Asia	26.97	90.78	Eastern Himalayan broadleaf forests	Temperate Broadleaf & Mixed Forests	Indomalayan
481	Dhendup, Tashi; Tempa, Tshering; Norbu, Nawang	Camera trap records of Asiatic golden cat at high altitudes in Bhutan.	Cat News	2016	64		37	38	Bhutan	Asia	27°42’56.6” N	90°55’37.1” E	Eastern Himalayan alpine shrub and meadows	Montane Grasslands & Shrublands	Palearctic	no
481	Dhendup, Tashi; Tempa, Tshering; Norbu, Nawang	Camera trap records of Asiatic golden cat at high altitudes in Bhutan.	Cat News	2016	64		37	38	Bhutan	Asia	27°35’00.2”N	90°58’34.4” E	Eastern Himalayan subalpine conifer forests	Temperate Conifer Forests	Indomalayan
482	Di Bitetti, M. S.; Paviolo, A.; De Angelo, C.	Density, habitat use and activity patterns of ocelots (Leopardus pardalis) in the Atlantic Forest of Misiones, Argentina	JOURNAL OF ZOOLOGY	2006	270	1	153	163	Argentina	SA	25°58’S	54°06’W	Alto Paraná Atlantic forests	Tropical & Subtropical Moist Broadleaf Forests	Neotropic	no
482	Di Bitetti, M. S.; Paviolo, A.; De Angelo, C.	Density, habitat use and activity patterns of ocelots (Leopardus pardalis) in the Atlantic Forest of Misiones, Argentina	JOURNAL OF ZOOLOGY	2006	270	1	153	163	Argentina	SA	25°40’S	54°30’W	Alto Paraná Atlantic forests	Tropical & Subtropical Moist Broadleaf Forests	Neotropic
483	Di Bitetti, Mario S.; Paviolo, Agustin; De Angelo, Carlos	CAMERA TRAP PHOTOGRAPHIC RATES ON ROADS VS. OFF ROADS: LOCATION DOES MATTER	Mastozoologia Neotropical	2014	21	1	37	46	Argentina	SA	25°66’S	54°30’W	Alto Paraná Atlantic forests	Tropical & Subtropical Moist Broadleaf Forests	Neotropic	no
484	Di Bitetti, Mario S.; Albanesi, Sebastian A.; Jose Foguet, Maria; De Angelo, Carlos; Brown, Alejandro D.	The effect of anthropic pressures and elevation on the large and medium-sized terrestrial mammals of the subtropical mountain forests (Yungas) of NW Argentina	MAMMALIAN BIOLOGY	2013	78	1	21	27	Argentina	SA	22°09’51”S	63°54’40” W	Southern Andean Yungas	Tropical & Subtropical Moist Broadleaf Forests	Neotropic	yes
485	Di Bitetti, Mario S.; Albanesi, Sebastian; Foguet, Maria Jose; Cuyckens, Griet An Erica; Brown, Alejandro	The Yungas Biosphere Reserve of Argentina: a hot spot of South American wild cats.	Cat News	2011	54		25	29	Argentina	SA	-22.74	-64.74	Southern Andean Yungas	Tropical & Subtropical Moist Broadleaf Forests	Neotropic	no
485	Di Bitetti, Mario S.; Albanesi, Sebastian; Foguet, Maria Jose; Cuyckens, Griet An Erica; Brown, Alejandro	The Yungas Biosphere Reserve of Argentina: a hot spot of South American wild cats.	Cat News	2011	54		25	29	Argentina	SA	-22.74	-64.74	Central Andean puna	Montane Grasslands & Shrublands	Neotropic
485	Di Bitetti, Mario S.; Albanesi, Sebastian; Foguet, Maria Jose; Cuyckens, Griet An Erica; Brown, Alejandro	The Yungas Biosphere Reserve of Argentina: a hot spot of South American wild cats.	Cat News	2011	54		25	29	Argentina	SA	-22.74	-64.74	Central Andean dry puna	Montane Grasslands & Shrublands	Neotropic
486	Di Bitetti, Mario S.; De Angelo, Carlos D.; Di Blanco, Yamil E.; Paviolo, Agustin	Niche partitioning and species coexistence in a Neotropical felid assemblage	ACTA OECOLOGICA-INTERNATIONAL JOURNAL OF ECOLOGY	2010	36	4	403	412	Argentina	SA	-26.37	-54.18	Alto Paraná Atlantic forests	Tropical & Subtropical Moist Broadleaf Forests	Neotropic	no
486	Di Bitetti, Mario S.; De Angelo, Carlos D.; Di Blanco, Yamil E.; Paviolo, Agustin	Niche partitioning and species coexistence in a Neotropical felid assemblage	ACTA OECOLOGICA-INTERNATIONAL JOURNAL OF ECOLOGY	2010	36	4	403	412	Argentina	SA	-26.37	-54.18	Araucaria moist forests	Tropical & Subtropical Moist Broadleaf Forests	Neotropic
487	Di Bitetti, Mario S.; Di Blanco, Yamil E.; Pereira, Javier A.; Paviolo, Agustin; Jimenez Perez, Ignacio	TIME PARTITIONING FAVORS THE COEXISTENCE OF SYMPATRIC CRAB-EATING FOXES (CERDOCYON THOUS) AND PAMPAS FOXES (LYCALOPEX GYMNOCERCUS)	JOURNAL OF MAMMALOGY	2009	90	2	479	490	Argentina	SA	25°30’S–27°00’S	53°50’W–54°30’W	Alto Paraná Atlantic forests	Tropical & Subtropical Moist Broadleaf Forests	Neotropic	no
487	Di Bitetti, Mario S.; Di Blanco, Yamil E.; Pereira, Javier A.; Paviolo, Agustin; Jimenez Perez, Ignacio	TIME PARTITIONING FAVORS THE COEXISTENCE OF SYMPATRIC CRAB-EATING FOXES (CERDOCYON THOUS) AND PAMPAS FOXES (LYCALOPEX GYMNOCERCUS)	JOURNAL OF MAMMALOGY	2009	90	2	479	490	Brazil	SA	25°30’S–27°00’S	53°50’W–54°30’W	Araucaria moist forests	Tropical & Subtropical Moist Broadleaf Forests	Neotropic
487	Di Bitetti, Mario S.; Di Blanco, Yamil E.; Pereira, Javier A.; Paviolo, Agustin; Jimenez Perez, Ignacio	TIME PARTITIONING FAVORS THE COEXISTENCE OF SYMPATRIC CRAB-EATING FOXES (CERDOCYON THOUS) AND PAMPAS FOXES (LYCALOPEX GYMNOCERCUS)	JOURNAL OF MAMMALOGY	2009	90	2	479	490	Brazil	SA	28°39’S	57°23’W	Southern Cone Mesopotamian savanna	Flooded Grasslands & Savannas	Neotropic
487	Di Bitetti, Mario S.; Di Blanco, Yamil E.; Pereira, Javier A.; Paviolo, Agustin; Jimenez Perez, Ignacio	TIME PARTITIONING FAVORS THE COEXISTENCE OF SYMPATRIC CRAB-EATING FOXES (CERDOCYON THOUS) AND PAMPAS FOXES (LYCALOPEX GYMNOCERCUS)	JOURNAL OF MAMMALOGY	2009	90	2	479	490	Brazil	SA	37°57’S	65°33’W	Low Monte	Temperate Grasslands, Savannas & Shrublands	Neotropic
488	Di Bitetti, Mario S.; Paviolo, Agustin; Ferrari, Carolina A.; De Angelo, Carlos; Di Blanco, Yamil	Differential responses to hunting in two sympatric species of brocket deer (Mazama americana and M-Nana)	BIOTROPICA	2008	40	5	636	645	Argentina	SA	25°58’S	54°06’W	Alto Paraná Atlantic forests	Tropical & Subtropical Moist Broadleaf Forests	Neotropic	no
488	Di Bitetti, Mario S.; Paviolo, Agustin; Ferrari, Carolina A.; De Angelo, Carlos; Di Blanco, Yamil	Differential responses to hunting in two sympatric species of brocket deer (Mazama americana and M-Nana)	BIOTROPICA	2008	40	5	636	645	Argentina	SA	25°40’S	54°20’W	Alto Paraná Atlantic forests	Tropical & Subtropical Moist Broadleaf Forests	Neotropic
488	Di Bitetti, Mario S.; Paviolo, Agustin; Ferrari, Carolina A.; De Angelo, Carlos; Di Blanco, Yamil	Differential responses to hunting in two sympatric species of brocket deer (Mazama americana and M-Nana)	BIOTROPICA	2008	40	5	636	645	Argentina	SA	26°58’S	54°00’W	Alto Paraná Atlantic forests	Tropical & Subtropical Moist Broadleaf Forests	Neotropic
489	Di Bitetti, Mario S.; Paviolo, Agustin; De Angelo, Carlos D.; Di Blanco, Yamil E.	Local and continental correlates of the abundance of a neotropical cat, the ocelot (Leopardus pardalis)	JOURNAL OF TROPICAL ECOLOGY	2008	24		189	200	Argentina	SA	-25.61	-54.24	Alto Paraná Atlantic forests	Tropical & Subtropical Moist Broadleaf Forests	Neotropic	no
489	Di Bitetti, Mario S.; Paviolo, Agustin; De Angelo, Carlos D.; Di Blanco, Yamil E.	Local and continental correlates of the abundance of a neotropical cat, the ocelot (Leopardus pardalis)	JOURNAL OF TROPICAL ECOLOGY	2008	24		189	200	Argentina	SA	-26.9	-54	Alto Paraná Atlantic forests	Tropical & Subtropical Moist Broadleaf Forests	Neotropic
490	Di Blanco, Yamil E.; Sporring, Karina L.; Di Bitetti, Mario S.	Daily activity pattern of reintroduced giant anteaters (Myrmecophaga tridactyla): effects of seasonality and experience	MAMMALIA	2017	81	1	11	21	Argentina	SA	28°39' S	57°23' W	Southern Cone Mesopotamian savanna	Flooded Grasslands & Savannas	Neotropic	no
491	Di Vittorio, M.; Lo Valvo, M.; Di Trapani, E.; Sanguinetti, A.; Ciaccio, A.; Grenci, S.; Zafarana, M.; Giacalone, G.; Patti, N.; Cacopardi, S.; Rannisi, P.; Scuderi, A.; Luiselli, L.; La Grua, G.; Cortone, G.; Merlino, S.; Falci, A.; Spinella, G.; Lopez-Lopez, P.	Long-term changes in the breeding period diet of Bonelli's eagle (Aquila fasciata) in Sicily, Italy	WILDLIFE RESEARCH	2019	46	5	409	414	Italy	Europe	37.63	14.15	Tyrrhenian-Adriatic sclerophyllous and mixed forests	Mediterranean Forests, Woodlands & Scrub	Palearctic	no
491	Di Vittorio, M.; Lo Valvo, M.; Di Trapani, E.; Sanguinetti, A.; Ciaccio, A.; Grenci, S.; Zafarana, M.; Giacalone, G.; Patti, N.; Cacopardi, S.; Rannisi, P.; Scuderi, A.; Luiselli, L.; La Grua, G.; Cortone, G.; Merlino, S.; Falci, A.; Spinella, G.; Lopez-Lopez, P.	Long-term changes in the breeding period diet of Bonelli's eagle (Aquila fasciata) in Sicily, Italy	WILDLIFE RESEARCH	2019	46	5	409	414	Italy	Europe	37.63	14.15	South Apennine mixed montane forests	Mediterranean Forests, Woodlands & Scrub	Palearctic
492	Dias, Douglas de Matos; Massara, Rodrigo Lima; de Campos, Claudia Bueno; Guimaraes Rodrigues, Flavio Henrique	Human activities influence the occupancy probability of mammalian carnivores in the Brazilian Caatinga	BIOTROPICA	2019	51	2	253	265	Brazil	SA	-9.99	-40.93	Caatinga	Tropical & Subtropical Dry Broadleaf Forests	Neotropic	no
493	Dias, Douglas de Matos; Miranda, Flavia Regina; Guimaraes Rodrigues, Flavio Henrique	New record of giant anteater Myrmecophaga tridactyla (Pilosa, Myrmecophagidae) in Northeast Brazil	Neotropical Biology and Conservation	2019	14	1	129	135	Brazil	SA	9°55'47.29"S	41°3'29.83"W	Caatinga	Tropical & Subtropical Dry Broadleaf Forests	Neotropic	no
494	Dias, Douglas de Matos	Spatiotemporal ecology of the striped hog-nosed skunk Conepatus semistriatus (Carnivora, Mephitidae) in a seasonally dry forest of northeastern Brazil	ANIMAL BIOLOGY	2017	67	2	119	131	Brazil	SA	5°8'29.15"S	40°54'58.60"W	Caatinga	Tropical & Subtropical Dry Broadleaf Forests	Neotropic	no
495	Diaz-Ruiz, F.; Caro, J.; Delibes-Mateos, M.; Arroyo, B.; Ferreras, P.	Drivers of red fox (Vulpes vulpes) daily activity: prey availability, human disturbance or habitat structure?	JOURNAL OF ZOOLOGY	2016	298	2	128	138	Spain	Europe	38.78	-3.84	Iberian sclerophyllous and semi-deciduous forests	Mediterranean Forests, Woodlands & Scrub	Palearctic	yes
495	Diaz-Ruiz, F.; Caro, J.; Delibes-Mateos, M.; Arroyo, B.; Ferreras, P.	Drivers of red fox (Vulpes vulpes) daily activity: prey availability, human disturbance or habitat structure?	JOURNAL OF ZOOLOGY	2016	298	2	128	138	Spain	Europe	38.78	-3.84	Iberian conifer forests	Mediterranean Forests, Woodlands & Scrub	Palearctic
496	Diaz-Ruiz, Francisco; de Diego, Noelia; Eugenia Santamaria, Ana; Dominguez, Julio C.; Galgo, Alex; Garcia, Jesus T.; Olea, Pedro P.; Vinuela, Javier	Direct evidence of scavenging behaviour in the garden dormouse (Eliomys quercinus)	MAMMALIA	2018	82	5	486	489	Spain	Europe	42°59.9?N	4°54.1?W	Cantabrian mixed forests	Temperate Broadleaf & Mixed Forests	Palearctic	yes
497	Diete, Rebecca L.; Meek, Paul D.; Dickman, Christopher R.; Lisle, Allan; Leung, Luke K. -P.	Diel activity patterns of northern Australian small mammals: variation, fixity, and plasticity	JOURNAL OF MAMMALOGY	2017	98	3	848	857	Australia	Australia	-14.01	136.59	Arnhem Land tropical savanna	Tropical & Subtropical Grasslands, Savannas & Shrublands	Australasia	no
498	Diete, Rebecca L.; Meek, Paul D.; Dixon, Kelly M.; Dickman, Christopher R.; Leung, Luke K. -P.	Best bait for your buck: bait preference for camera trapping north Australian mammals	AUSTRALIAN JOURNAL OF ZOOLOGY	2015	63	6	376	382	Australia	Australia	13.9838°–13.9708°S	136.4825°E–36.5022°E	Arnhem Land tropical savanna	Tropical & Subtropical Grasslands, Savannas & Shrublands	Australasia	no
499	Diggins, Corinne A.; Gilley, L. Michelle; Kelly, Christine A.; Ford, W. Mark	Comparison of Survey Techniques on Detection of Northern Flying Squirrels	WILDLIFE SOCIETY BULLETIN	2016	40	4	654	662	USA	NA	36°5.65?N	82°8.49?W	Appalachian-Blue Ridge forests	Temperate Broadleaf & Mixed Forests	Nearctic	no
500	Dillon, Adam; Kelly, Marcella J.	Ocelot Leopardus pardalis in Belize: the impact of trap spacing and distance moved on density estimates	ORYX	2007	41	4	469	477	Belize	SA	16.73	-88.99	Petén-Veracruz moist forests	Tropical & Subtropical Moist Broadleaf Forests	Neotropic	no
500	Dillon, Adam; Kelly, Marcella J.	Ocelot Leopardus pardalis in Belize: the impact of trap spacing and distance moved on density estimates	ORYX	2007	41	4	469	477	Belize	SA	16.73	-88.99	Belizian pine savannas	Tropical & Subtropical Grasslands, Savannas & Shrublands	Neotropic
501	Dinata, Yoan; Nugroho, Agung; Haidir, Iding Achmad; Linkie, Matthew	Camera trapping rare and threatened avifauna in west-central Sumatra	BIRD CONSERVATION INTERNATIONAL	2008	18	1	30	37	Indonesia	Asia	-0.08	100.48	Sumatran montane rain forests	Tropical & Subtropical Moist Broadleaf Forests	Indomalayan	no
501	Dinata, Yoan; Nugroho, Agung; Haidir, Iding Achmad; Linkie, Matthew	Camera trapping rare and threatened avifauna in west-central Sumatra	BIRD CONSERVATION INTERNATIONAL	2008	18	1	30	37	Indonesia	Asia	-0.08	100.48	Sumatran lowland rain forests	Tropical & Subtropical Moist Broadleaf Forests	Indomalayan
503	Divoll, Timothy J.; Kumar, Anjali; Flores-Negron, Cesar F.; Hurtado, Cindy M.	MATERNITY ROOST OF Eptesicus brasiliensis IN A LIANA IN THE SOUTHEAST PERUVIAN AMAZON	Mastozoologia Neotropical	2015	22	1	155	161	Peru	SA	11°53’S	71°26’W	Southwest Amazon moist forests	Tropical & Subtropical Moist Broadleaf Forests	Neotropic	no
505	Dixon, Victoria; Glover, Hayley K.; Winnell, Jodie; Treloar, Shannon M.; Whisson, Desley A.; Weston, Michael A.	Evaluation of three remote camera systems for detecting mammals and birds	Ecological Management & Restoration	2009	10	2	156	157	Australia	Australia	-38.77	143.54	Eastern Australian temperate forests	Temperate Broadleaf & Mixed Forests	Australasia	no
507	Dobbins, Michael T.; Steinberg, Michael K.; Broadbent, Eben N.; Ryan, Sadie J.	Habitat use, activity patterns and human interactions with jaguars &ITPanthera onca&IT in southern Belize	ORYX	2018	52	2	276	281	Belize	SA	16.2	-89.04	Petén-Veracruz moist forests	Tropical & Subtropical Moist Broadleaf Forests	Neotropic	yes
509	Dodino, Samanta; Hart, Tom; Harris, Sabrina; Rey, Andrea Raya	Year-round colony attendance patterns for the Gentoo Penguin (Pygoscelis papua) at Martillo Island, Tierra del Fuego, Argentina	WILSON JOURNAL OF ORNITHOLOGY	2018	130	2	493	501	Argentina	SA	54°54.5’S	67°23’W	Magellanic subpolar forests	Temperate Broadleaf & Mixed Forests	Neotropic	no
510	Dominguez, Lillian; Miranda, Roberto J.; Torres, Sugeys; Moreno, Ricardo; Ortega, Josue; Bermudez, Sergio E.	Hard tick (Acari: Ixodidae) survey of Oleoducto trail, Soberania National Park, Panama	TICKS AND TICK-BORNE DISEASES	2019	10	4	830	837	Panama	SA	9.13	-79.71	Isthmian-Atlantic moist forests	Tropical & Subtropical Moist Broadleaf Forests	Neotropic	no
511	Doody, J. Sean; McHenry, Colin R.; Rhind, David; Clulow, Simon	Novel habitat causes a shift to diurnal activity in a nocturnal species	SCIENTIFIC REPORTS	2019	9				Australia	Australia	15°53?42.12??S	128°7?56.84??E	Kimberly tropical savanna	Tropical & Subtropical Grasslands, Savannas & Shrublands	Australasia	no
512	Doody, J. Sean; Pauza, Matthew; Stewart, Bret; Camacho, Chris	Nesting Behavior of the Pig-Nosed Turtle, Carettochelys insculpta, in Australia	CHELONIAN CONSERVATION AND BIOLOGY	2009	8	2	185	191	Australia	Australia	14°04?40"S	131°15?00"E	Kimberly tropical savanna	Tropical & Subtropical Grasslands, Savannas & Shrublands	Australasia	no
513	Dorazio, Robert M.; Karanth, K. Ullas	A hierarchical model for estimating the spatial distribution and abundance of animals detected by continuous-time recorders	PLOS ONE	2017	12	5			India	Asia	12	76.16	South Western Ghats moist deciduous forests	Tropical & Subtropical Moist Broadleaf Forests	Indomalayan	no
514	Dorazio, Robert M.	Bayes and Empirical Bayes Estimators of Abundance and Density from Spatial Capture-Recapture Data	PLOS ONE	2013	8	12			India	Asia	12	76.16	South Western Ghats moist deciduous forests	Tropical & Subtropical Moist Broadleaf Forests	Indomalayan	no
515	Dorji, Sangay; Rajaratnam, Rajanathan; Vernes, Karl	Mammal richness and diversity in a Himalayan hotspot: the role of protected areas in conserving Bhutan's mammals	BIODIVERSITY AND CONSERVATION	2019	28	12	3277	3297	Bhutan	Asia	27.23	90.38	Eastern Himalayan broadleaf forests	Temperate Broadleaf & Mixed Forests	Indomalayan	no
515	Dorji, Sangay; Rajaratnam, Rajanathan; Vernes, Karl	Mammal richness and diversity in a Himalayan hotspot: the role of protected areas in conserving Bhutan's mammals	BIODIVERSITY AND CONSERVATION	2019	28	12	3277	3297	Bhutan	Asia	27.23	90.38	Himalayan subtropical broadleaf forests	Tropical & Subtropical Moist Broadleaf Forests	Indomalayan
515	Dorji, Sangay; Rajaratnam, Rajanathan; Vernes, Karl	Mammal richness and diversity in a Himalayan hotspot: the role of protected areas in conserving Bhutan's mammals	BIODIVERSITY AND CONSERVATION	2019	28	12	3277	3297	Bhutan	Asia	27.23	90.38	Himalayan subtropical pine forests	Tropical & Subtropical Coniferous Forests	Indomalayan
515	Dorji, Sangay; Rajaratnam, Rajanathan; Vernes, Karl	Mammal richness and diversity in a Himalayan hotspot: the role of protected areas in conserving Bhutan's mammals	BIODIVERSITY AND CONSERVATION	2019	28	12	3277	3297	Bhutan	Asia	27.23	90.38	Eastern Himalayan subalpine conifer forests	Temperate Conifer Forests	Indomalayan
515	Dorji, Sangay; Rajaratnam, Rajanathan; Vernes, Karl	Mammal richness and diversity in a Himalayan hotspot: the role of protected areas in conserving Bhutan's mammals	BIODIVERSITY AND CONSERVATION	2019	28	12	3277	3297	Bhutan	Asia	27.23	90.38	Eastern Himalayan alpine shrub and meadows	Montane Grasslands & Shrublands	Indomalayan
516	Dorning, Jo; Harris, Stephen	Individual and seasonal variation in contact rate, connectivity and centrality in red fox (Vulpes vulpes) social groups	SCIENTIFIC REPORTS	2019	9				UK	Europe	51.46	-2.55	English Lowlands beech forests	Temperate Broadleaf & Mixed Forests	Palearctic	yes
517	Dorning, Jo; Harris, Stephen	Understanding the intricacy of canid social systems: Structure and temporal stability of red fox (Vulpes vulpes) groups	PLOS ONE	2019	14	9			UK	Europe	51.46	-2.55	English Lowlands beech forests	Temperate Broadleaf & Mixed Forests	Palearctic	yes
518	Dorning, Jo; Harris, Stephen	The challenges of recognising individuals with few distinguishing features: Identifying red foxes Vulpes vulpes from camera-trap photos	PLOS ONE	2019	14	5			UK	Europe	51.46	-2.55	English Lowlands beech forests	Temperate Broadleaf & Mixed Forests	Palearctic	yes
519	Driessen, Michael M.; Jarman, Peter J.; Troy, Shannon; Callander, Sophia	Animal detections vary among commonly used camera trap models	WILDLIFE RESEARCH	2017	44	4	291	297	Australia	Australia	42°54.5’S	147°14.9’E	Tasmanian temperate forests	Temperate Broadleaf & Mixed Forests	Australasia	no
519	Driessen, Michael M.; Jarman, Peter J.; Troy, Shannon; Callander, Sophia	Animal detections vary among commonly used camera trap models	WILDLIFE RESEARCH	2017	44	4	291	297	Australia	Australia	42°56.1’S	147°18.9’E
520	Droghini, Amanda; Boutin, Stan	The calm during the storm: Snowfall events decrease the movement rates of grey wolves (Canis lupus)	PLOS ONE	2018	13	10			Canada	NA	56.4?N	111.1?W	Mid-Canada Boreal Plains forests	Boreal Forests/Taiga	Nearctic	no
521	Drouilly, Marine; O'Riain, M. Justin	Wildlife winners and losers of extensive small-livestock farming: a case study in the South African Karoo	BIODIVERSITY AND CONSERVATION	2019	28	6	1493	1511	South Africa	Africa	33°15?S	21°00?E	Succulent Karoo xeric shrublands	Deserts & Xeric Shrublands	Afrotropic	yes
521	Drouilly, Marine; O'Riain, M. Justin	Wildlife winners and losers of extensive small-livestock farming: a case study in the South African Karoo	BIODIVERSITY AND CONSERVATION	2019	28	6	1493	1511	South Africa	Africa	33°31?S	20°37?E	Fynbos shrubland	Mediterranean Forests, Woodlands & Scrub	Afrotropic	no
522	Drouilly, Marine; Clark, Allan; O'Riain, M. Justin	Multi-species occupancy modelling of mammal and ground bird communities in rangeland in the Karoo: A case for dryland systems globally	BIOLOGICAL CONSERVATION	2018	224		16	25	South Africa	Africa	-33.25	21	Succulent Karoo xeric shrublands	Deserts & Xeric Shrublands	Afrotropic	yes
522	Drouilly, Marine; Clark, Allan; O'Riain, M. Justin	Multi-species occupancy modelling of mammal and ground bird communities in rangeland in the Karoo: A case for dryland systems globally	BIOLOGICAL CONSERVATION	2018	224		16	25	South Africa	Africa	-33.52	20.62	Fynbos shrubland	Mediterranean Forests, Woodlands & Scrub	Afrotropic	no
523	Drury, Robin	A community-based biodiversity survey in the parks and reserves of eastern and south-eastern Melbourne-results and perspective Fauna Survey Group Contribution No. 29	Victorian Naturalist (Blackburn)	2017	134	5	132	149	Australia	Australia	-37.95	145.28	Eastern Australian temperate forests	Temperate Broadleaf & Mixed Forests	Australasia	no
523	Drury, Robin	A community-based biodiversity survey in the parks and reserves of eastern and south-eastern Melbourne-results and perspective Fauna Survey Group Contribution No. 30	Victorian Naturalist (Blackburn)	2017	134	5	132	149	Australia	Australia	-37.95	145.28	Southeast Australia temperate forests	Temperate Broadleaf & Mixed Forests	Australasia
524	Drury, Robin	The use of remote cameras at the nestboxes of arboreal mammals, Brush-tailed Phascogale Phascogale tapoatafa and Sugar Glider Petaurus breviceps in the Rushworth State Forest	Victorian Naturalist (Blackburn)	2014	131	1	15	23	Australia	Australia	-36.63	145.06	Southeast Australia temperate forests	Temperate Broadleaf & Mixed Forests	Australasia	no
527	Dubruiel, Amy; Woodford, James E.; MacFarland, David M.	Documentation of Infanticide in American Marten (Martes americana)	Canadian Field-Naturalist	2013	127	2	178	179	USA	NA	46°17'N	90°55'W	Western Great Lakes forests	Temperate Broadleaf & Mixed Forests	Nearctic	no
528	Duckworth, J.W.; Lynam, Antony J.; Breitenmoser-Wuersten, Christine	Non-Panthera cats in Southeast Asia: present knowledge and recommendations.	Cat News	2014			62	67
532	Dundas, Shannon J.; Ruthrof, Katinka X.; Hardy, Giles E. St. J.; Fleming, Patricia A.	Pits or pictures: a comparative study of camera traps and pitfall trapping to survey small mammals and reptiles	WILDLIFE RESEARCH	2019	46	2	104	113	Australia	Australia	-32.28	116.32	Southwest Australia woodlands	Mediterranean Forests, Woodlands & Scrub	Australasia	no
534	Dundas, Shannon J.; Adams, Peter J.; Fleming, Patricia A.	First in, first served: uptake of 1080 poison fox baits in south-west Western Australia	WILDLIFE RESEARCH	2014	41	2	117	126	Australia	Australia	-32.28	116.32	Southwest Australia woodlands	Mediterranean Forests, Woodlands & Scrub	Australasia	no
535	Dunne, Bridget M.; Quinn, Michael S.	Effectiveness of above-ground pipeline mitigation for moose (Alces alces) and other large mammals	BIOLOGICAL CONSERVATION	2009	142	2	332	343	Canada	NA	56.26	-117.2	Mid-Canada Boreal Plains forests	Boreal Forests/Taiga	Nearctic	no
536	Dupuis-Desormeaux, Marc; Davidson, Zeke; Mwololo, Mary; Kisio, Edwin; MacDonald, Suzanne E.	Comparing motion capture cameras versus human observer monitoring of mammal movement through fence gaps: a case study from Kenya	AFRICAN JOURNAL OF ECOLOGY	2016	54	2	154	161	Kenya	Africa	0.24	37.44	Northern Acacia-Commiphora bushlands and thickets	Tropical & Subtropical Grasslands, Savannas & Shrublands	Afrotropic	no
537	Duque Lopez, Sebastian; Abud, Melissa; Calero Mejia, Humberto; Valderrama, Stephany	Camera-trap Records of Mountain Tapir in Purace National Park, Colombia.	Tapir Conservation	2013	22	31	5	8	Colombia	SA	1°54’52”N	76°37’30.90”W	Eastern Cordillera Real montane forests	Tropical & Subtropical Moist Broadleaf Forests	Neotropic	no
537	Duque Lopez, Sebastian; Abud, Melissa; Calero Mejia, Humberto; Valderrama, Stephany	Camera-trap Records of Mountain Tapir in Purace National Park, Colombia.	Tapir Conservation	2013	22	31	5	8	Colombia	SA	1°54’52”N	76°37’30.90”W	Northern Andean páramo	Montane Grasslands & Shrublands	Neotropic
538	Duquette, Jared F.; Urena, Luis; Ortega, Josue; Cisneros, Iliana; Moreno, Ricardo; Flores, Eric E.	Coiban agouti (Dasyprocta coibae) density and temporal activity on Coiba Island, Veraguas, Panama	MAMMAL STUDY	2017	42	3	153	160	Panama	SA	7.44	-81.77	Isthmian-Pacific moist forests	Tropical & Subtropical Moist Broadleaf Forests	Neotropic	no
538	Duquette, Jared F.; Urena, Luis; Ortega, Josue; Cisneros, Iliana; Moreno, Ricardo; Flores, Eric E.	Coiban agouti (Dasyprocta coibae) density and temporal activity on Coiba Island, Veraguas, Panama	MAMMAL STUDY	2017	42	3	153	160	Panama	SA	7.44	-81.77	Southern Mesoamerican Pacific mangroves	Mangroves	Neotropic
539	Duquette, Jared F.; Belant, Jerrold L.; Svoboda, Nathan J.; Beyer, Dean E., Jr.; Albright, Craig A.	Comparison of occupancy modeling and radiotelemetry to estimate ungulate population dynamics	POPULATION ECOLOGY	2014	56	3	481	492	USA	NA	45°43'47"N	87°4'48"W	Western Great Lakes forests	Temperate Broadleaf & Mixed Forests	Nearctic	no
541	Duran, E.; Figel, J. J.; Bray, D. B.	Uncertain coexistence: jaguars and communities in montane forests of Mexico.	Unasylva (English ed.)	2010	61	234/235	21	22	Mexico	NA	17.28	-95.97	Petén-Veracruz moist forests	Tropical & Subtropical Moist Broadleaf Forests	Neotropic	no
541	Duran, E.; Figel, J. J.; Bray, D. B.	Uncertain coexistence: jaguars and communities in montane forests of Mexico.	Unasylva (English ed.)	2010	61	234/236	21	22	Mexico	NA	17.28	-95.97	Sierra Madre de Oaxaca pine-oak forests	Tropical & Subtropical Coniferous Forests	Neotropic
541	Duran, E.; Figel, J. J.; Bray, D. B.	Uncertain coexistence: jaguars and communities in montane forests of Mexico.	Unasylva (English ed.)	2010	61	234/237	21	22	Mexico	NA	17.28	-95.97	Oaxacan montane forests	Tropical & Subtropical Moist Broadleaf Forests	Neotropic
541	Duran, E.; Figel, J. J.; Bray, D. B.	Uncertain coexistence: jaguars and communities in montane forests of Mexico.	Unasylva (English ed.)	2010	61	234/238	21	22	Mexico	NA	17.28	-95.97	Southern Pacific dry forests	Tropical & Subtropical Dry Broadleaf Forests	Neotropic
543	Eakin, Carly J.; Hunter, Malcolm L.; Calhoun, Aram J. K.	Bird and mammal use of vernal pools along an urban development gradient	URBAN ECOSYSTEMS	2018	21	6	1029	1041	USA	NA	44° 48? 8^ N	68° 46? 13^ W	New England-Acadian forests	Temperate Broadleaf & Mixed Forests	Nearctic	yes
544	Easter, Tara; Bouley, Paola; Carter, Neil	Opportunities for biodiversity conservation outside of Gorongosa National Park, Mozambique: A multispecies approach	BIOLOGICAL CONSERVATION	2019	232		217	227	Mozambique	Africa	-18.9	34.84	Southern Swahili coastal forests and woodlands	Tropical & Subtropical Moist Broadleaf Forests	Afrotropic	no
545	Eaton, Donald P.; Keuroghlian, Alexine; Santos, Maria do Carmo A.; Desbiez, Arnaud L. J.; Sada, Donald W.	Citizen scientists help unravel the nature of cattle impacts on native mammals and birds visiting fruiting trees in Brazil's southern Pantanal	BIOLOGICAL CONSERVATION	2017	208		29	39	Brazil	SA	-19.4667	-55.5333	Pantanal	Flooded Grasslands & Savannas	Neotropic	no
546	Ebner, Brendan C.; Donaldson, James A.; Allen, Gerald R.; Keith, Philippe	Visual census, photographic records and the trial of a video network provide first evidence of the elusive Sicyopterus cynocephalus in Australia	CYBIUM	2017	41	2	117	125	Australia	Australia	-17.37	145.97	Queensland tropical rain forests	Tropical & Subtropical Moist Broadleaf Forests	Australasia	no
547	Edward Gray, Thomas Neill; Prum, Sovanna	Leopard density in post-conflict landscape, Cambodia: Evidence from spatially explicit capture-recapture	JOURNAL OF WILDLIFE MANAGEMENT	2012	76	1	163	169	Cambodia	Asia	12.73	107.53	Central Indochina dry forests	Tropical & Subtropical Moist Broadleaf Forests	Indomalayan	no
548	Edwards, Sarah; Cooper, Sue; Uiseb, Kenneth; Hayward, Matt; Wachter, Bettina; Melzheimer, Joerg	Making the most of by-catch data: Assessing the feasibility of utilising non-target camera trap data for occupancy modelling of a large felid	AFRICAN JOURNAL OF ECOLOGY	2018	56	4	885	894	Namibia	Africa	-27.67	17.78	Gariep Karoo	Deserts & Xeric Shrublands	Afrotropic	no
549	Edwards, Sarah; Fischer, Manuela; Wachter, Bettina; Melzheimer, Joerg	Coping with intrasexual behavioral differences: Capture-recapture abundance estimation of male cheetah	ECOLOGY AND EVOLUTION	2018	8	18	9171	9180	Namibia	Africa	-22.41	19.2	Kalahari xeric savanna	Deserts & Xeric Shrublands	Afrotropic	no
550	Edwards, Sarah; Al Awaji, Malik; Eid, Ehab; Attum, Omar	Mammalian activity at artificial water sources in Dana Biosphere Reserve, southern Jordan	JOURNAL OF ARID ENVIRONMENTS	2017	141		52	55	Jordan	Asia	30.6887° N	35.58327° E	Eastern Mediterranean conifer-broadleaf forests	Mediterranean Forests, Woodlands & Scrub	Palearctic	no
551	Edwards, Sarah; Gange, Alan C.; Wiesel, Ingrid	An oasis in the desert: The potential of water sources as camera trap sites in arid environments for surveying a carnivore guild	JOURNAL OF ARID ENVIRONMENTS	2016	124		304	309	Namibia	Africa	-27.34	16.12	Namaqualand-Richtersveld steppe	Deserts & Xeric Shrublands	Afrotropic	no
552	Edwards, Sarah; Demski, Maike	Asiatic golden cat record from the Kulen-Promtep Wildlife Sanctuary, Cambodia.	Cat News	2012	57		32	32	Cambodia	Asia	14.12	104.57	Central Indochina dry forests	Tropical & Subtropical Moist Broadleaf Forests	Indomalayan	no
552	Edwards, Sarah; Demski, Maike	Asiatic golden cat record from the Kulen-Promtep Wildlife Sanctuary, Cambodia.	Cat News	2012	57		32	32	Cambodia	Asia	14.12	104.57	Southeast Indochina dry evergreen forests	Tropical & Subtropical Dry Broadleaf Forests	Indomalayan
553	Edwards, Sarah; Allison, James; Cheetham, Sarah; Hoeun, Bunto	Mammal and bird diversity at a salt lick in Kulen-Promtep Wildlife Sanctuary, Northern Cambodia.	Cambodian Journal of Natural History	2012	1		56	63	Cambodia	Asia	14.12	104.57	Southeast Indochina dry evergreen forests	Tropical & Subtropical Dry Broadleaf Forests	Indomalayan	no
554	Edwards, Sarah	Small carnivore records from the Oddar Meanchay sector of Kulen-Promtep Wildlife Sanctuary, northern Cambodia	Small Carnivore Conservation	2012	46		22	25	Cambodia	Asia	14.12	104.57	Southeast Indochina dry evergreen forests	Tropical & Subtropical Dry Broadleaf Forests	Indomalayan	no
555	Efford, Murray G.; Boulanger, John	Fast evaluation of study designs for spatially explicit capture-recapture	METHODS IN ECOLOGY AND EVOLUTION	2019	10	9	1529	1535
556	Efford, Murray G.; Borchers, David L.; Mowat, Garth	Varyingeffort incapture-recapture studies	METHODS IN ECOLOGY AND EVOLUTION	2013	4	7	629	636
557	Efford, Murray G.	Estimation of population density by spatially explicit capture-recapture analysis of data from area searches	ECOLOGY	2011	92	12	2202	2207
558	Efford, Murray G.; Dawson, Deanna K.; Borchers, David L.	Population density estimated from locations of individuals on a passive detector array	ECOLOGY	2009	90	10	2676	2682
559	Ekanayake, Kasun B.; Sutherland, Duncan R.; Dann, Peter; Weston, Michael A.	Out of sight but not out of mind: corvids prey extensively on eggs of burrow-nesting penguins	WILDLIFE RESEARCH	2015	42	6	509	517	Australia	Australia	146.367	38.0667	Southeast Australia temperate forests	Temperate Broadleaf & Mixed Forests	Australasia	no
561	El Algamy, Husam; Simkins, Greg	Camera trap survey in the Dubai Desert Conservation Reserve.	Wildlife Middle East News	2007	2	1	4	4	United Arab Emirates	Asia	24.86	55.63	Arabian sand desert	Deserts & Xeric shrublands	Palearctic	no
562	Elizondo, Elisa C.; Loss, Scott R.	Using trail cameras to estimate free-ranging domestic cat abundance in urban areas	WILDLIFE BIOLOGY	2016	22	5	246	252	USA	NA	36.13	-97.07	Central -Southern US mixed grasslands	Temperate Grasslands, Savannas & Shrublands	Nearctic	yes
562	Elizondo, Elisa C.; Loss, Scott R.	Using trail cameras to estimate free-ranging domestic cat abundance in urban areas	WILDLIFE BIOLOGY	2016	22	5	246	252	USA	NA	36.13	-97.07	Cross-Timbers savanna-woodland	Temperate Grasslands, Savannas & Shrublands	Nearctic
563	Elkan, P. W.; Parnell, R.; Smith, J. L. D.	A die-off of large ungulates following a Stomoxys biting fly out-break in lowland forest, northern Republic of Congo.	African Journal of Ecology	2009	47	4	528	536	Republic of Congo	Africa	2.5	16.57	Northwest Congolian lowland forests	Tropical & Subtropical Moist Broadleaf Forests	Afrotropic	no
566	Ellis, Jeremy W.; Shriner, Susan A.; McLean, Hailey E.; Petersen, Lauren; Root, J. Jeffrey	Inventory of wildlife use of mortality pits as feeding sites: implications of pathogen exposure	HUMAN-WILDLIFE INTERACTIONS	2017	11	1	8	18	USA	NA	40.62	-105.02	Colorado Rockies forests	Temperate Conifer Forests	Nearctic	yes
567	Ellis, Kristen S.; Larsen, Randy T.; Koons, David N.	The importance of functional responses among competing predators for avian nesting success	FUNCTIONAL ECOLOGY	2020	34	1	252	264	USA	NA	39°51?01?N	113°23?45?W	Great Basin shrub steppe	Deserts & Xeric Shrublands	Nearctic	no
568	Ellis, Kristen S.; Cavitt, John F.; Larsen, Randy T.; Koons, David N.	Using remote cameras to validate estimates of nest fate in shorebirds	IBIS	2018	160	3	681	687	USA	NA	39°51?01?N	113°23?45?W	Great Basin shrub steppe	Deserts & Xeric Shrublands	Nearctic	no
569	Ellis, Kristen S.; Larsen, Randy T.; Whiting, Jericho C.; Wilson, Tammy L.; McMillan, Brock R.	Assessing indirect measures of abundance and distribution with remote cameras: Simplifying indices of activity at pygmy rabbit burrows	ECOLOGICAL INDICATORS	2017	77		23	30	USA	NA	38.99	-112.51	Great Basin shrub steppe	Deserts & Xeric Shrublands	Nearctic	no
569	Ellis, Kristen S.; Larsen, Randy T.; Whiting, Jericho C.; Wilson, Tammy L.; McMillan, Brock R.	Assessing indirect measures of abundance and distribution with remote cameras: Simplifying indices of activity at pygmy rabbit burrows	ECOLOGICAL INDICATORS	2017	77		23	30	USA	NA	38.99	-112.51	Great Basin montane forests	Temperate Conifer Forests	Nearctic
570	Enari, Hiroto; Enari, Haruka; Okuda, Kei; Yoshita, Miho; Kuno, Takuya; Okuda, Kana	Feasibility assessment of active and passive acoustic monitoring of sika deer populations	ECOLOGICAL INDICATORS	2017	79		155	162	Japan	Asia	36.77	139.37	Nihonkai montane forests	Temperate Broadleaf & Mixed Forests	Palearctic	no
570	Enari, Hiroto; Enari, Haruka; Okuda, Kei; Yoshita, Miho; Kuno, Takuya; Okuda, Kana	Feasibility assessment of active and passive acoustic monitoring of sika deer populations	ECOLOGICAL INDICATORS	2017	79		155	162	Japan	Asia	36.77	139.37	Honshu alpine conifer forests	Temperate Conifer Forests	Palearctic
572	Eng, Robin Y. Y.; Jachowski, David S.	Evaluating detection and occupancy probabilities of eastern spotted skunks	JOURNAL OF WILDLIFE MANAGEMENT	2019	83	5	1244	1253	USA	NA	34.98	-83.07	Appalachian-Blue Ridge forests	Temperate Broadleaf & Mixed Forests	Nearctic	no
572	Eng, Robin Y. Y.; Jachowski, David S.	Evaluating detection and occupancy probabilities of eastern spotted skunks	JOURNAL OF WILDLIFE MANAGEMENT	2019	83	5	1244	1253	USA	NA	34.98	-83.07	Appalachian Piedmont forests	Temperate Broadleaf & Mixed Forests	Nearctic
574	Engeman, Richard M.; Kaiser, Bernard W.; Osorio, Kimberly J.	Evaluating methods to detect and monitor populations of a large invasive lizard: the Argentine giant tegu	ENVIRONMENTAL SCIENCE AND POLLUTION RESEARCH	2019	26	31	31717	31729	USA	NA	27.76	-82.22	Southeast US conifer savannas	Temperate Grasslands, Savannas & Shrublands	Nearctic	no
575	Enoki, Tsutomu; Yabe, Tsuneaki; Koizumi, Toru	Changes in spatial patterns of sika deer distribution and herbivory of planted seedlings: a comparison before and after deer population control by culling	JOURNAL OF FOREST RESEARCH	2016	21	2	84	91	Japan	Asia	32.38	131.195	Taiheiyo evergreen forest	Temperate Broadleaf & Mixed Forests	Palearctic	no
575	Enoki, Tsutomu; Yabe, Tsuneaki; Koizumi, Toru	Changes in spatial patterns of sika deer distribution and herbivory of planted seedlings: a comparison before and after deer population control by culling	JOURNAL OF FOREST RESEARCH	2016	21	2	84	91	Japan	Asia	32.38	131.195	Taiheiyo montane deciduous forests	Temperate Broadleaf & Mixed Forests	Palearctic
576	Enric Peris, Josep; Maria Malara, Tatiane; Borges, Roberta; Ricardo Falconi, Jose; Pena, Leandro; Maria Fedriani, Jose	Reunion overseas: introduced wild boars and cultivated orange trees interact in the Brazilian Atlantic Forest	REVISTA DE BIOLOGIA TROPICAL	2019	67	4	901	912	Brazil	SA	21°38’ S	48°31’ W	Cerrado	Tropical & Subtropical Grasslands, Savannas & Shrublands	Neotropic	yes
577	Eric Ramirez-Bravo, Osvaldo; Hernandez-Santin, Lorna	New records of tepezcuincle (Cuniculus paca) in Puebla, Central Mexico	REVISTA MEXICANA DE BIODIVERSIDAD	2012	83	3	872	874	Mexico	NA	20°12’47” N	97°54’38” W	Veracruz montane forests	Tropical & Subtropical Moist Broadleaf Forests	Neotropic
577	Eric Ramirez-Bravo, Osvaldo; Hernandez-Santin, Lorna	New records of tepezcuincle (Cuniculus paca) in Puebla, Central Mexico	REVISTA MEXICANA DE BIODIVERSIDAD	2012	83	3	872	874	Mexico	NA	20°43’56” N	97°50’59” W	Veracruz moist forests	Tropical & Subtropical Moist Broadleaf Forests	Neotropic
578	Escobar-Lasso, Sergio; Gil-Fernandez, Margarita; Herrera, Hansel; Fonseca, Luis G.; Carrillo-Jimenez, Eduardo; Saenz, Joel; Wong, Grace	Scavenging on sea turtle carcasses by multiple jaguars in Northwestern Costa Rica	Therya	2016	7	2	231	239	Costa Rica	NA	10.8	-85.68	Central American dry forests	Tropical & Subtropical Dry Broadleaf Forests	Neotropic	no
579	Espinosa, Martin; Cepeda-Mercado, Amancay A.; Louit, Carla; Melendez, Mario; Gonzalez-Maya, Jose F.	PAMPAS CAT LEOPARDUS COLOCOLO IN THE ATACAMA DESERT: FIRST RECORDS FROM LLANOS DE CHALLE NATIONAL PARK, CHILE	Museo Nacional de Historia Natural Boletin (Santiago)	2014	63		111	118	Chile	SA	-27.67	-68.16	Central Andean dry puna	Montane Grasslands & Shrublands	Neotropic	no
579	Espinosa, Martin; Cepeda-Mercado, Amancay A.; Louit, Carla; Melendez, Mario; Gonzalez-Maya, Jose F.	PAMPAS CAT LEOPARDUS COLOCOLO IN THE ATACAMA DESERT: FIRST RECORDS FROM LLANOS DE CHALLE NATIONAL PARK, CHILE	Museo Nacional de Historia Natural Boletin (Santiago)	2014	63		111	118	Chile	SA	-27.67	-68.16	Central Andean puna	Montane Grasslands & Shrublands	Neotropic
579	Espinosa, Martin; Cepeda-Mercado, Amancay A.; Louit, Carla; Melendez, Mario; Gonzalez-Maya, Jose F.	PAMPAS CAT LEOPARDUS COLOCOLO IN THE ATACAMA DESERT: FIRST RECORDS FROM LLANOS DE CHALLE NATIONAL PARK, CHILE	Museo Nacional de Historia Natural Boletin (Santiago)	2014	63		111	118	Chile	SA	-27.67	-68.16	High Monte	Montane Grasslands & Shrublands	Neotropic
580	Espinoza-Medinilla, Eduardo E.; Torres-Romero, Erik J.; Antonio Tarango-Arambula, L.	ADDITIONAL RECORDS OF WILD MAMMALS IN THE FOREST MANAGEMENT AREA: LOS OCOTONES, CHIAPAS, MEXICO	AGROCIENCIA	2018	52	4	553	562	Mexico	NA	16° 38’ 59” N	93° 47’ 59” W	Chiapas Depression dry forests	Tropical & Subtropical Dry Broadleaf Forests	Neotropic	no
581	Esser, Helen J.; Liefting, Yorick; Kays, Roland; Jansen, Patrick A.	A record of Striped Hog-nosed Skunk Conepatus semistriatus in central Panama, between two known sub-ranges	Small Carnivore Conservation	2012	47		62	64	Panama	NA	9°9'42.985"N	79°53'7.684"W	Isthmian-Atlantic moist forests	Tropical & Subtropical Moist Broadleaf Forests	Neotropic	no
582	Estienne, Vittoria; Stephens, Colleen; Boesch, Christophe	Extraction of honey from underground bee nests by central African chimpanzees (Pan troglodytes troglodytes) in Loango National Park, Gabon: Techniques and individual differences	AMERICAN JOURNAL OF PRIMATOLOGY	2017	79	8			Gabon	Africa	2°04?S	9°33?E	Congolian coastal forests	Tropical & Subtropical Moist Broadleaf Forests	Afrotropic	no
583	Estienne, Vittoria; Mundry, Roger; Kuehl, Hjalmar S.; Boesch, Christophe	Exploitation of underground bee nests by three sympatric consumers in Loango National Park, Gabon	BIOTROPICA	2017	49	1	101	109	Gabon	Africa	2°04?S	9°33?E	Congolian coastal forests	Tropical & Subtropical Moist Broadleaf Forests	Afrotropic	no
585	Estrela, Dieferson da Costa; de Souza, Daniele Cipriano; de Souza, Joyce Moreira; da Silva Castro, Andre Luis	Medium and large-sized mammals in a Cerrado area of the state of Goias, Brazil.	Check List	2015	11	4	1690	1690	Brazil	SA	-17.46	-48.2	Cerrado	Tropical & Subtropical Grasslands, Savannas & Shrublands	Neotropic	no
586	Evans, Bryn E.; Mosby, Cory E.; Mortelliti, Alessio	Assessing arrays of multiple trail cameras to detect North American mammals	PLOS ONE	2019	14	6			USA	NA	46.2455	-68.7348	New England-Acadian forests	Temperate Broadleaf & Mixed Forests	Nearctic	no
587	Evans, Michael J.; Rittenhouse, Tracy A. G.	Evaluating spatially explicit density estimates of unmarked wildlife detected by remote cameras	JOURNAL OF APPLIED ECOLOGY	2018	55	6	2565	2574	USA	NA	41.73	-73.15	New England-Acadian forests	Temperate Broadleaf & Mixed Forests	Nearctic
588	Evrard, Quentin; Hardy, Olivier J.; Tagg, Nikki; Doucet, Jean-Louis	Removal and predation of aril-covered seeds: the case of Afzelia bipindensis (Fabaceae - Detarioidae)	PLANT ECOLOGY AND EVOLUTION	2019	152	3	460	469	Gabon	Africa	-0.83	12.73	Northwest Congolian lowland forests	Tropical & Subtropical Moist Broadleaf Forests	Afrotropic	no
588	Evrard, Quentin; Hardy, Olivier J.; Tagg, Nikki; Doucet, Jean-Louis	Removal and predation of aril-covered seeds: the case of Afzelia bipindensis (Fabaceae - Detarioidae)	PLANT ECOLOGY AND EVOLUTION	2019	152	3	460	469	Cameroon	Africa	3.56	13.43	Northwest Congolian lowland forests	Tropical & Subtropical Moist Broadleaf Forests	Afrotropic	no
590	Faison, Edward K.; DeStefano, Stephen; Foster, David R.; Rapp, Joshua M.; Compton, Justin A.	Multiple Browsers Structure Tree Recruitment in Logged Temperate Forests	PLOS ONE	2016	11	11			USA	NA	42.43	-72.23	Northeast US Coastal forests	Temperate Broadleaf & Mixed Forests	Nearctic	no
590	Faison, Edward K.; DeStefano, Stephen; Foster, David R.; Rapp, Joshua M.; Compton, Justin A.	Multiple Browsers Structure Tree Recruitment in Logged Temperate Forests	PLOS ONE	2016	11	11			USA	NA	42.43	-72.23	New England-Acadian forests	Temperate Broadleaf & Mixed Forests	Nearctic
591	Faison, Edward K.; DeStefano, Stephen; Foster, David R.; Plotkin, Audrey Barker	Functional response of ungulate browsers in disturbed eastern hemlock forests	FOREST ECOLOGY AND MANAGEMENT	2016	362		177	183	USA	NA	42.43	-72.23	Northeast US Coastal forests	Temperate Broadleaf & Mixed Forests	Nearctic	no
591	Faison, Edward K.; DeStefano, Stephen; Foster, David R.; Plotkin, Audrey Barker	Functional response of ungulate browsers in disturbed eastern hemlock forests	FOREST ECOLOGY AND MANAGEMENT	2016	362		177	183	USA	NA	42.43	-72.23	New England-Acadian forests	Temperate Broadleaf & Mixed Forests	Nearctic
592	Falcao, Fabio de Carvalho; Areas Guanaes, Deyna Hulda; Paglia, Adriano	Medium and large-sized mammals of RPPN Estacao Veracel, southernmost Bahia, Brazil.	Check List	2012	8	5	929	934	Brazil	SA	-16.35	-39.03	Bahia coastal forests	Tropical & Subtropical Moist Broadleaf Forests	Neotropic	no
593	Fancourt, Bronwyn A.; Sweaney, Mark; Fletcher, Don B.	More haste, less speed: pilot study suggests camera trap detection zone could be more important than trigger speed to maximise species detections	AUSTRALIAN MAMMALOGY	2018	40	1	118	121	Australia	Australia	-35.1746	149.175	Eastern Australian temperate forests	Temperate Broadleaf & Mixed Forests	Australasia	no
594	Fancourt, Bronwyn A.	Avoiding the subject: the implications of avoidance behaviour for detecting predators	BEHAVIORAL ECOLOGY AND SOCIOBIOLOGY	2016	70	9	1535	1546	Australia	Australia	-42.14	147.18	Tasmanian temperate rain forests	Temperate Broadleaf & Mixed Forests	Australasia	no
594	Fancourt, Bronwyn A.	Avoiding the subject: the implications of avoidance behaviour for detecting predators	BEHAVIORAL ECOLOGY AND SOCIOBIOLOGY	2016	70	9	1535	1546	Australia	Australia	-42.14	147.18	Tasmanian temperate forests	Temperate Broadleaf & Mixed Forests	Australasia
594	Fancourt, Bronwyn A.	Avoiding the subject: the implications of avoidance behaviour for detecting predators	BEHAVIORAL ECOLOGY AND SOCIOBIOLOGY	2016	70	9	1535	1546	Australia	Australia	-42.14	147.18	Tasmanian Central Highland forests	Temperate Broadleaf & Mixed Forests	Australasia
595	Fancourt, Bronwyn A.	Rapid decline in detections of the Tasmanian bettong (Bettongia gaimardi) following local incursion of feral cats (Felis catus)	AUSTRALIAN MAMMALOGY	2014	36	2	247	253	Australia	Australia	-43.0233	146.914	Tasmanian temperate rain forests	Temperate Broadleaf & Mixed Forests	Australasia	yes
596	Fang, Yi-Hao; Li, Yan-Peng; Ren, Guo-Peng; Huang, Zhi-Pang; Cui, Liang-Wei; Zhang, Li-Xiang; Garber, Paul A.; Pan, Ru-Liang; Xiao, Wen	The effective use of camera traps to document the northernmost distribution of the western black crested gibbon in China	PRIMATES	2020	61	2	151	158	China	Asia	23° 40? N	99° 29? E	Northern Indochina subtropical forests	Tropical & Subtropical Moist Broadleaf Forests	Indomalayan	no
597	Fang, Yi-Hao; Gao, Ying; Yang, Yin; Tan, Kun; Li, Yan-Peng; Ren, Guo-Peng; Huang, Zhi-Pang; Cui, Liang-Wei; Xiao, Wen	Effects of reflective warning markers on wildlife	PEERJ	2019	7				China	Asia	25°40?N	100°11?E	Yunnan Plateau subtropical evergreen forests	Tropical & Subtropical Moist Broadleaf Forests	Indomalayan	no
598	Fang, Yihao; Ren, Guopeng; Gao, Ying; Zhang, Shuxia; Wang, Haohan; Li, Yanpeng; Huang, Zhipang; Cui, Liangwei; Xiao, Wen	Impact of ground and canopy camera-trapping installation on wildlife monitoring	Biodiversity Science	2018	26	7	717	726	China	Asia	25.91	99.08	Northern Indochina subtropical forests	Tropical & Subtropical Moist Broadleaf Forests	Indomalayan	no
600	Farhadinia, Mohammad; Nezami, Bagher; Mahdavi, Alireza; Hatami, Kaveh	Photos of Persian leopard in Alborz Mountains, Iran.	Cat News	2007	46		34	35	Iran	Asia	36.4625	51.3761	Caspian Hyrcanian mixed forests	Temperate Broadleaf & Mixed Forests	Palearctic	no
601	Farhadinia, Mohammad S.; McClintock, BrettT; Johnson, Paul J.; Behnoud, Pouyan; Hobeali, Kaveh; Moghadas, Peyman; Hunter, Luke T. B.; Macdonald, David W.	A paradox of local abundance amidst regional rarity: the value of montane refugia for Persian leopard conservation	SCIENTIFIC REPORTS	2019	9				Iran	Asia	37.4	58.23	Kopet Dag woodlands and forest steppe	Montane Grasslands & Shrublands	Palearctic	no
601	Farhadinia, Mohammad S.; McClintock, BrettT; Johnson, Paul J.; Behnoud, Pouyan; Hobeali, Kaveh; Moghadas, Peyman; Hunter, Luke T. B.; Macdonald, David W.	A paradox of local abundance amidst regional rarity: the value of montane refugia for Persian leopard conservation	SCIENTIFIC REPORTS	2019	9				Iran	Asia	37.4	58.23	Elburz Range forest steppe	Temperate Conifer Forests	Palearctic
602	Farhadinia, Mohammad S.; Alinezhad, Hossein; Hadipour, Ehsan; Memarian, Iman; Ostrowski, Stephane; Hobeali, Kaveh; Dadashi-Jourdehi, Amirhossein; Johnson, Paul J.; Macdonald, David W.; Hunter, Luke T. B.	Intraspecific killing among Leopards (Panthera pardus) in Iran (Mammalia: Felidae)	ZOOLOGY IN THE MIDDLE EAST	2018	64	3	189	194	Iran	Asia	36.79°N	49.84°E	Elburz Range forest steppe	Temperate Conifer Forests	Palearctic	no
602	Farhadinia, Mohammad S.; Alinezhad, Hossein; Hadipour, Ehsan; Memarian, Iman; Ostrowski, Stephane; Hobeali, Kaveh; Dadashi-Jourdehi, Amirhossein; Johnson, Paul J.; Macdonald, David W.; Hunter, Luke T. B.	Intraspecific killing among Leopards (Panthera pardus) in Iran (Mammalia: Felidae)	ZOOLOGY IN THE MIDDLE EAST	2018	64	3	189	194	Iran	Asia	36.79°N	49.84°E	Kopet Dag woodlands and forest steppe	Montane Grasslands & Shrublands	Palearctic	no
603	Farhadinia, Mohammad S.; Hunter, Luke T. B.; Jourabchian, Alireza; Hosseini-Zavarei, Fatemeh; Akbari, Hasan; Ziaie, Hooshang; Schaller, George B.; Jowkar, Houman	The critically endangered Asiatic cheetah Acinonyx jubatus venaticus in Iran: a review of recent distribution, and conservation status	BIODIVERSITY AND CONSERVATION	2017	26	5	1027	1046	Iran	Asia	31.75	55.75	Central Persian desert basins	Deserts & Xeric Shrublands	Palearctic	no
604	Farhadinia, Mohammad S.; Moqanaki, Ehsan M.; Hosseini-Zavarei, Fatemeh	Predator-prey relationships in a middle Asian Montane steppe: Persian leopard versus urial wild sheep in Northeastern Iran	EUROPEAN JOURNAL OF WILDLIFE RESEARCH	2014	60	2	341	349	Iran	Asia	37° 02? N	57° 41 E	Elburz Range forest steppe	Temperate Conifer Forests	Palearctic	no
605	Farias, Ariel A.; Sepulveda, Maximiliano A.; Silva-Rodriguez, Eduardo A.; Eguren, Antonieta; Gonzalez, Danilo; Jordan, Natalia I.; Ovando, Erwin; Stowhas, Paulina; Svensson, Gabriella L.	A new population of Darwin's fox (Lycalopex fulvipes) in the Valdivian Coastal Range	REVISTA CHILENA DE HISTORIA NATURAL	2014	87				Chile	SA	40° 02? S	73° 35? W	Valdivian temperate forests	Temperate Broadleaf & Mixed Forests	Neotropic	no
606	Farr, Cooper M.; Pejchar, Liba; Reed, Sarah E.	Subdivision design and stewardship affect bird and mammal use of conservation developments	ECOLOGICAL APPLICATIONS	2017	27	4	1236	1252	USA	NA	40.25	-105.41	Colorado Rockies forests	Temperate Conifer Forests	Nearctic	yes
607	Farris, Z. J.; Kelly, M. J.; Karpanty, S. M.; Ratelolahy, F.; Andrianjakarivelo, V.; Holmes, C.	Brown-tailed Vontsira Salanoia concolor (Eupleridae) documented in Makira Natural Park, Madagascar: new insights on distribution and camera-trap success	Small Carnivore Conservation	2012	47		82	86	Madagascar	Africa	15°11'40"S	49° 37'13"E	Madagascar humid forests	Tropical & Subtropical Moist Broadleaf Forests	Afrotopic	no
608	Farris, Zach J.; Karpanty, Sarah M.; Ratelolahy, Felix; Kelly, Marcella J.	Predator-Primate Distribution, Activity, and Co-occurrence in Relation to Habitat and Human Activity Across Fragmented and Contiguous Forests in Northeastern Madagascar	INTERNATIONAL JOURNAL OF PRIMATOLOGY	2014	35	5	859	880	Madagascar	Africa	-15.28	49.75	Madagascar humid forests	Tropical & Subtropical Moist Broadleaf Forests	Afrotopic	no
609	Favaro, Brett; Lichota, Corinna; Cote, Isabelle M.; Duff, Stefanie D.	TrapCam: an inexpensive camera system for studying deep-water animals	METHODS IN ECOLOGY AND EVOLUTION	2012	3	1	39	46	Canada	NA	49°25?30??N	123°20?00??W	British Columbia coastal conifer	Temperate Conifer Forests	Nearctic	no
610	Fegraus, Eric H.; Lin, Kai; Ahumada, Jorge A.; Baru, Chaitan; Chandra, Sandeep; Youn, Choonhan	Data acquisition and management software for camera trap data: A case study from the TEAM Network	ECOLOGICAL INFORMATICS	2011	6	6	345	353
611	Felizola Diniz-Filho, Jose Alexandre; Silveira, Leandro; Jacomo, Anah T. A.; Bini, Luis Mauricio; Ramos-Neto, Mario B.; Torres, Natalia Mundim	Spatial autocorrelation of mammalian richness and abundance along the Cerrado-Pantanal corridor, Central Brazil	Neotropical Biology and Conservation	2008	3	3	103	111	Brazil	SA	-18.15	-52.94	Cerrado	Tropical & Subtropical Grasslands, Savannas & Shrublands	Neotropic	no
612	Feng, Limin; Shevtsova, Elena; Vitkalova, Anna; Matyukhina, Dina; Miquelle, Dale; Aramilev, Vladimir; Wang, Tianming; Mu, Pu; Xu, Rumei; Ge, Jianping	Collaboration brings hope for the last Amur leopards.	Cat News	2017	65		32	32	China	Asia	43.23	131.2	Manchurian mixed forest	Temperate Broadleaf & Mixed Forests	Palearctic	no
612	Feng, Limin; Shevtsova, Elena; Vitkalova, Anna; Matyukhina, Dina; Miquelle, Dale; Aramilev, Vladimir; Wang, Tianming; Mu, Pu; Xu, Rumei; Ge, Jianping	Collaboration brings hope for the last Amur leopards.	Cat News	2017	65		32	32	Russia	Asia
613	Feng, Liming; Wang, Tianming; Mou, Pu; Kou, Xiaojun; Ge, Jianping	First image of an Amur leopard recorded in China.	Cat News	2011	55	1	9	9	China	Asia	42.84	130.73	Manchurian mixed forest	Temperate Broadleaf & Mixed Forests	Palearctic	no
614	Fernandez, Christopher M.; Alvarez, Maria D. Vera; Cove, Michael, V	Heightened nest loss in tropical forest fragments despite higher predator load in core forest	TROPICAL ECOLOGY	2019	60	2	281	287	Costa Rica	NA	10.64	-84.07	Isthmian-Atlantic moist forests	Tropical & Subtropical Moist Broadleaf Forests	Neotropic	no
615	Ferreguetti, Atilla C.; Tomas, Walfrido M.; Bergallo, Helena G.	Patch occupancy and activity pattern of the spotted paca (Cuniculus paca Linnaeus, 1766) in a protected area of the Atlantic Forest, Brazil	MAMMALIA	2019	83	4	363	371	Brazil	SA	19°18? S	40°19? W	Bahia coastal forests	Tropical & Subtropical Moist Broadleaf Forests	Neotropic	no
616	Ferreguetti, Atilla C.; Tomas, Walfrido M.; Bergallo, Helena G.	DIFFERENCES IN THE MAMMALIAN HABITAT USE IN A MOSAIC OF VEGETATION TYPES OF AN ATLANTIC RAIN-FOREST RESERVE, BRAZIL	Mastozoologia Neotropical	2017	24	2	355	364	Brazil	SA	19°18? S	40°19? W	Bahia coastal forests	Tropical & Subtropical Moist Broadleaf Forests	Neotropic	no
617	Ferreguetti, Atilla C.; Tomas, Walfrido M.; Bergallo, Helena G.	Density, occupancy, and detectability of lowland tapirs, Tapirus terrestris, in Vale Natural Reserve, southeastern Brazil	JOURNAL OF MAMMALOGY	2017	98	1	114	123	Brazil	SA	19°18? S	40°19? W	Bahia coastal forests	Tropical & Subtropical Moist Broadleaf Forests	Neotropic	no
618	Ferreguetti, Atilla C.; Tomas, Walfrido M.; Bergallo, Helena G.	Density, occupancy, and activity pattern of two sympatric deer (Mazama) in the Atlantic Forest, Brazil	JOURNAL OF MAMMALOGY	2015	96	6	1245	1254	Brazil	SA	19°18? S	40°19? W	Bahia coastal forests	Tropical & Subtropical Moist Broadleaf Forests	Neotropic	no
619	Ferreguetti, Atilla Colombo; Motta Lessa, Isadora Cristina; Vieira, Emerson Monteiro; Cunha, Andre Almeida; Bergallo, Helena Godoy	Medium- and large-sized mammal composition in the Chapada dos Veadeiros National Park and adjacent areas, state of Goias, Brazil	Papeis Avulsos de Zoologia (Sao Paulo)	2019	59		e20195942	Article No.: e20195942	Brazil	SA	14°10’S	47°42’W	Cerrado	Tropical & Subtropical Grasslands, Savannas & Shrublands	Neotropic	no
620	Ferreguetti, Atilla Colombo; Pereira-Ribeiro, Juliane; Bergallo, Helena Godoy; Duarte Rocha, Carlos Frederico	Abundance, density and activity of Salvator merianae (Reptilia: Teiidae) and the effect of poaching on the site occupancy by the lizard in an Atlantic Forest Reserve, Brazil	AUSTRAL ECOLOGY	2018	43	6	663	671	Brazil	SA	19°18? S	40°19? W	Bahia coastal forests	Tropical & Subtropical Moist Broadleaf Forests	Neotropic	no
621	Ferreguetti, Atilla Colombo; Pereira-Ribeiro, Juliane; Tomas, Walfrido Moraes; Bergallo, Helena Godoy; Duarte Rocha, Carlos Frederico	Density, habitat use, and activity patterns of a vulnerable population of the Solitary Tinamou (Tinamus solitarius) in a Brazilian Atlantic Forest fragment	CANADIAN JOURNAL OF ZOOLOGY	2018	96	3	245	252	Brazil	SA	19°18? S	40°19? W	Bahia coastal forests	Tropical & Subtropical Moist Broadleaf Forests	Neotropic	no
622	Ferreguetti, Atilla Colombo; Davis, Courtney Lynn; Tomas, Walfrido Moraes; Bergallo, Helena Godoy	Using activity and occupancy to evaluate niche partitioning: the case of two peccary species in the Atlantic Rainforest, Brazil	HYSTRIX-ITALIAN JOURNAL OF MAMMALOGY	2018	29	2	168	174	Brazil	SA	19°18? S	40°19? W	Bahia coastal forests	Tropical & Subtropical Moist Broadleaf Forests	Neotropic	no
623	Ferreguetti, Atilla Colombo; Tomas, Walfrido Moraes; Bergallo, Helena Godoy	Density, habitat use, and daily activity patterns of the Red-rumped Agouti (Dasyprocta leporina) in the Atlantic Forest, Brazil	STUDIES ON NEOTROPICAL FAUNA AND ENVIRONMENT	2018	53	2	143	151	Brazil	SA	19°18? S	40°19? W	Bahia coastal forests	Tropical & Subtropical Moist Broadleaf Forests	Neotropic	no
624	Ferreguetti, Atilla Colombo; Tomas, Walfrido M.; Bergallo, Helena G.	Density and niche segregation of two armadillo species (Xenarthra: Dasypodidae) in the Vale Natural Reserve, Brazil	MAMMALIAN BIOLOGY	2016	81	2	138	145	Brazil	SA	19°18? S	40°19? W	Bahia coastal forests	Tropical & Subtropical Moist Broadleaf Forests	Neotropic	no
625	Ferreira, Guilhereme Braga; Rabelo Oliveira, Marcelo Juliano; De Paula, Rogerio Cunha; Guimaraes Rodrigues, Flavio Henrique; Cunha Carmo, Erica Daniele	Regionally extinct species rediscovered: the bush dog Speothos venaticus in Minas Gerais, south-eastern Brazil	ORYX	2015	49	1	60	63	Brazil	SA	-15.01	-44.64	Brazilian Atlantic dry forests	Tropical & Subtropical Dry Broadleaf Forests	Neotropic	no
626	Ferreira, Guilherme B.; Ahumada, Jorge A.; Oliveira, Marcelo J. R.; de Pinho, Fernando F.; Barata, Izabela M.; Carbone, Chris; Collen, Ben	Assessing the conservation value of secondary savanna for large mammals in the Brazilian Cerrado	BIOTROPICA	2017	49	5	734	744	Brazil	SA	-15.01	-44.64	Brazilian Atlantic dry forests	Tropical & Subtropical Dry Broadleaf Forests	Neotropic	no
628	Ferreira-Rodriguez, Noe; Pombal, Manuel A.	Bait effectiveness in camera trap studies in the Iberian Peninsula	MAMMAL RESEARCH	2019	64	2	155	164	Portugal	Europe	41.79	-8.63	Cantabrian mixed forests	Temperate Broadleaf & Mixed Forests	Palearctic	no
629	Fidino, Mason A.; Lehrer, Elizabeth W.; Magle, Seth B.	Habitat Dynamics of the Virginia Opossum in a Highly Urban Landscape	AMERICAN MIDLAND NATURALIST	2016	175	2	155	167	USA	NA	41.8375	-87.6819	Central US forest-grasslands transition	Temperate Grasslands, Savannas & Shrublands	Nearctic	yes
630	Fiehler, Craig M.; Cypher, Brian L.; Bremner-Harrison, Samantha; Pounds, Dennis	A theft-resistant adjustable security box for digital cameras	JOURNAL OF WILDLIFE MANAGEMENT	2007	71	6	2077	2080	USA	NA	35.28	-118.72	California Central Valley grasslands	Temperate Grasslands, Savannas & Shrublands	Nearctic	yes
631	Fifield, Virginia L.; Rossi, Anna J.; Boydston, Erin E.	Documentation of mountain lions in Marin County, California, 2010-2013	CALIFORNIA FISH AND GAME	2015	101	1	66	71	USA	NA	38.06	-122.8	Northern California coastal forests	Temperate Conifer Forests	Nearctic	no
631	Fifield, Virginia L.; Rossi, Anna J.; Boydston, Erin E.	Documentation of mountain lions in Marin County, California, 2010-2014	CALIFORNIA FISH AND GAME	2015	101	1	66	71	USA	NA	38.06	-122.8	California interior chaparral and woodlands	Mediterranean Forests, Woodlands & Scrub	Nearctic
632	Figel, Joe J.; Botero-Canola, Sebastian; Forero-Medina, German; David Sanchez-Londono, Juan; Valenzuela, Leonor; Noss, Reed F.	Wetlands are keystone habitats for jaguars in an intercontinental biodiversity hotspot	PLOS ONE	2019	14	9			Colombia	SA	7°52? N	-74°22? W	Magdalena Valley montane forests	Tropical & Subtropical Moist Broadleaf Forests	Neotropic	no
633	Figel, Joe J.; Botero-Canola, Sebastian; David Sanchez-Londono, Juan; Noss, Reed F.	Species responses to oil palm: Cautionary considerations for multi-site extrapolation	BIOLOGICAL CONSERVATION	2019	229		179	180
634	Figel, Joe J.; Ruiz-Gutierrez, Fernando; Brown, David E.	Densities and perceptions of jaguars in coastal Nayarit, Mexico	WILDLIFE SOCIETY BULLETIN	2016	40	3	506	513	Mexico	NA	105°17?W	21°32?N	Jalisco dry forests	Tropical & Subtropical Dry Broadleaf Forests	Neotropic	no
635	Figel, Joe J.; Botero-Canola, Sebastian; David Sanchez-Londono, Juan; Quintero-Angel, Andres	Unexpected documentation and inter-Andean range expansion of a vulnerable large mammal (Mammalia, Pilosa, Myrmecophaga tridactyla) in Colombia	MAMMALIA	2016	80	4	449	452	Colombia	SA	7.68	-73.64	Magdalena-Urabá moist forests	Tropical & Subtropical Moist Broadleaf Forests	Neotropic	no
636	Figel, Joe J.; Duran, Elvira; Barton Bray, David; Prisciliano-Vazquez, Jose-Rogelio	New jaguar records from montane forest at a priority site in southern Mexico.	Cat News	2009	50		14	15	Mexico	NA	17.77	-96.14	Petén-Veracruz moist forests	Tropical & Subtropical Moist Broadleaf Forests	Neotropic	no
637	Filipczykova, Eva; Heitkonig, Ignas M. A.; Castellanos, Armando; Hantson, Wouter; Steyaert, Sam M. J. G.	Marking behavior of Andean bears in an Ecuadorian cloud forest: a pilot study	URSUS	2016	27	2	122	128	Ecuador	SA	0	-78	Eastern Cordillera Real montane forests	Tropical & Subtropical Moist Broadleaf Forests	Neotropic	no
638	Findlay, Melanie A.; Briers, Robert A.; Diamond, Neil; White, Patrick J. C.	Developing an empirical approach to optimal camera-trap deployment at mammal resting sites: evidence from a longitudinal study of an otter Lutra lutra holt	EUROPEAN JOURNAL OF WILDLIFE RESEARCH	2017	63	6			UK	Europe	56.1	-5.03	Celtic broadleaf forests	Temperate Broadleaf & Mixed Forests	Palearctic	no
639	Finerty, Genevieve E.; Bahaa-el-Din, Laila; Henley, Stephen; Kesch, M. Kristina; Seymour-Smith, Justin; Van der Weyde, Leanne K.; Macdonald, David W.; Loveridge, Andrew J.	Range expansion: Servals spotted in the Kalahari.	Cat News	2019	69		9	11	Botswana	Africa	-22.6	23.93	Kalahari xeric savanna	Deserts & Xeric Shrublands	Afrotropic	no
639	Finerty, Genevieve E.; Bahaa-el-Din, Laila; Henley, Stephen; Kesch, M. Kristina; Seymour-Smith, Justin; Van der Weyde, Leanne K.; Macdonald, David W.; Loveridge, Andrew J.	Range expansion: Servals spotted in the Kalahari.	Cat News	2019	69		9	11	Zimbabwe	Africa	-19.19	26.59	Zambezian Baikiaea woodlands	Tropical & Subtropical Grasslands, Savannas & Shrublands	Afrotropic
640	Fischer, Claude; Tagand, Romain; Hausser, Yves	Diversity and distribution of small carnivores in a miombo woodland within the Katavi region, Western Tanzania	Small Carnivore Conservation	2013	48		60	66	Tanzania	Africa	6 S	31.0 E	Central Zambezian wet miombo woodlands	Tropical & Subtropical Grasslands, Savannas & Shrublands	Afrotropic	no
641	Fischer, Johannes H.; Jones, Samuel E., I; Brodie, Jedediah F.; Marshall, Andrew J.; Setiawan, Endro; Wain, Agusdin; van Berkel, Tim B. T.; Wearn, Oliver R.; van der Kaaden, Anna; Granados, Alys; Mathai, John; Cheyne, Susan M.; Denny, Matthew J. H.	The potential value of camera-trap studies for identifying, ageing, sexing and studying the phenology of Bornean Lophura pheasants	FORKTAIL	2017		33	92	102	Indonesia	Asia	0.61	114.61	Borneo lowland rain forests	Tropical & Subtropical Moist Broadleaf Forests	Indomalayan	no
641	Fischer, Johannes H.; Jones, Samuel E., I; Brodie, Jedediah F.; Marshall, Andrew J.; Setiawan, Endro; Wain, Agusdin; van Berkel, Tim B. T.; Wearn, Oliver R.; van der Kaaden, Anna; Granados, Alys; Mathai, John; Cheyne, Susan M.; Denny, Matthew J. H.	The potential value of camera-trap studies for identifying, ageing, sexing and studying the phenology of Bornean Lophura pheasants	FORKTAIL	2017		33	92	102	Malaysia	Asia	1.92	113.6	Borneo montane rain forests	Tropical & Subtropical Moist Broadleaf Forests	Indomalayan
641	Fischer, Johannes H.; Jones, Samuel E., I; Brodie, Jedediah F.; Marshall, Andrew J.; Setiawan, Endro; Wain, Agusdin; van Berkel, Tim B. T.; Wearn, Oliver R.; van der Kaaden, Anna; Granados, Alys; Mathai, John; Cheyne, Susan M.; Denny, Matthew J. H.	The potential value of camera-trap studies for identifying, ageing, sexing and studying the phenology of Bornean Lophura pheasants	FORKTAIL	2017		33	92	102	Malaysia	Asia	1.92	113.6	Borneo peat swamp forests	Tropical & Subtropical Moist Broadleaf Forests	Indomalayan
642	Fischer, Johannes H.; Debski, Igor; Taylor, Graeme A.; Wittmer, Heiko U.	Assessing the suitability of non-invasive methods to monitor interspecific interactions and breeding biology of the South Georgian diving petrel (Pelecanoides georgicus)	NOTORNIS	2017	64	1	13	20	New Zealand	Zealandia	-46.766	167.645	Rakiura Island temperate forests	Temperate Broadleaf & Mixed Forests	Australasia	no
643	Fjalling, Arne; Kleiner, Jenny; Beszczynska, Magdalena	Evidence that grey seals (Halichoerus grypus) use above-water vision to locate baited buoys.	NAMMCO Scientific Publications	2007	6		215	227	Sweden	Europe	58.6333	16.8	Sarmatic mixed forests	Temperate Broadleaf & Mixed Forests	Palearctic	no
643	Fjalling, Arne; Kleiner, Jenny; Beszczynska, Magdalena	Evidence that grey seals (Halichoerus grypus) use above-water vision to locate baited buoys.	NAMMCO Scientific Publications	2007	6		215	227	Sweden	Europe	58.6333	16.8	Scandinavian and Russian taiga	Boreal Forests/Taiga	Palearctic
645	Fleschutz, Mira M.; Galvez, Nicolas; Pe'er, Guy; Davies, Zoe G.; Henle, Klaus; Schuettler, Elke	Response of a small felid of conservation concern to habitat fragmentation	BIODIVERSITY AND CONSERVATION	2016	25	8	1447	1463	Chile	SA	39°24?S	71°30?W	Valdivian temperate forests	Temperate Broadleaf & Mixed Forests	Neotropic	no
646	Flezar, Ursa; le Roux, Elizabeth; Kerley, Graham I. H.; Kuijper, Dries P. J.; te Beest, Mariska; Druce, Dave J.; Prinsloo, Dominique; Cromsigt, Joris P. G. M.	Simulated elephant-induced habitat changes can create dynamic landscapes of fear	BIOLOGICAL CONSERVATION	2019	237		267	279	South Africa	Africa	-28.3	31.84	Limpopo lowveld	Tropical & Subtropical Grasslands, Savannas & Shrublands	Afrotropic	no
647	Flores-Morales, Minerva; Vazquez, Jorge; Bautista, Amando; Rodriguez-Martinez, Luisa; Monroy-Vilchis, Octavio	Response of two sympatric carnivores to human disturbances of their habitat: the bobcat and coyote	MAMMAL RESEARCH	2019	64	1	53	62	Mexico	NA	19° 06? 30? N	98° 09? 55? W	Trans-Mexican Volcanic Belt pine-oak forests	Tropical & Subtropical Coniferous Forests	Neotropic	no
648	Focardi, S.; Morimando, F.; Capriotti, S.; Ahmed, A.; Genov, P.	Cooperation improves the access of wild boars (Sus scrofa) to food sources	BEHAVIOURAL PROCESSES	2015	121		80	86	Bulgaria	Europe	41.77	24.85	Rodope montane mixed forests	Temperate Broadleaf & Mixed Forests	Palearctic	no
648	Focardi, S.; Morimando, F.; Capriotti, S.; Ahmed, A.; Genov, P.	Cooperation improves the access of wild boars (Sus scrofa) to food sources	BEHAVIOURAL PROCESSES	2015	121		80	86	Italy	Europe	43.2	11.2	Italian sclerophyllous and semi-deciduous forests	Mediterranean Forests, Woodlands & Scrub	Palearctic	no
649	Fonturbel, Francisco E.; Candia, Alina B.; Botto-Mahan, Carezza	Nocturnal activity patterns of the monito del monte (Dromiciops gliroides) in native and exotic habitats	JOURNAL OF MAMMALOGY	2014	95	6	1199	1206	Chile	SA	39°57?S	73°34?W	Valdivian temperate forests	Temperate Broadleaf & Mixed Forests	Neotropic	no
651	Foresman, KR; Pearson, DE	Comparison of proposed survey procedures for detection of forest carnivores	JOURNAL OF WILDLIFE MANAGEMENT	1998	62	4	1217	1226	USA	NA	46.11	-114.41	South Central Rockies forests	Temperate Conifer Forests	Nearctic	no
652	Fornitano, Larissa; Angeli, Thais; Costa, Romulo Theodoro; Olifiers, Natalie; Bianchi, Rita de Cassia	MEDIUM TO LARGE-SIZED MAMMALS OF THE AUGUSTO RUSCHI BIOLOGICAL RESERVE, SAO PAULO STATE, BRAZIL.	Oecologia Australis	2015	19		232	243	Brazil	SA	21º10’33”S	48º05’16”W	Cerrado	Tropical & Subtropical Grasslands, Savannas & Shrublands	Neotropic	no
653	Forrester, Tavis; O'Brien, Tim; Fegraus, Eric; Jansen, Patrick A.; Palmer, Jonathan; Kays, Roland; Ahumada, Jorge; Stern, Beth; McShea, William	An Open Standard for Camera Trap Data	BIODIVERSITY DATA JOURNAL	2016	4
654	Forrester, Tavis D.; Baker, Megan; Costello, Robert; Kays, Roland; Parsons, Arielle W.; McShea, William J.	Creating advocates for mammal conservation through citizen science	BIOLOGICAL CONSERVATION	2017	208		98	105	USA	NA	37.26	-79.6	Appalachian Piedmont forests	Temperate Broadleaf & Mixed Forests	Nearctic	no
654	Forrester, Tavis D.; Baker, Megan; Costello, Robert; Kays, Roland; Parsons, Arielle W.; McShea, William J.	Creating advocates for mammal conservation through citizen science	BIOLOGICAL CONSERVATION	2017	208		98	105	USA	NA	37.26	-79.6	Appalachian-Blue Ridge forests	Temperate Broadleaf & Mixed Forests	Nearctic
654	Forrester, Tavis D.; Baker, Megan; Costello, Robert; Kays, Roland; Parsons, Arielle W.; McShea, William J.	Creating advocates for mammal conservation through citizen science	BIOLOGICAL CONSERVATION	2017	208		98	105	USA	NA	37.26	-79.6	Appalachian mixed mesophytic forests	Temperate Broadleaf & Mixed Forests	Nearctic
655	Forsyth, David M.; Ramsey, David S. L.; Woodford, Luke P.	Estimating abundances, densities, and interspecific associations in a carnivore community	JOURNAL OF WILDLIFE MANAGEMENT	2019	83	5	1090	1102	Australia	Australia	-35.745	148.974	Eastern Australian temperate forests	Temperate Broadleaf & Mixed Forests	Australasia	no
656	Forsyth, David M.; Allen, Robert B.; Allen, Roy K. J.; Affeld, Kathrin; MacKenzie, Darryl I.	Soil phosphorus predicts feral pig (Sus scrofa) occupancy, detection probability and feeding activity in a temperate montane rainforest	WILDLIFE RESEARCH	2016	43	4	277	287	New Zealand	Zealandia	-38.3833	176.883	New Zealand North Island temperate forests	Temperate Broadleaf & Mixed Forests	Australasia	no
658	Foster, Rebecca J.; Harmsen, Bart J.; Doncaster, C. Patrick	Habitat Use by Sympatric Jaguars and Pumas Across a Gradient of Human Disturbance in Belize	BIOTROPICA	2010	42	6	724	731	Belize	NA	16.78	-88.46	Petén-Veracruz moist forests	Tropical & Subtropical Moist Broadleaf Forests	Neotropic	no
659	Foster, Vania C.; Sarmento, Pedro; Sollmann, Rahel; Torres, Natalia; Jacomo, Anah T. A.; Negroes, Nuno; Fonseca, Carlos; Silveira, Leandro	Jaguar and Puma Activity Patterns and Predator-Prey Interactions in Four Brazilian Biomes	BIOTROPICA	2013	45	3	373	379	Brazil	SA	-18.3331	-52.75	Cerrado	Tropical & Subtropical Grasslands, Savannas & Shrublands	Neotropic	no
660	Fournier, Gislene F. S. R.; Pinter, Adriano; Santiago, Renata; Munoz-Leal, Sebastian; Martins, Thiago Fernandes; Lopes, Marcos Gomes; McCoy, Karen D.; Toty, Celine; Horta, Mauricio C.; Labruna, Marcelo B.; Dias, Ricardo A.	A high gene flow in populations of Amblyomma ovale ticks found in distinct fragments of Brazilian Atlantic rainforest	EXPERIMENTAL AND APPLIED ACAROLOGY	2019	77	2	215	228	Brazil	SA	-23.79	-46.51	Serra do mar coastal forests	Tropical & Subtropical Moist Broadleaf Forests	Neotropic	yes
662	Francis, Ian; Smith, Claire B.	The use of trail cameras for the audio monitoring of birds and detection of Spotted Crakes	Scottish Birds	2015	35	2	126	128	UK	Europe	57.08	-2.94	Caledon conifer forests	Temperate Conifer Forests	Palearctic	no
663	Francis, Mitchell J.; Spooner, Peter G.; Matthews, Alison	The influence of urban encroachment on squirrel gliders (Petaurus norfolcensis): effects of road density, light and noise pollution	WILDLIFE RESEARCH	2015	42	4	324	333	Australia	Australia	-36.044	146.993	South Australia temperate forests	Temperate Broadleaf & Mixed Forests	Australasia	yes
664	Franco, Marcela; Quijano, Andrea; Soto-Gamboa, Mauricio	Communal nesting, activity patterns, and population characteristics in the near-threatened monito del monte, Dromiciops gliroides	JOURNAL OF MAMMALOGY	2011	92	5	994	1004	Chile	SA	39°41?S	73°18?W	Valdivian temperate forests	Temperate Broadleaf & Mixed Forests	Neotropic	no
666	Frentzel, Dylan J	Photographic evidence of the white-tailed deer	SOUTHWESTERN NATURALIST	2020	64	2	140	142	USA	NA	35.09	-106.42	Arizona Mountains forests	Temperate Conifer Forests	Nearctic	no
668	Frigeri, Enrico; Cassano, Camila Righetto; Pardini, Renata	Domestic dog invasion in an agroforestry mosaic in southern Bahia, Brazil	TROPICAL CONSERVATION SCIENCE	2014	7	3	508	528	Brazil	SA	-15.3	-39.07	Bahia coastal forest	Tropical & Subtropical Moist Broadleaf Forests	Neotropic	yes
669	Froese, Graden Z. L.; Contasti, Adrienne L.; Mustari, Abdul Haris; Brodie, Jedediah F.	Disturbance impacts on large rain-forest vertebrates differ with edge type and regional context in Sulawesi, Indonesia	JOURNAL OF TROPICAL ECOLOGY	2015	31		509	517	Indonesia	Asia	122º33?E	4º21?S	Sulawesi lowland rain forests	Tropical & Subtropical Moist Broadleaf Forests	Australasia	no
670	Fuda, Rebecca; Ryan, Sadie; Cohen, Jonathan; Hartter, Joel; Frair, Jacqueline	Assessing the impacts of oil exploration and restoration on mammals in Murchison Falls Conservation Area, Uganda	AFRICAN JOURNAL OF ECOLOGY	2018	56	4	804	817	Uganda	Africa	2.37	31.53	East Sudanian savanna	Tropical & Subtropical Grasslands, Savannas & Shrublands	Afrotropic	no
671	Fukasawa, Keita; Mishima, Yoshio; Yoshioka, Akira; Kumada, Nao; Totsu, Kumiko; Osawa, Takeshi	Mammal assemblages recorded by camera traps inside and outside the evacuation zone of the Fukushima Daiichi Nuclear Power Plant accident (vol 31, pg 493, 2016)	ECOLOGICAL RESEARCH	2016	31	5	757	757	Japan	Asia	37.42	141.03	Taiheiyo evergreen forests	Temperate Broadleaf & Mixed Forests	Palearctic	yes
672	Fukuda, Shinpei; Konuma, Junji	Using three-dimensional printed models to test for aposematism in a carabid beetle	BIOLOGICAL JOURNAL OF THE LINNEAN SOCIETY	2019	128	3	735	741	Japan	Asia	38.12	140.79	Taiheiyo montane deciduous forests	Temperate Broadleaf & Mixed Forests	Palearctic	no
672	Fukuda, Shinpei; Konuma, Junji	Using three-dimensional printed models to test for aposematism in a carabid beetle	BIOLOGICAL JOURNAL OF THE LINNEAN SOCIETY	2019	128	3	735	741	Japan	Asia	38.12	140.79	Nihonkai montane forests	Temperate Broadleaf & Mixed Forests	Palearctic
672	Fukuda, Shinpei; Konuma, Junji	Using three-dimensional printed models to test for aposematism in a carabid beetle	BIOLOGICAL JOURNAL OF THE LINNEAN SOCIETY	2019	128	3	735	741	Japan	Asia	38.12	140.79	Taiheiyo evergreen forests	Temperate Broadleaf & Mixed Forests	Palearctic
673	Fuller, Angela K.; Linden, Daniel W.; Royle, J. Andrew	Management Decision Making for Fisher Populations Informed by Occupancy Modeling	JOURNAL OF WILDLIFE MANAGEMENT	2016	80	5	794	802	USA	NA	43.13	-75.06	New England-Acadian forests	Temperate Broadleaf & Mixed Forests	Nearctic	no
673	Fuller, Angela K.; Linden, Daniel W.; Royle, J. Andrew	Management Decision Making for Fisher Populations Informed by Occupancy Modeling	JOURNAL OF WILDLIFE MANAGEMENT	2016	80	5	794	802	USA	NA	43.13	-75.06	Eastern Great Lakes lowland forests	Temperate Broadleaf & Mixed Forests	Nearctic
673	Fuller, Angela K.; Linden, Daniel W.; Royle, J. Andrew	Management Decision Making for Fisher Populations Informed by Occupancy Modeling	JOURNAL OF WILDLIFE MANAGEMENT	2016	80	5	794	802	USA	NA	43.13	-75.06	Allegheny Highlands forests	Temperate Broadleaf & Mixed Forests	Nearctic
674	Fuller, TK; York, EC; Powell, SM; Decker, TA; DeGraaf, RM	An evaluation of territory mapping to estimate fisher density	CANADIAN JOURNAL OF ZOOLOGY-REVUE CANADIENNE DE ZOOLOGIE	2001	79	9	1691	1696	USA	NA	42.64	-72.18	New England-Acadian forests	Temperate Broadleaf & Mixed Forests	Nearctic	no
675	Fulton, Graham R.	Identification of nest predators with remote cameras and artificial nests in extensive old-growth woodland of southwestern Australia	Corella	2006	30	2	35	39	Australia	Australia	-32.79	116.97	Southwest Australia woodlands	Mediterranean Forests, Woodlands & Scrub	Australasia	no
676	Fusco-Costa, Roberto; Ingberman, Bianca	Records of the bush dog Speothos venaticus in a continuous remnant of coastal Atlantic Forest in southern Brazil	ORYX	2013	47	1	105	108	Brazil	SA	-25.37	-48.51	Serra do Mar coastal forests	Tropical & Subtropical Moist Broadleaf Forests	Neotropic	no
677	Fusco-Costa, Roberto; Ingberman, Bianca; Zarate do Couto, Hilton Thadeu; Nakano-Oliveira, Eduardo; de Araujo Monteiro-Filho, Emygdio Leite	Population density of a coastal island population of the ocelot in Atlantic Forest, southeastern Brazil	MAMMALIAN BIOLOGY	2010	75	4	358	362	Brazil	SA	-25.1708	-48.0014	Serra do Mar coastal forests	Tropical & Subtropical Moist Broadleaf Forests	Neotropic	no
678	Gabel, Wray; Frederick, Peter; Zabala, Jabi	Nestling carcasses from colonially breeding wading birds: patterns of access and energetic relevance for a vertebrate scavenger community	SCIENTIFIC REPORTS	2019	9				USA	NA	26	-80.67	Everglades Flooded grasslands	Flooded Grasslands & Savannas	Neotropic	no
679	Gabriel Escobar-Flores, Jonathan; Sandoval, Sarahi; Valdez, Raul; Shahriary, Eahsan; Torres, Jorge; Alvarez-Cardenas, Sergio; Gallina-Tessaro, Patricia	Waterhole detection using a vegetation index in desert bighorn sheep (Ovis canadensis cremnobates) habitat	PLOS ONE	2019	14	1			Mexico	NA	30	-115	Baja California desert	Deserts & Xeric Shrublands	Nearctic	no
680	Galase, Nicole K.	FIRST CONFIRMED BAND-RUMPED STORM PETREL OCEANODROMA CASTRO COLONY IN THE HAWAIIAN ISLANDS	MARINE ORNITHOLOGY	2019	47	1	25	28	USA	NA	19.6333	-155.533	Hawai'I tropical high shrublands	Tropical & Subtropical Grasslands, Savannas & Shrublands	Oceania	no
681	Galbraith, Josie A.; Jones, Darryl N.; Beggs, Jacqueline R.; Parry, Katharina; Stanley, Margaret C.	Urban Bird Feeders Dominated by a Few Species and Individuals	FRONTIERS IN ECOLOGY AND EVOLUTION	2017	5				New Zealnd	Zealandia	-36.87	174.81	Northland temperate kauri forests	Temperate Broadleaf & Mixed Forests	Australasia	yes
683	Galetti, Mauro; Camargo, Hileia; Siqueira, Tadeu; Keuroghlian, Alexine; Donatti, Camila I.; Jorge, Maria Luisa S. P.; Pedrosa, Felipe; Kanda, Claudia Z.; Ribeiro, Milton C.	Diet Overlap and Foraging Activity between Feral Pigs and Native Peccaries in the Pantanal	PLOS ONE	2015	10	11			Brazil	SA	-19.69	-55.79	Pantanal	Flooded Grasslands & Savannas	Neotropic	no
684	Galetti, Mauro; Bovendorp, Ricardo S.; Guevara, Roger	Defaunation of large mammals leads to an increase in seed predation in the Atlantic forests	GLOBAL ECOLOGY AND CONSERVATION	2015	3		824	830	Brazil	SA	24°44?S	47°44?W	Serra do Mar coastal forests	Tropical & Subtropical Moist Broadleaf Forests	Neotropic	no
684	Galetti, Mauro; Bovendorp, Ricardo S.; Guevara, Roger	Defaunation of large mammals leads to an increase in seed predation in the Atlantic forests	GLOBAL ECOLOGY AND CONSERVATION	2015	3		824	830	Brazil	SA	24°44?S	47°44?W	Southern Atlantic Brazilian mangroves	Mangroves	Neotropic
684	Galetti, Mauro; Bovendorp, Ricardo S.; Guevara, Roger	Defaunation of large mammals leads to an increase in seed predation in the Atlantic forests	GLOBAL ECOLOGY AND CONSERVATION	2015	3		824	830	Brazil	SA	24°44?S	47°44?W	Alto Paraná Atlantic forests	Tropical & Subtropical Moist Broadleaf Forests	Neotropic
685	Galetti, Mauro; Bovendorp, Ricardo S.; Fadini, Rodrigo F.; Gussoni, Carlos O. A.; Rodrigues, Marcos; Alvarez, Ariane D.; Guimaraes, Paulo R., Jr.; Alves, Kaiser	Hyper abundant mesopredators and bird extinction in an Atlantic forest island	ZOOLOGIA	2009	26	2	288	298	Brazil	SA	45º02'W	23º27'S	Serra do Mar coastal forests	Tropical & Subtropical Moist Broadleaf Forests	Neotropic	no
686	Gallo, Travis; Fidino, Mason; Lehrer, Elizabeth W.; Magle, Seth	Urbanization alters predator-avoidance behaviours	JOURNAL OF ANIMAL ECOLOGY	2019	88	5	793	803	USA	NA	41.84	-87.92	Central US forest-grasslands transition	Temperate Grasslands, Savannas & Shrublands	Nearctic	yes
687	Gallo, Travis; Fidino, Mason; Lehrer, Elizabeth W.; Magle, Seth B.	Mammal diversity and metacommunity dynamics in urban green spaces: implications for urban wildlife conservation	ECOLOGICAL APPLICATIONS	2017	27	8	2330	2341	USA	NA	41.84	-87.92	Central US forest-grasslands transition	Temperate Grasslands, Savannas & Shrublands	Nearctic	yes
688	Gallo, Travis; Stinson, Lani T.; Pejchar, Liba	Pinyon-juniper removal has long-term effects on mammals	FOREST ECOLOGY AND MANAGEMENT	2016	377		93	100	USA	NA	39.5	-108.39	Colorado Plateau shrublands	Deserts & Xeric Shrublands	Nearctic	no
689	Galvao, Camila Andre; Francisco, Mercival Roberto; Schlindwein, Marcelo Nivert	Agroforestry system as a buffer zone in a Brazilian Atlantic Forest conservation unit: an artificial nest predation perspective	BIOTA NEOTROPICA	2018	18	1			Brazil	SA	24º06’55”S	47º47’18”W	Serra do Mar coastal forests	Tropical & Subtropical Moist Broadleaf Forests	Neotropic	no
690	Galvez, Nicolas; Guillera-Arroita, Gurutzeta; St John, Freya A. V.; Schuettler, Elke; Macdonald, David W.; Davies, Zoe G.	A spatially integrated framework for assessing socioecological drivers of carnivore decline	JOURNAL OF APPLIED ECOLOGY	2018	55	3	1393	1405	Chile	SA	-40	-72	Valdivian temperate forests	Temperate Broadleaf & Mixed Forests	Neotropic	yes
691	Galvez, Nicolas; Guillera-Arroita, Gurutzeta; Morgan, Byron J. T.; Davies, Zoe G.	Cost-efficient effort allocation for camera-trap occupancy surveys of mammals	BIOLOGICAL CONSERVATION	2016	204		350	359	Chile	SA	39°15?S	71°48?W	Valdivian temperate forests	Temperate Broadleaf & Mixed Forests	Neotropic	yes
692	Galvez, Nicolas; Hernandez, Felipe; Laker, Jerry; Gilabert, Horacio; Petitpas, Robert; Bonacic, Cristian; Gimona, Alessandro; Hester, Alison; Macdonald, David W.	Forest cover outside protected areas plays an important role in the conservation of the Vulnerable guina Leopardus guigna	ORYX	2013	47	2	251	258	Chile	SA	-39.27	-71.95	Valdivian temperate forests	Temperate Broadleaf & Mixed Forests	Neotropic	no
693	Galvis, Nelson; Link, Andres; Di Fiore, Anthony	A Novel Use of Camera Traps to Study Demography and Life History in Wild Animals: A Case Study of Spider Monkeys (Ateles belzebuth)	INTERNATIONAL JOURNAL OF PRIMATOLOGY	2014	35	5	908	918	Ecuador	SA	-0.638	-76.1497	Napo moist forests	Tropical & Subtropical Moist Broadleaf Forests	Neotropic	no
694	Gangadharan, A.; Vaidyanathan, S.; St Clair, C. C.	Categorizing species by niche characteristics can clarifyconservation planning in rapidly-developing landscapes	ANIMAL CONSERVATION	2016	19	5	451	461	India	Asia	9	-77	South Western Ghats montane rain forests	Tropical & Subtropical Moist Broadleaf Forests	Indomalayan	yes
695	Gantchoff, Mariela G.; Belant, Jerrold L.; Masson, Diego A.	Occurrence of invasive mammals in southern Nahuel Huapi National Park	STUDIES ON NEOTROPICAL FAUNA AND ENVIRONMENT	2013	48	3	175	182	Argentina	SA	-40.99	-71.51	Valdivian temperate forests	Temperate Broadleaf & Mixed Forests	Neotropic	no
696	Garcia-Anleu, Rony; Ponce-Santizo, Gabriela; Balas Mcnab, Roan; Polisar, John; Noss, Andrew; Moreira, Jose; Ruano, Gustavo	The queen of Tikal and her suitors.	Cat News	2015	62		42	43	Guatamala	NA	17.22	-89.62	Petén-Veracruz moist forests	Tropical & Subtropical Moist Broadleaf Forests	Neotropic	no
697	Garcia-Salgado, Gonzalo; Rebollo, Salvador; Perez-Camacho, Lorenzo; Martinez-Hesterkamp, Sara; Navarro, Alberto; Fernandez-Pereira, Jose-Manuel	Evaluation of Trail-Cameras for Analyzing the Diet of Nesting Raptors Using the Northern Goshawk as a Model	PLOS ONE	2015	10	5			Spain	Europe	42.33	-8.73	Cantabrian mixed forests	Temperate Broadleaf & Mixed Forests	Palearctic	no
698	Gardner, Beth; Sollmann, Rahel; Kumar, N. Samba; Jathanna, Devcharan; Karanth, K. Ullas	State space and movement specification in open population spatial capture-recapture models	ECOLOGY AND EVOLUTION	2018	8	20	10336	10344	India	Asia	12.03	76.12	South Western Ghats montane rain forests	Tropical & Subtropical Moist Broadleaf Forests	Indomalayan	no
699	Gardner, Beth; Reppucci, Juan; Lucherini, Mauro; Royle, J. Andrew	Spatially explicit inference for open populations: estimating demographic parameters from camera-trap studies	ECOLOGY	2010	91	11	3376	3383	Argentina	SA	22° 30''S	66° 30''W	Central Andean puna	Montane Grasslands & Shrublands	Neotropic	no
700	Garrison, BA; Wachs, RL; Giles, TA; Triggs, ML	A mounting technique for Trailmaster camera systems to monitor deer	TRANSACTIONS OF THE WESTERN SECTION OF THE WILDLIFE SOCIETY, VOL 35, 1999	1999			50	56	USA	NA	39.02	-120.75	Sierra Nevada forests	Temperate Conifer Forests	Nearctic	no
701	Garrote, German; Maria Gil-Sanchez, Jose; McCain, Emil B.; de Lillo, Santiago; Luis Telleria, Jose; Angel Simon, Miguel	The effect of attractant lures in camera trapping: a case study of population estimates for the Iberian lynx (Lynx pardinus)	EUROPEAN JOURNAL OF WILDLIFE RESEARCH	2012	58	5	881	884	Spain	Europe	38.29	-4.03	Iberian sclerophyllous and semi-deciduous forests	Mediterranean Forests, Woodlands & Scrub	Palearctic	no
702	Garvey, Patrick M.; Glen, Alistair S.; Clout, Mick N.; Wyse, Sarah V.; Nichols, Margaret; Pech, Roger P.	Exploiting interspecific olfactory communication to monitor predators	ECOLOGICAL APPLICATIONS	2017	27	2	389	402	New Zealand	Zealandia	-39.1667	176.767	New Zealand North Island temperate forests	Temperate Broadleaf & Mixed Forests	Australasia	no
703	Gaston, Anthony J.; Pelletier, Mia; Eberl, Christine; Mallory, Mark L.	Incubation shifts of northern fulmars Fulmarus glacialis in the Canadian high Arctic determined by digital photography	POLAR BIOLOGY	2014	37	2	261	267	Canada	NA	74.04	-90.03	Canadian High Arctic tundra	Tundra	Nearctic	no
704	Gauthier, M.	Data summary of trap camera video obtained during Sablefish bottom longline trap fishing at SGaan Kinghlas - Bowie Seamount, 2016.	Canadian Data Report of Fisheries and Aquatic Sciences	2017	1279		i	iii, 4-21	Canada	NA			Ocean	Ocean	Nearctic	no
705	Gaynor, Kaitlyn; Branco, Paola; Long, Ryan; Goncalves, Dominique; Granli, Petter; Poole, Joyce	Effects of human settlement and roads on diel activity patterns of elephants (Loxodonta africana)	AFRICAN JOURNAL OF ECOLOGY	2018	56	4	872	881	Mozambique	Africa	-18.85	34.49	Zambezian-Limpopo mixed woodlands	Tropical & Subtropical Grasslands, Savannas & Shrublands	Afrotropic	no
706	Gebert, Friederike; Steffan-Dewenter, Ingolf; Moretto, Philippe; Peters, Marcell K.	Climate rather than dung resources predict dung beetle abundance and diversity along elevational and land use gradients on Mt. Kilimanjaro	JOURNAL OF BIOGEOGRAPHY	2020	47	2	371	381	Tanzania	Africa	3°25?S	37°43?E	East African montane forests	Tropical & Subtropical Moist Broadleaf Forests	Afrotropic	yes
706	Gebert, Friederike; Steffan-Dewenter, Ingolf; Moretto, Philippe; Peters, Marcell K.	Climate rather than dung resources predict dung beetle abundance and diversity along elevational and land use gradients on Mt. Kilimanjaro	JOURNAL OF BIOGEOGRAPHY	2020	47	2	371	381	Tanzania	Africa	3°25?S	37°43?E	East African montane moorlands	Montane Grasslands & Shrublands	Afrotropic
706	Gebert, Friederike; Steffan-Dewenter, Ingolf; Moretto, Philippe; Peters, Marcell K.	Climate rather than dung resources predict dung beetle abundance and diversity along elevational and land use gradients on Mt. Kilimanjaro	JOURNAL OF BIOGEOGRAPHY	2020	47	2	371	381	Tanzania	Africa	3°25?S	37°43?E	Southern Acacia-Commiphora bushlands and thickets	Tropical & Subtropical Grasslands, Savannas & Shrublands	Afrotropic
707	Geiger, Madeleine; Taucher, Anouk Lisa; Gloor, Sandra; Hegglin, Daniel; Bontadina, Fabio	In the footsteps of city foxes: evidence for a rise of urban badger populations in Switzerland	HYSTRIX-ITALIAN JOURNAL OF MAMMALOGY	2018	29	2	236	238	Switzerland	Europe	47.39	8.54	Western European broadleaf forests	Temperate Broadleaf & Mixed Forests	Palearctic	yes
709	Geller, Gregory A.	Notes on the Nest Predation Dynamics of Graptemys at Two Wisconsin Sites Using Trail Camera Monitoring	CHELONIAN CONSERVATION AND BIOLOGY	2012	11	2	197	205	USA	NA	43.16	-90.2	Upper Midwest US forest-savanna transition	Temperate Broadleaf & Mixed Forests	Nearctic	no
710	Geller, Gregory A.	Notes on the Nesting Ecology of Ouachita Map Turtles (Graptemys ouachitensis) at Two Wisconsin Sites Using Trail Camera Monitoring	CHELONIAN CONSERVATION AND BIOLOGY	2012	11	2	206	213
711	Gemita, Elva; Hall, Amy Louise; Maddox, Tom	The Asian tapir in Jambi lowland forest and commercial landscape.	Tapir Conservation	2007	16	1	30	34	Indonesia	Asia	-2.22	103.4	Sumatran lowland rain forests	Tropical & Subtropical Moist Broadleaf Forests	Indomalayan	yes
712	Gentle, Matthew; Speed, James; Pople, Anthony	Impacts on nontarget avian species from aerial meat baiting for feral pigs	ECOLOGICAL MANAGEMENT & RESTORATION	2014	15	3	222	230	Australia	Australia	28°55?20?S	146°59?17?E	Southeast Australia temperate savanna	Temperate Grasslands, Savannas & Shrublands	Australasia	no
713	Georgian, Elizabeth; Fang, Zhendong; Emshwiller, Eve; Pidgeon, Anna	THE POLLINATION ECOLOGY OF RHODODENDRON FLOCCIGERUM FRANCHET (ERICACEAE) IN WEIXI, YUNNAN PROVINCE, CHINA.	Journal of Pollination Ecology	2015	16		72	81	China	Asia	27°09’39.474” N	99°15’59.339” E	Nujiang Langcang Gorge alpine conifer and mixed forests	Temperate Conifer Forests	Palearctic	no
714	Gerber, Brian; Karpanty, Sarah M.; Crawford, Charles; Kotschwar, Mary; Randianantenaina, Johnny	An assessment of carnivore relative abundance and density in the eastern rainforests of Madagascar using remotely-triggered camera traps	ORYX	2010	44	2	219	222	Madagascar	Africa	-21.26	47.46	Madagascar humid forests	Tropical & Subtropical Moist Broadleaf Forests	Afrotropic	no
715	Gerber, Brian D.; Williams, Perry J.; Bailey, Larissa L.	Primates and Cameras	INTERNATIONAL JOURNAL OF PRIMATOLOGY	2014	35	5	841	858
716	Gerber, Brian D.; Ivan, Jacob S.; Burnham, Kenneth P.	Estimating the abundance of rare and elusive carnivores from photographic-sampling data when the population size is very small	POPULATION ECOLOGY	2014	56	3	463	470
717	Gerber, Brian D.; Karpanty, Sarah M.; Kelly, Marcella J.	Evaluating the potential biases in carnivore capture-recapture studies associated with the use of lure and varying density estimation techniques using photographic-sampling data of the Malagasy civet	POPULATION ECOLOGY	2012	54	1	43	54	Madagascar	Africa	-21.26	47.45	Madagascar humid forests	Tropical & Subtropical Moist Broadleaf Forests	Afrotropic	no
719	Ghadirian, Taher; Ghasemi, Maysam	New records of Persian leopard in Bashagard area, southeastern Iran.	Cat News	2012	56		32	32	Iran	Asia	26.4	57.88	South Iran Nubo-Sindian desert and semi-desert	Deserts & Xeric Shrublands	Palearctic	no
720	Ghadirian, Taher; Ghoddousi, Arash; Abolghasemi, Hamed; Riazifar, Abdolvahid; Nekoei, Gholamreza; Dehghani, Mohsen	First Camera-trap Photos of Asiatic Black Bears in the Bashagard Region of Southeastern Iran.	International Bear News	2012	21	1	15	17	Iran	Asia	26.4	57.88	South Iran Nubo-Sindian desert and semi-desert	Deserts & Xeric Shrublands	Palearctic	no
722	Ghimirey, Y.; Acharya, R.	The Vulnerable clouded leopard Neofelis nebulosa in Nepal: an update	ORYX	2018	52	1	166	170	Nepal	Asia	28.12	85.54	Eastern Himalayan alpine shrub and meadows	Montane Grasslands & Shrublands	Palearctic	no
723	Ghimirey, Yadav; Yadav, Kaushal; Rai, Jeevan; Baral, Rishi; Acharya, Raju	Clouded leopard in Sikles-Bhujung Landscape, Annapurna Conservation Area, Nepal.	Cat News	2018	68		13	15	Nepal	Asia	28.15	84.22	Himalayan subtropical pine forests	Tropical & Subtropical Coniferous Forests	Indomalayan	no
724	Ghimirey, Yadav; Yadav, Kaushal; Rai, Jeevan; Prasai, Raj; Rana, Prabal; Acharya, Raju	First verifiable record of Spotted Linsang Prionodon pardicolor from Nepal since the nineteenth century	Small Carnivore Conservation	2018	56		48	53	Nepal	Asia	28.33	83.88	Himalayan subtropical pine forests	Tropical & Subtropical Coniferous Forests	Indomalayan	no
725	Ghimirey, Yadav; Pal, Prabhat	First camera trap image of Asiatic golden cat in Nepal.	Cat News	2009	51		19	19	Nepal	Asia	27°35.336’N	87°07.568’E	Eastern Himalayan subalpine conifer forests	Temperate Conifer Forests	Indomalayan	no
726	Ghoddousi, A.; Hamidi, A. Kh; Soofi, M.; Khorozyan, I.; Kiabi, B. H.; Waltert, M.	Effects of ranger stations on predator and prey distribution and abundance in an Iranian steppe landscape	ANIMAL CONSERVATION	2016	19	3	273	280	Iran	Asia	37.53	56.37	Elburz Range forest steppe	Temperate Conifer Forests	Palearctic	no
727	Ghose, M.; Sharma, D.; Murali, N.S.	First record of Yellow-bellied Weasel (Mustela kathiah) from Buxa Tiger Reserve, West Bengal, India.	NeBIO	2018	9	2	212	214	India	Asia	26.7701	89.5774	Terai-Duar savanna and grasslands	Tropical & Subtropical Grasslands, Savannas & Shrublands	Indomalayan	no
728	Ghose, Mayukh; Sharma, Deepak; Murali, Nandavaram Subbarao	FIRST PHOTOGRAPHIC EVIDENCE OF POLYMORPHIC ASIATIC GOLDEN CAT CATOPUMA TEMMINCKII VIGORS & HORSFIELD, 1827 (MAMMALIA: CARNIVORA: FELIDAE) IN BUXA TIGER RESERVE, WEST BENGAL, INDIA	Journal of Threatened Taxa	2019	11	4	13502	13505	India	Asia	26.781	89.611	Terai-Duar savanna and grasslands	Tropical & Subtropical Grasslands, Savannas & Shrublands	Indomalayan	no
729	Ghose, Partha S.; Sharma, Basant K.; Theengh, Lak Tsheden; Shrestha, Priyadarshinee; Pintso, Tsering	Records of Spotted Linsang Prionodon pardicolor from Barsey Rhododendron Sanctuary, Sikkim, India	Small Carnivore Conservation	2012	47		67	68	India	Asia	27.2097	88.0742	Eastern Himalayan broadleaf forests	Temperate Broadleaf & Mixed Forests	Indomalayan	no
730	Gibbon, Gwili E. M.; Bindemann, Markus; Roberts, David L.	Factors affecting the identification of individual mountain bongo antelope	PEERJ	2015	3
732	Gil-Sanchez, Jose Maria; Moral, Manuel; Bueno, Jose; Rodriguez-Siles, Javier; Lillo, Santiago; Perez, Joaquin; Manuel Martin, Jose; Valenzuela, Gerardo; Garrote, German; Torralba, Bernado; Angel Simon-Mata, Miguel	The use of camera trapping for estimating Iberian lynx (Lynx pardinus) home ranges	EUROPEAN JOURNAL OF WILDLIFE RESEARCH	2011	57	6	1203	1211	Spain	Europe	38.47	-3.23	Iberian scleophyllous and semi-deciduous forests	Mediterranean Forests, Woodlands & Scrub	Palearctic	no
733	Gillen, Carolyn A.; Hellgren, Eric C.	Effects of forest composition on trophic relationships among mast production and mammals in central hardwood forest	JOURNAL OF MAMMALOGY	2013	94	2	417	426	USA	NA	37°30?N	89°22?W	Interior Plateau US Hardwood Forests	Temperate Broadleaf & Mixed Forests	Nearctic	no
734	Gillies, Craig; Brady, Matthew	Trialling monitoring methods for feral cats, ferrets and rodents in the Whangamarino wetland	NEW ZEALAND JOURNAL OF ZOOLOGY	2018	45	3	192	212	New Zealand	Zealandia	37°18?S	175°07?E	Northern temperate kauri forest	Temperate Broadleaf & Mixed Forests	Australasia	no
735	Giordano, A. J.; Brodie, J. F.	An observation of Malay Weasel Mustela nudipes in Gunung Mulu National Park (Sarawak, Malaysia) with a comment on discriminating this species from sympatric orange mongooses Herpestes	Small Carnivore Conservation	2012	47		71	72	Borneo	Asia	4°11'53"N	114°55'55"E	Borneo montane rain forests	Tropical & Subtropical Moist Broadleaf Forests	Indomalayan	no
737	Giraldo-Zuluaga, Jhony-Heriberto; Salazar, Augusto; Gomez, Alexander; Diaz-Pulido, Angelica	Camera-trap images segmentation using multi-layer robust principal component analysis	VISUAL COMPUTER	2019	35	3	335	347	Colombia	SA
738	Githiru, Mwangi; Kasaine, Simon; Mdamu, Dephence M.; Amakobe, Bernard	Recent records and conservation issues affecting the African wild dog in the Kasigau Corridor, south-east Kenya.	Canid News	2014	17	1	1	8	Kenya	Africa	-3.74083	38.7334	Northern Acacia-Commiphora bushlands and thickets	Tropical & Subtropical Grasslands, Savannas & Shrublands	Afrotropic	no
739	Gledhill, CT; LyczkowskiShultz, J; Rademacher, K; Kargard, E; Crist, G; Grace, MA	Evaluation of video and acoustic index methods for assessing reef-fish populations	ICES JOURNAL OF MARINE SCIENCE	1996	53	2	483	485	USA	NA			Ocean (Gulf of Mexico)			no
740	Glen, A. S.; Anderson, D.; Veltman, C. J.; Garvey, P. M.; Nichols, M.	Wildlife detector dogs and camera traps: a comparison of techniques for detecting feral cats	NEW ZEALAND JOURNAL OF ZOOLOGY	2016	43	2	127	137	New Zealand	Zealandia	-39.11	177.24	New Zealand North Island temperate forests	Temperate Broadleaf & Mixed Forests	Australasia	yes
741	Glen, A. S.; Warburton, B.; Cruz, J.; Coleman, M.	Comparison of camera traps and kill traps for detecting mammalian predators: a field trial	NEW ZEALAND JOURNAL OF ZOOLOGY	2014	41	3	155	160			45°25?S	170°28?E	Canterbury-Otago tussock grasslands	Temperate Grasslands, Savannas & Shrublands	Australasia	yes
741	Glen, A. S.; Warburton, B.; Cruz, J.; Coleman, M.	Comparison of camera traps and kill traps for detecting mammalian predators: a field trial	NEW ZEALAND JOURNAL OF ZOOLOGY	2014	41	3	155	160			43°50?S	170°8?E	New Zealand South Island montane grasslands	Montane Grasslands & Shrublands	Australasia	no
742	Glen, Alistair S.; Cockburn, Stuart; Nichols, Margaret; Ekanayake, Jagath; Warburton, Bruce	Optimising Camera Traps for Monitoring Small Mammals	PLOS ONE	2013	8	6			New Zealand	Zealandia
745	Glover-Kapfer, Paul; Soto-Navarro, Carolina A.; Wearn, Oliver R.	Camera-trapping version 3.0: current constraints and future priorities for development	REMOTE SENSING IN ECOLOGY AND CONSERVATION	2019	5	3	209	223
746	Gnocchi, Ariana Pignaton; Srbek-Araujo, Ana Carolina	Common Vampire Bat (Desmodus rotundus) feeding on Lowland Tapir (Tapirus terrestris) in an Atlantic Forest remnant in southeastern Brazil	BIOTA NEOTROPICA	2017	17	3			Brazil	SA	19º55’ S	40º15’W	Bahia coastal forests	Tropical & Subtropical Moist Broadleaf Forests	Neotropic	no
747	Goad, Erica H.; Pejchar, Liba; Reed, Sarah E.; Knight, Richard L.	Habitat use by mammals varies along an exurban development gradient in northern Colorado	BIOLOGICAL CONSERVATION	2014	176		172	182	USA	NA	40°50?N	105°15?W	Colorado Rockies forests	Temperate Conifer Forests	Nearctic	no
748	Gobush, Kathleen S.; Farry, Shawn C.	Non-lethal efforts to deter shark predation of Hawaiian monk seal pups	AQUATIC CONSERVATION-MARINE AND FRESHWATER ECOSYSTEMS	2012	22	6	751	761	USA	NA	N23° 45?	W166° 10?	Ocean			no
749	Godoy-Guinao, Javier; Diaz, Ivan A.; Celis-Diez, Juan L.	Confirmation of arboreal habits in Dromiciops gliroides: a key role in Chilean Temperate Rainforests	ECOSPHERE	2018	9	10			Chile	SA	39°25? S	71°45? W	Valdivian temperate forests	Temperate Broadleaf & Mixed Forests	Neotropic	no
752	Goldberg, Joshua F.; Tempa, Tshering; Norbu, Nawang; Hebblewhite, Mark; Mills, L. Scott; Wangchuk, Tshewang R.; Lukacs, Paul	Examining Temporal Sample Scale and Model Choice with Spatial Capture-Recapture Models in the Common Leopard Panthera pardus	PLOS ONE	2015	10	11			Bhutan	Asia	26° 47’31.27” N	90° 57’37.61” E	Himalayan subtropical broadleaf forests	Tropical & Subtropical Moist Broadleaf Forests	Indomalayan	no
753	Goldingay, Ross L.; Rohweder, David; Taylor, Brendan D.	Will arboreal mammals use rope-bridges across a highway in eastern Australia?	AUSTRALIAN MAMMALOGY	2013	35	1	30	38	Australia	Australia	-27.64	153.08	Eastern Australian temperate forests	Temperate Broadleaf & Mixed Forests	Australasia	yes
754	Goldingay, Ross L.; Taylor, Brendan D.; Ball, Tina	Wooden poles can provide habitat connectivity for a gliding mammal	Australian Mammalogy	2011	33	1	36	43	Australia	Australia	-32.6333	151.917	Eastern Australian temperate forests	Temperate Broadleaf & Mixed Forests	Australasia	yes
755	Gomer, Joshua A.; Dash, Coleman H.; Moore, Kristin S.; Pagano, Christopher C.	Using Radial Outflow to Provide Depth Information During Teleoperation	PRESENCE-TELEOPERATORS AND VIRTUAL ENVIRONMENTS	2009	18	4	304	320
756	Gomez Villa, Alexander; Salazar, Augusto; Vargas, Francisco	Towards automatic wild animal monitoring: Identification of animal species in camera-trap images using very deep convolutional neural networks	ECOLOGICAL INFORMATICS	2017	41		24	32
757	Gomo, Gjermund; Mattisson, Jenny; Hagen, Bjorn Roar; Moa, Pal Fossland; Willebrand, Tomas	Scavenging on a pulsed resource: quality matters for corvids but density for mammals	BMC ECOLOGY	2017	17				Norway	Europe	63.95 N	11.76 E	Scandanavia and Russian taiga	Boreal Forests/Taiga	Palearctic	yes
758	Gonthier, David J.; Castaneda, Franklin E.	Large- and medium-sized mammal survey using camera traps in the Sikre River in the Rio Platano Biosphere Reserve, Honduras	TROPICAL CONSERVATION SCIENCE	2013	6	4	584	591	Honduras	SA	15.4	-84.63	Central American Atlantic moist forests	Tropical & Subtropical Moist Broadleaf Forests	Neotropic	no
758	Gonthier, David J.; Castaneda, Franklin E.	Large- and medium-sized mammal survey using camera traps in the Sikre River in the Rio Platano Biosphere Reserve, Honduras	TROPICAL CONSERVATION SCIENCE	2013	6	4	584	591	Honduras	SA	15.4	-84.63	Miskito pine forests	Tropical & Subtropical Grasslands, Savannas & Shrublands	Neotropic
759	Gonzalez, CAL; Pina, GL	Carrion use by jaguars (Panthera onca) in Sonora, Mexico	MAMMALIA	2002	66	4	603	605	Mexico	NA	29.3811	-109.148	Sierra Madre Occidental pine-oak forests	Tropical & Subtropical Coniferous Forests	Nearctic	no
760	Gonzalez-Maya, Jose F.; Gomez-Hoyos, Diego A.; Schipper, Jan	First confirmed records of the bush dog (Carnivora: Canidae) for Costa Rica.	Neotropical Biology and Conservation	2017	12	3	238	241	Costa Rica	NA	8.96124	-82.8708	Isthmian-Pacific moist forests	Tropical & Subtropical Moist Broadleaf Forests	Neotropic	no
761	Gonzalez-Maya, Jose F.; Schipper, Jan; Polidoro, Beth; Hoepker, Annelie; Zarrate--Charry, Diego; Belant, Jerrold L.	Baird's tapir density in high elevation forests of the Talamanca region of Costa Rica	INTEGRATIVE ZOOLOGY	2012	7	4	381	388	Costa Rica	NA	9.1	-82.95	Talamancan montane forests	Tropical & Subtropical Moist Broadleaf Forests	Neotropic	no
762	Gonzalez-Maya, Jose F.; Schipper, Jan; Benitez, Angelica	Activity patterns and community ecology of small carnivores in the Talamanca region, Costa Rica	Small Carnivore Conservation	2009	41	Sp. Iss. SI	9	14	Costa Rica	NA	9.66	-82.83	Isthmian-Atlantic moist forests	Tropical & Subtropical Moist Broadleaf Forests	Neotropic	no
763	Gonzalez-Maya, Jose F.; Schipper, Jan; Rojas-Jimenez, Karla	Elevational distribution and abundance of Baird's tapir (Tapirus bairdii) at different protection areas in Talamanca region of Costa Rica.	Tapir Conservation	2009	18	1	29	35	Costa Rica	NA	9.5	-83.5	Talamancan montane forests	Tropical & Subtropical Moist Broadleaf Forests	Neotropic	no
764	Goodale, Wing; Attix, Lee; Evers, David	Common Loon, Gavia immer, nest attendance patterns recorded by remote video camera	CANADIAN FIELD-NATURALIST	2005	119	3	455	456	USA	NA	44°53'25"	70°45'32"	New England-Acadian forests	Temperate Broadleaf & Mixed Forests	Nearctic	no
765	Gooley, Aaron C.; Schauber, Eric M.	Pursuing packrats: An evaluation of noninvasive detection methods for Neotoma	WILDLIFE SOCIETY BULLETIN	2018	42	4	701	705	USA	NA	37.61	-88.4	Interior Plateau US Hardwood Forests	Temperate Broadleaf & Mixed Forests	Nearctic	no
766	Gopal, Rajesh; Qureshi, Qamar; Bhardwaj, Manish; Singh, R. K. Jagadish; Jhala, Yadvendradev V.	Evaluating the status of the Endangered tiger Panthera tigris and its prey in Panna Tiger Reserve, Madhya Pradesh, India	ORYX	2010	44	3	383	389	India	Asia	24.62	79.98	Narmada Valley dry deciduous forests	Tropical & Subtropical Dry Broadleaf Forests	Indomalayan	no
768	Gopalaswamy, Arjun M.; Royle, J. Andrew; Hines, James E.; Singh, Pallavi; Jathanna, Devcharan; Kumar, N. Samba; Karanth, K. Ullas	Program SPACECAP: software for estimating animal density using spatially explicit capture-recapture models	METHODS IN ECOLOGY AND EVOLUTION	2012	3	6	1067	1072
769	Gopalaswamy, Arjun M.; Royle, J. Andrew; Delampady, Mohan; Nichols, James D.; Karanth, K. Ullas; Macdonald, David W.	Density estimation in tiger populations: combining information for strong inference	ECOLOGY	2012	93	7	1741	1751	India	Asia	11.75	76.45	South Western Ghats montane rain forests	Tropical & Subtropical Moist Broadleaf Forests	Indomalayan	no
771	Gormley, Andrew M.; Forsyth, David M.; Griffioen, Peter; Lindeman, Michael; Ramsey, David S. L.; Scroggie, Michael P.; Woodford, Luke	Using presence-only and presence-absence data to estimate the current and potential distributions of established invasive species	JOURNAL OF APPLIED ECOLOGY	2011	48	1	25	34	Australia	Australia	-37.21	146.25	Southeast Australia temperate forests	Temperate Broadleaf & Mixed Forests	Australasia	no
771	Gormley, Andrew M.; Forsyth, David M.; Griffioen, Peter; Lindeman, Michael; Ramsey, David S. L.; Scroggie, Michael P.; Woodford, Luke	Using presence-only and presence-absence data to estimate the current and potential distributions of established invasive species	JOURNAL OF APPLIED ECOLOGY	2011	48	1	25	34	Australia	Australia	-37.21	146.25	Eastern Australian temperate forests	Temperate Broadleaf & Mixed Forests	Australasia
771	Gormley, Andrew M.; Forsyth, David M.; Griffioen, Peter; Lindeman, Michael; Ramsey, David S. L.; Scroggie, Michael P.; Woodford, Luke	Using presence-only and presence-absence data to estimate the current and potential distributions of established invasive species	JOURNAL OF APPLIED ECOLOGY	2011	48	1	25	34	Australia	Australia	-37.21	146.25	Australian Alps montane grasslands	Montane Grasslands & Shrublands	Australasia
771	Gormley, Andrew M.; Forsyth, David M.; Griffioen, Peter; Lindeman, Michael; Ramsey, David S. L.; Scroggie, Michael P.; Woodford, Luke	Using presence-only and presence-absence data to estimate the current and potential distributions of established invasive species	JOURNAL OF APPLIED ECOLOGY	2011	48	1	25	34	Australia	Australia	-37.21	146.25	Southeast Australia temperate savanna	Temperate Grasslands, Savannas & Shrublands	Australasia
771	Gormley, Andrew M.; Forsyth, David M.; Griffioen, Peter; Lindeman, Michael; Ramsey, David S. L.; Scroggie, Michael P.; Woodford, Luke	Using presence-only and presence-absence data to estimate the current and potential distributions of established invasive species	JOURNAL OF APPLIED ECOLOGY	2011	48	1	25	34	Australia	Australia	-37.21	146.25	Murray-Darling woodlands and mallee	Mediterranean Forests, Woodlands & Scrub	Australasia
772	Gouda, Sushanto; Sethy, Janmejay; Chauhan, N.P.S.	First photo capture of Asiatic golden cat in Dampa Tiger Reserve, Mizoram, India.	Cat News	2016	64		26	27	India	Asia	23.410656° N	92.222189° E)	Mizoram-Manipur-Kachin rain forests	Tropical & Subtropical Moist Broadleaf Forests	Indomalayan	no
773	Goulart, Fernando Vilas Boas; Caceres, Nilton Carlos; Graipel, Mauricio Eduardo; Tortato, Marcos Adriano; Ghizoni, Ivo Rohling, Jr.; Rodrigues Oliveira-Santos, Luiz Gustavo	Habitat selection by large mammals in a southern Brazilian Atlantic Forest	MAMMALIAN BIOLOGY	2009	74	3	182	190	Brazil	SA	-27.4308	-48.8503	Serra do Mar coastal forests	Tropical & Subtropical Moist Broadleaf Forests	Neotropic	no
774	Gould, Matthew J.; Harrison, Robert L.	A novel approach to estimating density of American badgers (Taxidea taxus) using automatic cameras at water sources in the Chihuahuan Desert	JOURNAL OF MAMMALOGY	2018	99	1	233	241	USA	NA	33.333	-107	Chihuahuan desert	Deserts & Xeric Shrublands	Nearctic	no
775	Gracanin, Ana; Gracanin, Vanja; Mikac, Katarina M.	The selfie trap: A novel camera trap design for accurate small mammal identification	ECOLOGICAL MANAGEMENT & RESTORATION	2019	20	2	156	158	Australia	Australia	-34.42	150.85	Eastern Australian temperate forests	Temperate Broadleaf & Mixed Forests	Australasia	no
776	Graham, Jake D.; Hafs, Andrew W.; Kennedy, Anthony J.	Does a Bioenergetics Model Accurately Predict Fish Consumption by American White Pelicans? A Case Study on Walleyes in the Tamarac River, Minnesota	NORTH AMERICAN JOURNAL OF FISHERIES MANAGEMENT	2019	39	3	485	497	USA	NA	48.03	-94.66	Western Great Lakes forests	Temperate Broadleaf & Mixed Forests	Nearctic	no
777	Graipel, M. E.; Oliveira-Santos, L. G. R.; Goulart, F. V. B.; Tortato, M. A.; Miller, P. R. M.; Caceres, N. C.	The role of melanism in oncillas on the temporal segregation of nocturnal activity	BRAZILIAN JOURNAL OF BIOLOGY	2014	74	3	142	145	Brazil	SA	27°27?S	48°57?W	Serra do Mar coastal forests	Tropical & Subtropical Moist Broadleaf Forests	Neotropic	no
778	Granados, Alys; Bernard, Henry; Brodie, Jedediah F.	The influence of logging on vertebrate responses to mast fruiting	JOURNAL OF ANIMAL ECOLOGY	2019	88	6	892	902	Malaysia	Asia	N 5.102°	E 117.688°	Borneo lowland rain forests	Tropical & Subtropical Moist Broadleaf Forests	Indomalayan	no
780	Granados, Alys; Crowther, Kyle; Brodie, Jedediah F.; Bernard, Henry	Persistence of mammals in a selectively logged forest in Malaysian Borneo	MAMMALIAN BIOLOGY	2016	81	3	268	273	Malaysia	Asia	N 5.102°	E 117.688°	Borneo lowland rain forests	Tropical & Subtropical Moist Broadleaf Forests	Indomalayan	no
781	Gray, T. N. E.	Monitoring tropical forest ungulates using camera-trap data	JOURNAL OF ZOOLOGY	2018	305	3	173	179	Cambodia	Asia	11°47?N	103°20?E)	Cardamom Mountains rain forests	Tropical & Subtropical moist Broadleaf Forests	Indomalayan	no
782	Gray, T. N. E.; Pin, C.; Phan, C.; Crouthers, R.; Kamler, J. F.; Prum, S.	Camera-trap records of small carnivores from eastern Cambodia, 1999-2013	Small Carnivore Conservation	2014	50		20	24	Cambodia	Asia	12.6667	107	Central Indochina dry forests	Tropical & Subtropical Dry Broadleaf Forests	Indomalayan	no
782	Gray, T. N. E.; Pin, C.; Phan, C.; Crouthers, R.; Kamler, J. F.; Prum, S.	Camera-trap records of small carnivores from eastern Cambodia, 1999-2014	Small Carnivore Conservation	2014	50		20	24	Cambodia	Asia	12.6667	107	Southeast Indochina dry evergreen forests	Tropical & Subtropical Dry Broadleaf Forests	Indomalayan
783	Gray, Thomas N.E.; Billingsley, Andrew; Crudge, Brian; Frechette, Jackson L.; Grosu, Romica; Herranz-Munoz, Vanessa; Holden, Jeremy; Keo, Omaliss; Kong, Kimsreng; Macdonald, David; Neang, Thy; Ou, Ratanak; Phan, Channa; Sim, Sovannarun	Status and conservation significance of ground-dwelling mammals in the Cardamom Rainforest Landscape, southwestern Cambodia.	Cambodian Journal of Natural History	2017	1		38	48	Cambodia	Asia	11.55	103.38	Cardamom Mountains rain forests	Tropical & Subtropical Moist Broadleaf Forests	Indomalayan	no
784	Gray, Thomas N. E.; McShea, William J.; Koehncke, Arnulf; Sovanna, Prum; Wright, Mark	ARTIFICIAL DEEPENING OF SEASONAL WATERHOLES IN EASTERN CAMBODIA: IMPAET ON WATER RETENTION AND USE BY LARGE UNGULATES AND WATERBIRDS	Journal of Threatened Taxa	2015	7	6	7189	7195	Cambodia	Asia	13.07	107.19	Central Indochina dry forests	Tropical & Subtropical Dry Broadleaf Forests	Indomalayan	no
785	Gray, Thomas N. E.; Thongsamouth, Khamhou; Tilker, Andrew	Recent camera-trap records of Owston's Civet Chrotogale owstoni and other small carnivores from Xe Sap National Protected Area, southern Lao PDR	Small Carnivore Conservation	2014	51		29	33
786	Gray, Thomas N.E.; Channa, Phan; Chanrattanak, Pin; Sovanna, Prum	The status of jungle cat and sympatric small cats in Cambodia's Eastern Plains.	Cat News	2014			19	23	Cambodia	Asia	12.13333 106.083333		Southeast Indochina dry evergreen forests	Tropical & Subtropical Dry Broadleaf Forests	Indomalayan	no
786	Gray, Thomas N.E.; Channa, Phan; Chanrattanak, Pin; Sovanna, Prum	The status of jungle cat and sympatric small cats in Cambodia's Eastern Plains.	Cat News	2014			19	23	Cambodia	Asia	12.6667	107	Central Indochina dry forests	Tropical & Subtropical Dry Broadleaf Forests	Indomalayan
787	Gray, Thomas N. E.	Studying Large Mammals With Imperfect Detection: Status and Habitat Preferences of Wild Cattle and Large Carnivores in Eastern Cambodia	BIOTROPICA	2012	44	4	531	536	Cambodia	Asia	12.9667	107.333	Central Indochina dry forests	Tropical & Subtropical Dry Broadleaf Forests	Indomalayan	no
788	Gray, Thomas N.E.; Ou, Rattanak; Huy, Keavuth; Pin, Chanrattana; Maxwell, Andrew L.	The status of large mammals in eastern Cambodia: a review of camera trapping data 1999-2007.	Cambodian Journal of Natural History	2012	2012	1	42	55	Cambodia	Asia	12.6667	107	Central Indochina dry forests	Tropical & Subtropical Dry Broadleaf Forests	Indomalayan	no
788	Gray, Thomas N.E.; Ou, Rattanak; Huy, Keavuth; Pin, Chanrattana; Maxwell, Andrew L.	The status of large mammals in eastern Cambodia: a review of camera trapping data 1999-2007.	Cambodian Journal of Natural History	2012	2012	1	42	55	Cambodia	Asia	13.6667	107	Southeast Indochina dry evergreen forests	Tropical & Subtropical Dry Broadleaf Forests	Indomalayan
789	Gray, Thomas N. E.; Phan, Channa	HABITAT PREFERENCES AND ACTIVITY PATTERNS OF THE LARGER MAMMAL COMMUNITY IN PHNOM PRICH WILDLIFE SANCTUARY, CAMBODIA	RAFFLES BULLETIN OF ZOOLOGY	2011	59	2	311	318	Cambodia	Asia	12.8° N	106.5° E	Central Indochina dry forests	Tropical & Subtropical Dry Broadleaf Forests	Indomalayan	no
790	Gray, Thomas Neill Edward	ACTIVITY PATTERNS AND HOME RANGES OF INDOCHINESE LEOPARD PANTHERA PARDUS DELACOURI IN THE EASTERN PLAINS LANDSCAPE, CAMBODIA	Natural History Bulletin of the Siam Society	2013	59	1	39	47	Cambodia	Asia	13.10 N	107.4 E	Central Indochina dry forests	Tropical & Subtropical Dry Broadleaf Forests	Indomalayan	no
791	Green-Barber, Jai M.; Old, Julie M.	Is camera trap videography suitable for assessing activity patterns in eastern grey kangaroos?	Pacific Conservation Biology	2018	24	2	134	141	Australia	Australia	-33.62	150.73	Eastern Australian temperate forests	Temperate Broadleaf & Mixed Forests	Australasia	yes
792	Greenberg, Saul; Godin, Theresa; Whittington, Jesse	Design patterns for wildlife-related camera trap image analysis	ECOLOGY AND EVOLUTION	2019	9	24	13706	13730
793	Greenberg, Saul; Godin, Theresa	A Tool Supporting the Extraction of Angling Effort Data from Remote Camera Images	FISHERIES	2015	40	6	276	287
794	Greene, Daniel U.; McCleery, Robert A.	Multi-scale responses of fox squirrels to land-use changes in Florida: Utilization mimics historic pine savannas	FOREST ECOLOGY AND MANAGEMENT	2017	391		42	51	USA	NA	30 N	82 W	Southeast US conifer savannas	Temperate Grasslands, Savannas & Shrublands	Nearctic	yes
795	Greene, Daniel U.; McCleery, Robert A.; Wagner, Lindsay M.; Garrison, Elina P.	A Comparison of Four Survey Methods for Detecting Fox Squirrels in the Southeastern United States	JOURNAL OF FISH AND WILDLIFE MANAGEMENT	2016	7	1	99	106	USA	NA	29.98	-82.03	Southeast US conifer savannas	Temperate Grasslands, Savannas & Shrublands	Nearctic	no
796	Greenspan, Evan; Nielsen, Clayton K.; Cassel, Kevin W.	Potential distribution of coyotes (Canis latrans), Virginia opossums (Didelphis virginiana), striped skunks (Mephitis mephitis), and raccoons (Procyon lotor) in the Chicago Metropolitan Area	URBAN ECOSYSTEMS	2018	21	5	983	997	USA	NA	42.28	-87.92	Central US forest-grasslands transition	Temperate Grasslands, Savannas & Shrublands	Nearctic	yes
797	Greenville, Aaron C.; Wardle, Glenda M.; Dickman, Chris R.	Desert mammal populations are limited by introduced predators rather than future climate change	ROYAL SOCIETY OPEN SCIENCE	2017	4	11			Australia	Australia	-24.12	137.94	Simpson desert	Deserts & Xeric Shrublands	Australasia	no
798	Greenville, Aaron C.; Wardle, Glenda M.; Tamayo, Bobby; Dickman, Chris R.	Bottom-up and top-down processes interact to modify intraguild interactions in resource-pulse environments	OECOLOGIA	2014	175	4	1349	1358	Australia	Australia	-24.12	137.94	Simpson desert	Deserts & Xeric Shrublands	Australasia	no
799	Gregory, Tremaine; Lunde, Darrin; Tomas Zamora-Meza, Hugo; Carrasco-Rueda, Farah	Records of Coendou ichillus (Rodentia, Erethizontidae) from the Lower Urubamba Region of Peru	ZOOKEYS	2015		509	109	121	Peru	SA	11°43.28'S	11°43.28'S	Southwest Amazon moist forests	Tropical & Subtropical Moist Broadleaf Forests	Neotropic	no
800	Gregory, Tremaine; Rueda, Farah Carrasco; Deichmann, Jessica; Kolowski, Joseph; Alonso, Alfonso	Arboreal camera trapping: taking a proven method to new heights	METHODS IN ECOLOGY AND EVOLUTION	2014	5	5	443	451	Peru	SA	11°42?S	72°48?W	Southwest Amazon moist forests	Tropical & Subtropical Moist Broadleaf Forests	Neotropic	no
801	Griffiths, Leila	Use of a remote camera to rapidly assess Eurasian badger Meles meles occupancy within a sett to be lost due to pipeline laying near Uppingham, Rutland, England.	Conservation Evidence	2008	5		92	94	UK	Europe	52.38	-0.82	England Lowlands beech forest	Temperate Broadleaf & Mixed Forests	Palearctic	no
801	Griffiths, Leila	Use of a remote camera to rapidly assess Eurasian badger Meles meles occupancy within a sett to be lost due to pipeline laying near Uppingham, Rutland, England.	Conservation Evidence	2008	5		92	94	UK	Europe	52.38	-0.82	Celtic broadleaf forests	Temperate Broadleaf & Mixed Forests	Palearctic
802	Gross, Rodney, Jr.; Tucker, Stephanie; Darby, Brian; Ellis-Felege, Susan N.	Difference in exposure of water birds to covered and uncovered float muskrat sets	WILDLIFE BIOLOGY	2017					USA	NA	47.97	-99.01	Candian Aspen forests and parklands	Temperate Grasslands, Savannas & Shrublands	Nearctic	no
802	Gross, Rodney, Jr.; Tucker, Stephanie; Darby, Brian; Ellis-Felege, Susan N.	Difference in exposure of water birds to covered and uncovered float muskrat sets	WILDLIFE BIOLOGY	2018					USA	NA	47.97	-99.01	Northern Shortgrass prairie	Temperate Grasslands, Savannas & Shrublands	Nearctic
803	Grueebler, Martin U.; Mueller, Martina; Michel, Vanja T.; Perrig, Marco; Keil, Herbert; Naef-Daenzer, Beat; Korner-Nievergelt, Fraenzi	Brood provisioning and reproductive benefits in relation to habitat quality: a food supplementation experiment	ANIMAL BEHAVIOUR	2018	141		45	55	Germany	Europe	48°53?N	9°11?E	Western European broadleaf forests	Temperate Broadleaf & Mixed Forests	Palearctic	yes
804	Guarda, Nicolas; Galvez, Nicolas; Leichtle, Jorge; Osorio, Christian; Bonacic, Cristian	Puma Puma concolor density estimation in the Mediterranean Andes of Chile	ORYX	2017	51	2	263	267	Chile	SA	-34.5	-70.42	Valdivian temperate forests	Temperate Broadleaf & Mixed Forests	Neotropic	no
805	Gubbi, S.; Reddy, V.; Nagashettihalli, H.; Bhat, R.; Madhusudan, M. D.	Photographic records of the Ratel Mellivora capensis from the southern Indian state of Karnataka	Small Carnivore Conservation	2014	50		42	44	India	Asia	12°24?36?N	77°46?40?E	South Deccan Plateau dry deciduous forests	Tropical & Subtropical Dry Broadleaf Forests	Indomalayan	no
806	Gubbi, Sanjay; Poornesha, H. C.; Madhusudan, M. D.	Impact of vehicular traffic on the use of highway edges by large mammals in a South Indian wildlife reserve	CURRENT SCIENCE	2012	102	7	1047	1051	India	Asia	11.98	76.23	South Western Ghats montane rain forests	Tropical & Subtropical Moist Broadleaf Forests	Indomalayan	yes
807	Gucu, Al Cemal	Preliminary study on the effects of photo traps used to monitor Mediterranean monk seals Monachus monachus	Endangered Species Research	2010	10	###	281	285	Turkey	Europe	36.8	34.63	Eastern Mediterranean conifer-broadleaf forests	Mediterranean Forests, Woodlands & Scrub	Palearctic	no
808	Gucu, Ali Cemal; Sakinan, Serdar; Ok, Meltem	Occurrence of the critically endangered Mediterranean Monk Seal, Monachus monachus, at Olympos-Beydaglari National Park, Turkey (Mammalia: Phocidae)	ZOOLOGY IN THE MIDDLE EAST	2009	46		3	8	Turkey	Europe	36.59	30.58	Southern Anatolian montane conifer and deciduous forests	Mediterranean Forests, Woodlands & Scrub	Palearctic	no
808	Gucu, Ali Cemal; Sakinan, Serdar; Ok, Meltem	Occurrence of the critically endangered Mediterranean Monk Seal, Monachus monachus, at Olympos-Beydaglari National Park, Turkey (Mammalia: Phocidae)	ZOOLOGY IN THE MIDDLE EAST	2009	46		3	8	Turkey	Europe	36.59	30.58	Aegean and Western Turkey sclerophyllous and mixed forests	Mediterranean Forests, Woodlands & Scrub	Palearctic
809	Guethlin, Denise; Storch, Ilse; Kuechenhoff, Helmut	Toward Reliable Estimates of Abundance: Comparing Index Methods to Assess the Abundance of a Mammalian Predator	PLOS ONE	2014	9	4			Germany	Europe	48.26	8.18	Western European broadleaf forests	Temperate Broadleaf & Mixed Forests	Palearctic	no
811	Guethlin, Denise; Storch, Ilse; Kuechenhoff, Helmut	Is it Possible to Individually Identify Red Foxes from Photographs?	WILDLIFE SOCIETY BULLETIN	2014	38	1	205	210	Germany	Europe	48.81	8.27	Western European broadleaf forests	Temperate Broadleaf & Mixed Forests	Palearctic	no
812	Guillera-Arroita, Gurutzeta; Morgan, Byron J. T.; Ridout, Martin S.; Linkie, Matthew	Species Occupancy Modeling for Detection Data Collected Along a Transect	JOURNAL OF AGRICULTURAL BIOLOGICAL AND ENVIRONMENTAL STATISTICS	2011	16	3	301	317
813	Gulci, Sercan; Akay, Abdullah Emin	Using thermal infrared imagery produced by unmanned air vehicles to evaluate locations of ecological road structures	JOURNAL OF THE FACULTY OF FORESTRY-ISTANBUL UNIVERSITY	2016	66	2	698	709
814	Gulsby, William D.; Killmaster, Charlie H.; Bowers, John W.; Kelly, James D.; Sacks, Benjamin N.; Statham, Mark J.; Miller, Karl V.	White-Tailed Deer Fawn Recruitment Before and After Experimental Coyote Removals in Central Georgia	WILDLIFE SOCIETY BULLETIN	2015	39	2	248	255	USA	NA	33.32	-83.52	Appalachian Piedmont forests	Temperate Broadleaf & Mixed Forests	Nearctic	yes
815	Gumal, Melvin; Salleh, Abu Bakar Bin Mohamed; Yasak, Mohd Nawayai; Horng, Liang Song; Lee, Benjamin P. Y-H.; Pheng, Low Chee; Hamzah, Hasnizam; Kong, Daniel; Magintan, David; Yung, Dennis Ten Choon; Bin Zalaluddin, Ahmad Zulfi; Azmi, Azima Binti; Khalid, Norhidayati Binti; Yen, Thai Poh; Mufeng, Voon; Meng, Francis Cheong Fook; Ng, Sylvia	Small-medium wild cats of Endau Rompin Landscape in Johor, Peninsular Malaysia.	Cat News	2014			10	18	Malaysia	Asia	2.42	103.68	Peninsular Malaysian rain forests	Tropical & Subtropical Moist Broadleaf Forests	Indomalayan	no
816	Gundogdu, E.; Sari, A.; Arpacik, A.; Baskaya, S.	NEW RECORD OF THE ASIATIC WILDCAT (FELLS SILVESTRIS ORNATA GRAY 1830) IN NORTHEASTERN ANATOLIA	APPLIED ECOLOGY AND ENVIRONMENTAL RESEARCH	2018	16	5	6779	6785	Turkey	Asia	39°23’52”N	40°36’39”E	Eastern Anatolian montane steppe	Temperate Grasslands, Savannas & Shrublands	Palearctic	no
817	Guo, Songtao; Qiang, Min; Luan, Xiaorui; Xu, Pengfei; He, Gang; Yin, Xiaoyan; Xi, Luo; Jin, Xuelin; Shao, Jianbin; Chen, Xiaojiang; Fang, Dingyi; Li, Baoguo	The application of the Internet of Things to animal ecology	INTEGRATIVE ZOOLOGY	2015	10	6	572	578
818	Guo, Wei; Cao, Guanghong; Quan, Rui-Chang	Population dynamics and space use of wild boar in a tropical forest, Southwest China	GLOBAL ECOLOGY AND CONSERVATION	2017	11		115	124	China	Asia	22.16	100.66	Northern Indochina subtropical forests	Tropical & Subtropical Moist Broadleaf Forests	Indomalayan	no
819	Guo Wei; Zhang Mingxia; Zhou Liping; Quan Ruichang	The rediscovery of Large-spotted Civet Viverra megaspila in China	Small Carnivore Conservation	2017	55		88	90	China	Asia	22.01	100.88	Northern Indochina subtropical forests	Tropical & Subtropical Moist Broadleaf Forests	Indomalayan	no
820	Gupta, S.; Mondal, K.; Sankar, K.; Qureshi, Q.	ABUNDANCE AND HABITAT SUITABILITY MODEL FOR RATEL (MELLIVORA CAPENSIS) IN SARISKA TIGER RESERVE, WESTERN INDIA.	Wildlife Biology in Practice	2012	8	1	13	22	India	Asia	27.32	76.43	Khathiar-Gir dry deciduous forests	Tropical & Subtropical Dry Broadleaf Forests	Indomalayan	no
821	Gupta, Shilpi; Mondal, Krishnendu; Sankar, K.; Qureshi, Qamar	ESTIMATION OF STRIPED HYENA HYAENA HYAENA POPULATION USING CAMERA TRAPS IN SARISKA TIGER RESERVE, RAJASTHAN, INDIA	Journal of the Bombay Natural History Society	2009	106	3	284	288	India	Asia	27.32	76.43	Khathiar-Gir dry deciduous forests	Tropical & Subtropical Dry Broadleaf Forests	Indomalayan	no
822	Gutierrez, Beatriz Lopez; Zambrano, Angelica M. Almeyda; Zambrano, Sandra L. Almeyda; Gil, Carlos A. Quispe; Bohlman, Stephanie; Avellan Arias, Eduardo; Mulder, Guillermo; Ols, Clare; Dirzo, Rodolfo; DeLuycker, Anneke M.; Lewis, Karen; Broadbent, Eben N.	An island of wildlife in a human-dominated landscape: The last fragment of primary forest on the Osa Peninsula's Golfo Dulce coastline, Costa Rica	PLOS ONE	2019	14	3			Costa Rica	NA	N 8° 24' 0.9''	W 83° 17' 5.892''	Isthmian-Pacific moist forests	Tropical & Subtropical Moist Broadleaf Forests	Neotropic	no
822	Gutierrez, Beatriz Lopez; Zambrano, Angelica M. Almeyda; Zambrano, Sandra L. Almeyda; Gil, Carlos A. Quispe; Bohlman, Stephanie; Avellan Arias, Eduardo; Mulder, Guillermo; Ols, Clare; Dirzo, Rodolfo; DeLuycker, Anneke M.; Lewis, Karen; Broadbent, Eben N.	An island of wildlife in a human-dominated landscape: The last fragment of primary forest on the Osa Peninsula's Golfo Dulce coastline, Costa Rica	PLOS ONE	2019	14	3			Costa Rica	NA	N 8° 34' 32.278''	W 83° 21' 32.802''	Southern Mesoamerican Pacific mangroves	Mangroves	Neotropic
823	Gutierrez-Gonzalez, Carmina E.; Gomez-Ramirez, Miguel A.; Lopez-Gonzalez, Carlos A.; Doherty, Paul F., Jr.	Are Private Reserves Effective for Jaguar Conservation?	PLOS ONE	2015	10	9			Mexico	NA	29° 32.4 'N	109° 14.4' W	Sonoran-Sinaloan subtropical dry forest	Tropical & Subtropical Dry Broadleaf Forests	Nearctic	no
823	Gutierrez-Gonzalez, Carmina E.; Gomez-Ramirez, Miguel A.; Lopez-Gonzalez, Carlos A.; Doherty, Paul F., Jr.	Are Private Reserves Effective for Jaguar Conservation?	PLOS ONE	2015	10	9			Mexico	NA	29° 32.4 'N	109° 14.4' W	Sierra Madre Occidental pine-oak forests	Tropical & Subtropical Coniferous Forests	Nearctic
824	Gutierrez-Gonzalez, Carmina E.; Gomez-Ramirez, Miguel A.; Lopez-Gonzalez, Carlos A.	Estimation of the density of the Near Threatened jaguar Panthera onca in Sonora, Mexico, using camera trapping and an open population model	ORYX	2012	46	3	431	437	Mexico	NA	29° 32.4 'N	109° 14.4' W	Sonoran-Sinaloan subtropical dry forest	Tropical & Subtropical Dry Broadleaf Forests	Nearctic	no
824	Gutierrez-Gonzalez, Carmina E.; Gomez-Ramirez, Miguel A.; Lopez-Gonzalez, Carlos A.	Estimation of the density of the Near Threatened jaguar Panthera onca in Sonora, Mexico, using camera trapping and an open population model	ORYX	2012	46	3	431	437	Mexico	NA	29° 32.4 'N	109° 14.4' W	Sierra Madre Occidental pine-oak forests	Tropical & Subtropical Coniferous Forests	Nearctic
825	Guzvica, Goran; Bosnjak, Ivana; Bielen, Ana; Babic, Danijel; Radanovic-Guzvica, Biserka; Sver, Lidija	Comparative Analysis of Three Different Methods for Monitoring the Use of Green Bridges by Wildlife	PLOS ONE	2014	9	8			Croatia	Europe	N 45 22.426	E 15 16.161	Pannian mixed forests	Temperate Broadleaf & Mixed Forests	Palearctic	yes
826	Haarsma, Anne-Jifke; Kaal, Rutger	Predation of wood mice (Apodemus sylvaticus) on hibernating bats	POPULATION ECOLOGY	2016	58	4	567	576	Netherlands	Europe	52.15	4.34	European Atlantic mixed forests	Temperate Broadleaf & Mixed Forests	Palearctic	yes
827	Hackett, H. Mundy; Lesmeister, Damon B.; Desanty-Combes, Jacqueline; Montague, Warren G.; Millspaugh, Joshua J.; Gompper, Matthew E.	Detection rates of eastern spotted skunks (Spilogale putorius) in Missouri and Arkansas using live-capture and non-invasive techniques	AMERICAN MIDLAND NATURALIST	2007	158	1	123	131	USA	NA	37°27?49?N	?90°13?03?W	Ozark Highlands mixed forests	Temperate Broadleaf & Mixed Forests	Nearctic	no
827	Hackett, H. Mundy; Lesmeister, Damon B.; Desanty-Combes, Jacqueline; Montague, Warren G.; Millspaugh, Joshua J.; Gompper, Matthew E.	Detection rates of eastern spotted skunks (Spilogale putorius) in Missouri and Arkansas using live-capture and non-invasive techniques	AMERICAN MIDLAND NATURALIST	2007	158	1	123	131	USA	NA	34°48?29?N	90°20?54?W	Ozark Mountain forests	Temperate Broadleaf & Mixed Forests	Nearctic	no
828	Hadik-Barkoczy, Laszlo B.	First camera trap record of crab-eating fox on Auyan Tepui, Venezuela.	Canid News	2013	16	4	12	15	Venezuela	SA	5.91667	-62.5333	Pantepui forests & shrublands	Tropical & Subtropical Moist Broadleaf Forests	Neotropic	no
829	Hadjikyriakou, Thomas G.; Kirschel, Alexander N. G.	VIDEO EVIDENCE CONFIRMS CANNIBALISM IN ELEONORA'S FALCON	JOURNAL OF RAPTOR RESEARCH	2016	50	2	220	223	Cyprus	Europe	34.59	32.99	Cyprus Mediterranean forests	Mediterranean Forests, Woodlands & Scrub	Palearctic	no
830	Haidir, Iding Achmad; Macdonald, David Whyte; Linkie, Matthew	Assessing the spatiotemporal interactions of mesopredators in Sumatra's tropical rainforest	PLOS ONE	2018	13	9			Indonesia	Asia	-2.25	101.32	Sumatran montane rain forests	Tropical & Subtropical Moist Broadleaf Forests	Indomalayan	no
830	Haidir, Iding Achmad; Macdonald, David Whyte; Linkie, Matthew	Assessing the spatiotemporal interactions of mesopredators in Sumatra's tropical rainforest	PLOS ONE	2018	13	9			Indonesia	Asia	-2.25	101.32	Sumatran tropical pine forests	Tropical & Subtropical Coniferous Forests	Indomalayan
830	Haidir, Iding Achmad; Macdonald, David Whyte; Linkie, Matthew	Assessing the spatiotemporal interactions of mesopredators in Sumatra's tropical rainforest	PLOS ONE	2018	13	9			Indonesia	Asia	-2.25	101.32	Sumatran lowland rain forests	Tropical & Subtropical Moist Broadleaf Forests	Indomalayan
831	Haines, AM; Janecka, JE; Tewes, ME; Grassman, LI; Morton, P	The importance of private lands for ocelot Leopardus pardalis conservation in the United States	ORYX	2006	40	1	90	94	USA	NA	26.24	-97.35	Western Gulf coastal grasslands	Tropical & Subtropical Grasslands, Savannas & Shrublands	Nearctic	yes
833	Hambali, Kamarul; Ab Razak, Muhamad Hamirul Shah; Abdullah, Mohd Saupi; Aziz, Mohd Aisamuddin Abdl	First camera trap photo of marbled cat in Ulu Sat Permanent Forest Reserve, Malaysia.	Cat News	2019	69		38	40	Malaysia	Asia	5.73	102.36	Peninsular Malaysian rain forests	Tropical & Subtropical Moist Broadleaf Forests	Indomalayan	no
834	Hameed, Shoaib; Din, Jaffar Ud; Shah, Khurshid Ali; Kabir, Muhammad; Ayub, Muhammad; Khan, Siraj; Bischof, Richard; Nawaz, Doost Ali; Nawaz, Muhammad Ali	Pallas's cat photographed in Qurumber National Park, Gilgit-Baltistan, Pakistan.	Cat News	2014	60		21	22	Pakistan	Asia	36.67406°N	74.05497°E	Karakoram-West Tibetan Plateau alpine steppe	Montane Grasslands & Shrublands	Palearctic	no
835	Hamel, Sandra; Killengreen, Siw T.; Henden, John-Andre; Eide, Nina E.; Roed-Eriksen, Lars; Ims, Rolf A.; Yoccoz, Nigel G.	Towards good practice guidance in using camera-traps in ecology: influence of sampling design on validity of ecological inferences	METHODS IN ECOLOGY AND EVOLUTION	2013	4	2	105	113	Norway	Europe	70	23.9	Scandanavian Montane Birch forest and grasslands	Tundra	Palearctic	no
836	Hamidi, Amirhossein Kh.; Ghoddousi, Arash; Soufi, Mahmoud; Ghadirian, Taher; Jowkar, Houman; Ashayeri, Sheyda	Camera trap study of Persian leopard in Golestan National Park, Iran.	Cat News	2014	60		12	14	Iran	Asia	37.55	56.38	Elburz Range forest steppe	Temperate Conifer Forests	Palearctic	no
836	Hamidi, Amirhossein Kh.; Ghoddousi, Arash; Soufi, Mahmoud; Ghadirian, Taher; Jowkar, Houman; Ashayeri, Sheyda	Camera trap study of Persian leopard in Golestan National Park, Iran.	Cat News	2014	60		12	14	Iran	Asia	37.55	56.38	Caspian Hyrcanian mixed forests	Temperate Broadleaf & Mixed Forests	Palearctic
837	Hamirul, Muhamad; Wong, Christopher Chai Thiam; Mohamed, Azlan; Lau, Ching Fong; Mohamad, Shariff Wan; Siwan, Elangkumaran Sagtia; Rayan, D. Mark	Recent records of Large-spotted Civet Viverra megaspila from Peninsular Malaysia	Small Carnivore Conservation	2015	52-53		74	83	Malaysia	Asia	5.33333	101	Peninsular Malaysian rain forests	Tropical & Subtropical Moist Broadleaf Forests	Indomalayan	yes
839	Hand, Christine E.; Znidersic, Elizabeth; Tegeler, Amy K.	First Documentation of Eastern Black Rails (Laterallus jamaicensis jamaicensis) Breeding in South Carolina, USA in More Than a Century	WATERBIRDS	2019	42	2	237	241	USA	NA	32° 35? N	80° 27? W	Southeast US conifer savannas	Temperate Grasslands, Savannas & Shrublands	Nearctic	no
840	Hanke, Petra U.; Dickman, Christopher R.	Sniffing out the stakes: hair-snares for wild cats in arid environments	WILDLIFE RESEARCH	2013	40	1	45	51	Australia	Australia	25.25° S	140.98° E	SImpson desert	Deserts & Xeric Shrublands	Australasia	no
841	Hannibal, Wellington; Arguelho, Wesley Correa; Moreira, Janio Cordeiro; Aoki, Camila	USE OF UNDERSTORY FOR FRUGIVORY BY Thrichomys fosteri (RODENTIA, ECHIMYIDAE)	Oecologia Australis	2019	23	4, Sp. Iss. SI	1100	1103	Brazil	SA	20°13’36” S	55°51’49” W	Cerrado	Tropical & Subtropical Grasslands, Savannas & Shrublands	Neotropic	no
842	Hansen, Cara M.; Paterson, Adrian M.; Ross, James G.; Ogilvie, Shaun C.	Estimating feral cat (Felis catus) density in a rural to urban gradient using camera trapping	NEW ZEALAND JOURNAL OF ZOOLOGY	2018	45	3	213	226	New Zealand	Zealandia	43°39?21.09?S	172°42?20.66?E	Canterbury-Otago tussock grasslands	Temperate Grasslands, Savannas & Shrublands	Australasia	yes
843	Hansen, Oskar L. P.; Svenning, Jens-Christian; Olsen, Kent; Dupont, Steen; Garner, Beulah H.; Iosifidis, Alexandros; Price, Benjamin W.; Hoye, Toke T.	Species-level image classification with convolutional neural network enables insect identification from habitus images	ECOLOGY AND EVOLUTION	2020	10	2	737	747
844	Hanson, C.C.; Hall, T.J.; DeNicola, A.J.; Silander, S.; Keitt, Rs; Campbell, K.J.	Rhesus macaque eradication to restore the ecological integrity of Desecheo National Wildlife Refuge, Puerto Rico.	Occasional Papers of the IUCN Species Survival Commission	2019	62		249	255	USA	NA	18° 23’ N	67° 29’ W	Puerto Rican moist forests	Tropical & Subtropical Moist Broadleaf Forests	Neotropic	no
845	Harihar, Abishek; Ghosh, Mousumi; Fernandes, Merwyn; Pandav, Bivash; Goyal, Surendra P.	Use of photographic capture-recapture sampling to estimate density of Striped Hyena (Hyaena hyaena): implications for conservation	MAMMALIA	2010	74	1	83	87	India	Asia	29.98	78.22	Upper Gangetic Plains moist deciduous forests	Tropical & Subtropical Moist Broadleaf Forests	Indomalayan	no
846	Harihar, Abishek; Pandav, Bivash; Goyal, Surendra Prakash	Subsampling photographic capture-recapture data of tigers (Panthera tigris) to minimize closure violation and improve estimate precision: a case	POPULATION ECOLOGY	2009	51	4	471	479	India	Asia	29.98	78.22	Upper Gangetic Plains moist deciduous forests	Tropical & Subtropical Moist Broadleaf Forests	Indomalayan	no
847	Hariyadi, Adhi R.; Setiawan, Ridwan; Daryan, Asep Yayus; Purnama, Hendra	Preliminary behaviour observations of the Javan rhinoceros (Rhinoceros sondaicus) based on video trap surveys in Ujung Kulon National Park	PACHYDERM	2010		47	93	99	Indonesia	Asia	-6.75	105.36	Western Java rain forests	Tropical & Subtropical Moist Broadleaf Forests	Indomalayan	no
848	Hariyadi, Adhi Rachmat Sudrajat; Priambudi, Agus; Setiawan, Ridwan; Daryan, Daryan; Yayus, Asep; Purnama, Hendra	Estimating the population structure of Javan rhinos (Rhinoceros sondaicus) in Ujung Kulon National Park using the mark-recapture method based on video and camera trap identification	PACHYDERM	2011		49	90	99	Indonesia	Asia	-6.75	105.36	Western Java rain forests	Tropical & Subtropical Moist Broadleaf Forests	Indomalayan	no
849	Harmsen, Bart J.; Sanchez, Emma; Figueroa, Omar A.; Gutierrez, Said M.; Doncaster, C. Patrick; Foster, Rebecca J.	Ecology of a versatile canid in the Neotropics: gray foxes (Urocyon cinereoargenteus) in Belize, Central America	MAMMAL RESEARCH	2019	64	3	319	332	Belize	NA	17°21?N	88°32?W	Petén-Veracruz moist forests	Tropical & Subtropical Moist Broadleaf Forests	Neotropic	no
850	Harmsen, Bart J.; Foster, Rebecca J.; Sanchez, Emma; Gutierrez-Gonzalez, Carmina E.; Silver, Scott C.; Ostro, Linde E. T.; Kelly, Marcella J.; Kay, Elma; Quigley, Howard	Long term monitoring of jaguars in the Cockscomb Basin Wildlife Sanctuary, Belize; Implications for camera trap studies of carnivores	PLOS ONE	2017	12	6			Belize	NA	16.78	-88.5	Petén-Veracruz moist forests	Tropical & Subtropical Moist Broadleaf Forests	Neotropic	no
851	Harmsen, Bart J.; Foster, Rebecca J.; Silver, Scott C.; Ostro, Linde E. T.; Doncaster, C. P.	Jaguar and puma activity patterns in relation to their main prey	MAMMALIAN BIOLOGY	2011	76	3	320	324	Belize	NA	16.78	-88.5	Petén-Veracruz moist forests	Tropical & Subtropical Moist Broadleaf Forests	Neotropic	no
852	Harmsen, Bart J.; Foster, Rebecca J.; Doncaster, C. Patrick	Heterogeneous capture rates in low density populations and consequences for capture-recapture analysis of camera-trap data	POPULATION ECOLOGY	2011	53	1	253	259
853	Harmsen, Bart J.; Foster, Rebecca J.; Silver, Scott; Ostro, Linde; Doncaster, C. Patrick	Differential Use of Trails by Forest Mammals and the Implications for Camera-Trap Studies: A Case Study from Belize	BIOTROPICA	2010	42	1	126	133	Belize	NA	16.78	-88.5	Petén-Veracruz moist forests	Tropical & Subtropical Moist Broadleaf Forests	Neotropic	no
854	Harmsen, Bart J.; Foster, Rebecca J.; Silver, Scott C.; Ostro, Linde E. T.; Doncaster, C. Patrick	SPATIAL AND TEMPORAL INTERACTIONS OF SYMPATRIC JAGUARS (PANTHERA ONCA) AND PUMAS (PUMA CONCOLOR) IN A NEOTROPICAL FOREST	JOURNAL OF MAMMALOGY	2009	90	3	612	620	Belize	NA	16.78	-88.5	Petén-Veracruz moist forests	Tropical & Subtropical Moist Broadleaf Forests	Neotropic	no
855	Harrison, Jordan T.; Kochert, Michael N.; Pauli, Benjamin P.; Heath, Julie A.	USING MOTION-ACTIVATED TRAIL CAMERAS TO STUDY DIET AND PRODUCTTVITY OF CLIFF-NESTING GOLDEN EAGLES	JOURNAL OF RAPTOR RESEARCH	2019	53	1	26	37	USA	NA	43.1333	-116.067	Snake-Columbia shrub steppe	Deserts & Xeric Shrublands	Nearctic	no
856	Hartman, Kyle J.; Andrew, Ross G.; Schwinghamer, Christopher W.; Thorne, David W.; Webster, Jeremy S.	Springtime Exploitation of Brook Trout by Anglers in Remote Headwater Streams of Central Appalachia	NORTH AMERICAN JOURNAL OF FISHERIES MANAGEMENT	2019	39	2	403	411	USA	NA	38.98	-79.52	Appalachian-Blue Ridge forests	Temperate Broadleaf & Mixed Forests	Nearctic	no
858	Hathcock, Charles D.; Hill, Michael T.	LOGGERHEAD SHRIKE PREDATION ON DUNE-DWELLING LIZARDS AND NESTING SUCCESS IN SOUTHEASTERN NEW MEXICO	SOUTHWESTERN NATURALIST	2018	63	4	220	224	USA	NA	32.93	-104.38	Chihuahuan desert	Deserts & Xeric Shrublands	Nearctic	no
858	Hathcock, Charles D.; Hill, Michael T.	LOGGERHEAD SHRIKE PREDATION ON DUNE-DWELLING LIZARDS AND NESTING SUCCESS IN SOUTHEASTERN NEW MEXICO	SOUTHWESTERN NATURALIST	2018	63	4	220	224	USA	NA	32.93	-104.38	Western shortgrass prairie	Temperate Grasslands, Savannas & Shrublands	Nearctic
859	Hatlauf, Jennifer; Hacklaender, Klaus	Preliminary results for golden jackal (Canis aureus) survey in Austria.	Beitraege zur Jagd- und Wildforschung	2016	41		295	305	Austria	Europe	47.6	16.51	Pannonian mixed forests	Temperate Broadleaf & Mixed Forests	Palearctic	no
860	Haurez, Barbara; Dainou, Kasso; Tagg, Nikki; Petre, Charles-Albert; Doucet, Jean-Louis	The role of great apes in seed dispersal of the tropical forest tree species Dacryodes normandii (Burseraceae) in Gabon	JOURNAL OF TROPICAL ECOLOGY	2015	31		395	402	Gabon	Africa	1	12.5	Northwest Congolian lowland forests	Tropical & Subtropical Moist Broadleaf Forests	Afrotropic	no
861	Havlin, Paige; Caravaggi, Anthony; Montgomery, W. Ian	The distribution and trophic ecology of an introduced, insular population of red-necked wallabies (Notamacropus rufogriseus)	CANADIAN JOURNAL OF ZOOLOGY	2018	96	4	357	365	UK	Europe	54.31	-4.53	Celtic broadleaf forests	Temperate Broadleaf & Mixed Forests	Palearctic	no
862	Havmoller, Rasmus Worsoe; Tenan, Simone; Scharff, Nikolaj; Rovero, Francesco	Reserve size and anthropogenic disturbance affect the density of an African leopard (Panthera pardus) meta-population	PLOS ONE	2019	14	6			Tanzania	Africa	-7.77	36.72	Dry miombo woodlands	Tropical & Subtropical Grasslands, Savannas & Shrublands	Afrotropic
862	Havmoller, Rasmus Worsoe; Tenan, Simone; Scharff, Nikolaj; Rovero, Francesco	Reserve size and anthropogenic disturbance affect the density of an African leopard (Panthera pardus) meta-population	PLOS ONE	2019	14	6			Tanzania	Africa	-7.77	36.72	Eastern Arc forests	Tropical & Subtropical Moist Broadleaf Forests	Afrotropic
863	Hayward, Matt W.; Hayward, Madeleine D.	Waterhole use by African fauna	SOUTH AFRICAN JOURNAL OF WILDLIFE RESEARCH	2012	42	2	117	127	South Africa	Africa	-25.33	27.15	Central bushveld	Tropical & Subtropical Grasslands, Savannas & Shrublands	Afrotropic	no
863	Hayward, Matt W.; Hayward, Madeleine D.	Waterhole use by African fauna	SOUTH AFRICAN JOURNAL OF WILDLIFE RESEARCH	2012	42	2	117	127	South Africa	Africa	-27.05	32.42	Maputaland coastal forests and woodlands	Tropical & Subtropical Moist Broadleaf Forests	Afrotropic
863	Hayward, Matt W.; Hayward, Madeleine D.	Waterhole use by African fauna	SOUTH AFRICAN JOURNAL OF WILDLIFE RESEARCH	2012	42	2	117	127	South Africa	Africa	-24.39	31.78	Limpopo lowveld	Tropical & Subtropical Grasslands, Savannas & Shrublands	Afrotropic
863	Hayward, Matt W.; Hayward, Madeleine D.	Waterhole use by African fauna	SOUTH AFRICAN JOURNAL OF WILDLIFE RESEARCH	2012	42	2	117	127	Botswana	Africa	-22.22	29.14	Zambezian mopane woodlands	Tropical & Subtropical Grasslands, Savannas & Shrublands	Afrotropic
864	Head, Josephine S.; Boesch, Christophe; Robbins, Martha M.; Rabanal, Luisa I.; Makaga, Loic; Kuehl, Hjalmar S.	Effective sociodemographic population assessment of elusive species in ecology and conservation management	ECOLOGY AND EVOLUTION	2013	3	9	2903	2916	Gabon	Africa	2º04?S	9º33?E	Congolian coastal forests	Tropical & Subtropical Moist Broadleaf Forests	Afrotropic	no
865	Head, Josephine S.; Robbins, Martha M.; Mundry, Roger; Makaga, Loic; Boesch, Christophe	Remote video-camera traps measure habitat use and competitive exclusion among sympatric chimpanzee, gorilla and elephant in Loango National Park, Gabon	JOURNAL OF TROPICAL ECOLOGY	2012	28		571	583	Gabon	Africa	2º04?S	9º33?E	Congolian coastal forests	Tropical & Subtropical Moist Broadleaf Forests	Afrotropic	no
866	Hearn, Andrew J.; Ross, Joanna; Bernard, Henry; Bakar, Soffian A.; Goossens, Benoit; Hunter, Luke T. B.; Macdonald, David W.	Responses of Sunda clouded leopard Neofelis diardi population density to anthropogenic disturbance: refining estimates of its conservation status in Sabah	ORYX	2019	53	4	643	653	Malaysia	Asia	5.55	117.47	Borneo lowland rain forests	Tropical & Subtropical Moist Broadleaf Forests	Indomalayan	no
867	Hearn, Andrew J.; Cushman, Samuel A.; Ross, Joanna; Goossens, Benoit; Hunter, Luke T. B.; Macdonald, David W.	Spatio-temporal ecology of sympatric felids on Borneo. Evidence for resource partitioning?	PLOS ONE	2018	13	7			Malaysia	Asia	5.55	117.47	Borneo lowland rain forests	Tropical & Subtropical Moist Broadleaf Forests	Indomalayan	no
868	Hearn, Andrew J.; Ross, Joanna; Bernard, Henry; Abu Bakar, Soffian; Hunter, Luke T. B.; Macdonald, David W.	The First Estimates of Marbled Cat Pardofelis marmorata Population Density from Bornean Primary and Selectively Logged Forest	PLOS ONE	2016	11	3			Malaysia	Asia	5.55	117.47	Borneo lowland rain forests	Tropical & Subtropical Moist Broadleaf Forests	Indomalayan	no
869	Hearn, Andrew J.; Ross, Joanna; Pamin, Daniel; Bernard, Henry; Hunter, Luke; Macdonald, David W.	INSIGHTS INTO THE SPATIAL AND TEMPORAL ECOLOGY OF THE SUNDA CLOUDED LEOPARD NEOFELIS DIARDI	RAFFLES BULLETIN OF ZOOLOGY	2013	61	2	871	875	Malaysia	Asia	5.05	117.5	Borneo lowland rain forests	Tropical & Subtropical Moist Broadleaf Forests	Indomalayan	yes
870	Hedges, L.; Clements, G. R.; Aziz, S. A.; Yap, W.; Laurance, S.; Goosem, M.; Laurance, W. F.	Small carnivore records from a threatened habitat linkage in Terengganu, Peninsular Malaysia	Small Carnivore Conservation	2013	49		9	14	Malaysia	Asia	5.18	102.67	Peninsular Malaysian rain forests	Tropical & Subtropical Moist Broadleaf Forests	Indomalayan	no
871	Hedges, Laurie; Morrant, Damian S.; Campos-Arceiz, Ahimsa; Clements, Gopalasamy Reuben	Feasibility of using scent-baited hair traps to monitor carnivore populations in Peninsular Malaysia	TROPICAL CONSERVATION SCIENCE	2015	8	4	975	982	Malaysia	Asia	4.9	101.88	Peninsular Malaysian rain forests	Tropical & Subtropical Moist Broadleaf Forests	Indomalayan	no
871	Hedges, Laurie; Morrant, Damian S.; Campos-Arceiz, Ahimsa; Clements, Gopalasamy Reuben	Feasibility of using scent-baited hair traps to monitor carnivore populations in Peninsular Malaysia	TROPICAL CONSERVATION SCIENCE	2015	8	4	975	982	Malaysia	Asia	4.9	101.88	Peninsular Malaysian montane rain forests	Tropical & Subtropical Moist Broadleaf Forests	Indomalayan
872	Hedges, Laurie; Lam, Wai Yee; Campos-Arceiz, Ahimsa; Rayan, D. Mark; Laurance, William F.; Latham, Chris J.; Saaban, Salman; Clements, Gopalasamy Reuben	Melanistic leopards reveal their spots: Infrared camera traps provide a population density estimate of leopards in malaysia	JOURNAL OF WILDLIFE MANAGEMENT	2015	79	5	846	853	Malaysia	Asia	5.24	103.04	Peninsular Malaysian rain forests	Tropical & Subtropical Moist Broadleaf Forests	Indomalayan	no
873	Hedwig, Daniela; Kienast, Ivonne; Bonnet, Matthieu; Curran, Bryan; Courage, Amos; Boesch, Christophe; Kuehl, Hjalmar; King, Tony	A camera trap assessment of the forest mammal community within the transitional savannah-forest mosaic of the Bateke Plateau National Park, Gabon	AFRICAN JOURNAL OF ECOLOGY	2018	56	4	777	790	Gabon	Africa	-2.17	14	Western Congolian forest-savanna	Tropical & Subtropical Grasslands, Savannas & Shrublands	Afrotropic	no
874	Hegel, Carla Grasiele Zanin; Santos, Luane Reis dos; Pichorim, Mauro; Marini, Miguel Ângelo	Wild pig (Sus scrofa L.) occupancy patterns in the Brazilian Atlantic forest	Biota Neotropica	2019	19	4	e20180719	e20180719	Brazil	SA	28º13'54.2" S	51º10'14.9" W	Araucaria moist forests	Tropical & Subtropical Moist Broadleaf Forests	Neotropic	no
876	Hegerl, Carla; Burgess, Neil D.; Nielsen, Martin R.; Martin, Emanuel; Ciolli, Marco; Rovero, Francesco	Using camera trap data to assess the impact of bushmeat hunting on forest mammals in Tanzania	ORYX	2017	51	1	87	97	Tanzania	Africa	-7.77	36.73	Dry miombo woodlands	Tropical & Subtropical Grasslands, Savannas & Shrublands	Afrotropic	no
876	Hegerl, Carla; Burgess, Neil D.; Nielsen, Martin R.; Martin, Emanuel; Ciolli, Marco; Rovero, Francesco	Using camera trap data to assess the impact of bushmeat hunting on forest mammals in Tanzania	ORYX	2017	51	1	87	97	Tanzania	Africa	-7.77	36.73	Eastern Arc forests	Tropical & Subtropical Moist Broadleaf Forests	Afrotropic
877	Hegglin, D; Bontadina, F; Gloor, S; Romer, J; Muller, U; Breitenmoser, U; Deplazes, P	Baiting red foxes in an urban area: A camera trap study	JOURNAL OF WILDLIFE MANAGEMENT	2004	68	4	1010	1017	Switzerland	Europe	47.38	8.54	Western European broadleaf forests	Temperate Broadleaf & Mixed Forests	Palearctic	yes
878	Heilbrun, RD; Silvy, NJ; Tewes, ME; Peterson, MJ	Using automatically triggered cameras to individually identify bobcats	WILDLIFE SOCIETY BULLETIN	2003	31	3	748	755	USA	NA	28.12	-97.44	Western Gulf coastal grasslands	Tropical & Subtropical Grasslands, Savannas & Shrublands	Nearctic	no
879	Heilbrun, Richard D.; Silvy, Nova J.; Peterson, Markus J.; Tewes, Michael E.	Estimating bobcat abundance using automatically triggered cameras	WILDLIFE SOCIETY BULLETIN	2006	34	1	69	73	USA	NA	28.12	-97.44	Western Gulf coastal grasslands	Tropical & Subtropical Grasslands, Savannas & Shrublands	Nearctic	no
880	Heim, Nicole; Fisher, Jason T.; Volpe, John; Clevenger, Anthony P.; Paczkowski, John	Carnivore community response to anthropogenic landscape change: species-specificity foils generalizations	LANDSCAPE ECOLOGY	2019	34	11	2493	2507	Canada	NA	51.38	-116.01	Northern Rockies conifer forests	Temperate Conifer Forests	Nearctic	no
881	Heiniger, Jaime; Gillespie, Graeme	High variation in camera trap-model sensitivity for surveying mammal species in northern Australia	WILDLIFE RESEARCH	2018	45	7	578	585	Australia	Australia	-14	136.89	Arnhem Land tropical savanna	Tropical & Subtropical grasslands, Savannas & Shrublands	Australasia	no
882	Heiniger, Jaime; Cameron, Skye F.; Gillespie, Graeme	Evaluation of risks for two native mammal species from feral cat baiting in monsoonal tropical northern Australia	WILDLIFE RESEARCH	2018	45	6	518	527	Australia	Australia	-14	136.89	Arnhem Land tropical savanna	Tropical & Subtropical grasslands, Savannas & Shrublands	Australasia	no
883	Heng, Sokrith; Dong, Tangkor; Hon, Naven; Olsson, Annette	The hairy-nosed otter Lutra sumatrana in Cambodia: distribution and notes on ecology and conservation.	Cambodian Journal of Natural History	2016	2		102	110	Cambodia	Asia
884	Henrich, Maik; Tietze, Dieter Thomas; Wink, Michael	Scavenging of small bird carrion in southwestern Germany by beetles, birds and mammals	JOURNAL OF ORNITHOLOGY	2017	158	1	287	295	Germany	Europe	49.4	8.72	Western European broadleaf forests	Temperate Broadleaf & Mixed Forests	Palearctic	no
885	Henschel, P.; Hunter, L. T. B.; Coad, L.; Abernethy, K. A.; Muehlenberg, M.	Leopard prey choice in the Congo Basin rainforest suggests exploitative competition with human bushmeat hunters	JOURNAL OF ZOOLOGY	2011	285	1	11	20	Gabon	Africa	0.14	12.7	Northwest Congolian lowland forests	Tropical & Subtropical Moist Broadleaf Forests	Afrotropic	no
886	Henschel, Philipp; Malanda, Guy-Aime; Hunter, Luke	The status of savanna carnivores in the Odzala-Kokoua National Park, northern Republic of Congo	JOURNAL OF MAMMALOGY	2014	95	4	882	892	Republic of Congo	Africa	1.31	14.85	Northwest Congolian lowland forests	Tropical & Subtropical Moist Broadleaf Forests	Afrotropic	no
887	Hepler, Staci A.; Erhardt, Robert; Anderson, T. Michael	Identifying drivers of spatial variation in occupancy with limited replication camera trap data	ECOLOGY	2018	99	10	2152	2158	Tanzania	Africa	-2.03	34.98	Southern Acacia-Commiphora bushlands and thickets	Tropical & Subtropical Grasslands, Savannas & Shrublands	Afrotropic	no
888	Hernandez-Perez, Edwin L.; Castillo-Vela, Guillermo; Garcia-Marmolejo, Gabriela; Sanvicente Lopez, Mauro; Reyna-Hurtado, Rafael	Wild pig (Sus scrofa) as prey of the Common Vampire Bat (Desmodus rotundus)	Therya	2019	10	2	195	199	Mexico	NA	18.44	-91.33	Petén-Veracruz moist forests	Tropical & Subtropical Moist Broadleaf Forests	Neotropic	no
889	Herrera, Hansel; Chavez, Elpis J.; Alfaro, Luis D.; Fuller, Todd K.; Montalvo, Victor; Rodrigues, Flavio; Carrillo, Eduardo	Time partitioning among jaguar Panthera onca, puma Puma concolor and ocelot Leopardus pardalis (Carnivora: Felidae) in Costa Rica's dry and rainforests	REVISTA DE BIOLOGIA TROPICAL	2018	66	4	1559	1568	Costa Rica	NA	8.55	-83.5	Isthmian-Pacific moist forests	Tropical & Subtropical Moist Broadleaf Forests	Neotropic	no
889	Herrera, Hansel; Chavez, Elpis J.; Alfaro, Luis D.; Fuller, Todd K.; Montalvo, Victor; Rodrigues, Flavio; Carrillo, Eduardo	Time partitioning among jaguar Panthera onca, puma Puma concolor and ocelot Leopardus pardalis (Carnivora: Felidae) in Costa Rica's dry and rainforests	REVISTA DE BIOLOGIA TROPICAL	2018	66	4	1559	1568	Costa Rica	NA	10.82	-85.71	Central American dry forests	Tropical & Subtropical Dry Broadleaf Forests	Neotropic	no
890	Heske, Edward J.; Rodgers, Torrey W.; Van Deelen, Timothy R.	Detection Bias in Noninvasive Track Surveys of Mammalian Predators in Illinois	Transactions of the Illinois State Academy of Science	2011	104	###	137	145	USA	NA	37.19	-89.22	Central US Forest-grasslands transition	Temperate Grasslands, Savannas & Shrublands	Nearctic	no
891	Hiby, Lex; Lovell, Phil; Patil, Narendra; Kumar, N. Samba; Gopalaswamy, Arjun M.; Karnath, K. Ullas	A tiger cannot change its stripes: using a three-dimensional model to match images of living tigers and tiger skins	BIOLOGY LETTERS	2009	5	3	383	386	India	Asia	11.78	76.39	South Western Ghats montane rain forests	Tropical & Subtropical Moist Broadleaf Forests	Indomalayan	no
892	Hickisch, Raffael; Aebischer, Thierry	African golden cat, caracal and serval in the Chinko/Mbari Drainage Basin, CAR.	Cat News	2013	58		22	23	Central African Republic	Africa	6.01	23.29	Northern Congolian Forest-Savanna	Tropical & Subtropical Grasslands, Savannas & Shrublands	Afrotropic	no
893	Hidalgo-Mihart, Mircea G.; Jesus-de La Cruz, Alejandro; Contreras-Moreno, Fernando M.; Juarez-Lopez, Rugieri; Bravata-de La Cruz, Yaribeth; Friedeberg, Diana; Bautista-Ramirez, Pedro	Jaguar density in a mosaic of disturbed/preserved areas in southeastern Mexico	MAMMALIAN BIOLOGY	2019	98		173	178	Mexico	NA	18.3306	-90.7639	Yucatán moist forests	Tropical & Subtropical Moist Broadleaf Forests	Neotropic	no
894	Hidalgo-Mihart, Mircea G.; Juarez-Lopez, Rugieri; Contreras-Moreno, Fernando; Jesus de la Cruz, Alejandro; Lopez-Luna, Marco A.; Bravata de la Cruz, Yaribeth	GREATER GRISON (GALICTIS VITTATTA) HUNTS A CENTRAL AMERICAN INDIGO SNAKE (DRYMARCHON MELANURUS) IN SOUTHEASTERN MEXICO	SOUTHWESTERN NATURALIST	2018	63	3	197	+	Mexico	NA	17.4059	91.4682	Petén-Veracruz moist forests	Tropical & Subtropical Moist Broadleaf Forests	Neotropic	no
895	Higashide, Daishi; Tanaka, Kazuo; Nakama, Eiichiro; Faudi, Hamdani; Satriadi, Trisnu; Aryadi, Mahrus	Camera-trap records of Sunda Stink-badger Mydaus javanensis and other small carnivores in South Kalimantan, Indonesia	Small Carnivore Conservation	2018	56		54	59	Indonesia	Asia	-3.69211	114.831	Borneo lowland rain forests	Tropical & Subtropical Moist Broadleaf Forests	Indomalayan	no
896	Higashide, Daishi; Miura, Shingo; Miguchi, Hideo	Evaluation of camera-trap designs for photographing chest marks of the free-ranging Asiatic black bear, Ursus thibetanus	MAMMAL STUDY	2013	38	1	35	39	Japan	Asia	39.7167	141.417	Nihonkai montane deciduous forest	Temperate Broadleaf & Mixed Forests	Palearctic	no
897	Higdon, Summer D.; Diggins, Corinne A.; Cherry, Michael J.; Ford, W. Mark	Activity patterns and temporal predator avoidance of white-tailed deer (Odocoileus virginianus) during the fawning season.	Journal of Ethology	2019	37	3	283	290	USA	NA	36°6.34?N	82°5.96?W	Appalachian-Blue Ridge forests	Temperate Broadleaf & Mixed Forests	Nearctic	no
900	Hill, Shane A.; Beard, Karen H.; Siers, Shane R.; Shiels, Aaron B.	Invasive coqui frogs are associated with differences in mongoose and rat abundances and diets in Hawaii	BIOLOGICAL INVASIONS	2019	21	6	2177	2190	USA	NA	19.65	-155.14	Hawai'I tropical moist forests	Tropical & Subtropical Moist Broadleaf Forests	Oceania
900	Hill, Shane A.; Beard, Karen H.; Siers, Shane R.; Shiels, Aaron B.	Invasive coqui frogs are associated with differences in mongoose and rat abundances and diets in Hawaii	BIOLOGICAL INVASIONS	2019	21	6	2177	2190	USA	NA	19.65	-155.14	Hawai'I tropical dry forests	Tropical & Subtropical Dry Broadleaf Forests	Oceania
901	Hilty, J. A.; Brooks, C.; Heaton, E.; Merenlender, A. M.	Forecasting the effect of land-use change on native and non-native mammalian predator distributions	BIODIVERSITY AND CONSERVATION	2006	15	9	2853	2871	USA	NA	38.58	-122.77	California interior chaparral and woodlands	Mediterranean Forests, Woodlands & Scrub	Nearctic	yes
902	Hilty, JA; Merenlender, AM	A comparison of covered track-plates and remotely-triggered cameras	TRANSACTIONS OF THE WESTERN SECTION OF THE WILDLIFE SOCIETY	2000			27	31	USA	NA	38.58	-122.77	California interior chaparral and woodlands	Mediterranean Forests, Woodlands & Scrub	Nearctic	yes
904	Hobbhahn, N.; Johnson, S. D.	Sunbird pollination of the dioecious root parasite Cytinus sanguineus (Cytinaceae)	SOUTH AFRICAN JOURNAL OF BOTANY	2015	99		138	143	South Africa	Africa	-32.86	18.77	Renosterveld shrubland	Mediterranean Forests, Woodlands & Scrub	Afrotropic	no
905	Hobbs, Michael T.; Brehme, Cheryl S.	An improved camera trap for amphibians, reptiles, small mammals, and large invertebrates	PLOS ONE	2017	12	10			USA	NA	36.98	-122.04	California interior chaparral and woodlands	Mediterranean Forests, Woodlands & Scrub	Nearctic	yes
906	Hodge, Anne-Marie C.; Arbogast, Brian S.	Carnivore diversity at a montane rainforest site in Ecuador's Gran Sumaco Biosphere Reserve	ORYX	2016	50	3	474	479	Ecuador	SA	-0.62	-77.6	Eastern Cordillera Real montane forests	Tropical & Subtropical Moist Broadleaf Forests	Neotropic	no
907	Hodge, Anne-Marie C.	Habitat selection of the margay (Leopardus wiedii) in the eastern Andean foothills of Ecuador	MAMMALIA	2014	78	3	351	358	Ecuador	SA	0°41?10.80?S	77°36?6.35?W	Eastern Cordillera Real montane forests	Tropical & Subtropical Moist Broadleaf Forests	Neotropic	no
908	Hody, Allison W.; Moreno, Ricardo; Meyer, Ninon F. V.; Pacifici, Krishna; Kays, Roland	Canid collision-expanding populations of coyotes (Canis latrans) and crab-eating foxes (Cerdocyon thous) meet up in Panama	JOURNAL OF MAMMALOGY	2019	100	6	1819	1830	Panama	NA	9.1	-79.3	Isthmian-Atlantic moist forests	Tropical & Subtropical Moist Broadleaf Forests	neotropic	yes
909	Hofmeester, Tim R.; Cromsigt, Joris P. G. M.; Odden, John; Andren, Henrik; Kindberg, Jonas; Linnell, John D. C.	Framing pictures: A conceptual framework to identify and correct for biases in detection probability of camera traps enabling multi-species comparison	ECOLOGY AND EVOLUTION	2019	9	4	2320	2336
910	Hofmeester, Tim R.; Rowcliffe, J. Marcus; Jansen, Patrick A.	A simple method for estimating the effective detection distance of camera traps	REMOTE SENSING IN ECOLOGY AND CONSERVATION	2017	3	2	81	89	Netherlands	Europe	52.2	5.36	European Atlantic mixed forests	Temperate Broadleaf & Mixed Forests	Palearctic	no
911	Holden, Jeremy; Meijaard, Erik	An orange-coloured Collared Mongoose Herpestes semitorquatus from Aceh, Sumatra, Indonesia	Small Carnivore Conservation	2012	47		26	29	Indonesia	Asia	5.32733	95.5906	Sumatran lowland rain forests	Tropical & Subtropical Moist Broadleaf Forests	Indomalayan	no
913	Hon, Jason	A new record for the Borneo bay cat in central Sarawak, Malaysian Borneo.	Cat News	2011	55	1	4	7	Malaysia	Asia	2.87	112.86	Borneo lowland rain forests	Tropical & Subtropical Moist Broadleaf Forests	Indomalayan	yes
914	Honda, Takeshi; Miyagawa, Yoshiki; Kuwata, Hiroshi; Yamasaki, Shuhei; Iijima, Hayato	Behavioral traits of damage-causing sika deer: open land preference	MAMMAL STUDY	2014	39	1	27	32	Japan	Asia	35.85	138.45	Taiheiyo montane deciduous forests	Temperate Broadleaf & Mixed Forests	Palearctic	no
915	Hongo, Shun; Nakashima, Yoshihiro; Akomo-Okoue, Etienne Francois; Mindonga-Nguelet, Fred Loique	Female Reproductive Seasonality and Male Influxes in Wild Mandrills (Mandrillus sphinx)	INTERNATIONAL JOURNAL OF PRIMATOLOGY	2016	37	3	416	437	Gabon	Asia	S2° 19?	E10° 34?	Congolian coastal forests	Tropical & Subtropical Moist Broadleaf Forests	Afrotropic	no
916	Hossain, Abu Naser Mohsin; Barlow, Adam; Barlow, Christina Greenwood; Lynam, Antony J.; Chakma, Suprio; Savini, Tommaso	Assessing the efficacy of camera trapping as a tool for increasing detection rates of wildlife crime in tropical protected areas	BIOLOGICAL CONSERVATION	2016	201		314	319	Bangladesh	Asia	21.8	89.4	Sundarbans mangroves	Mangroves	Indomalayan	no
917	Houlihan, Peter R.; Stone, Mac; Clem, Shawn E.; Owen, Mike; Emmel, Thomas C.	Pollination ecology of the ghost orchid (Dendrophylax lindenii): A first description with new hypotheses for Darwin's orchids	SCIENTIFIC REPORTS	2019	9				USA	NA	26°23?60?N	81°36?37?W	Everglades Flooded grasslands	Flooded Grasslands & Savannas	Neotropic	no
918	Howe, Eric J.; Buckland, Stephen T.; Despres-Einspenner, Marie-Lyne; Kuehl, Hjalmar S.	Model selection with overdispersed distance sampling data	METHODS IN ECOLOGY AND EVOLUTION	2019	10	1	38	47	Côte d'Ivoire	Africa	5.68	-6.95	Western Guinean lowland forests	Tropical & Subtropical Moist Broadleaf Forests	Afrotropic	no
919	Hsing, Pen-Yuan; Bradley, Steven; Kent, Vivien T.; Hill, Russell A.; Smith, Graham C.; Whittingham, Mark J.; Cokill, Jim; Crawley, Derek; Volunteers, MammalWeb; Stephens, Philip A.	Economical crowdsourcing for camera trap image classification	REMOTE SENSING IN ECOLOGY AND CONSERVATION	2018	4	4	361	374
920	Hu, Yun-Biao; Zhao, Qing-Shan; Lou, Ying-Qiang; Chen, Li-Jun; Antonio Gonzalez, Manuel; Sun, Yue-Hua	Parental attendance of Chestnut Thrush reduces nest predation during the incubation period: compensation for low nest concealment?	JOURNAL OF ORNITHOLOGY	2017	158	4	1111	1117	China	Asia	34º57?49?N	103º45?26?E	Southeast Tibet shrublands and meadows	Montane Grasslands & Shrublands	Palearctic	yes
922	Huang, Zhi-Pang; Qi, Xiao-Guang; Garber, Paul A.; Jin, Tong; Guo, Song-Tao; Li, Sheng; Li, Bao-Guo	The Use of Camera Traps to Identify the Set of Scavengers Preying on the Carcass of a Golden Snub-Nosed Monkey (Rhinopithecus roxellana)	PLOS ONE	2014	9	2			China	Asia	32.42	104.41	Daba Mountains evergreen forests	Temperate Broadleaf & Mixed Forests	Palearctic	no
923	Huguenin, Jade; Ferreira, Juliana Rodrigues; Moreira, Danielle Oliveira; Gatti, Andressa; Mendes, Sergio Lucena; Zanin, Marina	AN UPDATED SPECIES LIST OF MEDIUM AND LARGE-SIZED MAMMALS OF THE AUGUSTO RUSCHI BIOLOGICAL RESERVE, USING A NOVEL SAMPLING DESIGN	Oecologia Australis	2019	23	1	66	77	Brazil	SA	19°54’20”S	40°33’44”W	Bahia coastal forests	Tropical & Subtropical Moist Broadleaf Forests	Neotropic	no
924	Hummel, Sarah; Meyer, Larissa; Hacklander, Klaus; Weber, Darius	Activity of potential predators of European hare (Lepus europaeus) leverets and ground-nesting birds in wildflower strips	EUROPEAN JOURNAL OF WILDLIFE RESEARCH	2017	63	6			Switzerland	Europe	47° 27? N	7° 45? E	Western European broadleaf forests	Temperate Broadleaf & Mixed Forests	Palearctic	yes
926	Hurtado, Cindy M.; Pacheco, Victor	New mammalian records in the Parque Nacional Cerros de Amotape, northwestern Peru	Revista Peruana de Biologia	2015	22	1	77	86	Peru	SA	03°50’S	80°16’W	Eastern Cordillera Real montane forests	Tropical & Subtropical Moist Broadleaf Forests	Neotropic	no
926	Hurtado, Cindy M.; Pacheco, Victor	New mammalian records in the Parque Nacional Cerros de Amotape, northwestern Peru	Revista Peruana de Biologia	2015	22	1	77	86	Peru	SA	03°50’S	80°16’W	Tumbes-Plura dry forests	Tropical & Subtropical Dry Broadleaf Forests	Neotropic
928	Hushangabadkar, Prajakta; Jena, Jyotirmay; Borah, Jimmy; Dey, Soumen; Reddy, Marthala Srinivasa	Photographic record of rusty-spotted cats in Tipeshwar Wildlife Sanctuary, India.	Cat News	2018	67		29	30	India	Asia	19.3444	73.7914	Narmada Valley dry deciduous forests	Tropical & Subtropical Dry Broadleaf Forests	Indomalayan	no
929	Hynes, D.; Cleeland, M.	Extended range of bobucks Trichosurus cunninghami in south-west Gippsland, Victoria	Victorian Naturalist (Blackburn)	2010	127	1	15	19	Australia	Australia	-38.48	146.1	Eastern Australian temperate forests	Temperate Broadleaf & Mixed Forests	Australasia	no
929	Hynes, D.; Cleeland, M.	Extended range of bobucks Trichosurus cunninghami in south-west Gippsland, Victoria	Victorian Naturalist (Blackburn)	2010	127	1	15	19	Australia	Australia	-38.48	146.1	Southeast Australia temperate forests	Temperate Broadleaf & Mixed Forests	Australasia
930	Iannarilli, Fabiola; Arnold, Todd W.; Erb, John; Fieberg, John R.	Using lorelograms to measure and model correlation in binary data: Applications to ecological studies	METHODS IN ECOLOGY AND EVOLUTION	2019	10	12	2153	2162
931	Idris Jones, Samuel Edmond; Dorward, Leejiah Jonathon	Possible scavenging behavior in Ornate Hawk-Eagle (Spizaetus ornatus) in Amazonas, Brazil	REVISTA BRASILEIRA DE ORNITOLOGIA	2014	22	1	27	31	Brazil	SA	-5.36692	-67.2895	Juruá-Purus moist forests	Tropical & Subtropical Moist Broadleaf Forests	Neotropic	no
933	Iezzi, M. E.; Cruz, P.; Varela, D.; De Angelo, C.; Di Bitetti, M. S.	Tree monocultures in a biodiversity hotspot: Impact of pine plantations on mammal and bird assemblages in the Atlantic Forest	FOREST ECOLOGY AND MANAGEMENT	2018	424		216	227	Argentina	SA	-25.77	-54.24	Alto Paraná Atlantic forests	Tropical & Subtropical Moist Broadleaf Forests	Neotropic	yes
933	Iezzi, M. E.; Cruz, P.; Varela, D.; De Angelo, C.; Di Bitetti, M. S.	Tree monocultures in a biodiversity hotspot: Impact of pine plantations on mammal and bird assemblages in the Atlantic Forest	FOREST ECOLOGY AND MANAGEMENT	2018	424		216	227	Argentina	SA	-25.77	-54.24	Araucaria moist forests	Tropical & Subtropical Moist Broadleaf Forests	Neotropic
934	Iglay, Raymond B.; Schwarz, Kristin B.; Belant, Jerrold L.; Martin, James A.; Wang, Guiming; DeVault, Travis L.	Large Mammal Use of Seminatural Grasslands and Implications for Aviation Strike Risk	JOURNAL OF FISH AND WILDLIFE MANAGEMENT	2018	9	1	222	227	USA	NA	33.66°N	88.57°W	Southeast US conifer savannas	Temperate Grasslands, Savannas & Shrublands	Nearctic	yes
935	Iglesias, Jesus; Sanchez-Cordero, Victor; Magana-Cota, Gloria; Bolanos, Ricardo; Aranda, Marcelo; Hernandez, Raul; Javier Botello, Francisco	Noteworthy records of margay, Leopardus wiedii and ocelot, Leopardus pardalis in the state of Guanajuato, Mexico	MAMMALIA	2008	72	4	347	349	Mexico	NA	21.4583	-99.8833	Meseta Central matorral	Deserts & Xeric Shrublands	Nearctic	no
935	Iglesias, Jesus; Sanchez-Cordero, Victor; Magana-Cota, Gloria; Bolanos, Ricardo; Aranda, Marcelo; Hernandez, Raul; Javier Botello, Francisco	Noteworthy records of margay, Leopardus wiedii and ocelot, Leopardus pardalis in the state of Guanajuato, Mexico	MAMMALIA	2008	72	4	347	349	Mexico	NA	21.4583	-99.8833	Sierra Madre Oriental pine-oak forests	Tropical & Subtropical Coniferous Forests	Nearctic
935	Iglesias, Jesus; Sanchez-Cordero, Victor; Magana-Cota, Gloria; Bolanos, Ricardo; Aranda, Marcelo; Hernandez, Raul; Javier Botello, Francisco	Noteworthy records of margay, Leopardus wiedii and ocelot, Leopardus pardalis in the state of Guanajuato, Mexico	MAMMALIA	2008	72	4	347	349	Mexico	NA	21.4583	-99.8833	Veracruz moist forests	Tropical & Subtropical Moist Broadleaf Forests	Neotropic
936	Ikeda, Takashi; Takahashi, Hiroshi; Igota, Hiromasa; Matsuura, Yukiko; Azumaya, Munemitsu; Yoshida, Tsuyoshi; Kaji, Koichi	Effects of culling intensity on diel and seasonal activity patterns of sika deer (Cervus nippon)	SCIENTIFIC REPORTS	2019	9				Japan	Asia	42°36?N	140°51?E	Hokkaido montane conifer forests	Temperate Conifer Forests	Palearctic	yes
937	Ikeda, Takashi; Kuninaga, Naotoshi; Suzuki, Takaaki; Ikushima, Shiori; Suzuki, Masatsugu	Tourist-wild boar (Sus scrofa) interactions in urban wildlife management	GLOBAL ECOLOGY AND CONSERVATION	2019	18				Japan	Asia	35.433	136.75	Taiheiyo evergreen forest	Temperate Broadleaf & Mixed Forests	Palearctic	yes
938	Ikeda, Takashi; Uchida, Kenta; Matsuura, Yukiko; Takahashi, Hiroshi; Yoshida, Tsuyoshi; Kaji, Koichi; Koizumi, Itsuro	Seasonal and Diel Activity Patterns of Eight Sympatric Mammals in Northern Japan Revealed by an Intensive Camera-Trap Survey	PLOS ONE	2016	11	10			Japan	Asia	42.75	141.45	Hokkaido montane conifer forests	Temperate Conifer Forests	Palearctic	yes
939	Ikeda, Takashi; Takahashi, Hiroshi; Yoshida, Tsuyoshi; Igota, Hiromasa; Matsuura, Yukiko; Takeshita, Kazutaka; Kaji, Koichi	Seasonal variation of activity pattern in sika deer (Cervus nippon) as assessed by camera trap survey	MAMMAL STUDY	2015	40	4	199	205	Japan	Asia	42°36'N	140°51'E	Hokkaido montane conifer forests	Temperate Conifer Forests	Palearctic	yes
940	Ikeda, Takashi; Takahashi, Hiroshi; Yoshida, Tsuyoshi; Igota, Hiromasa; Kaji, Koichi	Evaluation of camera trap surveys for estimation of sika deer herd composition	MAMMAL STUDY	2013	38	1	29	33	Japan	Asia	42°36'N	140°51'E	Hokkaido montane conifer forests	Temperate Conifer Forests	Palearctic	yes
941	Ilemin, Yasin	A camera trapping survey reveals a melanistic Grey Wolf (Canis lupus) in an unusual habitat in Turkey (Mammalia: Carnivora)	ZOOLOGY IN THE MIDDLE EAST	2014	60	1	1	5	Turkey	Europe	36°82'N	28°19'E	Aegean and Western Turkey sclerophyllous and mixed forests	Mediterranean Forests, Woodlands & Scrub	Palearctic	no
942	Ilemin, Yasin; Gurkan, Behzat	Status and activity patterns of the Caracal, Caracal caracal (Schreber, 1776), in Datca and Bozburun Peninsulas, Southwestern Turkey	ZOOLOGY IN THE MIDDLE EAST	2010	50		3	10	Turkey	Europe	36.79	27.88	Aegean and Western Turkey sclerophyllous and mixed forests	Mediterranean Forests, Woodlands & Scrub	Palearctic	no
943	Indigo, Naomi; Smith, James; Webb, Jonathan K.; Phillips, Ben L.	Bangers and cash: baiting efficiency in a heterogeneous population	WILDLIFE SOCIETY BULLETIN	2019					Australia	Australia	16°24?S	125°30?E	Kimberly tropical savanna	Tropical & Subtropical Grasslands, Savannas & Shrublands	Australasia	no
945	Isbell, Lynne A.; Bidner, Laura R.	Vervet monkey (Chlorocebus pygerythrus) alarm calls to leopards (Panthera pardus) function as a predator deterrent	BEHAVIOUR	2016	153	5	591	606	Uganda	Africa	0.32°N	36.91°E	Victoria Basin forest-savanna	Tropical & Subtropical Grasslands, Savannas & Shrublands	Afrotropic	no
947	Islam, Saeedul; Nawaz, Rab; Moazzam, Muhammad	A SURVEY OF SMOOTH-COATED OTTER (LUTROGALE PERSPICILLATA SINDICA) AND FISHING CAT (PRIONAILURUS VIVERRIIVUS) IN CHOTIARI RESERVOIR, SANGHAR, PAKISTAN USING CAMERA TRAPS	International Journal of Biology and Biotechnology	2015	12	4	579	584	Pakistan	Asia	25.5	68	Aravalli west thorn scrub forests	Deserts & Xeric Shrublands	Indomalayan	no
947	Islam, Saeedul; Nawaz, Rab; Moazzam, Muhammad	A SURVEY OF SMOOTH-COATED OTTER (LUTROGALE PERSPICILLATA SINDICA) AND FISHING CAT (PRIONAILURUS VIVERRIIVUS) IN CHOTIARI RESERVOIR, SANGHAR, PAKISTAN USING CAMERA TRAPS	International Journal of Biology and Biotechnology	2015	12	4	579	584	Pakistan	Asia	25.5	68	Baluchistan xeric woodlands	Deserts & Xeric Shrublands	Palearctic
948	Ivan, Jacob S.; Seglund, Amy E.; Truex, Richard L.; Newkirk, Eric S.	Mammalian responses to changed forest conditions resulting from bark beetle outbreaks in the southern Rocky Mountains	ECOSPHERE	2018	9	8			USA	NA	39.34	-106.54	Colorado Rockies forests	Temperate Conifer Forests	Nearctic
949	Ivanov, Gjorge; Karamanlidis, Alexandros A.; Stojanov, Aleksandar; Melovski, Dimche; Avukatov, Vasko	The re-establishment of the golden jackal (Canis aureus) in FYR Macedonia: Implications for conservation	MAMMALIAN BIOLOGY	2016	81	3	326	330	North Macedonia	Europe	41.42	21.22	Balkan mixed forests	Temperate Broadleaf & Mixed Forests	Palearctic	yes
949	Ivanov, Gjorge; Karamanlidis, Alexandros A.; Stojanov, Aleksandar; Melovski, Dimche; Avukatov, Vasko	The re-establishment of the golden jackal (Canis aureus) in FYR Macedonia: Implications for conservation	MAMMALIAN BIOLOGY	2016	81	3	326	330	North Macedonia	Europe	41.42	21.22	Pindus Mountains mixed forests	Mediterranean Forests, Woodlands & Scrub	Palearctic
949	Ivanov, Gjorge; Karamanlidis, Alexandros A.; Stojanov, Aleksandar; Melovski, Dimche; Avukatov, Vasko	The re-establishment of the golden jackal (Canis aureus) in FYR Macedonia: Implications for conservation	MAMMALIAN BIOLOGY	2016	81	3	326	330	North Macedonia	Europe	41.42	21.22	Aegean and Western Turkey sclerophyllous and mixed forests	Mediterranean Forests, Woodlands & Scrub	Palearctic
950	Iwata, Yuji; Nakashima, Yoshihiro; Tsuchida, Sayaka; Nguema, Pierre Philippe Mbehang; Ando, Chieko; Ushida, Kazunari; Yamagiwa, Juichi	Decaying toxic wood as sodium supplement for herbivorous mammals in Gabon	JOURNAL OF VETERINARY MEDICAL SCIENCE	2015	77	10	1247	1252	Gabon	Africa	-2.54	10.35	Congolian coastal forests	Tropical & Subtropical Moist Broadleaf Forests	Afrotropic	no
951	Iwinski, Mateusz; Zydron, Adam; Chwialkowski, Cyprian; Dabrowski, Tomasz	The Use of a Camera Trap System for Monitoring the Movement of Forest Animals Through the Wildlife Crossing in Napchanie	ROCZNIK OCHRONA SRODOWISKA	2019	21	1	157	166	Poland	Europe	52.49	16.72	Central European mixed forests	Temperate Broadleaf & Mixed Forests	Palearctic	yes
953	Jachowski, David S.; Katzner, Todd; Rodrigue, Jane L.; Ford, W. Mark	Monitoring Landscape-Level Distribution and Migration Phenology of Raptors Using a Volunteer Camera-Trap Network		2015	39	3	553	563	USA	NA	38.38	-79.92	Appalachian-Blue Ridge forests	Temperate Broadleaf & Mixed Forests	Nearctic	no
953	Jachowski, David S.; Katzner, Todd; Rodrigue, Jane L.; Ford, W. Mark	Monitoring Landscape-Level Distribution and Migration Phenology of Raptors Using a Volunteer Camera-Trap Network		2015	39	3	553	563	USA	NA	38.38	-79.92	Appalachian mixed mesophytic forests	Temperate Broadleaf & Mixed Forests	Nearctic
953	Jachowski, David S.; Katzner, Todd; Rodrigue, Jane L.; Ford, W. Mark	Monitoring Landscape-Level Distribution and Migration Phenology of Raptors Using a Volunteer Camera-Trap Network		2015	39	3	553	563	USA	NA	38.38	-79.92	Northeast US Coastal forests	Temperate Broadleaf & Mixed Forests	Nearctic
953	Jachowski, David S.; Katzner, Todd; Rodrigue, Jane L.; Ford, W. Mark	Monitoring Landscape-Level Distribution and Migration Phenology of Raptors Using a Volunteer Camera-Trap Network		2015	39	3	553	563	USA	NA	38.38	-79.92	Mid-Atlantic US coastal savannas	Temperate Grasslands, Savannas & Shrublands	Nearctic
953	Jachowski, David S.; Katzner, Todd; Rodrigue, Jane L.; Ford, W. Mark	Monitoring Landscape-Level Distribution and Migration Phenology of Raptors Using a Volunteer Camera-Trap Network		2015	39	3	553	563	USA	NA	38.38	-79.92	Eastern Great Lakes lowland forests	Temperate Broadleaf & Mixed Forests	Nearctic
953	Jachowski, David S.; Katzner, Todd; Rodrigue, Jane L.; Ford, W. Mark	Monitoring Landscape-Level Distribution and Migration Phenology of Raptors Using a Volunteer Camera-Trap Network		2015	39	3	553	563	USA	NA	38.38	-79.92	New England-Acadian forests	Temperate Broadleaf & Mixed Forests	Nearctic
953	Jachowski, David S.; Katzner, Todd; Rodrigue, Jane L.; Ford, W. Mark	Monitoring Landscape-Level Distribution and Migration Phenology of Raptors Using a Volunteer Camera-Trap Network		2015	39	3	553	563	USA	NA	38.38	-79.92	Southern Great Lakes forests	Temperate Broadleaf & Mixed Forests	Nearctic
953	Jachowski, David S.; Katzner, Todd; Rodrigue, Jane L.; Ford, W. Mark	Monitoring Landscape-Level Distribution and Migration Phenology of Raptors Using a Volunteer Camera-Trap Network		2015	39	3	553	563	USA	NA	38.38	-79.92	Interior Plateau US Hardwood Forests	Temperate Broadleaf & Mixed Forests	Nearctic
953	Jachowski, David S.; Katzner, Todd; Rodrigue, Jane L.; Ford, W. Mark	Monitoring Landscape-Level Distribution and Migration Phenology of Raptors Using a Volunteer Camera-Trap Network		2015	39	3	553	563	USA	NA	38.38	-79.92	Southeast US conifer savannas	Temperate Grasslands, Savannas & Shrublands	Nearctic
954	Jackson, Rodney M.; Munkhtsog, Bariushaa; Mallon, David P.; Naranbaatar, Galsandorj; Gerelmaa, Khurlee	Camera-trapping snow leopards in the Tost Uul region of Mongolia.		2009	51		20	23	Mongolia	Asia	43°10'N	100°35'E	Alashan Plateau semi-desert	Deserts & Xeric Shrublands	Palearctic	no
955	Jackson, Rodney M.; Roe, Jerry D.; Wangchuk, Rinchen; Hunter, Don O.	Estimating snow leopard population abundance using photography and capture-recapture techniques		2006	34	3	772	781	India	Asia	33.71	77.39	Karakoram-West Tibetan Plateau alpine steppe	Montane Grasslands & Shrublands	Palearctic	no
956	Jacobs, Caitlin E.; Ausband, David E.	An evaluation of camera trap performance - What are we missing and does deployment height matter?		2018	4	4	352	360	USA	NA	45.17	-114.47	South Central Rockies forests	Temperate Conifer Forests	Nearctic	no
957	Jacobson, HA; Kroll, JC; Browning, RW; Koerth, BH; Conway, MH	Infrared-triggered cameras for censusing white-tailed deer		1997	25	2	547	556	USA	NA	31.14	-90.8	Southeast US conifer savannas	Temperate Grasslands, Savannas & Shrublands	Nearctic	no
958	Jacomo, ATDA; Silveira, L; Diniz, JAF	Niche separation between the maned wolf (Chrysocyon brachyurus), the crab-eating fox (Dusicyon thous) and the hoary fox (Dusicyon vetulus) in central Brazil		2004	262		99	106	Brazil	SA	18°19'S	52°45'W	Cerrado	Tropical & Subtropical Grasslands, Savannas & Shrublands	Neotropic	no
959	Jacques, Christopher N.; Klaver, Robert W.; Swearingen, Tim C.; Davis, Edward D.; Anderson, Charles R.; Jenks, Jonathan A.; Deperno, Christopher S.; Bluett, Robert D.	Estimating density and detection of bobcats in fragmented midwestern landscapes using spatial capture-recapture data from camera traps		2019	43	2	256	264	USA	NA	40.25	-90.84	Central US forest-grasslands transition	Temperate Grasslands, Savannas & Shrublands	Nearctic	yes
960	Jamaluddin Jamhuri; Samantha, L. D.; Tee SzeLing; Norizah Kamarudin; Ashton-Butt, A.; Akbar Zubaid; Lechner, A. M.; Badrul Azhar	Selective logging causes the decline of large-sized mammals including those in unlogged patches surrounded by logged and agricultural areas.		2018	227		40	47	Malaysia	Asia	2.95	102.04	Peninsular Malaysian rain forests	Tropical & Subtropical Moist Broadleaf Forests	Indomalayan	no
962	Jamie, Gabriel A.; Moya, Collins; Hamusikili, Lazaro	Incubation and nest-defence behaviour of Streaky-breasted Flufftail Sarothrura boehmi in Zambia.		2016	23	1	82	85	Zambia	Africa
963	Jamwal, Pushpinder Singh; Takpa, Jigmit; Chandan, Pankaj; Savage, Melissa	FIRST SYSTEMATIC SURVEY FOR OTTER (Lutra lutra) IN LADAKH, INDIAN TRANS HIMALAYAS.		2016	33	2	79	85	India	Asia	34.15	77.19	Karakoram-West Tibetan Plateau alpine steppe	Montane Grasslands & Shrublands	Palearctic	no
964	Janzen, Michael; Ritter, Ashley; Walker, Philip D.; Visscher, Darcy R.	EventFinder: a program for screening remotely captured images		2019	191	6			Canada	NA	53.59	-112.81	Canadian Aspen forests and parklands	Temperate Grasslands, Savannas & Shrublands	Nearctic	no
965	Janzen, Michael; Visser, Kaitlyn; Visscher, Darcy; MacLeod, Ian; Vujnovic, Dragomir; Vujnovic, Ksenija	Semi-automated camera trap image processing for the detection of ungulate fence crossing events		2017	189	10			Canada	NA	52.6	-110.64	Canadian Aspen forests and parklands	Temperate Grasslands, Savannas & Shrublands	Nearctic	no
966	Jax, Elinor; Marin, Sofia; Rodriguez-Ferraro, Adriana; Isasi-Catala, Emiliana	HABITAT USE AND RELATIVE ABUNDANCE OF THE SPOTTED PACA CUNICULUS PACA (LINNAEUS, 1766) (RODENTIA: CUNICULIDAE) AND THE RED-RUMPED AGOUTI DASYPROCTA LEPORINA (LINNAEUS, 1758) (RODENTIA: DASYPROCTIDAE) IN GUATOPO NATIONAL PARK, VENEZUELA		2015	7	1	6739	6749	Venezuela	SA	10.03N	66.41W	Cordillera La Costa montane forests	Tropical & Subtropical Moist Broadleaf Forests	Neotropic	no
966	Jax, Elinor; Marin, Sofia; Rodriguez-Ferraro, Adriana; Isasi-Catala, Emiliana	HABITAT USE AND RELATIVE ABUNDANCE OF THE SPOTTED PACA CUNICULUS PACA (LINNAEUS, 1766) (RODENTIA: CUNICULIDAE) AND THE RED-RUMPED AGOUTI DASYPROCTA LEPORINA (LINNAEUS, 1758) (RODENTIA: DASYPROCTIDAE) IN GUATOPO NATIONAL PARK, VENEZUELA		2015	7	1	6739	6749	Venezuela	SA	10.03N	66.41W	La Costa xeric shrublands	Deserts & Xeric Shrublands	Neotropic
967	Jayasekara, Palitha; Takatsuki, Seiki; Weerasinghe, Udayani R.; Wijesundara, Siril	Arboreal fruit visitors in a tropical forest in Sri Lanka.		2003	28	2	161	165	Sri Lanka	Asia	6.3	80.49	Sri Lanka lowland rain forests	Tropical & Subtropical Moist Broadleaf Forests	Indomalayan	no
967	Jayasekara, Palitha; Takatsuki, Seiki; Weerasinghe, Udayani R.; Wijesundara, Siril	Arboreal fruit visitors in a tropical forest in Sri Lanka.		2003	28	2	161	165	Sri Lanka	Asia	6.3	80.49	Sri Lanka dry-zone dry evergreen forests	Tropical & Subtropical Dry Broadleaf Forests	Indomalayan
968	Jedrzejewski, Wlodzimierz; Puerto, Maria F.; Goldberg, Joshua F.; Hebblewhite, Mark; Abarca, Maria; Gamarra, Gertrudis; Calderon, Luis E.; Romero, Jose F.; Viloria, Angel L.; Carreno, Rafael; Robinson, Hugh S.; Lampo, Margarita; Boede, Ernesto O.; Biganzoli, Alejandro; Stachowicz, Izabela; Velasquez, Grisel; Schmidt, Krzysztof	Density and population structure of the jaguar (Panthera onca) in a protected area of Los Llanos, Venezuela, from 1 year of camera trap monitoring		2017	62	1	9	19	Venezuela	SA	8.9827° N–8.8562° N	68.0334° W–68.2148° W	Llanos	Tropical & Subtropical Grasslands, Savannas & Shrublands	Neotropic	yes
969	Jeffers, Karen Anne; Adul; Cheyne, Susan Mary	SMALL CAT SURVEYS: 10 YEARS OF DATA FROM CENTRAL KALIMANTAN, INDONESIAN BORNEO		2019	11	4	13478	13491	Indonesia	Asia	-1.97	113.71	Sundaland heath forests	Tropical & Subtropical Moist Broadleaf Forests	Indomalayan	no
969	Jeffers, Karen Anne; Adul; Cheyne, Susan Mary	SMALL CAT SURVEYS: 10 YEARS OF DATA FROM CENTRAL KALIMANTAN, INDONESIAN BORNEO		2019	11	4	13478	13491	Indonesia	Asia	-1.97	113.71	Borneo lowland rain forests	Tropical & Subtropical Moist Broadleaf Forests	Indomalayan
969	Jeffers, Karen Anne; Adul; Cheyne, Susan Mary	SMALL CAT SURVEYS: 10 YEARS OF DATA FROM CENTRAL KALIMANTAN, INDONESIAN BORNEO		2019	11	4	13478	13491	Indonesia	Asia	-1.97	113.71	Southwest Borneo freshwater swamp forests	Tropical & Subtropical Moist Broadleaf Forests	Indomalayan
969	Jeffers, Karen Anne; Adul; Cheyne, Susan Mary	SMALL CAT SURVEYS: 10 YEARS OF DATA FROM CENTRAL KALIMANTAN, INDONESIAN BORNEO		2019	11	4	13478	13491	Indonesia	Asia	-1.97	113.71	Borneo peat swamp forests	Tropical & Subtropical Moist Broadleaf Forests	Indomalayan
970	Jeganathan, P; Green, RE; Bowden, CGR; Norris, K; Pain, D; Rahmani, A	Use of tracking strips and automatic cameras for detecting Critically Endangered Jerdon's coursers Rhinoptilus bitorquatus in scrub jungle in Andhra Pradesh, India		2002	36	2	182	188	India	Asia	14°N	79°E	Deccan thorn scrub forests	Deserts & Xeric Shrublands	Indomalayan	yes
971	Jenks, Kate E.; Howard, JoGayle; Leimgruber, Peter	Do Ranger Stations Deter Poaching Activity in National Parks in Thailand?		2012	44	6	826	833	Thailand	Asia	14°26'29"N	101°22'11"E	Southeast Indochina dry evergreen forests	Tropical & Subtropical Dry Broadleaf Forests	Indomalayan	no
972	Jenks, Kate E.; Songsasen, Nucharin; Leimgruber, Peter	Camera trap records of dholes in Khao Ang Rue Nai Wildlife Sanctuary, Thailand.		2012	15	4	1	5	Thailand	Asia	13°00' N–13°32'N	101°40'E–102°09'E	Cardamom Mountains rain forests	Tropical & Subtropical Moist Broadleaf Forests	Indomalayan	no
973	Jenks, Kate E.; Chanteap, Prawatsart; Damrongchainarong, Kanda; Cutter, Peter; Cutter, Passanan; Redford, Tim; Lynam, Antony J.; Howard, JoGayle; Leimgruber, Peter	Using relative abundance indices from camera-trapping to test wildlife conservation hypotheses - an example from Khao Yai National Park, Thailand		2011	4	2	113	131	Thailand	Asia	14°26'29"N	101°22'11"E	Southeast Indochina dry evergreen forests	Tropical & Subtropical Dry Broadleaf Forests	Indomalayan	no
974	Jenks, Kate E.; Wanghongsa, Sawai; Songsasen, Nucharin; Leimgruber, Peter; Howard, JoGayle	Camera-trap evidence of Large-spotted Civet Viverra megaspila in Khao Ang Rue Nai Wildlife Sanctuary and Khao Yai National Park, Thailand		2010	42		19	21	Thailand	Asia	14°05–15?N	101°05–50?E	Chao Phraya freshwater swamp forests	Tropical & Subtropical Moist Broadleaf Forests	Indomalayan	no
974	Jenks, Kate E.; Wanghongsa, Sawai; Songsasen, Nucharin; Leimgruber, Peter; Howard, JoGayle	Camera-trap evidence of Large-spotted Civet Viverra megaspila in Khao Ang Rue Nai Wildlife Sanctuary and Khao Yai National Park, Thailand		2010	42		19	21	Thailand	Asia	14°05–15?N	101°05–50?E	Central Indochina dry forests	Tropical & Subtropical Dry Broadleaf Forests	Indomalayan
975	Jennelle, Christopher S.; Samuel, Michael D.; Nolden, Cherrie A.; Berkley, Elizabeth A.	Deer Carcass Decomposition and Potential Scavenger Exposure to Chronic Wasting Disease		2009	73	5	655	662	USA	NA	43.01	-89.84	Central US forest-grasslands transition	Temperate Grasslands, Savannas & Shrublands	Nearctic	yes
975	Jennelle, Christopher S.; Samuel, Michael D.; Nolden, Cherrie A.; Berkley, Elizabeth A.	Deer Carcass Decomposition and Potential Scavenger Exposure to Chronic Wasting Disease		2009	73	5	655	662	USA	NA	43.01	-89.84	Upper Midwest US forest-savanna transition	Temperate Broadleaf & Mixed Forests	Nearctic
977	Jennings, Andrew P.; Naim, Mohd; Advento, Andreas Dwi; Aryawan, Anak Agung Ketut; Ps, Sudharto; Caliman, Jean-Pierre; Verwilghen, Aude; Veron, Geraldine	Diversity and occupancy of small carnivores within oil palm plantations in central Sumatra, Indonesia		2015	60	2	181	188	Indonesia	Asia	0.79	101.85	Sumatran peat swamp forests	Tropical & Subtropical Moist Broadleaf Forests	Indomalayan	yes
977	Jennings, Andrew P.; Naim, Mohd; Advento, Andreas Dwi; Aryawan, Anak Agung Ketut; Ps, Sudharto; Caliman, Jean-Pierre; Verwilghen, Aude; Veron, Geraldine	Diversity and occupancy of small carnivores within oil palm plantations in central Sumatra, Indonesia		2015	60	2	181	188	Indonesia	Asia	0.79	101.85	Sumatran lowland rain forests	Tropical & Subtropical Moist Broadleaf Forests	Indomalayan
979	Jhala, Yadvendradev; Qureshi, Qamar; Gopal, Rajesh	Can the abundance of tigers be assessed from their signs?		2011	48	1	14	24	India	Asia	23.12	80.57	Central Deccan Plateau dry deciduous forests	Tropical & Subtropical Dry Broadleaf Forests	Indomalayan	no
979	Jhala, Yadvendradev; Qureshi, Qamar; Gopal, Rajesh	Can the abundance of tigers be assessed from their signs?		2011	48	1	14	24	India	Asia	23.12	80.57	Narmada Valley dry deciduous forests	Tropical & Subtropical Dry Broadleaf Forests	Indomalayan
979	Jhala, Yadvendradev; Qureshi, Qamar; Gopal, Rajesh	Can the abundance of tigers be assessed from their signs?		2011	48	1	14	24	India	Asia	23.12	80.57	East Deccan moist deciduous forests	Tropical & Subtropical Moist Broadleaf Forests	Indomalayan
979	Jhala, Yadvendradev; Qureshi, Qamar; Gopal, Rajesh	Can the abundance of tigers be assessed from their signs?		2011	48	1	14	24	India	Asia	23.12	80.57	Khathiar-Gir dry deciduous forests	Tropical & Subtropical Dry Broadleaf Forests	Indomalayan
979	Jhala, Yadvendradev; Qureshi, Qamar; Gopal, Rajesh	Can the abundance of tigers be assessed from their signs?		2011	48	1	14	24	India	Asia	23.12	80.57	East Deccan moist deciduous forests	Tropical & Subtropical Moist Broadleaf Forests	Indomalayan
979	Jhala, Yadvendradev; Qureshi, Qamar; Gopal, Rajesh	Can the abundance of tigers be assessed from their signs?		2011	48	1	14	24	India	Asia	23.12	80.57	Himalayan subtropical broadleaf forests	Tropical & Subtropical Moist Broadleaf Forests	Indomalayan
[truncated: 1,892 more rows]

## Sheet: Metadata
Variable Name	Details
PaperID	Unique internal identifier for each publication
[truncated: 17 more rows]

[truncated: 1 more sheets: WoS Search String]
